# Supplementary material for: Leveraging Gene Redundancy to Find New Histone Drivers in Cancer
Source: Cancers (Basel). 2023 Jun 30;15(13):3437. doi: 10.3390/cancers15133437 (PMC10340511; doi:10.3390/cancers15133437)
Supplement: Supplementary file 1 [file cancers-15-03437-s001.zip › cancers-2446076-Tables.xlsx]

## Sheet: Table S1
Supplementary Table S1. HUGO gene symbols for histone genes and the Uniprot accessions for their protein products
hugo_symbol	protein_name	histone_type	uniprot_accession
CENPA	centromere protein A	H3	P49450
H1-0	H1.0 linker histone	H1	P07305
H1-1	H1.1 linker histone, cluster member	H1	Q02539
H1-10	H1.10 linker histone	H1	Q92522
H1-2	H1.2 linker histone, cluster member	H1	P16403
H1-3	H1.3 linker histone, cluster member	H1	P16402
H1-4	H1.4 linker histone, cluster member	H1	P10412
H1-5	H1.5 linker histone, cluster member	H1	P16401
H1-6	H1.6 linker histone, cluster member	H1	P22492
H1-7	H1.7 linker histone	H1	Q75WM6
H1-8	H1.8 linker histone	H1	Q8IZA3
H2AB1	H2A.B variant histone 1	H2A	P0C5Y9
H2AB2	H2A.B variant histone 2	H2A	P0C5Z0
H2AB3	H2A.B variant histone 3	H2A	P0C5Z0
H2AC1	H2A clustered histone 1	H2A	Q96QV6
H2AC11	H2A clustered histone 11	H2A	P0C0S8
H2AC12	H2A clustered histone 12	H2A	Q96KK5
H2AC13	H2A clustered histone 13	H2A	P0C0S8
H2AC14	H2A clustered histone 14	H2A	Q99878
H2AC15	H2A clustered histone 15	H2A	P0C0S8
H2AC16	H2A clustered histone 16	H2A	P0C0S8
H2AC17	H2A clustered histone 17	H2A	P0C0S8
H2AC18	H2A clustered histone 18	H2A	Q6FI13
H2AC19	H2A clustered histone 19	H2A	Q6FI13
H2AC20	H2A clustered histone 20	H2A	Q16777
H2AC21	H2A clustered histone 21	H2A	Q8IUE6
H2AC25	Histone H2A type 3	H2A	Q7L7L0
H2AC4	H2A clustered histone 4	H2A	P04908
H2AC6	H2A clustered histone 6	H2A	Q93077
H2AC7	H2A clustered histone 7	H2A	P20671
H2AC8	H2A clustered histone 8	H2A	P04908
H2AJ	H2A.J histone	H2A	Q9BTM1
H2AL3	Histone H2A-like 3	H2A	A0A3B3IU63
H2AP	H2A.P histone	H2A	O75409
H2AX	H2A.X variant histone	H2A	P16104
H2AZ1	H2A.Z variant histone 1	H2A	P0C0S5
H2AZ2	H2A.Z variant histone 2	H2A	Q71UI9
H2BC1	H2B clustered histone 1	H2B	Q96A08
H2BC10	H2B clustered histone 10	H2B	P62807
H2BC11	H2B clustered histone 11	H2B	P06899
H2BC12	H2B clustered histone 12	H2B	O60814
H2BC12L	Histone H2B type F-S	H2B	P57053
H2BC13	H2B clustered histone 13	H2B	Q99880
H2BC14	H2B clustered histone 14	H2B	Q99879
H2BC15	H2B clustered histone 15	H2B	Q99877
H2BC17	H2B clustered histone 17	H2B	P23527
H2BC18	H2B clustered histone 18	H2B	Q5QNW6
H2BC21	H2B clustered histone 21	H2B	Q16778
H2BC26	Histone H2B type 3-B	H2B	Q8N257
H2BC3	H2B clustered histone 3	H2B	P33778
H2BC4	H2B clustered histone 4	H2B	P62807
H2BC5	H2B clustered histone 5	H2B	P58876
H2BC6	H2B clustered histone 6	H2B	P62807
H2BC7	H2B clustered histone 7	H2B	P62807
H2BC8	H2B clustered histone 8	H2B	P62807
H2BC9	H2B clustered histone 9	H2B	Q93079
H2BK1	Histone H2B type 2-K1	H2B	A0A2R8Y619
H2BW1	H2B.W histone 1	H2B	Q7Z2G1
H2BW2	H2B.W histone 2	H2B	P0C1H6
H3-3A	H3.3 histone A	H3	P84243
H3-3B	H3.3 histone B	H3	P84243
H3-4	H3.4 histone	H3	Q16695
H3-5	H3.5 histone	H3	Q6NXT2
H3-7	Histone H3-7	H3	Q5TEC6
H3C1	H3 clustered histone 1	H3	P68431
H3C10	H3 clustered histone 10	H3	P68431
H3C11	H3 clustered histone 11	H3	P68431
H3C12	H3 clustered histone 12	H3	P68431
H3C13	H3 clustered histone 13	H3	Q71DI3
H3C14	H3 clustered histone 14	H3	Q71DI3
H3C15	H3 clustered histone 15	H3	Q71DI3
H3C2	H3 clustered histone 2	H3	P68431
H3C3	H3 clustered histone 3	H3	P68431
H3C4	H3 clustered histone 4	H3	P68431
H3C6	H3 clustered histone 6	H3	P68431
H3C7	H3 clustered histone 7	H3	P68431
H3C8	H3 clustered histone 8	H3	P68431
H3Y1	H3.Y histone 1	H3	P0DPK2
H3Y2	H3.Y histone 2	H3	P0DPK5
H4C1	H4 clustered histone 1	H4	P62805
H4C11	H4 clustered histone 11	H4	P62805
H4C12	H4 clustered histone 12	H4	P62805
H4C13	H4 clustered histone 13	H4	P62805
H4C14	H4 clustered histone 14	H4	P62805
H4C15	H4 clustered histone 15	H4	P62805
H4C16	Histone H4	H4	P62805
H4C2	H4 clustered histone 2	H4	P62805
H4C3	H4 clustered histone 3	H4	P62805
H4C4	H4 clustered histone 4	H4	P62805
H4C5	H4 clustered histone 5	H4	P62805
H4C6	H4 clustered histone 6	H4	P62805
H4C7	H4 clustered histone 7	H4	Q99525
H4C8	H4 clustered histone 8	H4	P62805
H4C9	H4 clustered histone 9	H4	P62805
MACROH2A1	macroH2A.1 histone	H2A	O75367
MACROH2A2	macroH2A.2 histone	H2A	Q9P0M6

## Sheet: Table S2
Supplementary Table S2. Coding sequence mutation rates for histone genes, by cancer type
chromosome	ncbi_accession	hugo_symbol	entrez_gene_id	ccds_id	cds_strand	cds_from	cds_to	cds_length	mutation_counts	mutation_rate	cancer_type
6	NC_000006.12	H2BC14	8342	CCDS4629.1	+	27815043	27815423	381	66	0.173228	Pancancer
6	NC_000006.12	H2BC14	8342	CCDS4629.1	+	27815043	27815423	381	12	0.0314961	Adenocarcinoma, NOS
6	NC_000006.12	H2BC14	8342	CCDS4629.1	+	27815043	27815423	381	10	0.0262467	Squamous cell carcinoma, NOS
6	NC_000006.12	H2BC14	8342	CCDS4629.1	+	27815043	27815423	381	2	0.00524934	Infiltrating duct carcinoma, NOS
6	NC_000006.12	H2BC14	8342	CCDS4629.1	+	27815043	27815423	381	5	0.0131234	Multiple myeloma
6	NC_000006.12	H2BC14	8342	CCDS4629.1	+	27815043	27815423	381	0	0	Glioblastoma
6	NC_000006.12	H2BC14	8342	CCDS4629.1	+	27815043	27815423	381	1	0.00262467	Serous cystadenocarcinoma, NOS
6	NC_000006.12	H2BC14	8342	CCDS4629.1	+	27815043	27815423	381	0	0	Papillary adenocarcinoma, NOS
6	NC_000006.12	H2BC14	8342	CCDS4629.1	+	27815043	27815423	381	1	0.00262467	Clear cell adenocarcinoma, NOS
6	NC_000006.12	H2BC14	8342	CCDS4629.1	+	27815043	27815423	381	14	0.0367454	Endometrioid adenocarcinoma, NOS
6	NC_000006.12	H2BC14	8342	CCDS4629.1	+	27815043	27815423	381	1	0.00262467	Malignant melanoma, NOS
6	NC_000006.12	H2BC14	8342	CCDS4629.1	+	27815043	27815423	381	3	0.00787402	Hepatocellular carcinoma, NOS
6	NC_000006.12	H2BC14	8342	CCDS4629.1	+	27815043	27815423	381	3	0.00787402	Transitional cell carcinoma
6	NC_000006.12	H2BC14	8342	CCDS4629.1	+	27815043	27815423	381	0	0	Lobular carcinoma, NOS
6	NC_000006.12	H2BC14	8342	CCDS4629.1	+	27815043	27815423	381	1	0.00262467	Acute myeloid leukemia, NOS
6	NC_000006.12	H2BC14	8342	CCDS4629.1	+	27815043	27815423	381	3	0.00787402	Mucinous adenocarcinoma
6	NC_000006.12	H2BC14	8342	CCDS4629.1	+	27815043	27815423	381	0	0	Mixed glioma
6	NC_000006.12	H2BC14	8342	CCDS4629.1	+	27815043	27815423	381	0	0	Astrocytoma, anaplastic
6	NC_000006.12	H2BC14	8342	CCDS4629.1	+	27815043	27815423	381	0	0	Renal cell carcinoma, NOS
6	NC_000006.12	H2BC14	8342	CCDS4629.1	+	27815043	27815423	381	0	0	Adenocarcinoma with mixed subtypes
6	NC_000006.12	H2BC14	8342	CCDS4629.1	+	27815043	27815423	381	0	0	Renal cell carcinoma, chromophobe type
6	NC_000006.12	H2BC14	8342	CCDS4629.1	+	27815043	27815423	381	1	0.00262467	Oligodendroglioma, NOS
6	NC_000006.12	H2BC14	8342	CCDS4629.1	+	27815043	27815423	381	0	0	Squamous cell carcinoma, keratinizing, NOS
6	NC_000006.12	H2BC14	8342	CCDS4629.1	+	27815043	27815423	381	0	0	Papillary carcinoma, follicular variant
6	NC_000006.12	H2BC14	8342	CCDS4629.1	+	27815043	27815423	381	0	0	Serous adenocarcinoma, NOS
6	NC_000006.12	H2BC14	8342	CCDS4629.1	+	27815043	27815423	381	0	0	Leiomyosarcoma, NOS
6	NC_000006.12	H2BC14	8342	CCDS4629.1	+	27815043	27815423	381	0	0	Adenocarcinoma, intestinal type
6	NC_000006.12	H2BC14	8342	CCDS4629.1	+	27815043	27815423	381	1	0.00262467	Adrenal cortical carcinoma
6	NC_000006.12	H2BC14	8342	CCDS4629.1	+	27815043	27815423	381	2	0.00524934	Tubular adenocarcinoma
6	NC_000006.12	H2BC14	8342	CCDS4629.1	+	27815043	27815423	381	0	0	Oligodendroglioma, anaplastic
6	NC_000006.12	H2BC14	8342	CCDS4629.1	+	27815043	27815423	381	1	0.00262467	Carcinoma, diffuse type
6	NC_000006.12	H2BC14	8342	CCDS4629.1	+	27815043	27815423	381	1	0.00262467	Papillary transitional cell carcinoma
6	NC_000006.12	H2BC14	8342	CCDS4629.1	+	27815043	27815423	381	0	0	Seminoma, NOS
6	NC_000006.12	H2BC14	8342	CCDS4629.1	+	27815043	27815423	381	0	0	Squamous cell carcinoma, large cell, nonkeratinizing, NOS
6	NC_000006.12	H2BC14	8342	CCDS4629.1	+	27815043	27815423	381	0	0	Astrocytoma, NOS
6	NC_000006.12	H2BC14	8342	CCDS4629.1	+	27815043	27815423	381	0	0	Dedifferentiated liposarcoma
6	NC_000006.12	H2BC14	8342	CCDS4629.1	+	27815043	27815423	381	0	0	Epithelioid mesothelioma, malignant
6	NC_000006.12	H2BC14	8342	CCDS4629.1	+	27815043	27815423	381	0	0	Cholangiocarcinoma
6	NC_000006.12	H2BC14	8342	CCDS4629.1	+	27815043	27815423	381	1	0.00262467	Malignant lymphoma, large B-cell, diffuse, NOS
6	NC_000006.12	H2BC14	8342	CCDS4629.1	+	27815043	27815423	381	0	0	Mullerian mixed tumor
6	NC_000006.12	H2BC14	8342	CCDS4629.1	+	27815043	27815423	381	0	0	Mixed epithelioid and spindle cell melanoma
6	NC_000006.12	H2BC14	8342	CCDS4629.1	+	27815043	27815423	381	0	0	Pheochromocytoma, malignant
6	NC_000006.12	H2BC14	8342	CCDS4629.1	+	27815043	27815423	381	0	0	Papillary carcinoma, columnar cell
6	NC_000006.12	H2BC14	8342	CCDS4629.1	+	27815043	27815423	381	0	0	Undifferentiated sarcoma
6	NC_000006.12	H2BC14	8342	CCDS4629.1	+	27815043	27815423	381	0	0	Thymoma, type AB, malignant
6	NC_000006.12	H2BC14	8342	CCDS4629.1	+	27815043	27815423	381	0	0	Infiltrating duct and lobular carcinoma
6	NC_000006.12	H2BC14	8342	CCDS4629.1	+	27815043	27815423	381	0	0	Mixed germ cell tumor
6	NC_000006.12	H2BC14	8342	CCDS4629.1	+	27815043	27815423	381	0	0	Basaloid squamous cell carcinoma
6	NC_000006.12	H2BC14	8342	CCDS4629.1	+	27815043	27815423	381	0	0	Thymoma, type B2, malignant
6	NC_000006.12	H2BC14	8342	CCDS4629.1	+	27815043	27815423	381	0	0	Embryonal carcinoma, NOS
6	NC_000006.12	H2BC14	8342	CCDS4629.1	+	27815043	27815423	381	0	0	Fibromyxosarcoma
6	NC_000006.12	H2BC14	8342	CCDS4629.1	+	27815043	27815423	381	0	0	Spindle cell melanoma, NOS
6	NC_000006.12	H2BC14	8342	CCDS4629.1	+	27815043	27815423	381	0	0	Acinar cell carcinoma
6	NC_000006.12	H2BC14	8342	CCDS4629.1	+	27815043	27815423	381	0	0	Mesothelioma, biphasic, malignant
6	NC_000006.12	H2BC14	8342	CCDS4629.1	+	27815043	27815423	381	0	0	Adenocarcinoma, endocervical type
6	NC_000006.12	H2BC14	8342	CCDS4629.1	+	27815043	27815423	381	1	0.00262467	Nodular melanoma
6	NC_000006.12	H2BC14	8342	CCDS4629.1	+	27815043	27815423	381	0	0	Epithelioid cell melanoma
6	NC_000006.12	H2BC14	8342	CCDS4629.1	+	27815043	27815423	381	0	0	Infiltrating duct mixed with other types of carcinoma
6	NC_000006.12	H2BC14	8342	CCDS4629.1	+	27815043	27815423	381	0	0	Bronchiolo-alveolar carcinoma, non-mucinous
6	NC_000006.12	H2BC14	8342	CCDS4629.1	+	27815043	27815423	381	0	0	Mucinous adenocarcinoma, endocervical type
6	NC_000006.12	H2BC14	8342	CCDS4629.1	+	27815043	27815423	381	0	0	Metaplastic carcinoma, NOS
6	NC_000006.12	H2BC14	8342	CCDS4629.1	+	27815043	27815423	381	0	0	Signet ring cell carcinoma
6	NC_000006.12	H2BC14	8342	CCDS4629.1	+	27815043	27815423	381	0	0	Thymoma, type A, malignant
6	NC_000006.12	H2BC14	8342	CCDS4629.1	+	27815043	27815423	381	0	0	Thymoma, type B3, malignant
6	NC_000006.12	H2BC14	8342	CCDS4629.1	+	27815043	27815423	381	0	0	Thymoma, type B1, malignant
6	NC_000006.12	H2BC14	8342	CCDS4629.1	+	27815043	27815423	381	0	0	Malignant fibrous histiocytoma
6	NC_000006.12	H2BC14	8342	CCDS4629.1	+	27815043	27815423	381	0	0	Infiltrating lobular carcinoma, NOS
6	NC_000006.12	H2BC14	8342	CCDS4629.1	+	27815043	27815423	381	0	0	Carcinosarcoma, NOS
6	NC_000006.12	H2BC14	8342	CCDS4629.1	+	27815043	27815423	381	0	0	Thymic carcinoma, NOS
6	NC_000006.12	H2AC4	8335	CCDS4574.1	-	26033175	26033567	393	51	0.129771	Pancancer
6	NC_000006.12	H2AC4	8335	CCDS4574.1	-	26033175	26033567	393	7	0.0178117	Adenocarcinoma, NOS
6	NC_000006.12	H2AC4	8335	CCDS4574.1	-	26033175	26033567	393	11	0.0279898	Squamous cell carcinoma, NOS
6	NC_000006.12	H2AC4	8335	CCDS4574.1	-	26033175	26033567	393	3	0.00763359	Infiltrating duct carcinoma, NOS
6	NC_000006.12	H2AC4	8335	CCDS4574.1	-	26033175	26033567	393	5	0.0127226	Multiple myeloma
6	NC_000006.12	H2AC4	8335	CCDS4574.1	-	26033175	26033567	393	4	0.0101781	Glioblastoma
6	NC_000006.12	H2AC4	8335	CCDS4574.1	-	26033175	26033567	393	2	0.00508906	Serous cystadenocarcinoma, NOS
6	NC_000006.12	H2AC4	8335	CCDS4574.1	-	26033175	26033567	393	0	0	Papillary adenocarcinoma, NOS
6	NC_000006.12	H2AC4	8335	CCDS4574.1	-	26033175	26033567	393	0	0	Clear cell adenocarcinoma, NOS
6	NC_000006.12	H2AC4	8335	CCDS4574.1	-	26033175	26033567	393	6	0.0152672	Endometrioid adenocarcinoma, NOS
6	NC_000006.12	H2AC4	8335	CCDS4574.1	-	26033175	26033567	393	2	0.00508906	Malignant melanoma, NOS
6	NC_000006.12	H2AC4	8335	CCDS4574.1	-	26033175	26033567	393	0	0	Hepatocellular carcinoma, NOS
6	NC_000006.12	H2AC4	8335	CCDS4574.1	-	26033175	26033567	393	2	0.00508906	Transitional cell carcinoma
6	NC_000006.12	H2AC4	8335	CCDS4574.1	-	26033175	26033567	393	0	0	Lobular carcinoma, NOS
6	NC_000006.12	H2AC4	8335	CCDS4574.1	-	26033175	26033567	393	0	0	Acute myeloid leukemia, NOS
6	NC_000006.12	H2AC4	8335	CCDS4574.1	-	26033175	26033567	393	2	0.00508906	Mucinous adenocarcinoma
6	NC_000006.12	H2AC4	8335	CCDS4574.1	-	26033175	26033567	393	0	0	Mixed glioma
6	NC_000006.12	H2AC4	8335	CCDS4574.1	-	26033175	26033567	393	1	0.00254453	Astrocytoma, anaplastic
6	NC_000006.12	H2AC4	8335	CCDS4574.1	-	26033175	26033567	393	0	0	Renal cell carcinoma, NOS
6	NC_000006.12	H2AC4	8335	CCDS4574.1	-	26033175	26033567	393	1	0.00254453	Adenocarcinoma with mixed subtypes
6	NC_000006.12	H2AC4	8335	CCDS4574.1	-	26033175	26033567	393	0	0	Renal cell carcinoma, chromophobe type
6	NC_000006.12	H2AC4	8335	CCDS4574.1	-	26033175	26033567	393	0	0	Oligodendroglioma, NOS
6	NC_000006.12	H2AC4	8335	CCDS4574.1	-	26033175	26033567	393	1	0.00254453	Squamous cell carcinoma, keratinizing, NOS
6	NC_000006.12	H2AC4	8335	CCDS4574.1	-	26033175	26033567	393	0	0	Papillary carcinoma, follicular variant
6	NC_000006.12	H2AC4	8335	CCDS4574.1	-	26033175	26033567	393	1	0.00254453	Serous adenocarcinoma, NOS
6	NC_000006.12	H2AC4	8335	CCDS4574.1	-	26033175	26033567	393	0	0	Leiomyosarcoma, NOS
6	NC_000006.12	H2AC4	8335	CCDS4574.1	-	26033175	26033567	393	0	0	Adenocarcinoma, intestinal type
6	NC_000006.12	H2AC4	8335	CCDS4574.1	-	26033175	26033567	393	0	0	Adrenal cortical carcinoma
6	NC_000006.12	H2AC4	8335	CCDS4574.1	-	26033175	26033567	393	0	0	Tubular adenocarcinoma
6	NC_000006.12	H2AC4	8335	CCDS4574.1	-	26033175	26033567	393	0	0	Oligodendroglioma, anaplastic
6	NC_000006.12	H2AC4	8335	CCDS4574.1	-	26033175	26033567	393	0	0	Carcinoma, diffuse type
6	NC_000006.12	H2AC4	8335	CCDS4574.1	-	26033175	26033567	393	0	0	Papillary transitional cell carcinoma
6	NC_000006.12	H2AC4	8335	CCDS4574.1	-	26033175	26033567	393	0	0	Seminoma, NOS
6	NC_000006.12	H2AC4	8335	CCDS4574.1	-	26033175	26033567	393	0	0	Squamous cell carcinoma, large cell, nonkeratinizing, NOS
6	NC_000006.12	H2AC4	8335	CCDS4574.1	-	26033175	26033567	393	0	0	Astrocytoma, NOS
6	NC_000006.12	H2AC4	8335	CCDS4574.1	-	26033175	26033567	393	0	0	Dedifferentiated liposarcoma
6	NC_000006.12	H2AC4	8335	CCDS4574.1	-	26033175	26033567	393	0	0	Epithelioid mesothelioma, malignant
6	NC_000006.12	H2AC4	8335	CCDS4574.1	-	26033175	26033567	393	0	0	Cholangiocarcinoma
6	NC_000006.12	H2AC4	8335	CCDS4574.1	-	26033175	26033567	393	0	0	Malignant lymphoma, large B-cell, diffuse, NOS
6	NC_000006.12	H2AC4	8335	CCDS4574.1	-	26033175	26033567	393	1	0.00254453	Mullerian mixed tumor
6	NC_000006.12	H2AC4	8335	CCDS4574.1	-	26033175	26033567	393	0	0	Mixed epithelioid and spindle cell melanoma
6	NC_000006.12	H2AC4	8335	CCDS4574.1	-	26033175	26033567	393	0	0	Pheochromocytoma, malignant
6	NC_000006.12	H2AC4	8335	CCDS4574.1	-	26033175	26033567	393	0	0	Papillary carcinoma, columnar cell
6	NC_000006.12	H2AC4	8335	CCDS4574.1	-	26033175	26033567	393	0	0	Undifferentiated sarcoma
6	NC_000006.12	H2AC4	8335	CCDS4574.1	-	26033175	26033567	393	0	0	Thymoma, type AB, malignant
6	NC_000006.12	H2AC4	8335	CCDS4574.1	-	26033175	26033567	393	0	0	Infiltrating duct and lobular carcinoma
6	NC_000006.12	H2AC4	8335	CCDS4574.1	-	26033175	26033567	393	0	0	Mixed germ cell tumor
6	NC_000006.12	H2AC4	8335	CCDS4574.1	-	26033175	26033567	393	0	0	Basaloid squamous cell carcinoma
6	NC_000006.12	H2AC4	8335	CCDS4574.1	-	26033175	26033567	393	0	0	Thymoma, type B2, malignant
6	NC_000006.12	H2AC4	8335	CCDS4574.1	-	26033175	26033567	393	0	0	Embryonal carcinoma, NOS
6	NC_000006.12	H2AC4	8335	CCDS4574.1	-	26033175	26033567	393	0	0	Fibromyxosarcoma
6	NC_000006.12	H2AC4	8335	CCDS4574.1	-	26033175	26033567	393	0	0	Spindle cell melanoma, NOS
6	NC_000006.12	H2AC4	8335	CCDS4574.1	-	26033175	26033567	393	0	0	Acinar cell carcinoma
6	NC_000006.12	H2AC4	8335	CCDS4574.1	-	26033175	26033567	393	0	0	Mesothelioma, biphasic, malignant
6	NC_000006.12	H2AC4	8335	CCDS4574.1	-	26033175	26033567	393	1	0.00254453	Adenocarcinoma, endocervical type
6	NC_000006.12	H2AC4	8335	CCDS4574.1	-	26033175	26033567	393	0	0	Nodular melanoma
6	NC_000006.12	H2AC4	8335	CCDS4574.1	-	26033175	26033567	393	0	0	Epithelioid cell melanoma
6	NC_000006.12	H2AC4	8335	CCDS4574.1	-	26033175	26033567	393	0	0	Infiltrating duct mixed with other types of carcinoma
6	NC_000006.12	H2AC4	8335	CCDS4574.1	-	26033175	26033567	393	0	0	Bronchiolo-alveolar carcinoma, non-mucinous
6	NC_000006.12	H2AC4	8335	CCDS4574.1	-	26033175	26033567	393	0	0	Mucinous adenocarcinoma, endocervical type
6	NC_000006.12	H2AC4	8335	CCDS4574.1	-	26033175	26033567	393	0	0	Metaplastic carcinoma, NOS
6	NC_000006.12	H2AC4	8335	CCDS4574.1	-	26033175	26033567	393	0	0	Signet ring cell carcinoma
6	NC_000006.12	H2AC4	8335	CCDS4574.1	-	26033175	26033567	393	0	0	Thymoma, type A, malignant
6	NC_000006.12	H2AC4	8335	CCDS4574.1	-	26033175	26033567	393	0	0	Thymoma, type B3, malignant
6	NC_000006.12	H2AC4	8335	CCDS4574.1	-	26033175	26033567	393	0	0	Thymoma, type B1, malignant
6	NC_000006.12	H2AC4	8335	CCDS4574.1	-	26033175	26033567	393	0	0	Malignant fibrous histiocytoma
6	NC_000006.12	H2AC4	8335	CCDS4574.1	-	26033175	26033567	393	0	0	Infiltrating lobular carcinoma, NOS
6	NC_000006.12	H2AC4	8335	CCDS4574.1	-	26033175	26033567	393	1	0.00254453	Carcinosarcoma, NOS
6	NC_000006.12	H2AC4	8335	CCDS4574.1	-	26033175	26033567	393	0	0	Thymic carcinoma, NOS
1	NC_000001.11	H4C15	554313	CCDS30851.1	-	149860819	149861130	312	0	0	Pancancer
1	NC_000001.11	H4C15	554313	CCDS30851.1	-	149860819	149861130	312	0	0	Adenocarcinoma, NOS
1	NC_000001.11	H4C15	554313	CCDS30851.1	-	149860819	149861130	312	0	0	Squamous cell carcinoma, NOS
1	NC_000001.11	H4C15	554313	CCDS30851.1	-	149860819	149861130	312	0	0	Infiltrating duct carcinoma, NOS
1	NC_000001.11	H4C15	554313	CCDS30851.1	-	149860819	149861130	312	0	0	Multiple myeloma
1	NC_000001.11	H4C15	554313	CCDS30851.1	-	149860819	149861130	312	0	0	Glioblastoma
1	NC_000001.11	H4C15	554313	CCDS30851.1	-	149860819	149861130	312	0	0	Serous cystadenocarcinoma, NOS
1	NC_000001.11	H4C15	554313	CCDS30851.1	-	149860819	149861130	312	0	0	Papillary adenocarcinoma, NOS
1	NC_000001.11	H4C15	554313	CCDS30851.1	-	149860819	149861130	312	0	0	Clear cell adenocarcinoma, NOS
1	NC_000001.11	H4C15	554313	CCDS30851.1	-	149860819	149861130	312	0	0	Endometrioid adenocarcinoma, NOS
1	NC_000001.11	H4C15	554313	CCDS30851.1	-	149860819	149861130	312	0	0	Malignant melanoma, NOS
1	NC_000001.11	H4C15	554313	CCDS30851.1	-	149860819	149861130	312	0	0	Hepatocellular carcinoma, NOS
1	NC_000001.11	H4C15	554313	CCDS30851.1	-	149860819	149861130	312	0	0	Transitional cell carcinoma
1	NC_000001.11	H4C15	554313	CCDS30851.1	-	149860819	149861130	312	0	0	Lobular carcinoma, NOS
1	NC_000001.11	H4C15	554313	CCDS30851.1	-	149860819	149861130	312	0	0	Acute myeloid leukemia, NOS
1	NC_000001.11	H4C15	554313	CCDS30851.1	-	149860819	149861130	312	0	0	Mucinous adenocarcinoma
1	NC_000001.11	H4C15	554313	CCDS30851.1	-	149860819	149861130	312	0	0	Mixed glioma
1	NC_000001.11	H4C15	554313	CCDS30851.1	-	149860819	149861130	312	0	0	Astrocytoma, anaplastic
1	NC_000001.11	H4C15	554313	CCDS30851.1	-	149860819	149861130	312	0	0	Renal cell carcinoma, NOS
1	NC_000001.11	H4C15	554313	CCDS30851.1	-	149860819	149861130	312	0	0	Adenocarcinoma with mixed subtypes
1	NC_000001.11	H4C15	554313	CCDS30851.1	-	149860819	149861130	312	0	0	Renal cell carcinoma, chromophobe type
1	NC_000001.11	H4C15	554313	CCDS30851.1	-	149860819	149861130	312	0	0	Oligodendroglioma, NOS
1	NC_000001.11	H4C15	554313	CCDS30851.1	-	149860819	149861130	312	0	0	Squamous cell carcinoma, keratinizing, NOS
1	NC_000001.11	H4C15	554313	CCDS30851.1	-	149860819	149861130	312	0	0	Papillary carcinoma, follicular variant
1	NC_000001.11	H4C15	554313	CCDS30851.1	-	149860819	149861130	312	0	0	Serous adenocarcinoma, NOS
1	NC_000001.11	H4C15	554313	CCDS30851.1	-	149860819	149861130	312	0	0	Leiomyosarcoma, NOS
1	NC_000001.11	H4C15	554313	CCDS30851.1	-	149860819	149861130	312	0	0	Adenocarcinoma, intestinal type
1	NC_000001.11	H4C15	554313	CCDS30851.1	-	149860819	149861130	312	0	0	Adrenal cortical carcinoma
1	NC_000001.11	H4C15	554313	CCDS30851.1	-	149860819	149861130	312	0	0	Tubular adenocarcinoma
1	NC_000001.11	H4C15	554313	CCDS30851.1	-	149860819	149861130	312	0	0	Oligodendroglioma, anaplastic
1	NC_000001.11	H4C15	554313	CCDS30851.1	-	149860819	149861130	312	0	0	Carcinoma, diffuse type
1	NC_000001.11	H4C15	554313	CCDS30851.1	-	149860819	149861130	312	0	0	Papillary transitional cell carcinoma
1	NC_000001.11	H4C15	554313	CCDS30851.1	-	149860819	149861130	312	0	0	Seminoma, NOS
1	NC_000001.11	H4C15	554313	CCDS30851.1	-	149860819	149861130	312	0	0	Squamous cell carcinoma, large cell, nonkeratinizing, NOS
1	NC_000001.11	H4C15	554313	CCDS30851.1	-	149860819	149861130	312	0	0	Astrocytoma, NOS
1	NC_000001.11	H4C15	554313	CCDS30851.1	-	149860819	149861130	312	0	0	Dedifferentiated liposarcoma
1	NC_000001.11	H4C15	554313	CCDS30851.1	-	149860819	149861130	312	0	0	Epithelioid mesothelioma, malignant
1	NC_000001.11	H4C15	554313	CCDS30851.1	-	149860819	149861130	312	0	0	Cholangiocarcinoma
1	NC_000001.11	H4C15	554313	CCDS30851.1	-	149860819	149861130	312	0	0	Malignant lymphoma, large B-cell, diffuse, NOS
1	NC_000001.11	H4C15	554313	CCDS30851.1	-	149860819	149861130	312	0	0	Mullerian mixed tumor
1	NC_000001.11	H4C15	554313	CCDS30851.1	-	149860819	149861130	312	0	0	Mixed epithelioid and spindle cell melanoma
1	NC_000001.11	H4C15	554313	CCDS30851.1	-	149860819	149861130	312	0	0	Pheochromocytoma, malignant
1	NC_000001.11	H4C15	554313	CCDS30851.1	-	149860819	149861130	312	0	0	Papillary carcinoma, columnar cell
1	NC_000001.11	H4C15	554313	CCDS30851.1	-	149860819	149861130	312	0	0	Undifferentiated sarcoma
1	NC_000001.11	H4C15	554313	CCDS30851.1	-	149860819	149861130	312	0	0	Thymoma, type AB, malignant
1	NC_000001.11	H4C15	554313	CCDS30851.1	-	149860819	149861130	312	0	0	Infiltrating duct and lobular carcinoma
1	NC_000001.11	H4C15	554313	CCDS30851.1	-	149860819	149861130	312	0	0	Mixed germ cell tumor
1	NC_000001.11	H4C15	554313	CCDS30851.1	-	149860819	149861130	312	0	0	Basaloid squamous cell carcinoma
1	NC_000001.11	H4C15	554313	CCDS30851.1	-	149860819	149861130	312	0	0	Thymoma, type B2, malignant
1	NC_000001.11	H4C15	554313	CCDS30851.1	-	149860819	149861130	312	0	0	Embryonal carcinoma, NOS
1	NC_000001.11	H4C15	554313	CCDS30851.1	-	149860819	149861130	312	0	0	Fibromyxosarcoma
1	NC_000001.11	H4C15	554313	CCDS30851.1	-	149860819	149861130	312	0	0	Spindle cell melanoma, NOS
1	NC_000001.11	H4C15	554313	CCDS30851.1	-	149860819	149861130	312	0	0	Acinar cell carcinoma
1	NC_000001.11	H4C15	554313	CCDS30851.1	-	149860819	149861130	312	0	0	Mesothelioma, biphasic, malignant
1	NC_000001.11	H4C15	554313	CCDS30851.1	-	149860819	149861130	312	0	0	Adenocarcinoma, endocervical type
1	NC_000001.11	H4C15	554313	CCDS30851.1	-	149860819	149861130	312	0	0	Nodular melanoma
1	NC_000001.11	H4C15	554313	CCDS30851.1	-	149860819	149861130	312	0	0	Epithelioid cell melanoma
1	NC_000001.11	H4C15	554313	CCDS30851.1	-	149860819	149861130	312	0	0	Infiltrating duct mixed with other types of carcinoma
1	NC_000001.11	H4C15	554313	CCDS30851.1	-	149860819	149861130	312	0	0	Bronchiolo-alveolar carcinoma, non-mucinous
1	NC_000001.11	H4C15	554313	CCDS30851.1	-	149860819	149861130	312	0	0	Mucinous adenocarcinoma, endocervical type
1	NC_000001.11	H4C15	554313	CCDS30851.1	-	149860819	149861130	312	0	0	Metaplastic carcinoma, NOS
1	NC_000001.11	H4C15	554313	CCDS30851.1	-	149860819	149861130	312	0	0	Signet ring cell carcinoma
1	NC_000001.11	H4C15	554313	CCDS30851.1	-	149860819	149861130	312	0	0	Thymoma, type A, malignant
1	NC_000001.11	H4C15	554313	CCDS30851.1	-	149860819	149861130	312	0	0	Thymoma, type B3, malignant
1	NC_000001.11	H4C15	554313	CCDS30851.1	-	149860819	149861130	312	0	0	Thymoma, type B1, malignant
1	NC_000001.11	H4C15	554313	CCDS30851.1	-	149860819	149861130	312	0	0	Malignant fibrous histiocytoma
1	NC_000001.11	H4C15	554313	CCDS30851.1	-	149860819	149861130	312	0	0	Infiltrating lobular carcinoma, NOS
1	NC_000001.11	H4C15	554313	CCDS30851.1	-	149860819	149861130	312	0	0	Carcinosarcoma, NOS
1	NC_000001.11	H4C15	554313	CCDS30851.1	-	149860819	149861130	312	0	0	Thymic carcinoma, NOS
1	NC_000001.11	H2AC18	8337	CCDS934.1	-	149842305	149842697	393	0	0	Pancancer
1	NC_000001.11	H2AC18	8337	CCDS934.1	-	149842305	149842697	393	0	0	Adenocarcinoma, NOS
1	NC_000001.11	H2AC18	8337	CCDS934.1	-	149842305	149842697	393	0	0	Squamous cell carcinoma, NOS
1	NC_000001.11	H2AC18	8337	CCDS934.1	-	149842305	149842697	393	0	0	Infiltrating duct carcinoma, NOS
1	NC_000001.11	H2AC18	8337	CCDS934.1	-	149842305	149842697	393	0	0	Multiple myeloma
1	NC_000001.11	H2AC18	8337	CCDS934.1	-	149842305	149842697	393	0	0	Glioblastoma
1	NC_000001.11	H2AC18	8337	CCDS934.1	-	149842305	149842697	393	0	0	Serous cystadenocarcinoma, NOS
1	NC_000001.11	H2AC18	8337	CCDS934.1	-	149842305	149842697	393	0	0	Papillary adenocarcinoma, NOS
1	NC_000001.11	H2AC18	8337	CCDS934.1	-	149842305	149842697	393	0	0	Clear cell adenocarcinoma, NOS
1	NC_000001.11	H2AC18	8337	CCDS934.1	-	149842305	149842697	393	0	0	Endometrioid adenocarcinoma, NOS
1	NC_000001.11	H2AC18	8337	CCDS934.1	-	149842305	149842697	393	0	0	Malignant melanoma, NOS
1	NC_000001.11	H2AC18	8337	CCDS934.1	-	149842305	149842697	393	0	0	Hepatocellular carcinoma, NOS
1	NC_000001.11	H2AC18	8337	CCDS934.1	-	149842305	149842697	393	0	0	Transitional cell carcinoma
1	NC_000001.11	H2AC18	8337	CCDS934.1	-	149842305	149842697	393	0	0	Lobular carcinoma, NOS
1	NC_000001.11	H2AC18	8337	CCDS934.1	-	149842305	149842697	393	0	0	Acute myeloid leukemia, NOS
1	NC_000001.11	H2AC18	8337	CCDS934.1	-	149842305	149842697	393	0	0	Mucinous adenocarcinoma
1	NC_000001.11	H2AC18	8337	CCDS934.1	-	149842305	149842697	393	0	0	Mixed glioma
1	NC_000001.11	H2AC18	8337	CCDS934.1	-	149842305	149842697	393	0	0	Astrocytoma, anaplastic
1	NC_000001.11	H2AC18	8337	CCDS934.1	-	149842305	149842697	393	0	0	Renal cell carcinoma, NOS
1	NC_000001.11	H2AC18	8337	CCDS934.1	-	149842305	149842697	393	0	0	Adenocarcinoma with mixed subtypes
1	NC_000001.11	H2AC18	8337	CCDS934.1	-	149842305	149842697	393	0	0	Renal cell carcinoma, chromophobe type
1	NC_000001.11	H2AC18	8337	CCDS934.1	-	149842305	149842697	393	0	0	Oligodendroglioma, NOS
1	NC_000001.11	H2AC18	8337	CCDS934.1	-	149842305	149842697	393	0	0	Squamous cell carcinoma, keratinizing, NOS
1	NC_000001.11	H2AC18	8337	CCDS934.1	-	149842305	149842697	393	0	0	Papillary carcinoma, follicular variant
1	NC_000001.11	H2AC18	8337	CCDS934.1	-	149842305	149842697	393	0	0	Serous adenocarcinoma, NOS
1	NC_000001.11	H2AC18	8337	CCDS934.1	-	149842305	149842697	393	0	0	Leiomyosarcoma, NOS
1	NC_000001.11	H2AC18	8337	CCDS934.1	-	149842305	149842697	393	0	0	Adenocarcinoma, intestinal type
1	NC_000001.11	H2AC18	8337	CCDS934.1	-	149842305	149842697	393	0	0	Adrenal cortical carcinoma
1	NC_000001.11	H2AC18	8337	CCDS934.1	-	149842305	149842697	393	0	0	Tubular adenocarcinoma
1	NC_000001.11	H2AC18	8337	CCDS934.1	-	149842305	149842697	393	0	0	Oligodendroglioma, anaplastic
1	NC_000001.11	H2AC18	8337	CCDS934.1	-	149842305	149842697	393	0	0	Carcinoma, diffuse type
1	NC_000001.11	H2AC18	8337	CCDS934.1	-	149842305	149842697	393	0	0	Papillary transitional cell carcinoma
1	NC_000001.11	H2AC18	8337	CCDS934.1	-	149842305	149842697	393	0	0	Seminoma, NOS
1	NC_000001.11	H2AC18	8337	CCDS934.1	-	149842305	149842697	393	0	0	Squamous cell carcinoma, large cell, nonkeratinizing, NOS
1	NC_000001.11	H2AC18	8337	CCDS934.1	-	149842305	149842697	393	0	0	Astrocytoma, NOS
1	NC_000001.11	H2AC18	8337	CCDS934.1	-	149842305	149842697	393	0	0	Dedifferentiated liposarcoma
1	NC_000001.11	H2AC18	8337	CCDS934.1	-	149842305	149842697	393	0	0	Epithelioid mesothelioma, malignant
1	NC_000001.11	H2AC18	8337	CCDS934.1	-	149842305	149842697	393	0	0	Cholangiocarcinoma
1	NC_000001.11	H2AC18	8337	CCDS934.1	-	149842305	149842697	393	0	0	Malignant lymphoma, large B-cell, diffuse, NOS
1	NC_000001.11	H2AC18	8337	CCDS934.1	-	149842305	149842697	393	0	0	Mullerian mixed tumor
1	NC_000001.11	H2AC18	8337	CCDS934.1	-	149842305	149842697	393	0	0	Mixed epithelioid and spindle cell melanoma
1	NC_000001.11	H2AC18	8337	CCDS934.1	-	149842305	149842697	393	0	0	Pheochromocytoma, malignant
1	NC_000001.11	H2AC18	8337	CCDS934.1	-	149842305	149842697	393	0	0	Papillary carcinoma, columnar cell
1	NC_000001.11	H2AC18	8337	CCDS934.1	-	149842305	149842697	393	0	0	Undifferentiated sarcoma
1	NC_000001.11	H2AC18	8337	CCDS934.1	-	149842305	149842697	393	0	0	Thymoma, type AB, malignant
1	NC_000001.11	H2AC18	8337	CCDS934.1	-	149842305	149842697	393	0	0	Infiltrating duct and lobular carcinoma
1	NC_000001.11	H2AC18	8337	CCDS934.1	-	149842305	149842697	393	0	0	Mixed germ cell tumor
1	NC_000001.11	H2AC18	8337	CCDS934.1	-	149842305	149842697	393	0	0	Basaloid squamous cell carcinoma
1	NC_000001.11	H2AC18	8337	CCDS934.1	-	149842305	149842697	393	0	0	Thymoma, type B2, malignant
1	NC_000001.11	H2AC18	8337	CCDS934.1	-	149842305	149842697	393	0	0	Embryonal carcinoma, NOS
1	NC_000001.11	H2AC18	8337	CCDS934.1	-	149842305	149842697	393	0	0	Fibromyxosarcoma
1	NC_000001.11	H2AC18	8337	CCDS934.1	-	149842305	149842697	393	0	0	Spindle cell melanoma, NOS
1	NC_000001.11	H2AC18	8337	CCDS934.1	-	149842305	149842697	393	0	0	Acinar cell carcinoma
1	NC_000001.11	H2AC18	8337	CCDS934.1	-	149842305	149842697	393	0	0	Mesothelioma, biphasic, malignant
1	NC_000001.11	H2AC18	8337	CCDS934.1	-	149842305	149842697	393	0	0	Adenocarcinoma, endocervical type
1	NC_000001.11	H2AC18	8337	CCDS934.1	-	149842305	149842697	393	0	0	Nodular melanoma
1	NC_000001.11	H2AC18	8337	CCDS934.1	-	149842305	149842697	393	0	0	Epithelioid cell melanoma
1	NC_000001.11	H2AC18	8337	CCDS934.1	-	149842305	149842697	393	0	0	Infiltrating duct mixed with other types of carcinoma
1	NC_000001.11	H2AC18	8337	CCDS934.1	-	149842305	149842697	393	0	0	Bronchiolo-alveolar carcinoma, non-mucinous
1	NC_000001.11	H2AC18	8337	CCDS934.1	-	149842305	149842697	393	0	0	Mucinous adenocarcinoma, endocervical type
1	NC_000001.11	H2AC18	8337	CCDS934.1	-	149842305	149842697	393	0	0	Metaplastic carcinoma, NOS
1	NC_000001.11	H2AC18	8337	CCDS934.1	-	149842305	149842697	393	0	0	Signet ring cell carcinoma
1	NC_000001.11	H2AC18	8337	CCDS934.1	-	149842305	149842697	393	0	0	Thymoma, type A, malignant
1	NC_000001.11	H2AC18	8337	CCDS934.1	-	149842305	149842697	393	0	0	Thymoma, type B3, malignant
1	NC_000001.11	H2AC18	8337	CCDS934.1	-	149842305	149842697	393	0	0	Thymoma, type B1, malignant
1	NC_000001.11	H2AC18	8337	CCDS934.1	-	149842305	149842697	393	0	0	Malignant fibrous histiocytoma
1	NC_000001.11	H2AC18	8337	CCDS934.1	-	149842305	149842697	393	0	0	Infiltrating lobular carcinoma, NOS
1	NC_000001.11	H2AC18	8337	CCDS934.1	-	149842305	149842697	393	0	0	Carcinosarcoma, NOS
1	NC_000001.11	H2AC18	8337	CCDS934.1	-	149842305	149842697	393	0	0	Thymic carcinoma, NOS
6	NC_000006.12	H1-3	3007	CCDS4597.1	-	26234267	26234932	666	109	0.163664	Pancancer
6	NC_000006.12	H1-3	3007	CCDS4597.1	-	26234267	26234932	666	11	0.0165165	Adenocarcinoma, NOS
6	NC_000006.12	H1-3	3007	CCDS4597.1	-	26234267	26234932	666	15	0.0225225	Squamous cell carcinoma, NOS
6	NC_000006.12	H1-3	3007	CCDS4597.1	-	26234267	26234932	666	6	0.00900901	Infiltrating duct carcinoma, NOS
6	NC_000006.12	H1-3	3007	CCDS4597.1	-	26234267	26234932	666	20	0.03003	Multiple myeloma
6	NC_000006.12	H1-3	3007	CCDS4597.1	-	26234267	26234932	666	1	0.0015015	Glioblastoma
6	NC_000006.12	H1-3	3007	CCDS4597.1	-	26234267	26234932	666	2	0.003003	Serous cystadenocarcinoma, NOS
6	NC_000006.12	H1-3	3007	CCDS4597.1	-	26234267	26234932	666	0	0	Papillary adenocarcinoma, NOS
6	NC_000006.12	H1-3	3007	CCDS4597.1	-	26234267	26234932	666	0	0	Clear cell adenocarcinoma, NOS
6	NC_000006.12	H1-3	3007	CCDS4597.1	-	26234267	26234932	666	14	0.021021	Endometrioid adenocarcinoma, NOS
6	NC_000006.12	H1-3	3007	CCDS4597.1	-	26234267	26234932	666	7	0.0105105	Malignant melanoma, NOS
6	NC_000006.12	H1-3	3007	CCDS4597.1	-	26234267	26234932	666	0	0	Hepatocellular carcinoma, NOS
6	NC_000006.12	H1-3	3007	CCDS4597.1	-	26234267	26234932	666	4	0.00600601	Transitional cell carcinoma
6	NC_000006.12	H1-3	3007	CCDS4597.1	-	26234267	26234932	666	0	0	Lobular carcinoma, NOS
6	NC_000006.12	H1-3	3007	CCDS4597.1	-	26234267	26234932	666	0	0	Acute myeloid leukemia, NOS
6	NC_000006.12	H1-3	3007	CCDS4597.1	-	26234267	26234932	666	4	0.00600601	Mucinous adenocarcinoma
6	NC_000006.12	H1-3	3007	CCDS4597.1	-	26234267	26234932	666	0	0	Mixed glioma
6	NC_000006.12	H1-3	3007	CCDS4597.1	-	26234267	26234932	666	1	0.0015015	Astrocytoma, anaplastic
6	NC_000006.12	H1-3	3007	CCDS4597.1	-	26234267	26234932	666	0	0	Renal cell carcinoma, NOS
6	NC_000006.12	H1-3	3007	CCDS4597.1	-	26234267	26234932	666	2	0.003003	Adenocarcinoma with mixed subtypes
6	NC_000006.12	H1-3	3007	CCDS4597.1	-	26234267	26234932	666	0	0	Renal cell carcinoma, chromophobe type
6	NC_000006.12	H1-3	3007	CCDS4597.1	-	26234267	26234932	666	0	0	Oligodendroglioma, NOS
6	NC_000006.12	H1-3	3007	CCDS4597.1	-	26234267	26234932	666	1	0.0015015	Squamous cell carcinoma, keratinizing, NOS
6	NC_000006.12	H1-3	3007	CCDS4597.1	-	26234267	26234932	666	0	0	Papillary carcinoma, follicular variant
6	NC_000006.12	H1-3	3007	CCDS4597.1	-	26234267	26234932	666	2	0.003003	Serous adenocarcinoma, NOS
6	NC_000006.12	H1-3	3007	CCDS4597.1	-	26234267	26234932	666	0	0	Leiomyosarcoma, NOS
6	NC_000006.12	H1-3	3007	CCDS4597.1	-	26234267	26234932	666	2	0.003003	Adenocarcinoma, intestinal type
6	NC_000006.12	H1-3	3007	CCDS4597.1	-	26234267	26234932	666	0	0	Adrenal cortical carcinoma
6	NC_000006.12	H1-3	3007	CCDS4597.1	-	26234267	26234932	666	0	0	Tubular adenocarcinoma
6	NC_000006.12	H1-3	3007	CCDS4597.1	-	26234267	26234932	666	0	0	Oligodendroglioma, anaplastic
6	NC_000006.12	H1-3	3007	CCDS4597.1	-	26234267	26234932	666	2	0.003003	Carcinoma, diffuse type
6	NC_000006.12	H1-3	3007	CCDS4597.1	-	26234267	26234932	666	1	0.0015015	Papillary transitional cell carcinoma
6	NC_000006.12	H1-3	3007	CCDS4597.1	-	26234267	26234932	666	0	0	Seminoma, NOS
6	NC_000006.12	H1-3	3007	CCDS4597.1	-	26234267	26234932	666	1	0.0015015	Squamous cell carcinoma, large cell, nonkeratinizing, NOS
6	NC_000006.12	H1-3	3007	CCDS4597.1	-	26234267	26234932	666	0	0	Astrocytoma, NOS
6	NC_000006.12	H1-3	3007	CCDS4597.1	-	26234267	26234932	666	0	0	Dedifferentiated liposarcoma
6	NC_000006.12	H1-3	3007	CCDS4597.1	-	26234267	26234932	666	1	0.0015015	Epithelioid mesothelioma, malignant
6	NC_000006.12	H1-3	3007	CCDS4597.1	-	26234267	26234932	666	0	0	Cholangiocarcinoma
6	NC_000006.12	H1-3	3007	CCDS4597.1	-	26234267	26234932	666	7	0.0105105	Malignant lymphoma, large B-cell, diffuse, NOS
6	NC_000006.12	H1-3	3007	CCDS4597.1	-	26234267	26234932	666	0	0	Mullerian mixed tumor
6	NC_000006.12	H1-3	3007	CCDS4597.1	-	26234267	26234932	666	0	0	Mixed epithelioid and spindle cell melanoma
6	NC_000006.12	H1-3	3007	CCDS4597.1	-	26234267	26234932	666	0	0	Pheochromocytoma, malignant
6	NC_000006.12	H1-3	3007	CCDS4597.1	-	26234267	26234932	666	0	0	Papillary carcinoma, columnar cell
6	NC_000006.12	H1-3	3007	CCDS4597.1	-	26234267	26234932	666	0	0	Undifferentiated sarcoma
6	NC_000006.12	H1-3	3007	CCDS4597.1	-	26234267	26234932	666	0	0	Thymoma, type AB, malignant
6	NC_000006.12	H1-3	3007	CCDS4597.1	-	26234267	26234932	666	1	0.0015015	Infiltrating duct and lobular carcinoma
6	NC_000006.12	H1-3	3007	CCDS4597.1	-	26234267	26234932	666	0	0	Mixed germ cell tumor
6	NC_000006.12	H1-3	3007	CCDS4597.1	-	26234267	26234932	666	0	0	Basaloid squamous cell carcinoma
6	NC_000006.12	H1-3	3007	CCDS4597.1	-	26234267	26234932	666	0	0	Thymoma, type B2, malignant
6	NC_000006.12	H1-3	3007	CCDS4597.1	-	26234267	26234932	666	0	0	Embryonal carcinoma, NOS
6	NC_000006.12	H1-3	3007	CCDS4597.1	-	26234267	26234932	666	0	0	Fibromyxosarcoma
6	NC_000006.12	H1-3	3007	CCDS4597.1	-	26234267	26234932	666	0	0	Spindle cell melanoma, NOS
6	NC_000006.12	H1-3	3007	CCDS4597.1	-	26234267	26234932	666	0	0	Acinar cell carcinoma
6	NC_000006.12	H1-3	3007	CCDS4597.1	-	26234267	26234932	666	0	0	Mesothelioma, biphasic, malignant
6	NC_000006.12	H1-3	3007	CCDS4597.1	-	26234267	26234932	666	0	0	Adenocarcinoma, endocervical type
6	NC_000006.12	H1-3	3007	CCDS4597.1	-	26234267	26234932	666	0	0	Nodular melanoma
6	NC_000006.12	H1-3	3007	CCDS4597.1	-	26234267	26234932	666	0	0	Epithelioid cell melanoma
6	NC_000006.12	H1-3	3007	CCDS4597.1	-	26234267	26234932	666	0	0	Infiltrating duct mixed with other types of carcinoma
6	NC_000006.12	H1-3	3007	CCDS4597.1	-	26234267	26234932	666	0	0	Bronchiolo-alveolar carcinoma, non-mucinous
6	NC_000006.12	H1-3	3007	CCDS4597.1	-	26234267	26234932	666	0	0	Mucinous adenocarcinoma, endocervical type
6	NC_000006.12	H1-3	3007	CCDS4597.1	-	26234267	26234932	666	0	0	Metaplastic carcinoma, NOS
6	NC_000006.12	H1-3	3007	CCDS4597.1	-	26234267	26234932	666	0	0	Signet ring cell carcinoma
6	NC_000006.12	H1-3	3007	CCDS4597.1	-	26234267	26234932	666	0	0	Thymoma, type A, malignant
6	NC_000006.12	H1-3	3007	CCDS4597.1	-	26234267	26234932	666	0	0	Thymoma, type B3, malignant
6	NC_000006.12	H1-3	3007	CCDS4597.1	-	26234267	26234932	666	0	0	Thymoma, type B1, malignant
6	NC_000006.12	H1-3	3007	CCDS4597.1	-	26234267	26234932	666	0	0	Malignant fibrous histiocytoma
6	NC_000006.12	H1-3	3007	CCDS4597.1	-	26234267	26234932	666	0	0	Infiltrating lobular carcinoma, NOS
6	NC_000006.12	H1-3	3007	CCDS4597.1	-	26234267	26234932	666	0	0	Carcinosarcoma, NOS
6	NC_000006.12	H1-3	3007	CCDS4597.1	-	26234267	26234932	666	0	0	Thymic carcinoma, NOS
6	NC_000006.12	H3C11	8354	CCDS4636.1	-	27871904	27872314	411	91	0.221411	Pancancer
6	NC_000006.12	H3C11	8354	CCDS4636.1	-	27871904	27872314	411	12	0.0291971	Adenocarcinoma, NOS
6	NC_000006.12	H3C11	8354	CCDS4636.1	-	27871904	27872314	411	19	0.0462287	Squamous cell carcinoma, NOS
6	NC_000006.12	H3C11	8354	CCDS4636.1	-	27871904	27872314	411	6	0.0145985	Infiltrating duct carcinoma, NOS
6	NC_000006.12	H3C11	8354	CCDS4636.1	-	27871904	27872314	411	10	0.0243309	Multiple myeloma
6	NC_000006.12	H3C11	8354	CCDS4636.1	-	27871904	27872314	411	2	0.00486618	Glioblastoma
6	NC_000006.12	H3C11	8354	CCDS4636.1	-	27871904	27872314	411	3	0.00729927	Serous cystadenocarcinoma, NOS
6	NC_000006.12	H3C11	8354	CCDS4636.1	-	27871904	27872314	411	0	0	Papillary adenocarcinoma, NOS
6	NC_000006.12	H3C11	8354	CCDS4636.1	-	27871904	27872314	411	0	0	Clear cell adenocarcinoma, NOS
6	NC_000006.12	H3C11	8354	CCDS4636.1	-	27871904	27872314	411	17	0.0413625	Endometrioid adenocarcinoma, NOS
6	NC_000006.12	H3C11	8354	CCDS4636.1	-	27871904	27872314	411	1	0.00243309	Malignant melanoma, NOS
6	NC_000006.12	H3C11	8354	CCDS4636.1	-	27871904	27872314	411	4	0.00973236	Hepatocellular carcinoma, NOS
6	NC_000006.12	H3C11	8354	CCDS4636.1	-	27871904	27872314	411	5	0.0121655	Transitional cell carcinoma
6	NC_000006.12	H3C11	8354	CCDS4636.1	-	27871904	27872314	411	0	0	Lobular carcinoma, NOS
6	NC_000006.12	H3C11	8354	CCDS4636.1	-	27871904	27872314	411	0	0	Acute myeloid leukemia, NOS
6	NC_000006.12	H3C11	8354	CCDS4636.1	-	27871904	27872314	411	3	0.00729927	Mucinous adenocarcinoma
6	NC_000006.12	H3C11	8354	CCDS4636.1	-	27871904	27872314	411	0	0	Mixed glioma
6	NC_000006.12	H3C11	8354	CCDS4636.1	-	27871904	27872314	411	1	0.00243309	Astrocytoma, anaplastic
6	NC_000006.12	H3C11	8354	CCDS4636.1	-	27871904	27872314	411	0	0	Renal cell carcinoma, NOS
6	NC_000006.12	H3C11	8354	CCDS4636.1	-	27871904	27872314	411	1	0.00243309	Adenocarcinoma with mixed subtypes
6	NC_000006.12	H3C11	8354	CCDS4636.1	-	27871904	27872314	411	0	0	Renal cell carcinoma, chromophobe type
6	NC_000006.12	H3C11	8354	CCDS4636.1	-	27871904	27872314	411	0	0	Oligodendroglioma, NOS
6	NC_000006.12	H3C11	8354	CCDS4636.1	-	27871904	27872314	411	0	0	Squamous cell carcinoma, keratinizing, NOS
6	NC_000006.12	H3C11	8354	CCDS4636.1	-	27871904	27872314	411	0	0	Papillary carcinoma, follicular variant
6	NC_000006.12	H3C11	8354	CCDS4636.1	-	27871904	27872314	411	0	0	Serous adenocarcinoma, NOS
6	NC_000006.12	H3C11	8354	CCDS4636.1	-	27871904	27872314	411	0	0	Leiomyosarcoma, NOS
6	NC_000006.12	H3C11	8354	CCDS4636.1	-	27871904	27872314	411	0	0	Adenocarcinoma, intestinal type
6	NC_000006.12	H3C11	8354	CCDS4636.1	-	27871904	27872314	411	0	0	Adrenal cortical carcinoma
6	NC_000006.12	H3C11	8354	CCDS4636.1	-	27871904	27872314	411	2	0.00486618	Tubular adenocarcinoma
6	NC_000006.12	H3C11	8354	CCDS4636.1	-	27871904	27872314	411	0	0	Oligodendroglioma, anaplastic
6	NC_000006.12	H3C11	8354	CCDS4636.1	-	27871904	27872314	411	1	0.00243309	Carcinoma, diffuse type
6	NC_000006.12	H3C11	8354	CCDS4636.1	-	27871904	27872314	411	1	0.00243309	Papillary transitional cell carcinoma
6	NC_000006.12	H3C11	8354	CCDS4636.1	-	27871904	27872314	411	0	0	Seminoma, NOS
6	NC_000006.12	H3C11	8354	CCDS4636.1	-	27871904	27872314	411	0	0	Squamous cell carcinoma, large cell, nonkeratinizing, NOS
6	NC_000006.12	H3C11	8354	CCDS4636.1	-	27871904	27872314	411	0	0	Astrocytoma, NOS
6	NC_000006.12	H3C11	8354	CCDS4636.1	-	27871904	27872314	411	0	0	Dedifferentiated liposarcoma
6	NC_000006.12	H3C11	8354	CCDS4636.1	-	27871904	27872314	411	0	0	Epithelioid mesothelioma, malignant
6	NC_000006.12	H3C11	8354	CCDS4636.1	-	27871904	27872314	411	0	0	Cholangiocarcinoma
6	NC_000006.12	H3C11	8354	CCDS4636.1	-	27871904	27872314	411	1	0.00243309	Malignant lymphoma, large B-cell, diffuse, NOS
6	NC_000006.12	H3C11	8354	CCDS4636.1	-	27871904	27872314	411	0	0	Mullerian mixed tumor
6	NC_000006.12	H3C11	8354	CCDS4636.1	-	27871904	27872314	411	0	0	Mixed epithelioid and spindle cell melanoma
6	NC_000006.12	H3C11	8354	CCDS4636.1	-	27871904	27872314	411	0	0	Pheochromocytoma, malignant
6	NC_000006.12	H3C11	8354	CCDS4636.1	-	27871904	27872314	411	0	0	Papillary carcinoma, columnar cell
6	NC_000006.12	H3C11	8354	CCDS4636.1	-	27871904	27872314	411	0	0	Undifferentiated sarcoma
6	NC_000006.12	H3C11	8354	CCDS4636.1	-	27871904	27872314	411	0	0	Thymoma, type AB, malignant
6	NC_000006.12	H3C11	8354	CCDS4636.1	-	27871904	27872314	411	0	0	Infiltrating duct and lobular carcinoma
6	NC_000006.12	H3C11	8354	CCDS4636.1	-	27871904	27872314	411	0	0	Mixed germ cell tumor
6	NC_000006.12	H3C11	8354	CCDS4636.1	-	27871904	27872314	411	2	0.00486618	Basaloid squamous cell carcinoma
6	NC_000006.12	H3C11	8354	CCDS4636.1	-	27871904	27872314	411	0	0	Thymoma, type B2, malignant
6	NC_000006.12	H3C11	8354	CCDS4636.1	-	27871904	27872314	411	0	0	Embryonal carcinoma, NOS
6	NC_000006.12	H3C11	8354	CCDS4636.1	-	27871904	27872314	411	0	0	Fibromyxosarcoma
6	NC_000006.12	H3C11	8354	CCDS4636.1	-	27871904	27872314	411	0	0	Spindle cell melanoma, NOS
6	NC_000006.12	H3C11	8354	CCDS4636.1	-	27871904	27872314	411	0	0	Acinar cell carcinoma
6	NC_000006.12	H3C11	8354	CCDS4636.1	-	27871904	27872314	411	0	0	Mesothelioma, biphasic, malignant
6	NC_000006.12	H3C11	8354	CCDS4636.1	-	27871904	27872314	411	0	0	Adenocarcinoma, endocervical type
6	NC_000006.12	H3C11	8354	CCDS4636.1	-	27871904	27872314	411	0	0	Nodular melanoma
6	NC_000006.12	H3C11	8354	CCDS4636.1	-	27871904	27872314	411	0	0	Epithelioid cell melanoma
6	NC_000006.12	H3C11	8354	CCDS4636.1	-	27871904	27872314	411	0	0	Infiltrating duct mixed with other types of carcinoma
6	NC_000006.12	H3C11	8354	CCDS4636.1	-	27871904	27872314	411	0	0	Bronchiolo-alveolar carcinoma, non-mucinous
6	NC_000006.12	H3C11	8354	CCDS4636.1	-	27871904	27872314	411	0	0	Mucinous adenocarcinoma, endocervical type
6	NC_000006.12	H3C11	8354	CCDS4636.1	-	27871904	27872314	411	0	0	Metaplastic carcinoma, NOS
6	NC_000006.12	H3C11	8354	CCDS4636.1	-	27871904	27872314	411	0	0	Signet ring cell carcinoma
6	NC_000006.12	H3C11	8354	CCDS4636.1	-	27871904	27872314	411	0	0	Thymoma, type A, malignant
6	NC_000006.12	H3C11	8354	CCDS4636.1	-	27871904	27872314	411	0	0	Thymoma, type B3, malignant
6	NC_000006.12	H3C11	8354	CCDS4636.1	-	27871904	27872314	411	0	0	Thymoma, type B1, malignant
6	NC_000006.12	H3C11	8354	CCDS4636.1	-	27871904	27872314	411	0	0	Malignant fibrous histiocytoma
6	NC_000006.12	H3C11	8354	CCDS4636.1	-	27871904	27872314	411	0	0	Infiltrating lobular carcinoma, NOS
6	NC_000006.12	H3C11	8354	CCDS4636.1	-	27871904	27872314	411	0	0	Carcinosarcoma, NOS
6	NC_000006.12	H3C11	8354	CCDS4636.1	-	27871904	27872314	411	0	0	Thymic carcinoma, NOS
1	NC_000001.11	H2AC19	723790	CCDS30849.1	+	149851113	149851505	393	0	0	Pancancer
1	NC_000001.11	H2AC19	723790	CCDS30849.1	+	149851113	149851505	393	0	0	Adenocarcinoma, NOS
1	NC_000001.11	H2AC19	723790	CCDS30849.1	+	149851113	149851505	393	0	0	Squamous cell carcinoma, NOS
1	NC_000001.11	H2AC19	723790	CCDS30849.1	+	149851113	149851505	393	0	0	Infiltrating duct carcinoma, NOS
1	NC_000001.11	H2AC19	723790	CCDS30849.1	+	149851113	149851505	393	0	0	Multiple myeloma
1	NC_000001.11	H2AC19	723790	CCDS30849.1	+	149851113	149851505	393	0	0	Glioblastoma
1	NC_000001.11	H2AC19	723790	CCDS30849.1	+	149851113	149851505	393	0	0	Serous cystadenocarcinoma, NOS
1	NC_000001.11	H2AC19	723790	CCDS30849.1	+	149851113	149851505	393	0	0	Papillary adenocarcinoma, NOS
1	NC_000001.11	H2AC19	723790	CCDS30849.1	+	149851113	149851505	393	0	0	Clear cell adenocarcinoma, NOS
1	NC_000001.11	H2AC19	723790	CCDS30849.1	+	149851113	149851505	393	0	0	Endometrioid adenocarcinoma, NOS
1	NC_000001.11	H2AC19	723790	CCDS30849.1	+	149851113	149851505	393	0	0	Malignant melanoma, NOS
1	NC_000001.11	H2AC19	723790	CCDS30849.1	+	149851113	149851505	393	0	0	Hepatocellular carcinoma, NOS
1	NC_000001.11	H2AC19	723790	CCDS30849.1	+	149851113	149851505	393	0	0	Transitional cell carcinoma
1	NC_000001.11	H2AC19	723790	CCDS30849.1	+	149851113	149851505	393	0	0	Lobular carcinoma, NOS
1	NC_000001.11	H2AC19	723790	CCDS30849.1	+	149851113	149851505	393	0	0	Acute myeloid leukemia, NOS
1	NC_000001.11	H2AC19	723790	CCDS30849.1	+	149851113	149851505	393	0	0	Mucinous adenocarcinoma
1	NC_000001.11	H2AC19	723790	CCDS30849.1	+	149851113	149851505	393	0	0	Mixed glioma
1	NC_000001.11	H2AC19	723790	CCDS30849.1	+	149851113	149851505	393	0	0	Astrocytoma, anaplastic
1	NC_000001.11	H2AC19	723790	CCDS30849.1	+	149851113	149851505	393	0	0	Renal cell carcinoma, NOS
1	NC_000001.11	H2AC19	723790	CCDS30849.1	+	149851113	149851505	393	0	0	Adenocarcinoma with mixed subtypes
1	NC_000001.11	H2AC19	723790	CCDS30849.1	+	149851113	149851505	393	0	0	Renal cell carcinoma, chromophobe type
1	NC_000001.11	H2AC19	723790	CCDS30849.1	+	149851113	149851505	393	0	0	Oligodendroglioma, NOS
1	NC_000001.11	H2AC19	723790	CCDS30849.1	+	149851113	149851505	393	0	0	Squamous cell carcinoma, keratinizing, NOS
1	NC_000001.11	H2AC19	723790	CCDS30849.1	+	149851113	149851505	393	0	0	Papillary carcinoma, follicular variant
1	NC_000001.11	H2AC19	723790	CCDS30849.1	+	149851113	149851505	393	0	0	Serous adenocarcinoma, NOS
1	NC_000001.11	H2AC19	723790	CCDS30849.1	+	149851113	149851505	393	0	0	Leiomyosarcoma, NOS
1	NC_000001.11	H2AC19	723790	CCDS30849.1	+	149851113	149851505	393	0	0	Adenocarcinoma, intestinal type
1	NC_000001.11	H2AC19	723790	CCDS30849.1	+	149851113	149851505	393	0	0	Adrenal cortical carcinoma
1	NC_000001.11	H2AC19	723790	CCDS30849.1	+	149851113	149851505	393	0	0	Tubular adenocarcinoma
1	NC_000001.11	H2AC19	723790	CCDS30849.1	+	149851113	149851505	393	0	0	Oligodendroglioma, anaplastic
1	NC_000001.11	H2AC19	723790	CCDS30849.1	+	149851113	149851505	393	0	0	Carcinoma, diffuse type
1	NC_000001.11	H2AC19	723790	CCDS30849.1	+	149851113	149851505	393	0	0	Papillary transitional cell carcinoma
1	NC_000001.11	H2AC19	723790	CCDS30849.1	+	149851113	149851505	393	0	0	Seminoma, NOS
1	NC_000001.11	H2AC19	723790	CCDS30849.1	+	149851113	149851505	393	0	0	Squamous cell carcinoma, large cell, nonkeratinizing, NOS
1	NC_000001.11	H2AC19	723790	CCDS30849.1	+	149851113	149851505	393	0	0	Astrocytoma, NOS
1	NC_000001.11	H2AC19	723790	CCDS30849.1	+	149851113	149851505	393	0	0	Dedifferentiated liposarcoma
1	NC_000001.11	H2AC19	723790	CCDS30849.1	+	149851113	149851505	393	0	0	Epithelioid mesothelioma, malignant
1	NC_000001.11	H2AC19	723790	CCDS30849.1	+	149851113	149851505	393	0	0	Cholangiocarcinoma
1	NC_000001.11	H2AC19	723790	CCDS30849.1	+	149851113	149851505	393	0	0	Malignant lymphoma, large B-cell, diffuse, NOS
1	NC_000001.11	H2AC19	723790	CCDS30849.1	+	149851113	149851505	393	0	0	Mullerian mixed tumor
1	NC_000001.11	H2AC19	723790	CCDS30849.1	+	149851113	149851505	393	0	0	Mixed epithelioid and spindle cell melanoma
1	NC_000001.11	H2AC19	723790	CCDS30849.1	+	149851113	149851505	393	0	0	Pheochromocytoma, malignant
1	NC_000001.11	H2AC19	723790	CCDS30849.1	+	149851113	149851505	393	0	0	Papillary carcinoma, columnar cell
1	NC_000001.11	H2AC19	723790	CCDS30849.1	+	149851113	149851505	393	0	0	Undifferentiated sarcoma
1	NC_000001.11	H2AC19	723790	CCDS30849.1	+	149851113	149851505	393	0	0	Thymoma, type AB, malignant
1	NC_000001.11	H2AC19	723790	CCDS30849.1	+	149851113	149851505	393	0	0	Infiltrating duct and lobular carcinoma
1	NC_000001.11	H2AC19	723790	CCDS30849.1	+	149851113	149851505	393	0	0	Mixed germ cell tumor
1	NC_000001.11	H2AC19	723790	CCDS30849.1	+	149851113	149851505	393	0	0	Basaloid squamous cell carcinoma
1	NC_000001.11	H2AC19	723790	CCDS30849.1	+	149851113	149851505	393	0	0	Thymoma, type B2, malignant
1	NC_000001.11	H2AC19	723790	CCDS30849.1	+	149851113	149851505	393	0	0	Embryonal carcinoma, NOS
1	NC_000001.11	H2AC19	723790	CCDS30849.1	+	149851113	149851505	393	0	0	Fibromyxosarcoma
1	NC_000001.11	H2AC19	723790	CCDS30849.1	+	149851113	149851505	393	0	0	Spindle cell melanoma, NOS
1	NC_000001.11	H2AC19	723790	CCDS30849.1	+	149851113	149851505	393	0	0	Acinar cell carcinoma
1	NC_000001.11	H2AC19	723790	CCDS30849.1	+	149851113	149851505	393	0	0	Mesothelioma, biphasic, malignant
1	NC_000001.11	H2AC19	723790	CCDS30849.1	+	149851113	149851505	393	0	0	Adenocarcinoma, endocervical type
1	NC_000001.11	H2AC19	723790	CCDS30849.1	+	149851113	149851505	393	0	0	Nodular melanoma
1	NC_000001.11	H2AC19	723790	CCDS30849.1	+	149851113	149851505	393	0	0	Epithelioid cell melanoma
1	NC_000001.11	H2AC19	723790	CCDS30849.1	+	149851113	149851505	393	0	0	Infiltrating duct mixed with other types of carcinoma
1	NC_000001.11	H2AC19	723790	CCDS30849.1	+	149851113	149851505	393	0	0	Bronchiolo-alveolar carcinoma, non-mucinous
1	NC_000001.11	H2AC19	723790	CCDS30849.1	+	149851113	149851505	393	0	0	Mucinous adenocarcinoma, endocervical type
1	NC_000001.11	H2AC19	723790	CCDS30849.1	+	149851113	149851505	393	0	0	Metaplastic carcinoma, NOS
1	NC_000001.11	H2AC19	723790	CCDS30849.1	+	149851113	149851505	393	0	0	Signet ring cell carcinoma
1	NC_000001.11	H2AC19	723790	CCDS30849.1	+	149851113	149851505	393	0	0	Thymoma, type A, malignant
1	NC_000001.11	H2AC19	723790	CCDS30849.1	+	149851113	149851505	393	0	0	Thymoma, type B3, malignant
1	NC_000001.11	H2AC19	723790	CCDS30849.1	+	149851113	149851505	393	0	0	Thymoma, type B1, malignant
1	NC_000001.11	H2AC19	723790	CCDS30849.1	+	149851113	149851505	393	0	0	Malignant fibrous histiocytoma
1	NC_000001.11	H2AC19	723790	CCDS30849.1	+	149851113	149851505	393	0	0	Infiltrating lobular carcinoma, NOS
1	NC_000001.11	H2AC19	723790	CCDS30849.1	+	149851113	149851505	393	0	0	Carcinosarcoma, NOS
1	NC_000001.11	H2AC19	723790	CCDS30849.1	+	149851113	149851505	393	0	0	Thymic carcinoma, NOS
6	NC_000006.12	H1-5	3009	CCDS4635.1	-	27866848	27867528	681	137	0.201175	Pancancer
6	NC_000006.12	H1-5	3009	CCDS4635.1	-	27866848	27867528	681	24	0.0352423	Adenocarcinoma, NOS
6	NC_000006.12	H1-5	3009	CCDS4635.1	-	27866848	27867528	681	17	0.0249633	Squamous cell carcinoma, NOS
6	NC_000006.12	H1-5	3009	CCDS4635.1	-	27866848	27867528	681	4	0.00587372	Infiltrating duct carcinoma, NOS
6	NC_000006.12	H1-5	3009	CCDS4635.1	-	27866848	27867528	681	14	0.020558	Multiple myeloma
6	NC_000006.12	H1-5	3009	CCDS4635.1	-	27866848	27867528	681	1	0.00146843	Glioblastoma
6	NC_000006.12	H1-5	3009	CCDS4635.1	-	27866848	27867528	681	4	0.00587372	Serous cystadenocarcinoma, NOS
6	NC_000006.12	H1-5	3009	CCDS4635.1	-	27866848	27867528	681	1	0.00146843	Papillary adenocarcinoma, NOS
6	NC_000006.12	H1-5	3009	CCDS4635.1	-	27866848	27867528	681	0	0	Clear cell adenocarcinoma, NOS
6	NC_000006.12	H1-5	3009	CCDS4635.1	-	27866848	27867528	681	17	0.0249633	Endometrioid adenocarcinoma, NOS
6	NC_000006.12	H1-5	3009	CCDS4635.1	-	27866848	27867528	681	17	0.0249633	Malignant melanoma, NOS
6	NC_000006.12	H1-5	3009	CCDS4635.1	-	27866848	27867528	681	1	0.00146843	Hepatocellular carcinoma, NOS
6	NC_000006.12	H1-5	3009	CCDS4635.1	-	27866848	27867528	681	7	0.010279	Transitional cell carcinoma
6	NC_000006.12	H1-5	3009	CCDS4635.1	-	27866848	27867528	681	0	0	Lobular carcinoma, NOS
6	NC_000006.12	H1-5	3009	CCDS4635.1	-	27866848	27867528	681	0	0	Acute myeloid leukemia, NOS
6	NC_000006.12	H1-5	3009	CCDS4635.1	-	27866848	27867528	681	5	0.00734214	Mucinous adenocarcinoma
6	NC_000006.12	H1-5	3009	CCDS4635.1	-	27866848	27867528	681	0	0	Mixed glioma
6	NC_000006.12	H1-5	3009	CCDS4635.1	-	27866848	27867528	681	0	0	Astrocytoma, anaplastic
6	NC_000006.12	H1-5	3009	CCDS4635.1	-	27866848	27867528	681	0	0	Renal cell carcinoma, NOS
6	NC_000006.12	H1-5	3009	CCDS4635.1	-	27866848	27867528	681	2	0.00293686	Adenocarcinoma with mixed subtypes
6	NC_000006.12	H1-5	3009	CCDS4635.1	-	27866848	27867528	681	0	0	Renal cell carcinoma, chromophobe type
6	NC_000006.12	H1-5	3009	CCDS4635.1	-	27866848	27867528	681	0	0	Oligodendroglioma, NOS
6	NC_000006.12	H1-5	3009	CCDS4635.1	-	27866848	27867528	681	2	0.00293686	Squamous cell carcinoma, keratinizing, NOS
6	NC_000006.12	H1-5	3009	CCDS4635.1	-	27866848	27867528	681	0	0	Papillary carcinoma, follicular variant
6	NC_000006.12	H1-5	3009	CCDS4635.1	-	27866848	27867528	681	0	0	Serous adenocarcinoma, NOS
6	NC_000006.12	H1-5	3009	CCDS4635.1	-	27866848	27867528	681	0	0	Leiomyosarcoma, NOS
6	NC_000006.12	H1-5	3009	CCDS4635.1	-	27866848	27867528	681	3	0.00440529	Adenocarcinoma, intestinal type
6	NC_000006.12	H1-5	3009	CCDS4635.1	-	27866848	27867528	681	0	0	Adrenal cortical carcinoma
6	NC_000006.12	H1-5	3009	CCDS4635.1	-	27866848	27867528	681	3	0.00440529	Tubular adenocarcinoma
6	NC_000006.12	H1-5	3009	CCDS4635.1	-	27866848	27867528	681	0	0	Oligodendroglioma, anaplastic
6	NC_000006.12	H1-5	3009	CCDS4635.1	-	27866848	27867528	681	0	0	Carcinoma, diffuse type
6	NC_000006.12	H1-5	3009	CCDS4635.1	-	27866848	27867528	681	2	0.00293686	Papillary transitional cell carcinoma
6	NC_000006.12	H1-5	3009	CCDS4635.1	-	27866848	27867528	681	0	0	Seminoma, NOS
6	NC_000006.12	H1-5	3009	CCDS4635.1	-	27866848	27867528	681	2	0.00293686	Squamous cell carcinoma, large cell, nonkeratinizing, NOS
6	NC_000006.12	H1-5	3009	CCDS4635.1	-	27866848	27867528	681	0	0	Astrocytoma, NOS
6	NC_000006.12	H1-5	3009	CCDS4635.1	-	27866848	27867528	681	0	0	Dedifferentiated liposarcoma
6	NC_000006.12	H1-5	3009	CCDS4635.1	-	27866848	27867528	681	0	0	Epithelioid mesothelioma, malignant
6	NC_000006.12	H1-5	3009	CCDS4635.1	-	27866848	27867528	681	0	0	Cholangiocarcinoma
6	NC_000006.12	H1-5	3009	CCDS4635.1	-	27866848	27867528	681	3	0.00440529	Malignant lymphoma, large B-cell, diffuse, NOS
6	NC_000006.12	H1-5	3009	CCDS4635.1	-	27866848	27867528	681	0	0	Mullerian mixed tumor
6	NC_000006.12	H1-5	3009	CCDS4635.1	-	27866848	27867528	681	0	0	Mixed epithelioid and spindle cell melanoma
6	NC_000006.12	H1-5	3009	CCDS4635.1	-	27866848	27867528	681	0	0	Pheochromocytoma, malignant
6	NC_000006.12	H1-5	3009	CCDS4635.1	-	27866848	27867528	681	0	0	Papillary carcinoma, columnar cell
6	NC_000006.12	H1-5	3009	CCDS4635.1	-	27866848	27867528	681	0	0	Undifferentiated sarcoma
6	NC_000006.12	H1-5	3009	CCDS4635.1	-	27866848	27867528	681	0	0	Thymoma, type AB, malignant
6	NC_000006.12	H1-5	3009	CCDS4635.1	-	27866848	27867528	681	0	0	Infiltrating duct and lobular carcinoma
6	NC_000006.12	H1-5	3009	CCDS4635.1	-	27866848	27867528	681	0	0	Mixed germ cell tumor
6	NC_000006.12	H1-5	3009	CCDS4635.1	-	27866848	27867528	681	1	0.00146843	Basaloid squamous cell carcinoma
6	NC_000006.12	H1-5	3009	CCDS4635.1	-	27866848	27867528	681	0	0	Thymoma, type B2, malignant
6	NC_000006.12	H1-5	3009	CCDS4635.1	-	27866848	27867528	681	1	0.00146843	Embryonal carcinoma, NOS
6	NC_000006.12	H1-5	3009	CCDS4635.1	-	27866848	27867528	681	0	0	Fibromyxosarcoma
6	NC_000006.12	H1-5	3009	CCDS4635.1	-	27866848	27867528	681	0	0	Spindle cell melanoma, NOS
6	NC_000006.12	H1-5	3009	CCDS4635.1	-	27866848	27867528	681	0	0	Acinar cell carcinoma
6	NC_000006.12	H1-5	3009	CCDS4635.1	-	27866848	27867528	681	0	0	Mesothelioma, biphasic, malignant
6	NC_000006.12	H1-5	3009	CCDS4635.1	-	27866848	27867528	681	2	0.00293686	Adenocarcinoma, endocervical type
6	NC_000006.12	H1-5	3009	CCDS4635.1	-	27866848	27867528	681	0	0	Nodular melanoma
6	NC_000006.12	H1-5	3009	CCDS4635.1	-	27866848	27867528	681	0	0	Epithelioid cell melanoma
6	NC_000006.12	H1-5	3009	CCDS4635.1	-	27866848	27867528	681	0	0	Infiltrating duct mixed with other types of carcinoma
6	NC_000006.12	H1-5	3009	CCDS4635.1	-	27866848	27867528	681	0	0	Bronchiolo-alveolar carcinoma, non-mucinous
6	NC_000006.12	H1-5	3009	CCDS4635.1	-	27866848	27867528	681	0	0	Mucinous adenocarcinoma, endocervical type
6	NC_000006.12	H1-5	3009	CCDS4635.1	-	27866848	27867528	681	0	0	Metaplastic carcinoma, NOS
6	NC_000006.12	H1-5	3009	CCDS4635.1	-	27866848	27867528	681	1	0.00146843	Signet ring cell carcinoma
6	NC_000006.12	H1-5	3009	CCDS4635.1	-	27866848	27867528	681	0	0	Thymoma, type A, malignant
6	NC_000006.12	H1-5	3009	CCDS4635.1	-	27866848	27867528	681	0	0	Thymoma, type B3, malignant
6	NC_000006.12	H1-5	3009	CCDS4635.1	-	27866848	27867528	681	0	0	Thymoma, type B1, malignant
6	NC_000006.12	H1-5	3009	CCDS4635.1	-	27866848	27867528	681	1	0.00146843	Malignant fibrous histiocytoma
6	NC_000006.12	H1-5	3009	CCDS4635.1	-	27866848	27867528	681	0	0	Infiltrating lobular carcinoma, NOS
6	NC_000006.12	H1-5	3009	CCDS4635.1	-	27866848	27867528	681	1	0.00146843	Carcinosarcoma, NOS
6	NC_000006.12	H1-5	3009	CCDS4635.1	-	27866848	27867528	681	0	0	Thymic carcinoma, NOS
6	NC_000006.12	H4C3	8364	CCDS4583.1	+	26103947	26104258	312	48	0.153846	Pancancer
6	NC_000006.12	H4C3	8364	CCDS4583.1	+	26103947	26104258	312	9	0.0288462	Adenocarcinoma, NOS
6	NC_000006.12	H4C3	8364	CCDS4583.1	+	26103947	26104258	312	10	0.0320513	Squamous cell carcinoma, NOS
6	NC_000006.12	H4C3	8364	CCDS4583.1	+	26103947	26104258	312	3	0.00961538	Infiltrating duct carcinoma, NOS
6	NC_000006.12	H4C3	8364	CCDS4583.1	+	26103947	26104258	312	2	0.00641026	Multiple myeloma
6	NC_000006.12	H4C3	8364	CCDS4583.1	+	26103947	26104258	312	1	0.00320513	Glioblastoma
6	NC_000006.12	H4C3	8364	CCDS4583.1	+	26103947	26104258	312	2	0.00641026	Serous cystadenocarcinoma, NOS
6	NC_000006.12	H4C3	8364	CCDS4583.1	+	26103947	26104258	312	1	0.00320513	Papillary adenocarcinoma, NOS
6	NC_000006.12	H4C3	8364	CCDS4583.1	+	26103947	26104258	312	1	0.00320513	Clear cell adenocarcinoma, NOS
6	NC_000006.12	H4C3	8364	CCDS4583.1	+	26103947	26104258	312	2	0.00641026	Endometrioid adenocarcinoma, NOS
6	NC_000006.12	H4C3	8364	CCDS4583.1	+	26103947	26104258	312	4	0.0128205	Malignant melanoma, NOS
6	NC_000006.12	H4C3	8364	CCDS4583.1	+	26103947	26104258	312	4	0.0128205	Hepatocellular carcinoma, NOS
6	NC_000006.12	H4C3	8364	CCDS4583.1	+	26103947	26104258	312	3	0.00961538	Transitional cell carcinoma
6	NC_000006.12	H4C3	8364	CCDS4583.1	+	26103947	26104258	312	0	0	Lobular carcinoma, NOS
6	NC_000006.12	H4C3	8364	CCDS4583.1	+	26103947	26104258	312	0	0	Acute myeloid leukemia, NOS
6	NC_000006.12	H4C3	8364	CCDS4583.1	+	26103947	26104258	312	0	0	Mucinous adenocarcinoma
6	NC_000006.12	H4C3	8364	CCDS4583.1	+	26103947	26104258	312	0	0	Mixed glioma
6	NC_000006.12	H4C3	8364	CCDS4583.1	+	26103947	26104258	312	0	0	Astrocytoma, anaplastic
6	NC_000006.12	H4C3	8364	CCDS4583.1	+	26103947	26104258	312	0	0	Renal cell carcinoma, NOS
6	NC_000006.12	H4C3	8364	CCDS4583.1	+	26103947	26104258	312	0	0	Adenocarcinoma with mixed subtypes
6	NC_000006.12	H4C3	8364	CCDS4583.1	+	26103947	26104258	312	0	0	Renal cell carcinoma, chromophobe type
6	NC_000006.12	H4C3	8364	CCDS4583.1	+	26103947	26104258	312	0	0	Oligodendroglioma, NOS
6	NC_000006.12	H4C3	8364	CCDS4583.1	+	26103947	26104258	312	0	0	Squamous cell carcinoma, keratinizing, NOS
6	NC_000006.12	H4C3	8364	CCDS4583.1	+	26103947	26104258	312	0	0	Papillary carcinoma, follicular variant
6	NC_000006.12	H4C3	8364	CCDS4583.1	+	26103947	26104258	312	0	0	Serous adenocarcinoma, NOS
6	NC_000006.12	H4C3	8364	CCDS4583.1	+	26103947	26104258	312	1	0.00320513	Leiomyosarcoma, NOS
6	NC_000006.12	H4C3	8364	CCDS4583.1	+	26103947	26104258	312	0	0	Adenocarcinoma, intestinal type
6	NC_000006.12	H4C3	8364	CCDS4583.1	+	26103947	26104258	312	0	0	Adrenal cortical carcinoma
6	NC_000006.12	H4C3	8364	CCDS4583.1	+	26103947	26104258	312	0	0	Tubular adenocarcinoma
6	NC_000006.12	H4C3	8364	CCDS4583.1	+	26103947	26104258	312	0	0	Oligodendroglioma, anaplastic
6	NC_000006.12	H4C3	8364	CCDS4583.1	+	26103947	26104258	312	0	0	Carcinoma, diffuse type
6	NC_000006.12	H4C3	8364	CCDS4583.1	+	26103947	26104258	312	0	0	Papillary transitional cell carcinoma
6	NC_000006.12	H4C3	8364	CCDS4583.1	+	26103947	26104258	312	0	0	Seminoma, NOS
6	NC_000006.12	H4C3	8364	CCDS4583.1	+	26103947	26104258	312	0	0	Squamous cell carcinoma, large cell, nonkeratinizing, NOS
6	NC_000006.12	H4C3	8364	CCDS4583.1	+	26103947	26104258	312	0	0	Astrocytoma, NOS
6	NC_000006.12	H4C3	8364	CCDS4583.1	+	26103947	26104258	312	0	0	Dedifferentiated liposarcoma
6	NC_000006.12	H4C3	8364	CCDS4583.1	+	26103947	26104258	312	1	0.00320513	Epithelioid mesothelioma, malignant
6	NC_000006.12	H4C3	8364	CCDS4583.1	+	26103947	26104258	312	0	0	Cholangiocarcinoma
6	NC_000006.12	H4C3	8364	CCDS4583.1	+	26103947	26104258	312	0	0	Malignant lymphoma, large B-cell, diffuse, NOS
6	NC_000006.12	H4C3	8364	CCDS4583.1	+	26103947	26104258	312	0	0	Mullerian mixed tumor
6	NC_000006.12	H4C3	8364	CCDS4583.1	+	26103947	26104258	312	0	0	Mixed epithelioid and spindle cell melanoma
6	NC_000006.12	H4C3	8364	CCDS4583.1	+	26103947	26104258	312	0	0	Pheochromocytoma, malignant
6	NC_000006.12	H4C3	8364	CCDS4583.1	+	26103947	26104258	312	0	0	Papillary carcinoma, columnar cell
6	NC_000006.12	H4C3	8364	CCDS4583.1	+	26103947	26104258	312	1	0.00320513	Undifferentiated sarcoma
6	NC_000006.12	H4C3	8364	CCDS4583.1	+	26103947	26104258	312	0	0	Thymoma, type AB, malignant
6	NC_000006.12	H4C3	8364	CCDS4583.1	+	26103947	26104258	312	0	0	Infiltrating duct and lobular carcinoma
6	NC_000006.12	H4C3	8364	CCDS4583.1	+	26103947	26104258	312	0	0	Mixed germ cell tumor
6	NC_000006.12	H4C3	8364	CCDS4583.1	+	26103947	26104258	312	0	0	Basaloid squamous cell carcinoma
6	NC_000006.12	H4C3	8364	CCDS4583.1	+	26103947	26104258	312	0	0	Thymoma, type B2, malignant
6	NC_000006.12	H4C3	8364	CCDS4583.1	+	26103947	26104258	312	0	0	Embryonal carcinoma, NOS
6	NC_000006.12	H4C3	8364	CCDS4583.1	+	26103947	26104258	312	0	0	Fibromyxosarcoma
6	NC_000006.12	H4C3	8364	CCDS4583.1	+	26103947	26104258	312	0	0	Spindle cell melanoma, NOS
6	NC_000006.12	H4C3	8364	CCDS4583.1	+	26103947	26104258	312	0	0	Acinar cell carcinoma
6	NC_000006.12	H4C3	8364	CCDS4583.1	+	26103947	26104258	312	0	0	Mesothelioma, biphasic, malignant
6	NC_000006.12	H4C3	8364	CCDS4583.1	+	26103947	26104258	312	0	0	Adenocarcinoma, endocervical type
6	NC_000006.12	H4C3	8364	CCDS4583.1	+	26103947	26104258	312	0	0	Nodular melanoma
6	NC_000006.12	H4C3	8364	CCDS4583.1	+	26103947	26104258	312	1	0.00320513	Epithelioid cell melanoma
6	NC_000006.12	H4C3	8364	CCDS4583.1	+	26103947	26104258	312	0	0	Infiltrating duct mixed with other types of carcinoma
6	NC_000006.12	H4C3	8364	CCDS4583.1	+	26103947	26104258	312	0	0	Bronchiolo-alveolar carcinoma, non-mucinous
6	NC_000006.12	H4C3	8364	CCDS4583.1	+	26103947	26104258	312	1	0.00320513	Mucinous adenocarcinoma, endocervical type
6	NC_000006.12	H4C3	8364	CCDS4583.1	+	26103947	26104258	312	0	0	Metaplastic carcinoma, NOS
6	NC_000006.12	H4C3	8364	CCDS4583.1	+	26103947	26104258	312	0	0	Signet ring cell carcinoma
6	NC_000006.12	H4C3	8364	CCDS4583.1	+	26103947	26104258	312	0	0	Thymoma, type A, malignant
6	NC_000006.12	H4C3	8364	CCDS4583.1	+	26103947	26104258	312	0	0	Thymoma, type B3, malignant
6	NC_000006.12	H4C3	8364	CCDS4583.1	+	26103947	26104258	312	0	0	Thymoma, type B1, malignant
6	NC_000006.12	H4C3	8364	CCDS4583.1	+	26103947	26104258	312	0	0	Malignant fibrous histiocytoma
6	NC_000006.12	H4C3	8364	CCDS4583.1	+	26103947	26104258	312	0	0	Infiltrating lobular carcinoma, NOS
6	NC_000006.12	H4C3	8364	CCDS4583.1	+	26103947	26104258	312	1	0.00320513	Carcinosarcoma, NOS
6	NC_000006.12	H4C3	8364	CCDS4583.1	+	26103947	26104258	312	0	0	Thymic carcinoma, NOS
5	NC_000005.10	H3Y1	391769	CCDS87290.1	-	17655127	17655537	411	1	0.00243309	Pancancer
5	NC_000005.10	H3Y1	391769	CCDS87290.1	-	17655127	17655537	411	1	0.00243309	Adenocarcinoma, NOS
5	NC_000005.10	H3Y1	391769	CCDS87290.1	-	17655127	17655537	411	0	0	Squamous cell carcinoma, NOS
5	NC_000005.10	H3Y1	391769	CCDS87290.1	-	17655127	17655537	411	0	0	Infiltrating duct carcinoma, NOS
5	NC_000005.10	H3Y1	391769	CCDS87290.1	-	17655127	17655537	411	0	0	Multiple myeloma
5	NC_000005.10	H3Y1	391769	CCDS87290.1	-	17655127	17655537	411	0	0	Glioblastoma
5	NC_000005.10	H3Y1	391769	CCDS87290.1	-	17655127	17655537	411	0	0	Serous cystadenocarcinoma, NOS
5	NC_000005.10	H3Y1	391769	CCDS87290.1	-	17655127	17655537	411	0	0	Papillary adenocarcinoma, NOS
5	NC_000005.10	H3Y1	391769	CCDS87290.1	-	17655127	17655537	411	0	0	Clear cell adenocarcinoma, NOS
5	NC_000005.10	H3Y1	391769	CCDS87290.1	-	17655127	17655537	411	0	0	Endometrioid adenocarcinoma, NOS
5	NC_000005.10	H3Y1	391769	CCDS87290.1	-	17655127	17655537	411	0	0	Malignant melanoma, NOS
5	NC_000005.10	H3Y1	391769	CCDS87290.1	-	17655127	17655537	411	0	0	Hepatocellular carcinoma, NOS
5	NC_000005.10	H3Y1	391769	CCDS87290.1	-	17655127	17655537	411	0	0	Transitional cell carcinoma
5	NC_000005.10	H3Y1	391769	CCDS87290.1	-	17655127	17655537	411	0	0	Lobular carcinoma, NOS
5	NC_000005.10	H3Y1	391769	CCDS87290.1	-	17655127	17655537	411	0	0	Acute myeloid leukemia, NOS
5	NC_000005.10	H3Y1	391769	CCDS87290.1	-	17655127	17655537	411	0	0	Mucinous adenocarcinoma
5	NC_000005.10	H3Y1	391769	CCDS87290.1	-	17655127	17655537	411	0	0	Mixed glioma
5	NC_000005.10	H3Y1	391769	CCDS87290.1	-	17655127	17655537	411	0	0	Astrocytoma, anaplastic
5	NC_000005.10	H3Y1	391769	CCDS87290.1	-	17655127	17655537	411	0	0	Renal cell carcinoma, NOS
5	NC_000005.10	H3Y1	391769	CCDS87290.1	-	17655127	17655537	411	0	0	Adenocarcinoma with mixed subtypes
5	NC_000005.10	H3Y1	391769	CCDS87290.1	-	17655127	17655537	411	0	0	Renal cell carcinoma, chromophobe type
5	NC_000005.10	H3Y1	391769	CCDS87290.1	-	17655127	17655537	411	0	0	Oligodendroglioma, NOS
5	NC_000005.10	H3Y1	391769	CCDS87290.1	-	17655127	17655537	411	0	0	Squamous cell carcinoma, keratinizing, NOS
5	NC_000005.10	H3Y1	391769	CCDS87290.1	-	17655127	17655537	411	0	0	Papillary carcinoma, follicular variant
5	NC_000005.10	H3Y1	391769	CCDS87290.1	-	17655127	17655537	411	0	0	Serous adenocarcinoma, NOS
5	NC_000005.10	H3Y1	391769	CCDS87290.1	-	17655127	17655537	411	0	0	Leiomyosarcoma, NOS
5	NC_000005.10	H3Y1	391769	CCDS87290.1	-	17655127	17655537	411	0	0	Adenocarcinoma, intestinal type
5	NC_000005.10	H3Y1	391769	CCDS87290.1	-	17655127	17655537	411	0	0	Adrenal cortical carcinoma
5	NC_000005.10	H3Y1	391769	CCDS87290.1	-	17655127	17655537	411	0	0	Tubular adenocarcinoma
5	NC_000005.10	H3Y1	391769	CCDS87290.1	-	17655127	17655537	411	0	0	Oligodendroglioma, anaplastic
5	NC_000005.10	H3Y1	391769	CCDS87290.1	-	17655127	17655537	411	0	0	Carcinoma, diffuse type
5	NC_000005.10	H3Y1	391769	CCDS87290.1	-	17655127	17655537	411	0	0	Papillary transitional cell carcinoma
5	NC_000005.10	H3Y1	391769	CCDS87290.1	-	17655127	17655537	411	0	0	Seminoma, NOS
5	NC_000005.10	H3Y1	391769	CCDS87290.1	-	17655127	17655537	411	0	0	Squamous cell carcinoma, large cell, nonkeratinizing, NOS
5	NC_000005.10	H3Y1	391769	CCDS87290.1	-	17655127	17655537	411	0	0	Astrocytoma, NOS
5	NC_000005.10	H3Y1	391769	CCDS87290.1	-	17655127	17655537	411	0	0	Dedifferentiated liposarcoma
5	NC_000005.10	H3Y1	391769	CCDS87290.1	-	17655127	17655537	411	0	0	Epithelioid mesothelioma, malignant
5	NC_000005.10	H3Y1	391769	CCDS87290.1	-	17655127	17655537	411	0	0	Cholangiocarcinoma
5	NC_000005.10	H3Y1	391769	CCDS87290.1	-	17655127	17655537	411	0	0	Malignant lymphoma, large B-cell, diffuse, NOS
5	NC_000005.10	H3Y1	391769	CCDS87290.1	-	17655127	17655537	411	0	0	Mullerian mixed tumor
5	NC_000005.10	H3Y1	391769	CCDS87290.1	-	17655127	17655537	411	0	0	Mixed epithelioid and spindle cell melanoma
5	NC_000005.10	H3Y1	391769	CCDS87290.1	-	17655127	17655537	411	0	0	Pheochromocytoma, malignant
5	NC_000005.10	H3Y1	391769	CCDS87290.1	-	17655127	17655537	411	0	0	Papillary carcinoma, columnar cell
5	NC_000005.10	H3Y1	391769	CCDS87290.1	-	17655127	17655537	411	0	0	Undifferentiated sarcoma
5	NC_000005.10	H3Y1	391769	CCDS87290.1	-	17655127	17655537	411	0	0	Thymoma, type AB, malignant
5	NC_000005.10	H3Y1	391769	CCDS87290.1	-	17655127	17655537	411	0	0	Infiltrating duct and lobular carcinoma
5	NC_000005.10	H3Y1	391769	CCDS87290.1	-	17655127	17655537	411	0	0	Mixed germ cell tumor
5	NC_000005.10	H3Y1	391769	CCDS87290.1	-	17655127	17655537	411	0	0	Basaloid squamous cell carcinoma
5	NC_000005.10	H3Y1	391769	CCDS87290.1	-	17655127	17655537	411	0	0	Thymoma, type B2, malignant
5	NC_000005.10	H3Y1	391769	CCDS87290.1	-	17655127	17655537	411	0	0	Embryonal carcinoma, NOS
5	NC_000005.10	H3Y1	391769	CCDS87290.1	-	17655127	17655537	411	0	0	Fibromyxosarcoma
5	NC_000005.10	H3Y1	391769	CCDS87290.1	-	17655127	17655537	411	0	0	Spindle cell melanoma, NOS
5	NC_000005.10	H3Y1	391769	CCDS87290.1	-	17655127	17655537	411	0	0	Acinar cell carcinoma
5	NC_000005.10	H3Y1	391769	CCDS87290.1	-	17655127	17655537	411	0	0	Mesothelioma, biphasic, malignant
5	NC_000005.10	H3Y1	391769	CCDS87290.1	-	17655127	17655537	411	0	0	Adenocarcinoma, endocervical type
5	NC_000005.10	H3Y1	391769	CCDS87290.1	-	17655127	17655537	411	0	0	Nodular melanoma
5	NC_000005.10	H3Y1	391769	CCDS87290.1	-	17655127	17655537	411	0	0	Epithelioid cell melanoma
5	NC_000005.10	H3Y1	391769	CCDS87290.1	-	17655127	17655537	411	0	0	Infiltrating duct mixed with other types of carcinoma
5	NC_000005.10	H3Y1	391769	CCDS87290.1	-	17655127	17655537	411	0	0	Bronchiolo-alveolar carcinoma, non-mucinous
5	NC_000005.10	H3Y1	391769	CCDS87290.1	-	17655127	17655537	411	0	0	Mucinous adenocarcinoma, endocervical type
5	NC_000005.10	H3Y1	391769	CCDS87290.1	-	17655127	17655537	411	0	0	Metaplastic carcinoma, NOS
5	NC_000005.10	H3Y1	391769	CCDS87290.1	-	17655127	17655537	411	0	0	Signet ring cell carcinoma
5	NC_000005.10	H3Y1	391769	CCDS87290.1	-	17655127	17655537	411	0	0	Thymoma, type A, malignant
5	NC_000005.10	H3Y1	391769	CCDS87290.1	-	17655127	17655537	411	0	0	Thymoma, type B3, malignant
5	NC_000005.10	H3Y1	391769	CCDS87290.1	-	17655127	17655537	411	0	0	Thymoma, type B1, malignant
5	NC_000005.10	H3Y1	391769	CCDS87290.1	-	17655127	17655537	411	0	0	Malignant fibrous histiocytoma
5	NC_000005.10	H3Y1	391769	CCDS87290.1	-	17655127	17655537	411	0	0	Infiltrating lobular carcinoma, NOS
5	NC_000005.10	H3Y1	391769	CCDS87290.1	-	17655127	17655537	411	0	0	Carcinosarcoma, NOS
5	NC_000005.10	H3Y1	391769	CCDS87290.1	-	17655127	17655537	411	0	0	Thymic carcinoma, NOS
1	NC_000001.11	H3C14	126961	CCDS30848.1	-	149840746	149841156	411	0	0	Pancancer
1	NC_000001.11	H3C14	126961	CCDS30848.1	-	149840746	149841156	411	0	0	Adenocarcinoma, NOS
1	NC_000001.11	H3C14	126961	CCDS30848.1	-	149840746	149841156	411	0	0	Squamous cell carcinoma, NOS
1	NC_000001.11	H3C14	126961	CCDS30848.1	-	149840746	149841156	411	0	0	Infiltrating duct carcinoma, NOS
1	NC_000001.11	H3C14	126961	CCDS30848.1	-	149840746	149841156	411	0	0	Multiple myeloma
1	NC_000001.11	H3C14	126961	CCDS30848.1	-	149840746	149841156	411	0	0	Glioblastoma
1	NC_000001.11	H3C14	126961	CCDS30848.1	-	149840746	149841156	411	0	0	Serous cystadenocarcinoma, NOS
1	NC_000001.11	H3C14	126961	CCDS30848.1	-	149840746	149841156	411	0	0	Papillary adenocarcinoma, NOS
1	NC_000001.11	H3C14	126961	CCDS30848.1	-	149840746	149841156	411	0	0	Clear cell adenocarcinoma, NOS
1	NC_000001.11	H3C14	126961	CCDS30848.1	-	149840746	149841156	411	0	0	Endometrioid adenocarcinoma, NOS
1	NC_000001.11	H3C14	126961	CCDS30848.1	-	149840746	149841156	411	0	0	Malignant melanoma, NOS
1	NC_000001.11	H3C14	126961	CCDS30848.1	-	149840746	149841156	411	0	0	Hepatocellular carcinoma, NOS
1	NC_000001.11	H3C14	126961	CCDS30848.1	-	149840746	149841156	411	0	0	Transitional cell carcinoma
1	NC_000001.11	H3C14	126961	CCDS30848.1	-	149840746	149841156	411	0	0	Lobular carcinoma, NOS
1	NC_000001.11	H3C14	126961	CCDS30848.1	-	149840746	149841156	411	0	0	Acute myeloid leukemia, NOS
1	NC_000001.11	H3C14	126961	CCDS30848.1	-	149840746	149841156	411	0	0	Mucinous adenocarcinoma
1	NC_000001.11	H3C14	126961	CCDS30848.1	-	149840746	149841156	411	0	0	Mixed glioma
1	NC_000001.11	H3C14	126961	CCDS30848.1	-	149840746	149841156	411	0	0	Astrocytoma, anaplastic
1	NC_000001.11	H3C14	126961	CCDS30848.1	-	149840746	149841156	411	0	0	Renal cell carcinoma, NOS
1	NC_000001.11	H3C14	126961	CCDS30848.1	-	149840746	149841156	411	0	0	Adenocarcinoma with mixed subtypes
1	NC_000001.11	H3C14	126961	CCDS30848.1	-	149840746	149841156	411	0	0	Renal cell carcinoma, chromophobe type
1	NC_000001.11	H3C14	126961	CCDS30848.1	-	149840746	149841156	411	0	0	Oligodendroglioma, NOS
1	NC_000001.11	H3C14	126961	CCDS30848.1	-	149840746	149841156	411	0	0	Squamous cell carcinoma, keratinizing, NOS
1	NC_000001.11	H3C14	126961	CCDS30848.1	-	149840746	149841156	411	0	0	Papillary carcinoma, follicular variant
1	NC_000001.11	H3C14	126961	CCDS30848.1	-	149840746	149841156	411	0	0	Serous adenocarcinoma, NOS
1	NC_000001.11	H3C14	126961	CCDS30848.1	-	149840746	149841156	411	0	0	Leiomyosarcoma, NOS
1	NC_000001.11	H3C14	126961	CCDS30848.1	-	149840746	149841156	411	0	0	Adenocarcinoma, intestinal type
1	NC_000001.11	H3C14	126961	CCDS30848.1	-	149840746	149841156	411	0	0	Adrenal cortical carcinoma
1	NC_000001.11	H3C14	126961	CCDS30848.1	-	149840746	149841156	411	0	0	Tubular adenocarcinoma
1	NC_000001.11	H3C14	126961	CCDS30848.1	-	149840746	149841156	411	0	0	Oligodendroglioma, anaplastic
1	NC_000001.11	H3C14	126961	CCDS30848.1	-	149840746	149841156	411	0	0	Carcinoma, diffuse type
1	NC_000001.11	H3C14	126961	CCDS30848.1	-	149840746	149841156	411	0	0	Papillary transitional cell carcinoma
1	NC_000001.11	H3C14	126961	CCDS30848.1	-	149840746	149841156	411	0	0	Seminoma, NOS
1	NC_000001.11	H3C14	126961	CCDS30848.1	-	149840746	149841156	411	0	0	Squamous cell carcinoma, large cell, nonkeratinizing, NOS
1	NC_000001.11	H3C14	126961	CCDS30848.1	-	149840746	149841156	411	0	0	Astrocytoma, NOS
1	NC_000001.11	H3C14	126961	CCDS30848.1	-	149840746	149841156	411	0	0	Dedifferentiated liposarcoma
1	NC_000001.11	H3C14	126961	CCDS30848.1	-	149840746	149841156	411	0	0	Epithelioid mesothelioma, malignant
1	NC_000001.11	H3C14	126961	CCDS30848.1	-	149840746	149841156	411	0	0	Cholangiocarcinoma
1	NC_000001.11	H3C14	126961	CCDS30848.1	-	149840746	149841156	411	0	0	Malignant lymphoma, large B-cell, diffuse, NOS
1	NC_000001.11	H3C14	126961	CCDS30848.1	-	149840746	149841156	411	0	0	Mullerian mixed tumor
1	NC_000001.11	H3C14	126961	CCDS30848.1	-	149840746	149841156	411	0	0	Mixed epithelioid and spindle cell melanoma
1	NC_000001.11	H3C14	126961	CCDS30848.1	-	149840746	149841156	411	0	0	Pheochromocytoma, malignant
1	NC_000001.11	H3C14	126961	CCDS30848.1	-	149840746	149841156	411	0	0	Papillary carcinoma, columnar cell
1	NC_000001.11	H3C14	126961	CCDS30848.1	-	149840746	149841156	411	0	0	Undifferentiated sarcoma
1	NC_000001.11	H3C14	126961	CCDS30848.1	-	149840746	149841156	411	0	0	Thymoma, type AB, malignant
1	NC_000001.11	H3C14	126961	CCDS30848.1	-	149840746	149841156	411	0	0	Infiltrating duct and lobular carcinoma
1	NC_000001.11	H3C14	126961	CCDS30848.1	-	149840746	149841156	411	0	0	Mixed germ cell tumor
1	NC_000001.11	H3C14	126961	CCDS30848.1	-	149840746	149841156	411	0	0	Basaloid squamous cell carcinoma
1	NC_000001.11	H3C14	126961	CCDS30848.1	-	149840746	149841156	411	0	0	Thymoma, type B2, malignant
1	NC_000001.11	H3C14	126961	CCDS30848.1	-	149840746	149841156	411	0	0	Embryonal carcinoma, NOS
1	NC_000001.11	H3C14	126961	CCDS30848.1	-	149840746	149841156	411	0	0	Fibromyxosarcoma
1	NC_000001.11	H3C14	126961	CCDS30848.1	-	149840746	149841156	411	0	0	Spindle cell melanoma, NOS
1	NC_000001.11	H3C14	126961	CCDS30848.1	-	149840746	149841156	411	0	0	Acinar cell carcinoma
1	NC_000001.11	H3C14	126961	CCDS30848.1	-	149840746	149841156	411	0	0	Mesothelioma, biphasic, malignant
1	NC_000001.11	H3C14	126961	CCDS30848.1	-	149840746	149841156	411	0	0	Adenocarcinoma, endocervical type
1	NC_000001.11	H3C14	126961	CCDS30848.1	-	149840746	149841156	411	0	0	Nodular melanoma
1	NC_000001.11	H3C14	126961	CCDS30848.1	-	149840746	149841156	411	0	0	Epithelioid cell melanoma
1	NC_000001.11	H3C14	126961	CCDS30848.1	-	149840746	149841156	411	0	0	Infiltrating duct mixed with other types of carcinoma
1	NC_000001.11	H3C14	126961	CCDS30848.1	-	149840746	149841156	411	0	0	Bronchiolo-alveolar carcinoma, non-mucinous
1	NC_000001.11	H3C14	126961	CCDS30848.1	-	149840746	149841156	411	0	0	Mucinous adenocarcinoma, endocervical type
1	NC_000001.11	H3C14	126961	CCDS30848.1	-	149840746	149841156	411	0	0	Metaplastic carcinoma, NOS
1	NC_000001.11	H3C14	126961	CCDS30848.1	-	149840746	149841156	411	0	0	Signet ring cell carcinoma
1	NC_000001.11	H3C14	126961	CCDS30848.1	-	149840746	149841156	411	0	0	Thymoma, type A, malignant
1	NC_000001.11	H3C14	126961	CCDS30848.1	-	149840746	149841156	411	0	0	Thymoma, type B3, malignant
1	NC_000001.11	H3C14	126961	CCDS30848.1	-	149840746	149841156	411	0	0	Thymoma, type B1, malignant
1	NC_000001.11	H3C14	126961	CCDS30848.1	-	149840746	149841156	411	0	0	Malignant fibrous histiocytoma
1	NC_000001.11	H3C14	126961	CCDS30848.1	-	149840746	149841156	411	0	0	Infiltrating lobular carcinoma, NOS
1	NC_000001.11	H3C14	126961	CCDS30848.1	-	149840746	149841156	411	0	0	Carcinosarcoma, NOS
1	NC_000001.11	H3C14	126961	CCDS30848.1	-	149840746	149841156	411	0	0	Thymic carcinoma, NOS
6	NC_000006.12	H1-1	3024	CCDS4569.1	-	26017084	26017731	648	67	0.103395	Pancancer
6	NC_000006.12	H1-1	3024	CCDS4569.1	-	26017084	26017731	648	10	0.0154321	Adenocarcinoma, NOS
6	NC_000006.12	H1-1	3024	CCDS4569.1	-	26017084	26017731	648	11	0.0169753	Squamous cell carcinoma, NOS
6	NC_000006.12	H1-1	3024	CCDS4569.1	-	26017084	26017731	648	1	0.00154321	Infiltrating duct carcinoma, NOS
6	NC_000006.12	H1-1	3024	CCDS4569.1	-	26017084	26017731	648	1	0.00154321	Multiple myeloma
6	NC_000006.12	H1-1	3024	CCDS4569.1	-	26017084	26017731	648	1	0.00154321	Glioblastoma
6	NC_000006.12	H1-1	3024	CCDS4569.1	-	26017084	26017731	648	5	0.00771605	Serous cystadenocarcinoma, NOS
6	NC_000006.12	H1-1	3024	CCDS4569.1	-	26017084	26017731	648	0	0	Papillary adenocarcinoma, NOS
6	NC_000006.12	H1-1	3024	CCDS4569.1	-	26017084	26017731	648	1	0.00154321	Clear cell adenocarcinoma, NOS
6	NC_000006.12	H1-1	3024	CCDS4569.1	-	26017084	26017731	648	22	0.0339506	Endometrioid adenocarcinoma, NOS
6	NC_000006.12	H1-1	3024	CCDS4569.1	-	26017084	26017731	648	0	0	Malignant melanoma, NOS
6	NC_000006.12	H1-1	3024	CCDS4569.1	-	26017084	26017731	648	0	0	Hepatocellular carcinoma, NOS
6	NC_000006.12	H1-1	3024	CCDS4569.1	-	26017084	26017731	648	1	0.00154321	Transitional cell carcinoma
6	NC_000006.12	H1-1	3024	CCDS4569.1	-	26017084	26017731	648	0	0	Lobular carcinoma, NOS
6	NC_000006.12	H1-1	3024	CCDS4569.1	-	26017084	26017731	648	0	0	Acute myeloid leukemia, NOS
6	NC_000006.12	H1-1	3024	CCDS4569.1	-	26017084	26017731	648	5	0.00771605	Mucinous adenocarcinoma
6	NC_000006.12	H1-1	3024	CCDS4569.1	-	26017084	26017731	648	0	0	Mixed glioma
6	NC_000006.12	H1-1	3024	CCDS4569.1	-	26017084	26017731	648	0	0	Astrocytoma, anaplastic
6	NC_000006.12	H1-1	3024	CCDS4569.1	-	26017084	26017731	648	0	0	Renal cell carcinoma, NOS
6	NC_000006.12	H1-1	3024	CCDS4569.1	-	26017084	26017731	648	0	0	Adenocarcinoma with mixed subtypes
6	NC_000006.12	H1-1	3024	CCDS4569.1	-	26017084	26017731	648	0	0	Renal cell carcinoma, chromophobe type
6	NC_000006.12	H1-1	3024	CCDS4569.1	-	26017084	26017731	648	0	0	Oligodendroglioma, NOS
6	NC_000006.12	H1-1	3024	CCDS4569.1	-	26017084	26017731	648	1	0.00154321	Squamous cell carcinoma, keratinizing, NOS
6	NC_000006.12	H1-1	3024	CCDS4569.1	-	26017084	26017731	648	0	0	Papillary carcinoma, follicular variant
6	NC_000006.12	H1-1	3024	CCDS4569.1	-	26017084	26017731	648	0	0	Serous adenocarcinoma, NOS
6	NC_000006.12	H1-1	3024	CCDS4569.1	-	26017084	26017731	648	0	0	Leiomyosarcoma, NOS
6	NC_000006.12	H1-1	3024	CCDS4569.1	-	26017084	26017731	648	2	0.00308642	Adenocarcinoma, intestinal type
6	NC_000006.12	H1-1	3024	CCDS4569.1	-	26017084	26017731	648	1	0.00154321	Adrenal cortical carcinoma
6	NC_000006.12	H1-1	3024	CCDS4569.1	-	26017084	26017731	648	1	0.00154321	Tubular adenocarcinoma
6	NC_000006.12	H1-1	3024	CCDS4569.1	-	26017084	26017731	648	0	0	Oligodendroglioma, anaplastic
6	NC_000006.12	H1-1	3024	CCDS4569.1	-	26017084	26017731	648	1	0.00154321	Carcinoma, diffuse type
6	NC_000006.12	H1-1	3024	CCDS4569.1	-	26017084	26017731	648	0	0	Papillary transitional cell carcinoma
6	NC_000006.12	H1-1	3024	CCDS4569.1	-	26017084	26017731	648	0	0	Seminoma, NOS
6	NC_000006.12	H1-1	3024	CCDS4569.1	-	26017084	26017731	648	0	0	Squamous cell carcinoma, large cell, nonkeratinizing, NOS
6	NC_000006.12	H1-1	3024	CCDS4569.1	-	26017084	26017731	648	0	0	Astrocytoma, NOS
6	NC_000006.12	H1-1	3024	CCDS4569.1	-	26017084	26017731	648	0	0	Dedifferentiated liposarcoma
6	NC_000006.12	H1-1	3024	CCDS4569.1	-	26017084	26017731	648	0	0	Epithelioid mesothelioma, malignant
6	NC_000006.12	H1-1	3024	CCDS4569.1	-	26017084	26017731	648	0	0	Cholangiocarcinoma
6	NC_000006.12	H1-1	3024	CCDS4569.1	-	26017084	26017731	648	1	0.00154321	Malignant lymphoma, large B-cell, diffuse, NOS
6	NC_000006.12	H1-1	3024	CCDS4569.1	-	26017084	26017731	648	0	0	Mullerian mixed tumor
6	NC_000006.12	H1-1	3024	CCDS4569.1	-	26017084	26017731	648	0	0	Mixed epithelioid and spindle cell melanoma
6	NC_000006.12	H1-1	3024	CCDS4569.1	-	26017084	26017731	648	0	0	Pheochromocytoma, malignant
6	NC_000006.12	H1-1	3024	CCDS4569.1	-	26017084	26017731	648	0	0	Papillary carcinoma, columnar cell
6	NC_000006.12	H1-1	3024	CCDS4569.1	-	26017084	26017731	648	0	0	Undifferentiated sarcoma
6	NC_000006.12	H1-1	3024	CCDS4569.1	-	26017084	26017731	648	0	0	Thymoma, type AB, malignant
6	NC_000006.12	H1-1	3024	CCDS4569.1	-	26017084	26017731	648	0	0	Infiltrating duct and lobular carcinoma
6	NC_000006.12	H1-1	3024	CCDS4569.1	-	26017084	26017731	648	0	0	Mixed germ cell tumor
6	NC_000006.12	H1-1	3024	CCDS4569.1	-	26017084	26017731	648	0	0	Basaloid squamous cell carcinoma
6	NC_000006.12	H1-1	3024	CCDS4569.1	-	26017084	26017731	648	0	0	Thymoma, type B2, malignant
6	NC_000006.12	H1-1	3024	CCDS4569.1	-	26017084	26017731	648	0	0	Embryonal carcinoma, NOS
6	NC_000006.12	H1-1	3024	CCDS4569.1	-	26017084	26017731	648	0	0	Fibromyxosarcoma
6	NC_000006.12	H1-1	3024	CCDS4569.1	-	26017084	26017731	648	0	0	Spindle cell melanoma, NOS
6	NC_000006.12	H1-1	3024	CCDS4569.1	-	26017084	26017731	648	0	0	Acinar cell carcinoma
6	NC_000006.12	H1-1	3024	CCDS4569.1	-	26017084	26017731	648	0	0	Mesothelioma, biphasic, malignant
6	NC_000006.12	H1-1	3024	CCDS4569.1	-	26017084	26017731	648	0	0	Adenocarcinoma, endocervical type
6	NC_000006.12	H1-1	3024	CCDS4569.1	-	26017084	26017731	648	0	0	Nodular melanoma
6	NC_000006.12	H1-1	3024	CCDS4569.1	-	26017084	26017731	648	0	0	Epithelioid cell melanoma
6	NC_000006.12	H1-1	3024	CCDS4569.1	-	26017084	26017731	648	0	0	Infiltrating duct mixed with other types of carcinoma
6	NC_000006.12	H1-1	3024	CCDS4569.1	-	26017084	26017731	648	0	0	Bronchiolo-alveolar carcinoma, non-mucinous
6	NC_000006.12	H1-1	3024	CCDS4569.1	-	26017084	26017731	648	0	0	Mucinous adenocarcinoma, endocervical type
6	NC_000006.12	H1-1	3024	CCDS4569.1	-	26017084	26017731	648	0	0	Metaplastic carcinoma, NOS
6	NC_000006.12	H1-1	3024	CCDS4569.1	-	26017084	26017731	648	0	0	Signet ring cell carcinoma
6	NC_000006.12	H1-1	3024	CCDS4569.1	-	26017084	26017731	648	0	0	Thymoma, type A, malignant
6	NC_000006.12	H1-1	3024	CCDS4569.1	-	26017084	26017731	648	0	0	Thymoma, type B3, malignant
6	NC_000006.12	H1-1	3024	CCDS4569.1	-	26017084	26017731	648	0	0	Thymoma, type B1, malignant
6	NC_000006.12	H1-1	3024	CCDS4569.1	-	26017084	26017731	648	0	0	Malignant fibrous histiocytoma
6	NC_000006.12	H1-1	3024	CCDS4569.1	-	26017084	26017731	648	0	0	Infiltrating lobular carcinoma, NOS
6	NC_000006.12	H1-1	3024	CCDS4569.1	-	26017084	26017731	648	0	0	Carcinosarcoma, NOS
6	NC_000006.12	H1-1	3024	CCDS4569.1	-	26017084	26017731	648	0	0	Thymic carcinoma, NOS
6	NC_000006.12	H4C6	8361	CCDS4598.1	+	26240425	26240736	312	49	0.157051	Pancancer
6	NC_000006.12	H4C6	8361	CCDS4598.1	+	26240425	26240736	312	7	0.0224359	Adenocarcinoma, NOS
6	NC_000006.12	H4C6	8361	CCDS4598.1	+	26240425	26240736	312	13	0.0416667	Squamous cell carcinoma, NOS
6	NC_000006.12	H4C6	8361	CCDS4598.1	+	26240425	26240736	312	1	0.00320513	Infiltrating duct carcinoma, NOS
6	NC_000006.12	H4C6	8361	CCDS4598.1	+	26240425	26240736	312	2	0.00641026	Multiple myeloma
6	NC_000006.12	H4C6	8361	CCDS4598.1	+	26240425	26240736	312	0	0	Glioblastoma
6	NC_000006.12	H4C6	8361	CCDS4598.1	+	26240425	26240736	312	5	0.0160256	Serous cystadenocarcinoma, NOS
6	NC_000006.12	H4C6	8361	CCDS4598.1	+	26240425	26240736	312	0	0	Papillary adenocarcinoma, NOS
6	NC_000006.12	H4C6	8361	CCDS4598.1	+	26240425	26240736	312	0	0	Clear cell adenocarcinoma, NOS
6	NC_000006.12	H4C6	8361	CCDS4598.1	+	26240425	26240736	312	6	0.0192308	Endometrioid adenocarcinoma, NOS
6	NC_000006.12	H4C6	8361	CCDS4598.1	+	26240425	26240736	312	3	0.00961538	Malignant melanoma, NOS
6	NC_000006.12	H4C6	8361	CCDS4598.1	+	26240425	26240736	312	0	0	Hepatocellular carcinoma, NOS
6	NC_000006.12	H4C6	8361	CCDS4598.1	+	26240425	26240736	312	1	0.00320513	Transitional cell carcinoma
6	NC_000006.12	H4C6	8361	CCDS4598.1	+	26240425	26240736	312	0	0	Lobular carcinoma, NOS
6	NC_000006.12	H4C6	8361	CCDS4598.1	+	26240425	26240736	312	0	0	Acute myeloid leukemia, NOS
6	NC_000006.12	H4C6	8361	CCDS4598.1	+	26240425	26240736	312	2	0.00641026	Mucinous adenocarcinoma
6	NC_000006.12	H4C6	8361	CCDS4598.1	+	26240425	26240736	312	0	0	Mixed glioma
6	NC_000006.12	H4C6	8361	CCDS4598.1	+	26240425	26240736	312	0	0	Astrocytoma, anaplastic
6	NC_000006.12	H4C6	8361	CCDS4598.1	+	26240425	26240736	312	0	0	Renal cell carcinoma, NOS
6	NC_000006.12	H4C6	8361	CCDS4598.1	+	26240425	26240736	312	0	0	Adenocarcinoma with mixed subtypes
6	NC_000006.12	H4C6	8361	CCDS4598.1	+	26240425	26240736	312	0	0	Renal cell carcinoma, chromophobe type
6	NC_000006.12	H4C6	8361	CCDS4598.1	+	26240425	26240736	312	0	0	Oligodendroglioma, NOS
6	NC_000006.12	H4C6	8361	CCDS4598.1	+	26240425	26240736	312	0	0	Squamous cell carcinoma, keratinizing, NOS
6	NC_000006.12	H4C6	8361	CCDS4598.1	+	26240425	26240736	312	0	0	Papillary carcinoma, follicular variant
6	NC_000006.12	H4C6	8361	CCDS4598.1	+	26240425	26240736	312	0	0	Serous adenocarcinoma, NOS
6	NC_000006.12	H4C6	8361	CCDS4598.1	+	26240425	26240736	312	1	0.00320513	Leiomyosarcoma, NOS
6	NC_000006.12	H4C6	8361	CCDS4598.1	+	26240425	26240736	312	0	0	Adenocarcinoma, intestinal type
6	NC_000006.12	H4C6	8361	CCDS4598.1	+	26240425	26240736	312	0	0	Adrenal cortical carcinoma
6	NC_000006.12	H4C6	8361	CCDS4598.1	+	26240425	26240736	312	1	0.00320513	Tubular adenocarcinoma
6	NC_000006.12	H4C6	8361	CCDS4598.1	+	26240425	26240736	312	0	0	Oligodendroglioma, anaplastic
6	NC_000006.12	H4C6	8361	CCDS4598.1	+	26240425	26240736	312	1	0.00320513	Carcinoma, diffuse type
6	NC_000006.12	H4C6	8361	CCDS4598.1	+	26240425	26240736	312	0	0	Papillary transitional cell carcinoma
6	NC_000006.12	H4C6	8361	CCDS4598.1	+	26240425	26240736	312	0	0	Seminoma, NOS
6	NC_000006.12	H4C6	8361	CCDS4598.1	+	26240425	26240736	312	0	0	Squamous cell carcinoma, large cell, nonkeratinizing, NOS
6	NC_000006.12	H4C6	8361	CCDS4598.1	+	26240425	26240736	312	0	0	Astrocytoma, NOS
6	NC_000006.12	H4C6	8361	CCDS4598.1	+	26240425	26240736	312	0	0	Dedifferentiated liposarcoma
6	NC_000006.12	H4C6	8361	CCDS4598.1	+	26240425	26240736	312	0	0	Epithelioid mesothelioma, malignant
6	NC_000006.12	H4C6	8361	CCDS4598.1	+	26240425	26240736	312	0	0	Cholangiocarcinoma
6	NC_000006.12	H4C6	8361	CCDS4598.1	+	26240425	26240736	312	2	0.00641026	Malignant lymphoma, large B-cell, diffuse, NOS
6	NC_000006.12	H4C6	8361	CCDS4598.1	+	26240425	26240736	312	0	0	Mullerian mixed tumor
6	NC_000006.12	H4C6	8361	CCDS4598.1	+	26240425	26240736	312	0	0	Mixed epithelioid and spindle cell melanoma
6	NC_000006.12	H4C6	8361	CCDS4598.1	+	26240425	26240736	312	0	0	Pheochromocytoma, malignant
6	NC_000006.12	H4C6	8361	CCDS4598.1	+	26240425	26240736	312	0	0	Papillary carcinoma, columnar cell
6	NC_000006.12	H4C6	8361	CCDS4598.1	+	26240425	26240736	312	0	0	Undifferentiated sarcoma
6	NC_000006.12	H4C6	8361	CCDS4598.1	+	26240425	26240736	312	0	0	Thymoma, type AB, malignant
6	NC_000006.12	H4C6	8361	CCDS4598.1	+	26240425	26240736	312	0	0	Infiltrating duct and lobular carcinoma
6	NC_000006.12	H4C6	8361	CCDS4598.1	+	26240425	26240736	312	0	0	Mixed germ cell tumor
6	NC_000006.12	H4C6	8361	CCDS4598.1	+	26240425	26240736	312	1	0.00320513	Basaloid squamous cell carcinoma
6	NC_000006.12	H4C6	8361	CCDS4598.1	+	26240425	26240736	312	0	0	Thymoma, type B2, malignant
6	NC_000006.12	H4C6	8361	CCDS4598.1	+	26240425	26240736	312	0	0	Embryonal carcinoma, NOS
6	NC_000006.12	H4C6	8361	CCDS4598.1	+	26240425	26240736	312	0	0	Fibromyxosarcoma
6	NC_000006.12	H4C6	8361	CCDS4598.1	+	26240425	26240736	312	0	0	Spindle cell melanoma, NOS
6	NC_000006.12	H4C6	8361	CCDS4598.1	+	26240425	26240736	312	0	0	Acinar cell carcinoma
6	NC_000006.12	H4C6	8361	CCDS4598.1	+	26240425	26240736	312	0	0	Mesothelioma, biphasic, malignant
6	NC_000006.12	H4C6	8361	CCDS4598.1	+	26240425	26240736	312	0	0	Adenocarcinoma, endocervical type
6	NC_000006.12	H4C6	8361	CCDS4598.1	+	26240425	26240736	312	0	0	Nodular melanoma
6	NC_000006.12	H4C6	8361	CCDS4598.1	+	26240425	26240736	312	0	0	Epithelioid cell melanoma
6	NC_000006.12	H4C6	8361	CCDS4598.1	+	26240425	26240736	312	0	0	Infiltrating duct mixed with other types of carcinoma
6	NC_000006.12	H4C6	8361	CCDS4598.1	+	26240425	26240736	312	0	0	Bronchiolo-alveolar carcinoma, non-mucinous
6	NC_000006.12	H4C6	8361	CCDS4598.1	+	26240425	26240736	312	0	0	Mucinous adenocarcinoma, endocervical type
6	NC_000006.12	H4C6	8361	CCDS4598.1	+	26240425	26240736	312	0	0	Metaplastic carcinoma, NOS
6	NC_000006.12	H4C6	8361	CCDS4598.1	+	26240425	26240736	312	0	0	Signet ring cell carcinoma
6	NC_000006.12	H4C6	8361	CCDS4598.1	+	26240425	26240736	312	0	0	Thymoma, type A, malignant
6	NC_000006.12	H4C6	8361	CCDS4598.1	+	26240425	26240736	312	0	0	Thymoma, type B3, malignant
6	NC_000006.12	H4C6	8361	CCDS4598.1	+	26240425	26240736	312	0	0	Thymoma, type B1, malignant
6	NC_000006.12	H4C6	8361	CCDS4598.1	+	26240425	26240736	312	0	0	Malignant fibrous histiocytoma
6	NC_000006.12	H4C6	8361	CCDS4598.1	+	26240425	26240736	312	0	0	Infiltrating lobular carcinoma, NOS
6	NC_000006.12	H4C6	8361	CCDS4598.1	+	26240425	26240736	312	0	0	Carcinosarcoma, NOS
6	NC_000006.12	H4C6	8361	CCDS4598.1	+	26240425	26240736	312	0	0	Thymic carcinoma, NOS
X	NC_000023.11	H2AP	25763	CCDS43929.1	+	37990839	37991192	354	44	0.124294	Pancancer
X	NC_000023.11	H2AP	25763	CCDS43929.1	+	37990839	37991192	354	6	0.0169492	Adenocarcinoma, NOS
X	NC_000023.11	H2AP	25763	CCDS43929.1	+	37990839	37991192	354	2	0.00564972	Squamous cell carcinoma, NOS
X	NC_000023.11	H2AP	25763	CCDS43929.1	+	37990839	37991192	354	3	0.00847458	Infiltrating duct carcinoma, NOS
X	NC_000023.11	H2AP	25763	CCDS43929.1	+	37990839	37991192	354	2	0.00564972	Multiple myeloma
X	NC_000023.11	H2AP	25763	CCDS43929.1	+	37990839	37991192	354	2	0.00564972	Glioblastoma
X	NC_000023.11	H2AP	25763	CCDS43929.1	+	37990839	37991192	354	4	0.0112994	Serous cystadenocarcinoma, NOS
X	NC_000023.11	H2AP	25763	CCDS43929.1	+	37990839	37991192	354	2	0.00564972	Papillary adenocarcinoma, NOS
X	NC_000023.11	H2AP	25763	CCDS43929.1	+	37990839	37991192	354	0	0	Clear cell adenocarcinoma, NOS
X	NC_000023.11	H2AP	25763	CCDS43929.1	+	37990839	37991192	354	11	0.0310734	Endometrioid adenocarcinoma, NOS
X	NC_000023.11	H2AP	25763	CCDS43929.1	+	37990839	37991192	354	5	0.0141243	Malignant melanoma, NOS
X	NC_000023.11	H2AP	25763	CCDS43929.1	+	37990839	37991192	354	0	0	Hepatocellular carcinoma, NOS
X	NC_000023.11	H2AP	25763	CCDS43929.1	+	37990839	37991192	354	0	0	Transitional cell carcinoma
X	NC_000023.11	H2AP	25763	CCDS43929.1	+	37990839	37991192	354	0	0	Lobular carcinoma, NOS
X	NC_000023.11	H2AP	25763	CCDS43929.1	+	37990839	37991192	354	0	0	Acute myeloid leukemia, NOS
X	NC_000023.11	H2AP	25763	CCDS43929.1	+	37990839	37991192	354	0	0	Mucinous adenocarcinoma
X	NC_000023.11	H2AP	25763	CCDS43929.1	+	37990839	37991192	354	0	0	Mixed glioma
X	NC_000023.11	H2AP	25763	CCDS43929.1	+	37990839	37991192	354	0	0	Astrocytoma, anaplastic
X	NC_000023.11	H2AP	25763	CCDS43929.1	+	37990839	37991192	354	0	0	Renal cell carcinoma, NOS
X	NC_000023.11	H2AP	25763	CCDS43929.1	+	37990839	37991192	354	2	0.00564972	Adenocarcinoma with mixed subtypes
X	NC_000023.11	H2AP	25763	CCDS43929.1	+	37990839	37991192	354	0	0	Renal cell carcinoma, chromophobe type
X	NC_000023.11	H2AP	25763	CCDS43929.1	+	37990839	37991192	354	0	0	Oligodendroglioma, NOS
X	NC_000023.11	H2AP	25763	CCDS43929.1	+	37990839	37991192	354	1	0.00282486	Squamous cell carcinoma, keratinizing, NOS
X	NC_000023.11	H2AP	25763	CCDS43929.1	+	37990839	37991192	354	0	0	Papillary carcinoma, follicular variant
X	NC_000023.11	H2AP	25763	CCDS43929.1	+	37990839	37991192	354	0	0	Serous adenocarcinoma, NOS
X	NC_000023.11	H2AP	25763	CCDS43929.1	+	37990839	37991192	354	0	0	Leiomyosarcoma, NOS
X	NC_000023.11	H2AP	25763	CCDS43929.1	+	37990839	37991192	354	0	0	Adenocarcinoma, intestinal type
X	NC_000023.11	H2AP	25763	CCDS43929.1	+	37990839	37991192	354	0	0	Adrenal cortical carcinoma
X	NC_000023.11	H2AP	25763	CCDS43929.1	+	37990839	37991192	354	0	0	Tubular adenocarcinoma
X	NC_000023.11	H2AP	25763	CCDS43929.1	+	37990839	37991192	354	0	0	Oligodendroglioma, anaplastic
X	NC_000023.11	H2AP	25763	CCDS43929.1	+	37990839	37991192	354	0	0	Carcinoma, diffuse type
X	NC_000023.11	H2AP	25763	CCDS43929.1	+	37990839	37991192	354	0	0	Papillary transitional cell carcinoma
X	NC_000023.11	H2AP	25763	CCDS43929.1	+	37990839	37991192	354	0	0	Seminoma, NOS
X	NC_000023.11	H2AP	25763	CCDS43929.1	+	37990839	37991192	354	1	0.00282486	Squamous cell carcinoma, large cell, nonkeratinizing, NOS
X	NC_000023.11	H2AP	25763	CCDS43929.1	+	37990839	37991192	354	0	0	Astrocytoma, NOS
X	NC_000023.11	H2AP	25763	CCDS43929.1	+	37990839	37991192	354	0	0	Dedifferentiated liposarcoma
X	NC_000023.11	H2AP	25763	CCDS43929.1	+	37990839	37991192	354	0	0	Epithelioid mesothelioma, malignant
X	NC_000023.11	H2AP	25763	CCDS43929.1	+	37990839	37991192	354	0	0	Cholangiocarcinoma
X	NC_000023.11	H2AP	25763	CCDS43929.1	+	37990839	37991192	354	0	0	Malignant lymphoma, large B-cell, diffuse, NOS
X	NC_000023.11	H2AP	25763	CCDS43929.1	+	37990839	37991192	354	0	0	Mullerian mixed tumor
X	NC_000023.11	H2AP	25763	CCDS43929.1	+	37990839	37991192	354	0	0	Mixed epithelioid and spindle cell melanoma
X	NC_000023.11	H2AP	25763	CCDS43929.1	+	37990839	37991192	354	0	0	Pheochromocytoma, malignant
X	NC_000023.11	H2AP	25763	CCDS43929.1	+	37990839	37991192	354	0	0	Papillary carcinoma, columnar cell
X	NC_000023.11	H2AP	25763	CCDS43929.1	+	37990839	37991192	354	0	0	Undifferentiated sarcoma
X	NC_000023.11	H2AP	25763	CCDS43929.1	+	37990839	37991192	354	0	0	Thymoma, type AB, malignant
X	NC_000023.11	H2AP	25763	CCDS43929.1	+	37990839	37991192	354	0	0	Infiltrating duct and lobular carcinoma
X	NC_000023.11	H2AP	25763	CCDS43929.1	+	37990839	37991192	354	0	0	Mixed germ cell tumor
X	NC_000023.11	H2AP	25763	CCDS43929.1	+	37990839	37991192	354	0	0	Basaloid squamous cell carcinoma
X	NC_000023.11	H2AP	25763	CCDS43929.1	+	37990839	37991192	354	0	0	Thymoma, type B2, malignant
X	NC_000023.11	H2AP	25763	CCDS43929.1	+	37990839	37991192	354	0	0	Embryonal carcinoma, NOS
X	NC_000023.11	H2AP	25763	CCDS43929.1	+	37990839	37991192	354	0	0	Fibromyxosarcoma
X	NC_000023.11	H2AP	25763	CCDS43929.1	+	37990839	37991192	354	0	0	Spindle cell melanoma, NOS
X	NC_000023.11	H2AP	25763	CCDS43929.1	+	37990839	37991192	354	0	0	Acinar cell carcinoma
X	NC_000023.11	H2AP	25763	CCDS43929.1	+	37990839	37991192	354	0	0	Mesothelioma, biphasic, malignant
X	NC_000023.11	H2AP	25763	CCDS43929.1	+	37990839	37991192	354	0	0	Adenocarcinoma, endocervical type
X	NC_000023.11	H2AP	25763	CCDS43929.1	+	37990839	37991192	354	0	0	Nodular melanoma
X	NC_000023.11	H2AP	25763	CCDS43929.1	+	37990839	37991192	354	0	0	Epithelioid cell melanoma
X	NC_000023.11	H2AP	25763	CCDS43929.1	+	37990839	37991192	354	0	0	Infiltrating duct mixed with other types of carcinoma
X	NC_000023.11	H2AP	25763	CCDS43929.1	+	37990839	37991192	354	0	0	Bronchiolo-alveolar carcinoma, non-mucinous
X	NC_000023.11	H2AP	25763	CCDS43929.1	+	37990839	37991192	354	0	0	Mucinous adenocarcinoma, endocervical type
X	NC_000023.11	H2AP	25763	CCDS43929.1	+	37990839	37991192	354	0	0	Metaplastic carcinoma, NOS
X	NC_000023.11	H2AP	25763	CCDS43929.1	+	37990839	37991192	354	0	0	Signet ring cell carcinoma
X	NC_000023.11	H2AP	25763	CCDS43929.1	+	37990839	37991192	354	0	0	Thymoma, type A, malignant
X	NC_000023.11	H2AP	25763	CCDS43929.1	+	37990839	37991192	354	0	0	Thymoma, type B3, malignant
X	NC_000023.11	H2AP	25763	CCDS43929.1	+	37990839	37991192	354	0	0	Thymoma, type B1, malignant
X	NC_000023.11	H2AP	25763	CCDS43929.1	+	37990839	37991192	354	0	0	Malignant fibrous histiocytoma
X	NC_000023.11	H2AP	25763	CCDS43929.1	+	37990839	37991192	354	0	0	Infiltrating lobular carcinoma, NOS
X	NC_000023.11	H2AP	25763	CCDS43929.1	+	37990839	37991192	354	0	0	Carcinosarcoma, NOS
X	NC_000023.11	H2AP	25763	CCDS43929.1	+	37990839	37991192	354	0	0	Thymic carcinoma, NOS
6	NC_000006.12	H4C12	8362	CCDS4631.1	-	27831215	27831526	312	64	0.205128	Pancancer
6	NC_000006.12	H4C12	8362	CCDS4631.1	-	27831215	27831526	312	10	0.0320513	Adenocarcinoma, NOS
6	NC_000006.12	H4C12	8362	CCDS4631.1	-	27831215	27831526	312	13	0.0416667	Squamous cell carcinoma, NOS
6	NC_000006.12	H4C12	8362	CCDS4631.1	-	27831215	27831526	312	2	0.00641026	Infiltrating duct carcinoma, NOS
6	NC_000006.12	H4C12	8362	CCDS4631.1	-	27831215	27831526	312	4	0.0128205	Multiple myeloma
6	NC_000006.12	H4C12	8362	CCDS4631.1	-	27831215	27831526	312	0	0	Glioblastoma
6	NC_000006.12	H4C12	8362	CCDS4631.1	-	27831215	27831526	312	4	0.0128205	Serous cystadenocarcinoma, NOS
6	NC_000006.12	H4C12	8362	CCDS4631.1	-	27831215	27831526	312	0	0	Papillary adenocarcinoma, NOS
6	NC_000006.12	H4C12	8362	CCDS4631.1	-	27831215	27831526	312	0	0	Clear cell adenocarcinoma, NOS
6	NC_000006.12	H4C12	8362	CCDS4631.1	-	27831215	27831526	312	9	0.0288462	Endometrioid adenocarcinoma, NOS
6	NC_000006.12	H4C12	8362	CCDS4631.1	-	27831215	27831526	312	1	0.00320513	Malignant melanoma, NOS
6	NC_000006.12	H4C12	8362	CCDS4631.1	-	27831215	27831526	312	2	0.00641026	Hepatocellular carcinoma, NOS
6	NC_000006.12	H4C12	8362	CCDS4631.1	-	27831215	27831526	312	5	0.0160256	Transitional cell carcinoma
6	NC_000006.12	H4C12	8362	CCDS4631.1	-	27831215	27831526	312	0	0	Lobular carcinoma, NOS
6	NC_000006.12	H4C12	8362	CCDS4631.1	-	27831215	27831526	312	0	0	Acute myeloid leukemia, NOS
6	NC_000006.12	H4C12	8362	CCDS4631.1	-	27831215	27831526	312	0	0	Mucinous adenocarcinoma
6	NC_000006.12	H4C12	8362	CCDS4631.1	-	27831215	27831526	312	1	0.00320513	Mixed glioma
6	NC_000006.12	H4C12	8362	CCDS4631.1	-	27831215	27831526	312	1	0.00320513	Astrocytoma, anaplastic
6	NC_000006.12	H4C12	8362	CCDS4631.1	-	27831215	27831526	312	0	0	Renal cell carcinoma, NOS
6	NC_000006.12	H4C12	8362	CCDS4631.1	-	27831215	27831526	312	0	0	Adenocarcinoma with mixed subtypes
6	NC_000006.12	H4C12	8362	CCDS4631.1	-	27831215	27831526	312	0	0	Renal cell carcinoma, chromophobe type
6	NC_000006.12	H4C12	8362	CCDS4631.1	-	27831215	27831526	312	0	0	Oligodendroglioma, NOS
6	NC_000006.12	H4C12	8362	CCDS4631.1	-	27831215	27831526	312	0	0	Squamous cell carcinoma, keratinizing, NOS
6	NC_000006.12	H4C12	8362	CCDS4631.1	-	27831215	27831526	312	0	0	Papillary carcinoma, follicular variant
6	NC_000006.12	H4C12	8362	CCDS4631.1	-	27831215	27831526	312	1	0.00320513	Serous adenocarcinoma, NOS
6	NC_000006.12	H4C12	8362	CCDS4631.1	-	27831215	27831526	312	0	0	Leiomyosarcoma, NOS
6	NC_000006.12	H4C12	8362	CCDS4631.1	-	27831215	27831526	312	2	0.00641026	Adenocarcinoma, intestinal type
6	NC_000006.12	H4C12	8362	CCDS4631.1	-	27831215	27831526	312	0	0	Adrenal cortical carcinoma
6	NC_000006.12	H4C12	8362	CCDS4631.1	-	27831215	27831526	312	0	0	Tubular adenocarcinoma
6	NC_000006.12	H4C12	8362	CCDS4631.1	-	27831215	27831526	312	0	0	Oligodendroglioma, anaplastic
6	NC_000006.12	H4C12	8362	CCDS4631.1	-	27831215	27831526	312	0	0	Carcinoma, diffuse type
6	NC_000006.12	H4C12	8362	CCDS4631.1	-	27831215	27831526	312	0	0	Papillary transitional cell carcinoma
6	NC_000006.12	H4C12	8362	CCDS4631.1	-	27831215	27831526	312	0	0	Seminoma, NOS
6	NC_000006.12	H4C12	8362	CCDS4631.1	-	27831215	27831526	312	0	0	Squamous cell carcinoma, large cell, nonkeratinizing, NOS
6	NC_000006.12	H4C12	8362	CCDS4631.1	-	27831215	27831526	312	0	0	Astrocytoma, NOS
6	NC_000006.12	H4C12	8362	CCDS4631.1	-	27831215	27831526	312	0	0	Dedifferentiated liposarcoma
6	NC_000006.12	H4C12	8362	CCDS4631.1	-	27831215	27831526	312	0	0	Epithelioid mesothelioma, malignant
6	NC_000006.12	H4C12	8362	CCDS4631.1	-	27831215	27831526	312	0	0	Cholangiocarcinoma
6	NC_000006.12	H4C12	8362	CCDS4631.1	-	27831215	27831526	312	3	0.00961538	Malignant lymphoma, large B-cell, diffuse, NOS
6	NC_000006.12	H4C12	8362	CCDS4631.1	-	27831215	27831526	312	0	0	Mullerian mixed tumor
6	NC_000006.12	H4C12	8362	CCDS4631.1	-	27831215	27831526	312	0	0	Mixed epithelioid and spindle cell melanoma
6	NC_000006.12	H4C12	8362	CCDS4631.1	-	27831215	27831526	312	0	0	Pheochromocytoma, malignant
6	NC_000006.12	H4C12	8362	CCDS4631.1	-	27831215	27831526	312	0	0	Papillary carcinoma, columnar cell
6	NC_000006.12	H4C12	8362	CCDS4631.1	-	27831215	27831526	312	0	0	Undifferentiated sarcoma
6	NC_000006.12	H4C12	8362	CCDS4631.1	-	27831215	27831526	312	0	0	Thymoma, type AB, malignant
6	NC_000006.12	H4C12	8362	CCDS4631.1	-	27831215	27831526	312	0	0	Infiltrating duct and lobular carcinoma
6	NC_000006.12	H4C12	8362	CCDS4631.1	-	27831215	27831526	312	0	0	Mixed germ cell tumor
6	NC_000006.12	H4C12	8362	CCDS4631.1	-	27831215	27831526	312	1	0.00320513	Basaloid squamous cell carcinoma
6	NC_000006.12	H4C12	8362	CCDS4631.1	-	27831215	27831526	312	0	0	Thymoma, type B2, malignant
6	NC_000006.12	H4C12	8362	CCDS4631.1	-	27831215	27831526	312	0	0	Embryonal carcinoma, NOS
6	NC_000006.12	H4C12	8362	CCDS4631.1	-	27831215	27831526	312	0	0	Fibromyxosarcoma
6	NC_000006.12	H4C12	8362	CCDS4631.1	-	27831215	27831526	312	0	0	Spindle cell melanoma, NOS
6	NC_000006.12	H4C12	8362	CCDS4631.1	-	27831215	27831526	312	0	0	Acinar cell carcinoma
6	NC_000006.12	H4C12	8362	CCDS4631.1	-	27831215	27831526	312	0	0	Mesothelioma, biphasic, malignant
6	NC_000006.12	H4C12	8362	CCDS4631.1	-	27831215	27831526	312	0	0	Adenocarcinoma, endocervical type
6	NC_000006.12	H4C12	8362	CCDS4631.1	-	27831215	27831526	312	1	0.00320513	Nodular melanoma
6	NC_000006.12	H4C12	8362	CCDS4631.1	-	27831215	27831526	312	0	0	Epithelioid cell melanoma
6	NC_000006.12	H4C12	8362	CCDS4631.1	-	27831215	27831526	312	0	0	Infiltrating duct mixed with other types of carcinoma
6	NC_000006.12	H4C12	8362	CCDS4631.1	-	27831215	27831526	312	1	0.00320513	Bronchiolo-alveolar carcinoma, non-mucinous
6	NC_000006.12	H4C12	8362	CCDS4631.1	-	27831215	27831526	312	1	0.00320513	Mucinous adenocarcinoma, endocervical type
6	NC_000006.12	H4C12	8362	CCDS4631.1	-	27831215	27831526	312	0	0	Metaplastic carcinoma, NOS
6	NC_000006.12	H4C12	8362	CCDS4631.1	-	27831215	27831526	312	0	0	Signet ring cell carcinoma
6	NC_000006.12	H4C12	8362	CCDS4631.1	-	27831215	27831526	312	0	0	Thymoma, type A, malignant
6	NC_000006.12	H4C12	8362	CCDS4631.1	-	27831215	27831526	312	0	0	Thymoma, type B3, malignant
6	NC_000006.12	H4C12	8362	CCDS4631.1	-	27831215	27831526	312	0	0	Thymoma, type B1, malignant
6	NC_000006.12	H4C12	8362	CCDS4631.1	-	27831215	27831526	312	0	0	Malignant fibrous histiocytoma
6	NC_000006.12	H4C12	8362	CCDS4631.1	-	27831215	27831526	312	0	0	Infiltrating lobular carcinoma, NOS
6	NC_000006.12	H4C12	8362	CCDS4631.1	-	27831215	27831526	312	0	0	Carcinosarcoma, NOS
6	NC_000006.12	H4C12	8362	CCDS4631.1	-	27831215	27831526	312	1	0.00320513	Thymic carcinoma, NOS
6	NC_000006.12	H2BC15	8341	CCDS4633.1	+	27838661	27839041	381	40	0.104987	Pancancer
6	NC_000006.12	H2BC15	8341	CCDS4633.1	+	27838661	27839041	381	3	0.00787402	Adenocarcinoma, NOS
6	NC_000006.12	H2BC15	8341	CCDS4633.1	+	27838661	27839041	381	5	0.0131234	Squamous cell carcinoma, NOS
6	NC_000006.12	H2BC15	8341	CCDS4633.1	+	27838661	27839041	381	3	0.00787402	Infiltrating duct carcinoma, NOS
6	NC_000006.12	H2BC15	8341	CCDS4633.1	+	27838661	27839041	381	1	0.00262467	Multiple myeloma
6	NC_000006.12	H2BC15	8341	CCDS4633.1	+	27838661	27839041	381	0	0	Glioblastoma
6	NC_000006.12	H2BC15	8341	CCDS4633.1	+	27838661	27839041	381	3	0.00787402	Serous cystadenocarcinoma, NOS
6	NC_000006.12	H2BC15	8341	CCDS4633.1	+	27838661	27839041	381	1	0.00262467	Papillary adenocarcinoma, NOS
6	NC_000006.12	H2BC15	8341	CCDS4633.1	+	27838661	27839041	381	1	0.00262467	Clear cell adenocarcinoma, NOS
6	NC_000006.12	H2BC15	8341	CCDS4633.1	+	27838661	27839041	381	6	0.015748	Endometrioid adenocarcinoma, NOS
6	NC_000006.12	H2BC15	8341	CCDS4633.1	+	27838661	27839041	381	1	0.00262467	Malignant melanoma, NOS
6	NC_000006.12	H2BC15	8341	CCDS4633.1	+	27838661	27839041	381	1	0.00262467	Hepatocellular carcinoma, NOS
6	NC_000006.12	H2BC15	8341	CCDS4633.1	+	27838661	27839041	381	5	0.0131234	Transitional cell carcinoma
6	NC_000006.12	H2BC15	8341	CCDS4633.1	+	27838661	27839041	381	1	0.00262467	Lobular carcinoma, NOS
6	NC_000006.12	H2BC15	8341	CCDS4633.1	+	27838661	27839041	381	0	0	Acute myeloid leukemia, NOS
6	NC_000006.12	H2BC15	8341	CCDS4633.1	+	27838661	27839041	381	0	0	Mucinous adenocarcinoma
6	NC_000006.12	H2BC15	8341	CCDS4633.1	+	27838661	27839041	381	0	0	Mixed glioma
6	NC_000006.12	H2BC15	8341	CCDS4633.1	+	27838661	27839041	381	0	0	Astrocytoma, anaplastic
6	NC_000006.12	H2BC15	8341	CCDS4633.1	+	27838661	27839041	381	0	0	Renal cell carcinoma, NOS
6	NC_000006.12	H2BC15	8341	CCDS4633.1	+	27838661	27839041	381	0	0	Adenocarcinoma with mixed subtypes
6	NC_000006.12	H2BC15	8341	CCDS4633.1	+	27838661	27839041	381	0	0	Renal cell carcinoma, chromophobe type
6	NC_000006.12	H2BC15	8341	CCDS4633.1	+	27838661	27839041	381	0	0	Oligodendroglioma, NOS
6	NC_000006.12	H2BC15	8341	CCDS4633.1	+	27838661	27839041	381	1	0.00262467	Squamous cell carcinoma, keratinizing, NOS
6	NC_000006.12	H2BC15	8341	CCDS4633.1	+	27838661	27839041	381	0	0	Papillary carcinoma, follicular variant
6	NC_000006.12	H2BC15	8341	CCDS4633.1	+	27838661	27839041	381	0	0	Serous adenocarcinoma, NOS
6	NC_000006.12	H2BC15	8341	CCDS4633.1	+	27838661	27839041	381	0	0	Leiomyosarcoma, NOS
6	NC_000006.12	H2BC15	8341	CCDS4633.1	+	27838661	27839041	381	2	0.00524934	Adenocarcinoma, intestinal type
6	NC_000006.12	H2BC15	8341	CCDS4633.1	+	27838661	27839041	381	1	0.00262467	Adrenal cortical carcinoma
6	NC_000006.12	H2BC15	8341	CCDS4633.1	+	27838661	27839041	381	0	0	Tubular adenocarcinoma
6	NC_000006.12	H2BC15	8341	CCDS4633.1	+	27838661	27839041	381	0	0	Oligodendroglioma, anaplastic
6	NC_000006.12	H2BC15	8341	CCDS4633.1	+	27838661	27839041	381	0	0	Carcinoma, diffuse type
6	NC_000006.12	H2BC15	8341	CCDS4633.1	+	27838661	27839041	381	1	0.00262467	Papillary transitional cell carcinoma
6	NC_000006.12	H2BC15	8341	CCDS4633.1	+	27838661	27839041	381	0	0	Seminoma, NOS
6	NC_000006.12	H2BC15	8341	CCDS4633.1	+	27838661	27839041	381	0	0	Squamous cell carcinoma, large cell, nonkeratinizing, NOS
6	NC_000006.12	H2BC15	8341	CCDS4633.1	+	27838661	27839041	381	0	0	Astrocytoma, NOS
6	NC_000006.12	H2BC15	8341	CCDS4633.1	+	27838661	27839041	381	0	0	Dedifferentiated liposarcoma
6	NC_000006.12	H2BC15	8341	CCDS4633.1	+	27838661	27839041	381	0	0	Epithelioid mesothelioma, malignant
6	NC_000006.12	H2BC15	8341	CCDS4633.1	+	27838661	27839041	381	0	0	Cholangiocarcinoma
6	NC_000006.12	H2BC15	8341	CCDS4633.1	+	27838661	27839041	381	1	0.00262467	Malignant lymphoma, large B-cell, diffuse, NOS
6	NC_000006.12	H2BC15	8341	CCDS4633.1	+	27838661	27839041	381	0	0	Mullerian mixed tumor
6	NC_000006.12	H2BC15	8341	CCDS4633.1	+	27838661	27839041	381	0	0	Mixed epithelioid and spindle cell melanoma
6	NC_000006.12	H2BC15	8341	CCDS4633.1	+	27838661	27839041	381	0	0	Pheochromocytoma, malignant
6	NC_000006.12	H2BC15	8341	CCDS4633.1	+	27838661	27839041	381	0	0	Papillary carcinoma, columnar cell
6	NC_000006.12	H2BC15	8341	CCDS4633.1	+	27838661	27839041	381	0	0	Undifferentiated sarcoma
6	NC_000006.12	H2BC15	8341	CCDS4633.1	+	27838661	27839041	381	0	0	Thymoma, type AB, malignant
6	NC_000006.12	H2BC15	8341	CCDS4633.1	+	27838661	27839041	381	0	0	Infiltrating duct and lobular carcinoma
6	NC_000006.12	H2BC15	8341	CCDS4633.1	+	27838661	27839041	381	0	0	Mixed germ cell tumor
6	NC_000006.12	H2BC15	8341	CCDS4633.1	+	27838661	27839041	381	3	0.00787402	Basaloid squamous cell carcinoma
6	NC_000006.12	H2BC15	8341	CCDS4633.1	+	27838661	27839041	381	0	0	Thymoma, type B2, malignant
6	NC_000006.12	H2BC15	8341	CCDS4633.1	+	27838661	27839041	381	0	0	Embryonal carcinoma, NOS
6	NC_000006.12	H2BC15	8341	CCDS4633.1	+	27838661	27839041	381	0	0	Fibromyxosarcoma
6	NC_000006.12	H2BC15	8341	CCDS4633.1	+	27838661	27839041	381	0	0	Spindle cell melanoma, NOS
6	NC_000006.12	H2BC15	8341	CCDS4633.1	+	27838661	27839041	381	0	0	Acinar cell carcinoma
6	NC_000006.12	H2BC15	8341	CCDS4633.1	+	27838661	27839041	381	0	0	Mesothelioma, biphasic, malignant
6	NC_000006.12	H2BC15	8341	CCDS4633.1	+	27838661	27839041	381	0	0	Adenocarcinoma, endocervical type
6	NC_000006.12	H2BC15	8341	CCDS4633.1	+	27838661	27839041	381	0	0	Nodular melanoma
6	NC_000006.12	H2BC15	8341	CCDS4633.1	+	27838661	27839041	381	0	0	Epithelioid cell melanoma
6	NC_000006.12	H2BC15	8341	CCDS4633.1	+	27838661	27839041	381	0	0	Infiltrating duct mixed with other types of carcinoma
6	NC_000006.12	H2BC15	8341	CCDS4633.1	+	27838661	27839041	381	0	0	Bronchiolo-alveolar carcinoma, non-mucinous
6	NC_000006.12	H2BC15	8341	CCDS4633.1	+	27838661	27839041	381	0	0	Mucinous adenocarcinoma, endocervical type
6	NC_000006.12	H2BC15	8341	CCDS4633.1	+	27838661	27839041	381	0	0	Metaplastic carcinoma, NOS
6	NC_000006.12	H2BC15	8341	CCDS4633.1	+	27838661	27839041	381	0	0	Signet ring cell carcinoma
6	NC_000006.12	H2BC15	8341	CCDS4633.1	+	27838661	27839041	381	0	0	Thymoma, type A, malignant
6	NC_000006.12	H2BC15	8341	CCDS4633.1	+	27838661	27839041	381	0	0	Thymoma, type B3, malignant
6	NC_000006.12	H2BC15	8341	CCDS4633.1	+	27838661	27839041	381	0	0	Thymoma, type B1, malignant
6	NC_000006.12	H2BC15	8341	CCDS4633.1	+	27838661	27839041	381	0	0	Malignant fibrous histiocytoma
6	NC_000006.12	H2BC15	8341	CCDS4633.1	+	27838661	27839041	381	0	0	Infiltrating lobular carcinoma, NOS
6	NC_000006.12	H2BC15	8341	CCDS4633.1	+	27838661	27839041	381	0	0	Carcinosarcoma, NOS
6	NC_000006.12	H2BC15	8341	CCDS4633.1	+	27838661	27839041	381	0	0	Thymic carcinoma, NOS
6	NC_000006.12	H3C6	8353	CCDS4596.1	+	26225154	26225564	411	67	0.163017	Pancancer
6	NC_000006.12	H3C6	8353	CCDS4596.1	+	26225154	26225564	411	20	0.0486618	Adenocarcinoma, NOS
6	NC_000006.12	H3C6	8353	CCDS4596.1	+	26225154	26225564	411	11	0.026764	Squamous cell carcinoma, NOS
6	NC_000006.12	H3C6	8353	CCDS4596.1	+	26225154	26225564	411	0	0	Infiltrating duct carcinoma, NOS
6	NC_000006.12	H3C6	8353	CCDS4596.1	+	26225154	26225564	411	1	0.00243309	Multiple myeloma
6	NC_000006.12	H3C6	8353	CCDS4596.1	+	26225154	26225564	411	0	0	Glioblastoma
6	NC_000006.12	H3C6	8353	CCDS4596.1	+	26225154	26225564	411	3	0.00729927	Serous cystadenocarcinoma, NOS
6	NC_000006.12	H3C6	8353	CCDS4596.1	+	26225154	26225564	411	1	0.00243309	Papillary adenocarcinoma, NOS
6	NC_000006.12	H3C6	8353	CCDS4596.1	+	26225154	26225564	411	0	0	Clear cell adenocarcinoma, NOS
6	NC_000006.12	H3C6	8353	CCDS4596.1	+	26225154	26225564	411	14	0.0340633	Endometrioid adenocarcinoma, NOS
6	NC_000006.12	H3C6	8353	CCDS4596.1	+	26225154	26225564	411	0	0	Malignant melanoma, NOS
6	NC_000006.12	H3C6	8353	CCDS4596.1	+	26225154	26225564	411	0	0	Hepatocellular carcinoma, NOS
6	NC_000006.12	H3C6	8353	CCDS4596.1	+	26225154	26225564	411	3	0.00729927	Transitional cell carcinoma
6	NC_000006.12	H3C6	8353	CCDS4596.1	+	26225154	26225564	411	0	0	Lobular carcinoma, NOS
6	NC_000006.12	H3C6	8353	CCDS4596.1	+	26225154	26225564	411	0	0	Acute myeloid leukemia, NOS
6	NC_000006.12	H3C6	8353	CCDS4596.1	+	26225154	26225564	411	1	0.00243309	Mucinous adenocarcinoma
6	NC_000006.12	H3C6	8353	CCDS4596.1	+	26225154	26225564	411	0	0	Mixed glioma
6	NC_000006.12	H3C6	8353	CCDS4596.1	+	26225154	26225564	411	0	0	Astrocytoma, anaplastic
6	NC_000006.12	H3C6	8353	CCDS4596.1	+	26225154	26225564	411	0	0	Renal cell carcinoma, NOS
6	NC_000006.12	H3C6	8353	CCDS4596.1	+	26225154	26225564	411	3	0.00729927	Adenocarcinoma with mixed subtypes
6	NC_000006.12	H3C6	8353	CCDS4596.1	+	26225154	26225564	411	0	0	Renal cell carcinoma, chromophobe type
6	NC_000006.12	H3C6	8353	CCDS4596.1	+	26225154	26225564	411	0	0	Oligodendroglioma, NOS
6	NC_000006.12	H3C6	8353	CCDS4596.1	+	26225154	26225564	411	2	0.00486618	Squamous cell carcinoma, keratinizing, NOS
6	NC_000006.12	H3C6	8353	CCDS4596.1	+	26225154	26225564	411	0	0	Papillary carcinoma, follicular variant
6	NC_000006.12	H3C6	8353	CCDS4596.1	+	26225154	26225564	411	0	0	Serous adenocarcinoma, NOS
6	NC_000006.12	H3C6	8353	CCDS4596.1	+	26225154	26225564	411	0	0	Leiomyosarcoma, NOS
6	NC_000006.12	H3C6	8353	CCDS4596.1	+	26225154	26225564	411	1	0.00243309	Adenocarcinoma, intestinal type
6	NC_000006.12	H3C6	8353	CCDS4596.1	+	26225154	26225564	411	1	0.00243309	Adrenal cortical carcinoma
6	NC_000006.12	H3C6	8353	CCDS4596.1	+	26225154	26225564	411	1	0.00243309	Tubular adenocarcinoma
6	NC_000006.12	H3C6	8353	CCDS4596.1	+	26225154	26225564	411	0	0	Oligodendroglioma, anaplastic
6	NC_000006.12	H3C6	8353	CCDS4596.1	+	26225154	26225564	411	1	0.00243309	Carcinoma, diffuse type
6	NC_000006.12	H3C6	8353	CCDS4596.1	+	26225154	26225564	411	0	0	Papillary transitional cell carcinoma
6	NC_000006.12	H3C6	8353	CCDS4596.1	+	26225154	26225564	411	0	0	Seminoma, NOS
6	NC_000006.12	H3C6	8353	CCDS4596.1	+	26225154	26225564	411	0	0	Squamous cell carcinoma, large cell, nonkeratinizing, NOS
6	NC_000006.12	H3C6	8353	CCDS4596.1	+	26225154	26225564	411	0	0	Astrocytoma, NOS
6	NC_000006.12	H3C6	8353	CCDS4596.1	+	26225154	26225564	411	0	0	Dedifferentiated liposarcoma
6	NC_000006.12	H3C6	8353	CCDS4596.1	+	26225154	26225564	411	0	0	Epithelioid mesothelioma, malignant
6	NC_000006.12	H3C6	8353	CCDS4596.1	+	26225154	26225564	411	0	0	Cholangiocarcinoma
6	NC_000006.12	H3C6	8353	CCDS4596.1	+	26225154	26225564	411	0	0	Malignant lymphoma, large B-cell, diffuse, NOS
6	NC_000006.12	H3C6	8353	CCDS4596.1	+	26225154	26225564	411	1	0.00243309	Mullerian mixed tumor
6	NC_000006.12	H3C6	8353	CCDS4596.1	+	26225154	26225564	411	0	0	Mixed epithelioid and spindle cell melanoma
6	NC_000006.12	H3C6	8353	CCDS4596.1	+	26225154	26225564	411	0	0	Pheochromocytoma, malignant
6	NC_000006.12	H3C6	8353	CCDS4596.1	+	26225154	26225564	411	0	0	Papillary carcinoma, columnar cell
6	NC_000006.12	H3C6	8353	CCDS4596.1	+	26225154	26225564	411	1	0.00243309	Undifferentiated sarcoma
6	NC_000006.12	H3C6	8353	CCDS4596.1	+	26225154	26225564	411	0	0	Thymoma, type AB, malignant
6	NC_000006.12	H3C6	8353	CCDS4596.1	+	26225154	26225564	411	0	0	Infiltrating duct and lobular carcinoma
6	NC_000006.12	H3C6	8353	CCDS4596.1	+	26225154	26225564	411	0	0	Mixed germ cell tumor
6	NC_000006.12	H3C6	8353	CCDS4596.1	+	26225154	26225564	411	0	0	Basaloid squamous cell carcinoma
6	NC_000006.12	H3C6	8353	CCDS4596.1	+	26225154	26225564	411	0	0	Thymoma, type B2, malignant
6	NC_000006.12	H3C6	8353	CCDS4596.1	+	26225154	26225564	411	0	0	Embryonal carcinoma, NOS
6	NC_000006.12	H3C6	8353	CCDS4596.1	+	26225154	26225564	411	0	0	Fibromyxosarcoma
6	NC_000006.12	H3C6	8353	CCDS4596.1	+	26225154	26225564	411	0	0	Spindle cell melanoma, NOS
6	NC_000006.12	H3C6	8353	CCDS4596.1	+	26225154	26225564	411	0	0	Acinar cell carcinoma
6	NC_000006.12	H3C6	8353	CCDS4596.1	+	26225154	26225564	411	0	0	Mesothelioma, biphasic, malignant
6	NC_000006.12	H3C6	8353	CCDS4596.1	+	26225154	26225564	411	0	0	Adenocarcinoma, endocervical type
6	NC_000006.12	H3C6	8353	CCDS4596.1	+	26225154	26225564	411	0	0	Nodular melanoma
6	NC_000006.12	H3C6	8353	CCDS4596.1	+	26225154	26225564	411	0	0	Epithelioid cell melanoma
6	NC_000006.12	H3C6	8353	CCDS4596.1	+	26225154	26225564	411	0	0	Infiltrating duct mixed with other types of carcinoma
6	NC_000006.12	H3C6	8353	CCDS4596.1	+	26225154	26225564	411	0	0	Bronchiolo-alveolar carcinoma, non-mucinous
6	NC_000006.12	H3C6	8353	CCDS4596.1	+	26225154	26225564	411	1	0.00243309	Mucinous adenocarcinoma, endocervical type
6	NC_000006.12	H3C6	8353	CCDS4596.1	+	26225154	26225564	411	0	0	Metaplastic carcinoma, NOS
6	NC_000006.12	H3C6	8353	CCDS4596.1	+	26225154	26225564	411	0	0	Signet ring cell carcinoma
6	NC_000006.12	H3C6	8353	CCDS4596.1	+	26225154	26225564	411	0	0	Thymoma, type A, malignant
6	NC_000006.12	H3C6	8353	CCDS4596.1	+	26225154	26225564	411	0	0	Thymoma, type B3, malignant
6	NC_000006.12	H3C6	8353	CCDS4596.1	+	26225154	26225564	411	0	0	Thymoma, type B1, malignant
6	NC_000006.12	H3C6	8353	CCDS4596.1	+	26225154	26225564	411	0	0	Malignant fibrous histiocytoma
6	NC_000006.12	H3C6	8353	CCDS4596.1	+	26225154	26225564	411	0	0	Infiltrating lobular carcinoma, NOS
6	NC_000006.12	H3C6	8353	CCDS4596.1	+	26225154	26225564	411	0	0	Carcinosarcoma, NOS
6	NC_000006.12	H3C6	8353	CCDS4596.1	+	26225154	26225564	411	0	0	Thymic carcinoma, NOS
6	NC_000006.12	H2AC11	8969	CCDS4619.1	+	27133071	27133463	393	78	0.198473	Pancancer
6	NC_000006.12	H2AC11	8969	CCDS4619.1	+	27133071	27133463	393	14	0.0356234	Adenocarcinoma, NOS
6	NC_000006.12	H2AC11	8969	CCDS4619.1	+	27133071	27133463	393	11	0.0279898	Squamous cell carcinoma, NOS
6	NC_000006.12	H2AC11	8969	CCDS4619.1	+	27133071	27133463	393	3	0.00763359	Infiltrating duct carcinoma, NOS
6	NC_000006.12	H2AC11	8969	CCDS4619.1	+	27133071	27133463	393	5	0.0127226	Multiple myeloma
6	NC_000006.12	H2AC11	8969	CCDS4619.1	+	27133071	27133463	393	2	0.00508906	Glioblastoma
6	NC_000006.12	H2AC11	8969	CCDS4619.1	+	27133071	27133463	393	4	0.0101781	Serous cystadenocarcinoma, NOS
6	NC_000006.12	H2AC11	8969	CCDS4619.1	+	27133071	27133463	393	0	0	Papillary adenocarcinoma, NOS
6	NC_000006.12	H2AC11	8969	CCDS4619.1	+	27133071	27133463	393	0	0	Clear cell adenocarcinoma, NOS
6	NC_000006.12	H2AC11	8969	CCDS4619.1	+	27133071	27133463	393	11	0.0279898	Endometrioid adenocarcinoma, NOS
6	NC_000006.12	H2AC11	8969	CCDS4619.1	+	27133071	27133463	393	1	0.00254453	Malignant melanoma, NOS
6	NC_000006.12	H2AC11	8969	CCDS4619.1	+	27133071	27133463	393	3	0.00763359	Hepatocellular carcinoma, NOS
6	NC_000006.12	H2AC11	8969	CCDS4619.1	+	27133071	27133463	393	10	0.0254453	Transitional cell carcinoma
6	NC_000006.12	H2AC11	8969	CCDS4619.1	+	27133071	27133463	393	1	0.00254453	Lobular carcinoma, NOS
6	NC_000006.12	H2AC11	8969	CCDS4619.1	+	27133071	27133463	393	0	0	Acute myeloid leukemia, NOS
6	NC_000006.12	H2AC11	8969	CCDS4619.1	+	27133071	27133463	393	2	0.00508906	Mucinous adenocarcinoma
6	NC_000006.12	H2AC11	8969	CCDS4619.1	+	27133071	27133463	393	0	0	Mixed glioma
6	NC_000006.12	H2AC11	8969	CCDS4619.1	+	27133071	27133463	393	0	0	Astrocytoma, anaplastic
6	NC_000006.12	H2AC11	8969	CCDS4619.1	+	27133071	27133463	393	0	0	Renal cell carcinoma, NOS
6	NC_000006.12	H2AC11	8969	CCDS4619.1	+	27133071	27133463	393	1	0.00254453	Adenocarcinoma with mixed subtypes
6	NC_000006.12	H2AC11	8969	CCDS4619.1	+	27133071	27133463	393	0	0	Renal cell carcinoma, chromophobe type
6	NC_000006.12	H2AC11	8969	CCDS4619.1	+	27133071	27133463	393	0	0	Oligodendroglioma, NOS
6	NC_000006.12	H2AC11	8969	CCDS4619.1	+	27133071	27133463	393	0	0	Squamous cell carcinoma, keratinizing, NOS
6	NC_000006.12	H2AC11	8969	CCDS4619.1	+	27133071	27133463	393	0	0	Papillary carcinoma, follicular variant
6	NC_000006.12	H2AC11	8969	CCDS4619.1	+	27133071	27133463	393	0	0	Serous adenocarcinoma, NOS
6	NC_000006.12	H2AC11	8969	CCDS4619.1	+	27133071	27133463	393	1	0.00254453	Leiomyosarcoma, NOS
6	NC_000006.12	H2AC11	8969	CCDS4619.1	+	27133071	27133463	393	0	0	Adenocarcinoma, intestinal type
6	NC_000006.12	H2AC11	8969	CCDS4619.1	+	27133071	27133463	393	1	0.00254453	Adrenal cortical carcinoma
6	NC_000006.12	H2AC11	8969	CCDS4619.1	+	27133071	27133463	393	1	0.00254453	Tubular adenocarcinoma
6	NC_000006.12	H2AC11	8969	CCDS4619.1	+	27133071	27133463	393	0	0	Oligodendroglioma, anaplastic
6	NC_000006.12	H2AC11	8969	CCDS4619.1	+	27133071	27133463	393	0	0	Carcinoma, diffuse type
6	NC_000006.12	H2AC11	8969	CCDS4619.1	+	27133071	27133463	393	0	0	Papillary transitional cell carcinoma
6	NC_000006.12	H2AC11	8969	CCDS4619.1	+	27133071	27133463	393	0	0	Seminoma, NOS
6	NC_000006.12	H2AC11	8969	CCDS4619.1	+	27133071	27133463	393	0	0	Squamous cell carcinoma, large cell, nonkeratinizing, NOS
6	NC_000006.12	H2AC11	8969	CCDS4619.1	+	27133071	27133463	393	0	0	Astrocytoma, NOS
6	NC_000006.12	H2AC11	8969	CCDS4619.1	+	27133071	27133463	393	0	0	Dedifferentiated liposarcoma
6	NC_000006.12	H2AC11	8969	CCDS4619.1	+	27133071	27133463	393	0	0	Epithelioid mesothelioma, malignant
6	NC_000006.12	H2AC11	8969	CCDS4619.1	+	27133071	27133463	393	0	0	Cholangiocarcinoma
6	NC_000006.12	H2AC11	8969	CCDS4619.1	+	27133071	27133463	393	2	0.00508906	Malignant lymphoma, large B-cell, diffuse, NOS
6	NC_000006.12	H2AC11	8969	CCDS4619.1	+	27133071	27133463	393	0	0	Mullerian mixed tumor
6	NC_000006.12	H2AC11	8969	CCDS4619.1	+	27133071	27133463	393	0	0	Mixed epithelioid and spindle cell melanoma
6	NC_000006.12	H2AC11	8969	CCDS4619.1	+	27133071	27133463	393	0	0	Pheochromocytoma, malignant
6	NC_000006.12	H2AC11	8969	CCDS4619.1	+	27133071	27133463	393	0	0	Papillary carcinoma, columnar cell
6	NC_000006.12	H2AC11	8969	CCDS4619.1	+	27133071	27133463	393	0	0	Undifferentiated sarcoma
6	NC_000006.12	H2AC11	8969	CCDS4619.1	+	27133071	27133463	393	0	0	Thymoma, type AB, malignant
6	NC_000006.12	H2AC11	8969	CCDS4619.1	+	27133071	27133463	393	0	0	Infiltrating duct and lobular carcinoma
6	NC_000006.12	H2AC11	8969	CCDS4619.1	+	27133071	27133463	393	0	0	Mixed germ cell tumor
6	NC_000006.12	H2AC11	8969	CCDS4619.1	+	27133071	27133463	393	0	0	Basaloid squamous cell carcinoma
6	NC_000006.12	H2AC11	8969	CCDS4619.1	+	27133071	27133463	393	0	0	Thymoma, type B2, malignant
6	NC_000006.12	H2AC11	8969	CCDS4619.1	+	27133071	27133463	393	0	0	Embryonal carcinoma, NOS
6	NC_000006.12	H2AC11	8969	CCDS4619.1	+	27133071	27133463	393	0	0	Fibromyxosarcoma
6	NC_000006.12	H2AC11	8969	CCDS4619.1	+	27133071	27133463	393	0	0	Spindle cell melanoma, NOS
6	NC_000006.12	H2AC11	8969	CCDS4619.1	+	27133071	27133463	393	0	0	Acinar cell carcinoma
6	NC_000006.12	H2AC11	8969	CCDS4619.1	+	27133071	27133463	393	0	0	Mesothelioma, biphasic, malignant
6	NC_000006.12	H2AC11	8969	CCDS4619.1	+	27133071	27133463	393	0	0	Adenocarcinoma, endocervical type
6	NC_000006.12	H2AC11	8969	CCDS4619.1	+	27133071	27133463	393	1	0.00254453	Nodular melanoma
6	NC_000006.12	H2AC11	8969	CCDS4619.1	+	27133071	27133463	393	0	0	Epithelioid cell melanoma
6	NC_000006.12	H2AC11	8969	CCDS4619.1	+	27133071	27133463	393	0	0	Infiltrating duct mixed with other types of carcinoma
6	NC_000006.12	H2AC11	8969	CCDS4619.1	+	27133071	27133463	393	0	0	Bronchiolo-alveolar carcinoma, non-mucinous
6	NC_000006.12	H2AC11	8969	CCDS4619.1	+	27133071	27133463	393	0	0	Mucinous adenocarcinoma, endocervical type
6	NC_000006.12	H2AC11	8969	CCDS4619.1	+	27133071	27133463	393	0	0	Metaplastic carcinoma, NOS
6	NC_000006.12	H2AC11	8969	CCDS4619.1	+	27133071	27133463	393	0	0	Signet ring cell carcinoma
6	NC_000006.12	H2AC11	8969	CCDS4619.1	+	27133071	27133463	393	0	0	Thymoma, type A, malignant
6	NC_000006.12	H2AC11	8969	CCDS4619.1	+	27133071	27133463	393	0	0	Thymoma, type B3, malignant
6	NC_000006.12	H2AC11	8969	CCDS4619.1	+	27133071	27133463	393	0	0	Thymoma, type B1, malignant
6	NC_000006.12	H2AC11	8969	CCDS4619.1	+	27133071	27133463	393	0	0	Malignant fibrous histiocytoma
6	NC_000006.12	H2AC11	8969	CCDS4619.1	+	27133071	27133463	393	0	0	Infiltrating lobular carcinoma, NOS
6	NC_000006.12	H2AC11	8969	CCDS4619.1	+	27133071	27133463	393	0	0	Carcinosarcoma, NOS
6	NC_000006.12	H2AC11	8969	CCDS4619.1	+	27133071	27133463	393	0	0	Thymic carcinoma, NOS
1	NC_000001.11	H4C14	8370	CCDS30847.1	+	149832684	149832995	312	0	0	Pancancer
1	NC_000001.11	H4C14	8370	CCDS30847.1	+	149832684	149832995	312	0	0	Adenocarcinoma, NOS
1	NC_000001.11	H4C14	8370	CCDS30847.1	+	149832684	149832995	312	0	0	Squamous cell carcinoma, NOS
1	NC_000001.11	H4C14	8370	CCDS30847.1	+	149832684	149832995	312	0	0	Infiltrating duct carcinoma, NOS
1	NC_000001.11	H4C14	8370	CCDS30847.1	+	149832684	149832995	312	0	0	Multiple myeloma
1	NC_000001.11	H4C14	8370	CCDS30847.1	+	149832684	149832995	312	0	0	Glioblastoma
1	NC_000001.11	H4C14	8370	CCDS30847.1	+	149832684	149832995	312	0	0	Serous cystadenocarcinoma, NOS
1	NC_000001.11	H4C14	8370	CCDS30847.1	+	149832684	149832995	312	0	0	Papillary adenocarcinoma, NOS
1	NC_000001.11	H4C14	8370	CCDS30847.1	+	149832684	149832995	312	0	0	Clear cell adenocarcinoma, NOS
1	NC_000001.11	H4C14	8370	CCDS30847.1	+	149832684	149832995	312	0	0	Endometrioid adenocarcinoma, NOS
1	NC_000001.11	H4C14	8370	CCDS30847.1	+	149832684	149832995	312	0	0	Malignant melanoma, NOS
1	NC_000001.11	H4C14	8370	CCDS30847.1	+	149832684	149832995	312	0	0	Hepatocellular carcinoma, NOS
1	NC_000001.11	H4C14	8370	CCDS30847.1	+	149832684	149832995	312	0	0	Transitional cell carcinoma
1	NC_000001.11	H4C14	8370	CCDS30847.1	+	149832684	149832995	312	0	0	Lobular carcinoma, NOS
1	NC_000001.11	H4C14	8370	CCDS30847.1	+	149832684	149832995	312	0	0	Acute myeloid leukemia, NOS
1	NC_000001.11	H4C14	8370	CCDS30847.1	+	149832684	149832995	312	0	0	Mucinous adenocarcinoma
1	NC_000001.11	H4C14	8370	CCDS30847.1	+	149832684	149832995	312	0	0	Mixed glioma
1	NC_000001.11	H4C14	8370	CCDS30847.1	+	149832684	149832995	312	0	0	Astrocytoma, anaplastic
1	NC_000001.11	H4C14	8370	CCDS30847.1	+	149832684	149832995	312	0	0	Renal cell carcinoma, NOS
1	NC_000001.11	H4C14	8370	CCDS30847.1	+	149832684	149832995	312	0	0	Adenocarcinoma with mixed subtypes
1	NC_000001.11	H4C14	8370	CCDS30847.1	+	149832684	149832995	312	0	0	Renal cell carcinoma, chromophobe type
1	NC_000001.11	H4C14	8370	CCDS30847.1	+	149832684	149832995	312	0	0	Oligodendroglioma, NOS
1	NC_000001.11	H4C14	8370	CCDS30847.1	+	149832684	149832995	312	0	0	Squamous cell carcinoma, keratinizing, NOS
1	NC_000001.11	H4C14	8370	CCDS30847.1	+	149832684	149832995	312	0	0	Papillary carcinoma, follicular variant
1	NC_000001.11	H4C14	8370	CCDS30847.1	+	149832684	149832995	312	0	0	Serous adenocarcinoma, NOS
1	NC_000001.11	H4C14	8370	CCDS30847.1	+	149832684	149832995	312	0	0	Leiomyosarcoma, NOS
1	NC_000001.11	H4C14	8370	CCDS30847.1	+	149832684	149832995	312	0	0	Adenocarcinoma, intestinal type
1	NC_000001.11	H4C14	8370	CCDS30847.1	+	149832684	149832995	312	0	0	Adrenal cortical carcinoma
1	NC_000001.11	H4C14	8370	CCDS30847.1	+	149832684	149832995	312	0	0	Tubular adenocarcinoma
1	NC_000001.11	H4C14	8370	CCDS30847.1	+	149832684	149832995	312	0	0	Oligodendroglioma, anaplastic
1	NC_000001.11	H4C14	8370	CCDS30847.1	+	149832684	149832995	312	0	0	Carcinoma, diffuse type
1	NC_000001.11	H4C14	8370	CCDS30847.1	+	149832684	149832995	312	0	0	Papillary transitional cell carcinoma
1	NC_000001.11	H4C14	8370	CCDS30847.1	+	149832684	149832995	312	0	0	Seminoma, NOS
1	NC_000001.11	H4C14	8370	CCDS30847.1	+	149832684	149832995	312	0	0	Squamous cell carcinoma, large cell, nonkeratinizing, NOS
1	NC_000001.11	H4C14	8370	CCDS30847.1	+	149832684	149832995	312	0	0	Astrocytoma, NOS
1	NC_000001.11	H4C14	8370	CCDS30847.1	+	149832684	149832995	312	0	0	Dedifferentiated liposarcoma
1	NC_000001.11	H4C14	8370	CCDS30847.1	+	149832684	149832995	312	0	0	Epithelioid mesothelioma, malignant
1	NC_000001.11	H4C14	8370	CCDS30847.1	+	149832684	149832995	312	0	0	Cholangiocarcinoma
1	NC_000001.11	H4C14	8370	CCDS30847.1	+	149832684	149832995	312	0	0	Malignant lymphoma, large B-cell, diffuse, NOS
1	NC_000001.11	H4C14	8370	CCDS30847.1	+	149832684	149832995	312	0	0	Mullerian mixed tumor
1	NC_000001.11	H4C14	8370	CCDS30847.1	+	149832684	149832995	312	0	0	Mixed epithelioid and spindle cell melanoma
1	NC_000001.11	H4C14	8370	CCDS30847.1	+	149832684	149832995	312	0	0	Pheochromocytoma, malignant
1	NC_000001.11	H4C14	8370	CCDS30847.1	+	149832684	149832995	312	0	0	Papillary carcinoma, columnar cell
1	NC_000001.11	H4C14	8370	CCDS30847.1	+	149832684	149832995	312	0	0	Undifferentiated sarcoma
1	NC_000001.11	H4C14	8370	CCDS30847.1	+	149832684	149832995	312	0	0	Thymoma, type AB, malignant
1	NC_000001.11	H4C14	8370	CCDS30847.1	+	149832684	149832995	312	0	0	Infiltrating duct and lobular carcinoma
1	NC_000001.11	H4C14	8370	CCDS30847.1	+	149832684	149832995	312	0	0	Mixed germ cell tumor
1	NC_000001.11	H4C14	8370	CCDS30847.1	+	149832684	149832995	312	0	0	Basaloid squamous cell carcinoma
1	NC_000001.11	H4C14	8370	CCDS30847.1	+	149832684	149832995	312	0	0	Thymoma, type B2, malignant
1	NC_000001.11	H4C14	8370	CCDS30847.1	+	149832684	149832995	312	0	0	Embryonal carcinoma, NOS
1	NC_000001.11	H4C14	8370	CCDS30847.1	+	149832684	149832995	312	0	0	Fibromyxosarcoma
1	NC_000001.11	H4C14	8370	CCDS30847.1	+	149832684	149832995	312	0	0	Spindle cell melanoma, NOS
1	NC_000001.11	H4C14	8370	CCDS30847.1	+	149832684	149832995	312	0	0	Acinar cell carcinoma
1	NC_000001.11	H4C14	8370	CCDS30847.1	+	149832684	149832995	312	0	0	Mesothelioma, biphasic, malignant
1	NC_000001.11	H4C14	8370	CCDS30847.1	+	149832684	149832995	312	0	0	Adenocarcinoma, endocervical type
1	NC_000001.11	H4C14	8370	CCDS30847.1	+	149832684	149832995	312	0	0	Nodular melanoma
1	NC_000001.11	H4C14	8370	CCDS30847.1	+	149832684	149832995	312	0	0	Epithelioid cell melanoma
1	NC_000001.11	H4C14	8370	CCDS30847.1	+	149832684	149832995	312	0	0	Infiltrating duct mixed with other types of carcinoma
1	NC_000001.11	H4C14	8370	CCDS30847.1	+	149832684	149832995	312	0	0	Bronchiolo-alveolar carcinoma, non-mucinous
1	NC_000001.11	H4C14	8370	CCDS30847.1	+	149832684	149832995	312	0	0	Mucinous adenocarcinoma, endocervical type
1	NC_000001.11	H4C14	8370	CCDS30847.1	+	149832684	149832995	312	0	0	Metaplastic carcinoma, NOS
1	NC_000001.11	H4C14	8370	CCDS30847.1	+	149832684	149832995	312	0	0	Signet ring cell carcinoma
1	NC_000001.11	H4C14	8370	CCDS30847.1	+	149832684	149832995	312	0	0	Thymoma, type A, malignant
1	NC_000001.11	H4C14	8370	CCDS30847.1	+	149832684	149832995	312	0	0	Thymoma, type B3, malignant
1	NC_000001.11	H4C14	8370	CCDS30847.1	+	149832684	149832995	312	0	0	Thymoma, type B1, malignant
1	NC_000001.11	H4C14	8370	CCDS30847.1	+	149832684	149832995	312	0	0	Malignant fibrous histiocytoma
1	NC_000001.11	H4C14	8370	CCDS30847.1	+	149832684	149832995	312	0	0	Infiltrating lobular carcinoma, NOS
1	NC_000001.11	H4C14	8370	CCDS30847.1	+	149832684	149832995	312	0	0	Carcinosarcoma, NOS
1	NC_000001.11	H4C14	8370	CCDS30847.1	+	149832684	149832995	312	0	0	Thymic carcinoma, NOS
6	NC_000006.12	H2AC12	85235	CCDS4622.1	+	27147128	27147514	387	54	0.139535	Pancancer
6	NC_000006.12	H2AC12	85235	CCDS4622.1	+	27147128	27147514	387	10	0.0258398	Adenocarcinoma, NOS
6	NC_000006.12	H2AC12	85235	CCDS4622.1	+	27147128	27147514	387	12	0.0310078	Squamous cell carcinoma, NOS
6	NC_000006.12	H2AC12	85235	CCDS4622.1	+	27147128	27147514	387	5	0.0129199	Infiltrating duct carcinoma, NOS
6	NC_000006.12	H2AC12	85235	CCDS4622.1	+	27147128	27147514	387	4	0.0103359	Multiple myeloma
6	NC_000006.12	H2AC12	85235	CCDS4622.1	+	27147128	27147514	387	0	0	Glioblastoma
6	NC_000006.12	H2AC12	85235	CCDS4622.1	+	27147128	27147514	387	0	0	Serous cystadenocarcinoma, NOS
6	NC_000006.12	H2AC12	85235	CCDS4622.1	+	27147128	27147514	387	1	0.00258398	Papillary adenocarcinoma, NOS
6	NC_000006.12	H2AC12	85235	CCDS4622.1	+	27147128	27147514	387	1	0.00258398	Clear cell adenocarcinoma, NOS
6	NC_000006.12	H2AC12	85235	CCDS4622.1	+	27147128	27147514	387	4	0.0103359	Endometrioid adenocarcinoma, NOS
6	NC_000006.12	H2AC12	85235	CCDS4622.1	+	27147128	27147514	387	1	0.00258398	Malignant melanoma, NOS
6	NC_000006.12	H2AC12	85235	CCDS4622.1	+	27147128	27147514	387	1	0.00258398	Hepatocellular carcinoma, NOS
6	NC_000006.12	H2AC12	85235	CCDS4622.1	+	27147128	27147514	387	4	0.0103359	Transitional cell carcinoma
6	NC_000006.12	H2AC12	85235	CCDS4622.1	+	27147128	27147514	387	0	0	Lobular carcinoma, NOS
6	NC_000006.12	H2AC12	85235	CCDS4622.1	+	27147128	27147514	387	0	0	Acute myeloid leukemia, NOS
6	NC_000006.12	H2AC12	85235	CCDS4622.1	+	27147128	27147514	387	0	0	Mucinous adenocarcinoma
6	NC_000006.12	H2AC12	85235	CCDS4622.1	+	27147128	27147514	387	0	0	Mixed glioma
6	NC_000006.12	H2AC12	85235	CCDS4622.1	+	27147128	27147514	387	0	0	Astrocytoma, anaplastic
6	NC_000006.12	H2AC12	85235	CCDS4622.1	+	27147128	27147514	387	0	0	Renal cell carcinoma, NOS
6	NC_000006.12	H2AC12	85235	CCDS4622.1	+	27147128	27147514	387	1	0.00258398	Adenocarcinoma with mixed subtypes
6	NC_000006.12	H2AC12	85235	CCDS4622.1	+	27147128	27147514	387	0	0	Renal cell carcinoma, chromophobe type
6	NC_000006.12	H2AC12	85235	CCDS4622.1	+	27147128	27147514	387	0	0	Oligodendroglioma, NOS
6	NC_000006.12	H2AC12	85235	CCDS4622.1	+	27147128	27147514	387	0	0	Squamous cell carcinoma, keratinizing, NOS
6	NC_000006.12	H2AC12	85235	CCDS4622.1	+	27147128	27147514	387	0	0	Papillary carcinoma, follicular variant
6	NC_000006.12	H2AC12	85235	CCDS4622.1	+	27147128	27147514	387	0	0	Serous adenocarcinoma, NOS
6	NC_000006.12	H2AC12	85235	CCDS4622.1	+	27147128	27147514	387	0	0	Leiomyosarcoma, NOS
6	NC_000006.12	H2AC12	85235	CCDS4622.1	+	27147128	27147514	387	3	0.00775194	Adenocarcinoma, intestinal type
6	NC_000006.12	H2AC12	85235	CCDS4622.1	+	27147128	27147514	387	0	0	Adrenal cortical carcinoma
6	NC_000006.12	H2AC12	85235	CCDS4622.1	+	27147128	27147514	387	1	0.00258398	Tubular adenocarcinoma
6	NC_000006.12	H2AC12	85235	CCDS4622.1	+	27147128	27147514	387	0	0	Oligodendroglioma, anaplastic
6	NC_000006.12	H2AC12	85235	CCDS4622.1	+	27147128	27147514	387	1	0.00258398	Carcinoma, diffuse type
6	NC_000006.12	H2AC12	85235	CCDS4622.1	+	27147128	27147514	387	1	0.00258398	Papillary transitional cell carcinoma
6	NC_000006.12	H2AC12	85235	CCDS4622.1	+	27147128	27147514	387	0	0	Seminoma, NOS
6	NC_000006.12	H2AC12	85235	CCDS4622.1	+	27147128	27147514	387	1	0.00258398	Squamous cell carcinoma, large cell, nonkeratinizing, NOS
6	NC_000006.12	H2AC12	85235	CCDS4622.1	+	27147128	27147514	387	0	0	Astrocytoma, NOS
6	NC_000006.12	H2AC12	85235	CCDS4622.1	+	27147128	27147514	387	0	0	Dedifferentiated liposarcoma
6	NC_000006.12	H2AC12	85235	CCDS4622.1	+	27147128	27147514	387	0	0	Epithelioid mesothelioma, malignant
6	NC_000006.12	H2AC12	85235	CCDS4622.1	+	27147128	27147514	387	0	0	Cholangiocarcinoma
6	NC_000006.12	H2AC12	85235	CCDS4622.1	+	27147128	27147514	387	0	0	Malignant lymphoma, large B-cell, diffuse, NOS
6	NC_000006.12	H2AC12	85235	CCDS4622.1	+	27147128	27147514	387	0	0	Mullerian mixed tumor
6	NC_000006.12	H2AC12	85235	CCDS4622.1	+	27147128	27147514	387	0	0	Mixed epithelioid and spindle cell melanoma
6	NC_000006.12	H2AC12	85235	CCDS4622.1	+	27147128	27147514	387	0	0	Pheochromocytoma, malignant
6	NC_000006.12	H2AC12	85235	CCDS4622.1	+	27147128	27147514	387	0	0	Papillary carcinoma, columnar cell
6	NC_000006.12	H2AC12	85235	CCDS4622.1	+	27147128	27147514	387	0	0	Undifferentiated sarcoma
6	NC_000006.12	H2AC12	85235	CCDS4622.1	+	27147128	27147514	387	0	0	Thymoma, type AB, malignant
6	NC_000006.12	H2AC12	85235	CCDS4622.1	+	27147128	27147514	387	0	0	Infiltrating duct and lobular carcinoma
6	NC_000006.12	H2AC12	85235	CCDS4622.1	+	27147128	27147514	387	0	0	Mixed germ cell tumor
6	NC_000006.12	H2AC12	85235	CCDS4622.1	+	27147128	27147514	387	0	0	Basaloid squamous cell carcinoma
6	NC_000006.12	H2AC12	85235	CCDS4622.1	+	27147128	27147514	387	0	0	Thymoma, type B2, malignant
6	NC_000006.12	H2AC12	85235	CCDS4622.1	+	27147128	27147514	387	0	0	Embryonal carcinoma, NOS
6	NC_000006.12	H2AC12	85235	CCDS4622.1	+	27147128	27147514	387	0	0	Fibromyxosarcoma
6	NC_000006.12	H2AC12	85235	CCDS4622.1	+	27147128	27147514	387	0	0	Spindle cell melanoma, NOS
6	NC_000006.12	H2AC12	85235	CCDS4622.1	+	27147128	27147514	387	0	0	Acinar cell carcinoma
6	NC_000006.12	H2AC12	85235	CCDS4622.1	+	27147128	27147514	387	0	0	Mesothelioma, biphasic, malignant
6	NC_000006.12	H2AC12	85235	CCDS4622.1	+	27147128	27147514	387	0	0	Adenocarcinoma, endocervical type
6	NC_000006.12	H2AC12	85235	CCDS4622.1	+	27147128	27147514	387	0	0	Nodular melanoma
6	NC_000006.12	H2AC12	85235	CCDS4622.1	+	27147128	27147514	387	0	0	Epithelioid cell melanoma
6	NC_000006.12	H2AC12	85235	CCDS4622.1	+	27147128	27147514	387	0	0	Infiltrating duct mixed with other types of carcinoma
6	NC_000006.12	H2AC12	85235	CCDS4622.1	+	27147128	27147514	387	0	0	Bronchiolo-alveolar carcinoma, non-mucinous
6	NC_000006.12	H2AC12	85235	CCDS4622.1	+	27147128	27147514	387	1	0.00258398	Mucinous adenocarcinoma, endocervical type
6	NC_000006.12	H2AC12	85235	CCDS4622.1	+	27147128	27147514	387	0	0	Metaplastic carcinoma, NOS
6	NC_000006.12	H2AC12	85235	CCDS4622.1	+	27147128	27147514	387	0	0	Signet ring cell carcinoma
6	NC_000006.12	H2AC12	85235	CCDS4622.1	+	27147128	27147514	387	0	0	Thymoma, type A, malignant
6	NC_000006.12	H2AC12	85235	CCDS4622.1	+	27147128	27147514	387	0	0	Thymoma, type B3, malignant
6	NC_000006.12	H2AC12	85235	CCDS4622.1	+	27147128	27147514	387	0	0	Thymoma, type B1, malignant
6	NC_000006.12	H2AC12	85235	CCDS4622.1	+	27147128	27147514	387	0	0	Malignant fibrous histiocytoma
6	NC_000006.12	H2AC12	85235	CCDS4622.1	+	27147128	27147514	387	0	0	Infiltrating lobular carcinoma, NOS
6	NC_000006.12	H2AC12	85235	CCDS4622.1	+	27147128	27147514	387	0	0	Carcinosarcoma, NOS
6	NC_000006.12	H2AC12	85235	CCDS4622.1	+	27147128	27147514	387	0	0	Thymic carcinoma, NOS
6	NC_000006.12	H2BC9	8345	CCDS4601.1	+	26251650	26252030	381	77	0.2021	Pancancer
6	NC_000006.12	H2BC9	8345	CCDS4601.1	+	26251650	26252030	381	8	0.0209974	Adenocarcinoma, NOS
6	NC_000006.12	H2BC9	8345	CCDS4601.1	+	26251650	26252030	381	19	0.0498688	Squamous cell carcinoma, NOS
6	NC_000006.12	H2BC9	8345	CCDS4601.1	+	26251650	26252030	381	6	0.015748	Infiltrating duct carcinoma, NOS
6	NC_000006.12	H2BC9	8345	CCDS4601.1	+	26251650	26252030	381	6	0.015748	Multiple myeloma
6	NC_000006.12	H2BC9	8345	CCDS4601.1	+	26251650	26252030	381	0	0	Glioblastoma
6	NC_000006.12	H2BC9	8345	CCDS4601.1	+	26251650	26252030	381	9	0.023622	Serous cystadenocarcinoma, NOS
6	NC_000006.12	H2BC9	8345	CCDS4601.1	+	26251650	26252030	381	0	0	Papillary adenocarcinoma, NOS
6	NC_000006.12	H2BC9	8345	CCDS4601.1	+	26251650	26252030	381	1	0.00262467	Clear cell adenocarcinoma, NOS
6	NC_000006.12	H2BC9	8345	CCDS4601.1	+	26251650	26252030	381	5	0.0131234	Endometrioid adenocarcinoma, NOS
6	NC_000006.12	H2BC9	8345	CCDS4601.1	+	26251650	26252030	381	5	0.0131234	Malignant melanoma, NOS
6	NC_000006.12	H2BC9	8345	CCDS4601.1	+	26251650	26252030	381	0	0	Hepatocellular carcinoma, NOS
6	NC_000006.12	H2BC9	8345	CCDS4601.1	+	26251650	26252030	381	6	0.015748	Transitional cell carcinoma
6	NC_000006.12	H2BC9	8345	CCDS4601.1	+	26251650	26252030	381	0	0	Lobular carcinoma, NOS
6	NC_000006.12	H2BC9	8345	CCDS4601.1	+	26251650	26252030	381	0	0	Acute myeloid leukemia, NOS
6	NC_000006.12	H2BC9	8345	CCDS4601.1	+	26251650	26252030	381	0	0	Mucinous adenocarcinoma
6	NC_000006.12	H2BC9	8345	CCDS4601.1	+	26251650	26252030	381	0	0	Mixed glioma
6	NC_000006.12	H2BC9	8345	CCDS4601.1	+	26251650	26252030	381	0	0	Astrocytoma, anaplastic
6	NC_000006.12	H2BC9	8345	CCDS4601.1	+	26251650	26252030	381	0	0	Renal cell carcinoma, NOS
6	NC_000006.12	H2BC9	8345	CCDS4601.1	+	26251650	26252030	381	3	0.00787402	Adenocarcinoma with mixed subtypes
6	NC_000006.12	H2BC9	8345	CCDS4601.1	+	26251650	26252030	381	0	0	Renal cell carcinoma, chromophobe type
6	NC_000006.12	H2BC9	8345	CCDS4601.1	+	26251650	26252030	381	0	0	Oligodendroglioma, NOS
6	NC_000006.12	H2BC9	8345	CCDS4601.1	+	26251650	26252030	381	0	0	Squamous cell carcinoma, keratinizing, NOS
6	NC_000006.12	H2BC9	8345	CCDS4601.1	+	26251650	26252030	381	0	0	Papillary carcinoma, follicular variant
6	NC_000006.12	H2BC9	8345	CCDS4601.1	+	26251650	26252030	381	0	0	Serous adenocarcinoma, NOS
6	NC_000006.12	H2BC9	8345	CCDS4601.1	+	26251650	26252030	381	0	0	Leiomyosarcoma, NOS
6	NC_000006.12	H2BC9	8345	CCDS4601.1	+	26251650	26252030	381	2	0.00524934	Adenocarcinoma, intestinal type
6	NC_000006.12	H2BC9	8345	CCDS4601.1	+	26251650	26252030	381	1	0.00262467	Adrenal cortical carcinoma
6	NC_000006.12	H2BC9	8345	CCDS4601.1	+	26251650	26252030	381	1	0.00262467	Tubular adenocarcinoma
6	NC_000006.12	H2BC9	8345	CCDS4601.1	+	26251650	26252030	381	0	0	Oligodendroglioma, anaplastic
6	NC_000006.12	H2BC9	8345	CCDS4601.1	+	26251650	26252030	381	0	0	Carcinoma, diffuse type
6	NC_000006.12	H2BC9	8345	CCDS4601.1	+	26251650	26252030	381	0	0	Papillary transitional cell carcinoma
6	NC_000006.12	H2BC9	8345	CCDS4601.1	+	26251650	26252030	381	0	0	Seminoma, NOS
6	NC_000006.12	H2BC9	8345	CCDS4601.1	+	26251650	26252030	381	0	0	Squamous cell carcinoma, large cell, nonkeratinizing, NOS
6	NC_000006.12	H2BC9	8345	CCDS4601.1	+	26251650	26252030	381	0	0	Astrocytoma, NOS
6	NC_000006.12	H2BC9	8345	CCDS4601.1	+	26251650	26252030	381	0	0	Dedifferentiated liposarcoma
6	NC_000006.12	H2BC9	8345	CCDS4601.1	+	26251650	26252030	381	1	0.00262467	Epithelioid mesothelioma, malignant
6	NC_000006.12	H2BC9	8345	CCDS4601.1	+	26251650	26252030	381	1	0.00262467	Cholangiocarcinoma
6	NC_000006.12	H2BC9	8345	CCDS4601.1	+	26251650	26252030	381	0	0	Malignant lymphoma, large B-cell, diffuse, NOS
6	NC_000006.12	H2BC9	8345	CCDS4601.1	+	26251650	26252030	381	0	0	Mullerian mixed tumor
6	NC_000006.12	H2BC9	8345	CCDS4601.1	+	26251650	26252030	381	0	0	Mixed epithelioid and spindle cell melanoma
6	NC_000006.12	H2BC9	8345	CCDS4601.1	+	26251650	26252030	381	0	0	Pheochromocytoma, malignant
6	NC_000006.12	H2BC9	8345	CCDS4601.1	+	26251650	26252030	381	0	0	Papillary carcinoma, columnar cell
6	NC_000006.12	H2BC9	8345	CCDS4601.1	+	26251650	26252030	381	0	0	Undifferentiated sarcoma
6	NC_000006.12	H2BC9	8345	CCDS4601.1	+	26251650	26252030	381	0	0	Thymoma, type AB, malignant
6	NC_000006.12	H2BC9	8345	CCDS4601.1	+	26251650	26252030	381	0	0	Infiltrating duct and lobular carcinoma
6	NC_000006.12	H2BC9	8345	CCDS4601.1	+	26251650	26252030	381	0	0	Mixed germ cell tumor
6	NC_000006.12	H2BC9	8345	CCDS4601.1	+	26251650	26252030	381	0	0	Basaloid squamous cell carcinoma
6	NC_000006.12	H2BC9	8345	CCDS4601.1	+	26251650	26252030	381	0	0	Thymoma, type B2, malignant
6	NC_000006.12	H2BC9	8345	CCDS4601.1	+	26251650	26252030	381	0	0	Embryonal carcinoma, NOS
6	NC_000006.12	H2BC9	8345	CCDS4601.1	+	26251650	26252030	381	0	0	Fibromyxosarcoma
6	NC_000006.12	H2BC9	8345	CCDS4601.1	+	26251650	26252030	381	0	0	Spindle cell melanoma, NOS
6	NC_000006.12	H2BC9	8345	CCDS4601.1	+	26251650	26252030	381	1	0.00262467	Acinar cell carcinoma
6	NC_000006.12	H2BC9	8345	CCDS4601.1	+	26251650	26252030	381	0	0	Mesothelioma, biphasic, malignant
6	NC_000006.12	H2BC9	8345	CCDS4601.1	+	26251650	26252030	381	0	0	Adenocarcinoma, endocervical type
6	NC_000006.12	H2BC9	8345	CCDS4601.1	+	26251650	26252030	381	0	0	Nodular melanoma
6	NC_000006.12	H2BC9	8345	CCDS4601.1	+	26251650	26252030	381	0	0	Epithelioid cell melanoma
6	NC_000006.12	H2BC9	8345	CCDS4601.1	+	26251650	26252030	381	0	0	Infiltrating duct mixed with other types of carcinoma
6	NC_000006.12	H2BC9	8345	CCDS4601.1	+	26251650	26252030	381	0	0	Bronchiolo-alveolar carcinoma, non-mucinous
6	NC_000006.12	H2BC9	8345	CCDS4601.1	+	26251650	26252030	381	0	0	Mucinous adenocarcinoma, endocervical type
6	NC_000006.12	H2BC9	8345	CCDS4601.1	+	26251650	26252030	381	0	0	Metaplastic carcinoma, NOS
6	NC_000006.12	H2BC9	8345	CCDS4601.1	+	26251650	26252030	381	0	0	Signet ring cell carcinoma
6	NC_000006.12	H2BC9	8345	CCDS4601.1	+	26251650	26252030	381	0	0	Thymoma, type A, malignant
6	NC_000006.12	H2BC9	8345	CCDS4601.1	+	26251650	26252030	381	0	0	Thymoma, type B3, malignant
6	NC_000006.12	H2BC9	8345	CCDS4601.1	+	26251650	26252030	381	0	0	Thymoma, type B1, malignant
6	NC_000006.12	H2BC9	8345	CCDS4601.1	+	26251650	26252030	381	0	0	Malignant fibrous histiocytoma
6	NC_000006.12	H2BC9	8345	CCDS4601.1	+	26251650	26252030	381	0	0	Infiltrating lobular carcinoma, NOS
6	NC_000006.12	H2BC9	8345	CCDS4601.1	+	26251650	26252030	381	0	0	Carcinosarcoma, NOS
6	NC_000006.12	H2BC9	8345	CCDS4601.1	+	26251650	26252030	381	0	0	Thymic carcinoma, NOS
6	NC_000006.12	H2BC6	8344	CCDS4588.1	+	26183795	26184175	381	38	0.0997375	Pancancer
6	NC_000006.12	H2BC6	8344	CCDS4588.1	+	26183795	26184175	381	5	0.0131234	Adenocarcinoma, NOS
6	NC_000006.12	H2BC6	8344	CCDS4588.1	+	26183795	26184175	381	6	0.015748	Squamous cell carcinoma, NOS
6	NC_000006.12	H2BC6	8344	CCDS4588.1	+	26183795	26184175	381	3	0.00787402	Infiltrating duct carcinoma, NOS
6	NC_000006.12	H2BC6	8344	CCDS4588.1	+	26183795	26184175	381	2	0.00524934	Multiple myeloma
6	NC_000006.12	H2BC6	8344	CCDS4588.1	+	26183795	26184175	381	0	0	Glioblastoma
6	NC_000006.12	H2BC6	8344	CCDS4588.1	+	26183795	26184175	381	2	0.00524934	Serous cystadenocarcinoma, NOS
6	NC_000006.12	H2BC6	8344	CCDS4588.1	+	26183795	26184175	381	0	0	Papillary adenocarcinoma, NOS
6	NC_000006.12	H2BC6	8344	CCDS4588.1	+	26183795	26184175	381	0	0	Clear cell adenocarcinoma, NOS
6	NC_000006.12	H2BC6	8344	CCDS4588.1	+	26183795	26184175	381	4	0.0104987	Endometrioid adenocarcinoma, NOS
6	NC_000006.12	H2BC6	8344	CCDS4588.1	+	26183795	26184175	381	3	0.00787402	Malignant melanoma, NOS
6	NC_000006.12	H2BC6	8344	CCDS4588.1	+	26183795	26184175	381	1	0.00262467	Hepatocellular carcinoma, NOS
6	NC_000006.12	H2BC6	8344	CCDS4588.1	+	26183795	26184175	381	5	0.0131234	Transitional cell carcinoma
6	NC_000006.12	H2BC6	8344	CCDS4588.1	+	26183795	26184175	381	0	0	Lobular carcinoma, NOS
6	NC_000006.12	H2BC6	8344	CCDS4588.1	+	26183795	26184175	381	0	0	Acute myeloid leukemia, NOS
6	NC_000006.12	H2BC6	8344	CCDS4588.1	+	26183795	26184175	381	2	0.00524934	Mucinous adenocarcinoma
6	NC_000006.12	H2BC6	8344	CCDS4588.1	+	26183795	26184175	381	0	0	Mixed glioma
6	NC_000006.12	H2BC6	8344	CCDS4588.1	+	26183795	26184175	381	0	0	Astrocytoma, anaplastic
6	NC_000006.12	H2BC6	8344	CCDS4588.1	+	26183795	26184175	381	0	0	Renal cell carcinoma, NOS
6	NC_000006.12	H2BC6	8344	CCDS4588.1	+	26183795	26184175	381	0	0	Adenocarcinoma with mixed subtypes
6	NC_000006.12	H2BC6	8344	CCDS4588.1	+	26183795	26184175	381	0	0	Renal cell carcinoma, chromophobe type
6	NC_000006.12	H2BC6	8344	CCDS4588.1	+	26183795	26184175	381	0	0	Oligodendroglioma, NOS
6	NC_000006.12	H2BC6	8344	CCDS4588.1	+	26183795	26184175	381	0	0	Squamous cell carcinoma, keratinizing, NOS
6	NC_000006.12	H2BC6	8344	CCDS4588.1	+	26183795	26184175	381	0	0	Papillary carcinoma, follicular variant
6	NC_000006.12	H2BC6	8344	CCDS4588.1	+	26183795	26184175	381	0	0	Serous adenocarcinoma, NOS
6	NC_000006.12	H2BC6	8344	CCDS4588.1	+	26183795	26184175	381	0	0	Leiomyosarcoma, NOS
6	NC_000006.12	H2BC6	8344	CCDS4588.1	+	26183795	26184175	381	1	0.00262467	Adenocarcinoma, intestinal type
6	NC_000006.12	H2BC6	8344	CCDS4588.1	+	26183795	26184175	381	0	0	Adrenal cortical carcinoma
6	NC_000006.12	H2BC6	8344	CCDS4588.1	+	26183795	26184175	381	1	0.00262467	Tubular adenocarcinoma
6	NC_000006.12	H2BC6	8344	CCDS4588.1	+	26183795	26184175	381	0	0	Oligodendroglioma, anaplastic
6	NC_000006.12	H2BC6	8344	CCDS4588.1	+	26183795	26184175	381	0	0	Carcinoma, diffuse type
6	NC_000006.12	H2BC6	8344	CCDS4588.1	+	26183795	26184175	381	0	0	Papillary transitional cell carcinoma
6	NC_000006.12	H2BC6	8344	CCDS4588.1	+	26183795	26184175	381	0	0	Seminoma, NOS
6	NC_000006.12	H2BC6	8344	CCDS4588.1	+	26183795	26184175	381	0	0	Squamous cell carcinoma, large cell, nonkeratinizing, NOS
6	NC_000006.12	H2BC6	8344	CCDS4588.1	+	26183795	26184175	381	0	0	Astrocytoma, NOS
6	NC_000006.12	H2BC6	8344	CCDS4588.1	+	26183795	26184175	381	0	0	Dedifferentiated liposarcoma
6	NC_000006.12	H2BC6	8344	CCDS4588.1	+	26183795	26184175	381	0	0	Epithelioid mesothelioma, malignant
6	NC_000006.12	H2BC6	8344	CCDS4588.1	+	26183795	26184175	381	0	0	Cholangiocarcinoma
6	NC_000006.12	H2BC6	8344	CCDS4588.1	+	26183795	26184175	381	0	0	Malignant lymphoma, large B-cell, diffuse, NOS
6	NC_000006.12	H2BC6	8344	CCDS4588.1	+	26183795	26184175	381	0	0	Mullerian mixed tumor
6	NC_000006.12	H2BC6	8344	CCDS4588.1	+	26183795	26184175	381	0	0	Mixed epithelioid and spindle cell melanoma
6	NC_000006.12	H2BC6	8344	CCDS4588.1	+	26183795	26184175	381	0	0	Pheochromocytoma, malignant
6	NC_000006.12	H2BC6	8344	CCDS4588.1	+	26183795	26184175	381	0	0	Papillary carcinoma, columnar cell
6	NC_000006.12	H2BC6	8344	CCDS4588.1	+	26183795	26184175	381	0	0	Undifferentiated sarcoma
6	NC_000006.12	H2BC6	8344	CCDS4588.1	+	26183795	26184175	381	0	0	Thymoma, type AB, malignant
6	NC_000006.12	H2BC6	8344	CCDS4588.1	+	26183795	26184175	381	0	0	Infiltrating duct and lobular carcinoma
6	NC_000006.12	H2BC6	8344	CCDS4588.1	+	26183795	26184175	381	0	0	Mixed germ cell tumor
6	NC_000006.12	H2BC6	8344	CCDS4588.1	+	26183795	26184175	381	0	0	Basaloid squamous cell carcinoma
6	NC_000006.12	H2BC6	8344	CCDS4588.1	+	26183795	26184175	381	0	0	Thymoma, type B2, malignant
6	NC_000006.12	H2BC6	8344	CCDS4588.1	+	26183795	26184175	381	0	0	Embryonal carcinoma, NOS
6	NC_000006.12	H2BC6	8344	CCDS4588.1	+	26183795	26184175	381	0	0	Fibromyxosarcoma
6	NC_000006.12	H2BC6	8344	CCDS4588.1	+	26183795	26184175	381	0	0	Spindle cell melanoma, NOS
6	NC_000006.12	H2BC6	8344	CCDS4588.1	+	26183795	26184175	381	0	0	Acinar cell carcinoma
6	NC_000006.12	H2BC6	8344	CCDS4588.1	+	26183795	26184175	381	0	0	Mesothelioma, biphasic, malignant
6	NC_000006.12	H2BC6	8344	CCDS4588.1	+	26183795	26184175	381	0	0	Adenocarcinoma, endocervical type
6	NC_000006.12	H2BC6	8344	CCDS4588.1	+	26183795	26184175	381	0	0	Nodular melanoma
6	NC_000006.12	H2BC6	8344	CCDS4588.1	+	26183795	26184175	381	1	0.00262467	Epithelioid cell melanoma
6	NC_000006.12	H2BC6	8344	CCDS4588.1	+	26183795	26184175	381	0	0	Infiltrating duct mixed with other types of carcinoma
6	NC_000006.12	H2BC6	8344	CCDS4588.1	+	26183795	26184175	381	0	0	Bronchiolo-alveolar carcinoma, non-mucinous
6	NC_000006.12	H2BC6	8344	CCDS4588.1	+	26183795	26184175	381	0	0	Mucinous adenocarcinoma, endocervical type
6	NC_000006.12	H2BC6	8344	CCDS4588.1	+	26183795	26184175	381	0	0	Metaplastic carcinoma, NOS
6	NC_000006.12	H2BC6	8344	CCDS4588.1	+	26183795	26184175	381	0	0	Signet ring cell carcinoma
6	NC_000006.12	H2BC6	8344	CCDS4588.1	+	26183795	26184175	381	0	0	Thymoma, type A, malignant
6	NC_000006.12	H2BC6	8344	CCDS4588.1	+	26183795	26184175	381	0	0	Thymoma, type B3, malignant
6	NC_000006.12	H2BC6	8344	CCDS4588.1	+	26183795	26184175	381	0	0	Thymoma, type B1, malignant
6	NC_000006.12	H2BC6	8344	CCDS4588.1	+	26183795	26184175	381	0	0	Malignant fibrous histiocytoma
6	NC_000006.12	H2BC6	8344	CCDS4588.1	+	26183795	26184175	381	0	0	Infiltrating lobular carcinoma, NOS
6	NC_000006.12	H2BC6	8344	CCDS4588.1	+	26183795	26184175	381	0	0	Carcinosarcoma, NOS
6	NC_000006.12	H2BC6	8344	CCDS4588.1	+	26183795	26184175	381	0	0	Thymic carcinoma, NOS
6	NC_000006.12	H4C4	8360	CCDS4589.1	-	26188764	26189075	312	58	0.185897	Pancancer
6	NC_000006.12	H4C4	8360	CCDS4589.1	-	26188764	26189075	312	10	0.0320513	Adenocarcinoma, NOS
6	NC_000006.12	H4C4	8360	CCDS4589.1	-	26188764	26189075	312	7	0.0224359	Squamous cell carcinoma, NOS
6	NC_000006.12	H4C4	8360	CCDS4589.1	-	26188764	26189075	312	5	0.0160256	Infiltrating duct carcinoma, NOS
6	NC_000006.12	H4C4	8360	CCDS4589.1	-	26188764	26189075	312	2	0.00641026	Multiple myeloma
6	NC_000006.12	H4C4	8360	CCDS4589.1	-	26188764	26189075	312	0	0	Glioblastoma
6	NC_000006.12	H4C4	8360	CCDS4589.1	-	26188764	26189075	312	3	0.00961538	Serous cystadenocarcinoma, NOS
6	NC_000006.12	H4C4	8360	CCDS4589.1	-	26188764	26189075	312	0	0	Papillary adenocarcinoma, NOS
6	NC_000006.12	H4C4	8360	CCDS4589.1	-	26188764	26189075	312	0	0	Clear cell adenocarcinoma, NOS
6	NC_000006.12	H4C4	8360	CCDS4589.1	-	26188764	26189075	312	7	0.0224359	Endometrioid adenocarcinoma, NOS
6	NC_000006.12	H4C4	8360	CCDS4589.1	-	26188764	26189075	312	5	0.0160256	Malignant melanoma, NOS
6	NC_000006.12	H4C4	8360	CCDS4589.1	-	26188764	26189075	312	1	0.00320513	Hepatocellular carcinoma, NOS
6	NC_000006.12	H4C4	8360	CCDS4589.1	-	26188764	26189075	312	5	0.0160256	Transitional cell carcinoma
6	NC_000006.12	H4C4	8360	CCDS4589.1	-	26188764	26189075	312	2	0.00641026	Lobular carcinoma, NOS
6	NC_000006.12	H4C4	8360	CCDS4589.1	-	26188764	26189075	312	0	0	Acute myeloid leukemia, NOS
6	NC_000006.12	H4C4	8360	CCDS4589.1	-	26188764	26189075	312	2	0.00641026	Mucinous adenocarcinoma
6	NC_000006.12	H4C4	8360	CCDS4589.1	-	26188764	26189075	312	0	0	Mixed glioma
6	NC_000006.12	H4C4	8360	CCDS4589.1	-	26188764	26189075	312	0	0	Astrocytoma, anaplastic
6	NC_000006.12	H4C4	8360	CCDS4589.1	-	26188764	26189075	312	0	0	Renal cell carcinoma, NOS
6	NC_000006.12	H4C4	8360	CCDS4589.1	-	26188764	26189075	312	0	0	Adenocarcinoma with mixed subtypes
6	NC_000006.12	H4C4	8360	CCDS4589.1	-	26188764	26189075	312	0	0	Renal cell carcinoma, chromophobe type
6	NC_000006.12	H4C4	8360	CCDS4589.1	-	26188764	26189075	312	0	0	Oligodendroglioma, NOS
6	NC_000006.12	H4C4	8360	CCDS4589.1	-	26188764	26189075	312	1	0.00320513	Squamous cell carcinoma, keratinizing, NOS
6	NC_000006.12	H4C4	8360	CCDS4589.1	-	26188764	26189075	312	0	0	Papillary carcinoma, follicular variant
6	NC_000006.12	H4C4	8360	CCDS4589.1	-	26188764	26189075	312	0	0	Serous adenocarcinoma, NOS
6	NC_000006.12	H4C4	8360	CCDS4589.1	-	26188764	26189075	312	0	0	Leiomyosarcoma, NOS
6	NC_000006.12	H4C4	8360	CCDS4589.1	-	26188764	26189075	312	0	0	Adenocarcinoma, intestinal type
6	NC_000006.12	H4C4	8360	CCDS4589.1	-	26188764	26189075	312	0	0	Adrenal cortical carcinoma
6	NC_000006.12	H4C4	8360	CCDS4589.1	-	26188764	26189075	312	1	0.00320513	Tubular adenocarcinoma
6	NC_000006.12	H4C4	8360	CCDS4589.1	-	26188764	26189075	312	0	0	Oligodendroglioma, anaplastic
6	NC_000006.12	H4C4	8360	CCDS4589.1	-	26188764	26189075	312	1	0.00320513	Carcinoma, diffuse type
6	NC_000006.12	H4C4	8360	CCDS4589.1	-	26188764	26189075	312	0	0	Papillary transitional cell carcinoma
6	NC_000006.12	H4C4	8360	CCDS4589.1	-	26188764	26189075	312	0	0	Seminoma, NOS
6	NC_000006.12	H4C4	8360	CCDS4589.1	-	26188764	26189075	312	1	0.00320513	Squamous cell carcinoma, large cell, nonkeratinizing, NOS
6	NC_000006.12	H4C4	8360	CCDS4589.1	-	26188764	26189075	312	0	0	Astrocytoma, NOS
6	NC_000006.12	H4C4	8360	CCDS4589.1	-	26188764	26189075	312	0	0	Dedifferentiated liposarcoma
6	NC_000006.12	H4C4	8360	CCDS4589.1	-	26188764	26189075	312	1	0.00320513	Epithelioid mesothelioma, malignant
6	NC_000006.12	H4C4	8360	CCDS4589.1	-	26188764	26189075	312	0	0	Cholangiocarcinoma
6	NC_000006.12	H4C4	8360	CCDS4589.1	-	26188764	26189075	312	1	0.00320513	Malignant lymphoma, large B-cell, diffuse, NOS
6	NC_000006.12	H4C4	8360	CCDS4589.1	-	26188764	26189075	312	1	0.00320513	Mullerian mixed tumor
6	NC_000006.12	H4C4	8360	CCDS4589.1	-	26188764	26189075	312	0	0	Mixed epithelioid and spindle cell melanoma
6	NC_000006.12	H4C4	8360	CCDS4589.1	-	26188764	26189075	312	0	0	Pheochromocytoma, malignant
6	NC_000006.12	H4C4	8360	CCDS4589.1	-	26188764	26189075	312	0	0	Papillary carcinoma, columnar cell
6	NC_000006.12	H4C4	8360	CCDS4589.1	-	26188764	26189075	312	0	0	Undifferentiated sarcoma
6	NC_000006.12	H4C4	8360	CCDS4589.1	-	26188764	26189075	312	0	0	Thymoma, type AB, malignant
6	NC_000006.12	H4C4	8360	CCDS4589.1	-	26188764	26189075	312	0	0	Infiltrating duct and lobular carcinoma
6	NC_000006.12	H4C4	8360	CCDS4589.1	-	26188764	26189075	312	0	0	Mixed germ cell tumor
6	NC_000006.12	H4C4	8360	CCDS4589.1	-	26188764	26189075	312	0	0	Basaloid squamous cell carcinoma
6	NC_000006.12	H4C4	8360	CCDS4589.1	-	26188764	26189075	312	0	0	Thymoma, type B2, malignant
6	NC_000006.12	H4C4	8360	CCDS4589.1	-	26188764	26189075	312	0	0	Embryonal carcinoma, NOS
6	NC_000006.12	H4C4	8360	CCDS4589.1	-	26188764	26189075	312	0	0	Fibromyxosarcoma
6	NC_000006.12	H4C4	8360	CCDS4589.1	-	26188764	26189075	312	0	0	Spindle cell melanoma, NOS
6	NC_000006.12	H4C4	8360	CCDS4589.1	-	26188764	26189075	312	0	0	Acinar cell carcinoma
6	NC_000006.12	H4C4	8360	CCDS4589.1	-	26188764	26189075	312	0	0	Mesothelioma, biphasic, malignant
6	NC_000006.12	H4C4	8360	CCDS4589.1	-	26188764	26189075	312	0	0	Adenocarcinoma, endocervical type
6	NC_000006.12	H4C4	8360	CCDS4589.1	-	26188764	26189075	312	0	0	Nodular melanoma
6	NC_000006.12	H4C4	8360	CCDS4589.1	-	26188764	26189075	312	0	0	Epithelioid cell melanoma
6	NC_000006.12	H4C4	8360	CCDS4589.1	-	26188764	26189075	312	0	0	Infiltrating duct mixed with other types of carcinoma
6	NC_000006.12	H4C4	8360	CCDS4589.1	-	26188764	26189075	312	0	0	Bronchiolo-alveolar carcinoma, non-mucinous
6	NC_000006.12	H4C4	8360	CCDS4589.1	-	26188764	26189075	312	0	0	Mucinous adenocarcinoma, endocervical type
6	NC_000006.12	H4C4	8360	CCDS4589.1	-	26188764	26189075	312	0	0	Metaplastic carcinoma, NOS
6	NC_000006.12	H4C4	8360	CCDS4589.1	-	26188764	26189075	312	0	0	Signet ring cell carcinoma
6	NC_000006.12	H4C4	8360	CCDS4589.1	-	26188764	26189075	312	0	0	Thymoma, type A, malignant
6	NC_000006.12	H4C4	8360	CCDS4589.1	-	26188764	26189075	312	0	0	Thymoma, type B3, malignant
6	NC_000006.12	H4C4	8360	CCDS4589.1	-	26188764	26189075	312	0	0	Thymoma, type B1, malignant
6	NC_000006.12	H4C4	8360	CCDS4589.1	-	26188764	26189075	312	0	0	Malignant fibrous histiocytoma
6	NC_000006.12	H4C4	8360	CCDS4589.1	-	26188764	26189075	312	0	0	Infiltrating lobular carcinoma, NOS
6	NC_000006.12	H4C4	8360	CCDS4589.1	-	26188764	26189075	312	0	0	Carcinosarcoma, NOS
6	NC_000006.12	H4C4	8360	CCDS4589.1	-	26188764	26189075	312	0	0	Thymic carcinoma, NOS
6	NC_000006.12	H2BC13	8340	CCDS4625.1	-	27807525	27807905	381	47	0.12336	Pancancer
6	NC_000006.12	H2BC13	8340	CCDS4625.1	-	27807525	27807905	381	10	0.0262467	Adenocarcinoma, NOS
6	NC_000006.12	H2BC13	8340	CCDS4625.1	-	27807525	27807905	381	5	0.0131234	Squamous cell carcinoma, NOS
6	NC_000006.12	H2BC13	8340	CCDS4625.1	-	27807525	27807905	381	3	0.00787402	Infiltrating duct carcinoma, NOS
6	NC_000006.12	H2BC13	8340	CCDS4625.1	-	27807525	27807905	381	3	0.00787402	Multiple myeloma
6	NC_000006.12	H2BC13	8340	CCDS4625.1	-	27807525	27807905	381	1	0.00262467	Glioblastoma
6	NC_000006.12	H2BC13	8340	CCDS4625.1	-	27807525	27807905	381	3	0.00787402	Serous cystadenocarcinoma, NOS
6	NC_000006.12	H2BC13	8340	CCDS4625.1	-	27807525	27807905	381	4	0.0104987	Papillary adenocarcinoma, NOS
6	NC_000006.12	H2BC13	8340	CCDS4625.1	-	27807525	27807905	381	1	0.00262467	Clear cell adenocarcinoma, NOS
6	NC_000006.12	H2BC13	8340	CCDS4625.1	-	27807525	27807905	381	5	0.0131234	Endometrioid adenocarcinoma, NOS
6	NC_000006.12	H2BC13	8340	CCDS4625.1	-	27807525	27807905	381	1	0.00262467	Malignant melanoma, NOS
6	NC_000006.12	H2BC13	8340	CCDS4625.1	-	27807525	27807905	381	1	0.00262467	Hepatocellular carcinoma, NOS
6	NC_000006.12	H2BC13	8340	CCDS4625.1	-	27807525	27807905	381	2	0.00524934	Transitional cell carcinoma
6	NC_000006.12	H2BC13	8340	CCDS4625.1	-	27807525	27807905	381	0	0	Lobular carcinoma, NOS
6	NC_000006.12	H2BC13	8340	CCDS4625.1	-	27807525	27807905	381	0	0	Acute myeloid leukemia, NOS
6	NC_000006.12	H2BC13	8340	CCDS4625.1	-	27807525	27807905	381	1	0.00262467	Mucinous adenocarcinoma
6	NC_000006.12	H2BC13	8340	CCDS4625.1	-	27807525	27807905	381	0	0	Mixed glioma
6	NC_000006.12	H2BC13	8340	CCDS4625.1	-	27807525	27807905	381	0	0	Astrocytoma, anaplastic
6	NC_000006.12	H2BC13	8340	CCDS4625.1	-	27807525	27807905	381	0	0	Renal cell carcinoma, NOS
6	NC_000006.12	H2BC13	8340	CCDS4625.1	-	27807525	27807905	381	0	0	Adenocarcinoma with mixed subtypes
6	NC_000006.12	H2BC13	8340	CCDS4625.1	-	27807525	27807905	381	0	0	Renal cell carcinoma, chromophobe type
6	NC_000006.12	H2BC13	8340	CCDS4625.1	-	27807525	27807905	381	0	0	Oligodendroglioma, NOS
6	NC_000006.12	H2BC13	8340	CCDS4625.1	-	27807525	27807905	381	1	0.00262467	Squamous cell carcinoma, keratinizing, NOS
6	NC_000006.12	H2BC13	8340	CCDS4625.1	-	27807525	27807905	381	0	0	Papillary carcinoma, follicular variant
6	NC_000006.12	H2BC13	8340	CCDS4625.1	-	27807525	27807905	381	1	0.00262467	Serous adenocarcinoma, NOS
6	NC_000006.12	H2BC13	8340	CCDS4625.1	-	27807525	27807905	381	0	0	Leiomyosarcoma, NOS
6	NC_000006.12	H2BC13	8340	CCDS4625.1	-	27807525	27807905	381	0	0	Adenocarcinoma, intestinal type
6	NC_000006.12	H2BC13	8340	CCDS4625.1	-	27807525	27807905	381	0	0	Adrenal cortical carcinoma
6	NC_000006.12	H2BC13	8340	CCDS4625.1	-	27807525	27807905	381	0	0	Tubular adenocarcinoma
6	NC_000006.12	H2BC13	8340	CCDS4625.1	-	27807525	27807905	381	0	0	Oligodendroglioma, anaplastic
6	NC_000006.12	H2BC13	8340	CCDS4625.1	-	27807525	27807905	381	0	0	Carcinoma, diffuse type
6	NC_000006.12	H2BC13	8340	CCDS4625.1	-	27807525	27807905	381	0	0	Papillary transitional cell carcinoma
6	NC_000006.12	H2BC13	8340	CCDS4625.1	-	27807525	27807905	381	0	0	Seminoma, NOS
6	NC_000006.12	H2BC13	8340	CCDS4625.1	-	27807525	27807905	381	0	0	Squamous cell carcinoma, large cell, nonkeratinizing, NOS
6	NC_000006.12	H2BC13	8340	CCDS4625.1	-	27807525	27807905	381	0	0	Astrocytoma, NOS
6	NC_000006.12	H2BC13	8340	CCDS4625.1	-	27807525	27807905	381	0	0	Dedifferentiated liposarcoma
6	NC_000006.12	H2BC13	8340	CCDS4625.1	-	27807525	27807905	381	0	0	Epithelioid mesothelioma, malignant
6	NC_000006.12	H2BC13	8340	CCDS4625.1	-	27807525	27807905	381	0	0	Cholangiocarcinoma
6	NC_000006.12	H2BC13	8340	CCDS4625.1	-	27807525	27807905	381	3	0.00787402	Malignant lymphoma, large B-cell, diffuse, NOS
6	NC_000006.12	H2BC13	8340	CCDS4625.1	-	27807525	27807905	381	0	0	Mullerian mixed tumor
6	NC_000006.12	H2BC13	8340	CCDS4625.1	-	27807525	27807905	381	0	0	Mixed epithelioid and spindle cell melanoma
6	NC_000006.12	H2BC13	8340	CCDS4625.1	-	27807525	27807905	381	0	0	Pheochromocytoma, malignant
6	NC_000006.12	H2BC13	8340	CCDS4625.1	-	27807525	27807905	381	0	0	Papillary carcinoma, columnar cell
6	NC_000006.12	H2BC13	8340	CCDS4625.1	-	27807525	27807905	381	0	0	Undifferentiated sarcoma
6	NC_000006.12	H2BC13	8340	CCDS4625.1	-	27807525	27807905	381	0	0	Thymoma, type AB, malignant
6	NC_000006.12	H2BC13	8340	CCDS4625.1	-	27807525	27807905	381	0	0	Infiltrating duct and lobular carcinoma
6	NC_000006.12	H2BC13	8340	CCDS4625.1	-	27807525	27807905	381	0	0	Mixed germ cell tumor
6	NC_000006.12	H2BC13	8340	CCDS4625.1	-	27807525	27807905	381	1	0.00262467	Basaloid squamous cell carcinoma
6	NC_000006.12	H2BC13	8340	CCDS4625.1	-	27807525	27807905	381	0	0	Thymoma, type B2, malignant
6	NC_000006.12	H2BC13	8340	CCDS4625.1	-	27807525	27807905	381	0	0	Embryonal carcinoma, NOS
6	NC_000006.12	H2BC13	8340	CCDS4625.1	-	27807525	27807905	381	0	0	Fibromyxosarcoma
6	NC_000006.12	H2BC13	8340	CCDS4625.1	-	27807525	27807905	381	0	0	Spindle cell melanoma, NOS
6	NC_000006.12	H2BC13	8340	CCDS4625.1	-	27807525	27807905	381	0	0	Acinar cell carcinoma
6	NC_000006.12	H2BC13	8340	CCDS4625.1	-	27807525	27807905	381	0	0	Mesothelioma, biphasic, malignant
6	NC_000006.12	H2BC13	8340	CCDS4625.1	-	27807525	27807905	381	0	0	Adenocarcinoma, endocervical type
6	NC_000006.12	H2BC13	8340	CCDS4625.1	-	27807525	27807905	381	0	0	Nodular melanoma
6	NC_000006.12	H2BC13	8340	CCDS4625.1	-	27807525	27807905	381	0	0	Epithelioid cell melanoma
6	NC_000006.12	H2BC13	8340	CCDS4625.1	-	27807525	27807905	381	0	0	Infiltrating duct mixed with other types of carcinoma
6	NC_000006.12	H2BC13	8340	CCDS4625.1	-	27807525	27807905	381	0	0	Bronchiolo-alveolar carcinoma, non-mucinous
6	NC_000006.12	H2BC13	8340	CCDS4625.1	-	27807525	27807905	381	0	0	Mucinous adenocarcinoma, endocervical type
6	NC_000006.12	H2BC13	8340	CCDS4625.1	-	27807525	27807905	381	0	0	Metaplastic carcinoma, NOS
6	NC_000006.12	H2BC13	8340	CCDS4625.1	-	27807525	27807905	381	0	0	Signet ring cell carcinoma
6	NC_000006.12	H2BC13	8340	CCDS4625.1	-	27807525	27807905	381	0	0	Thymoma, type A, malignant
6	NC_000006.12	H2BC13	8340	CCDS4625.1	-	27807525	27807905	381	0	0	Thymoma, type B3, malignant
6	NC_000006.12	H2BC13	8340	CCDS4625.1	-	27807525	27807905	381	0	0	Thymoma, type B1, malignant
6	NC_000006.12	H2BC13	8340	CCDS4625.1	-	27807525	27807905	381	0	0	Malignant fibrous histiocytoma
6	NC_000006.12	H2BC13	8340	CCDS4625.1	-	27807525	27807905	381	0	0	Infiltrating lobular carcinoma, NOS
6	NC_000006.12	H2BC13	8340	CCDS4625.1	-	27807525	27807905	381	0	0	Carcinosarcoma, NOS
6	NC_000006.12	H2BC13	8340	CCDS4625.1	-	27807525	27807905	381	0	0	Thymic carcinoma, NOS
6	NC_000006.12	H3C10	8357	CCDS4627.1	+	27810073	27810483	411	44	0.107056	Pancancer
6	NC_000006.12	H3C10	8357	CCDS4627.1	+	27810073	27810483	411	7	0.0170316	Adenocarcinoma, NOS
6	NC_000006.12	H3C10	8357	CCDS4627.1	+	27810073	27810483	411	9	0.0218978	Squamous cell carcinoma, NOS
6	NC_000006.12	H3C10	8357	CCDS4627.1	+	27810073	27810483	411	2	0.00486618	Infiltrating duct carcinoma, NOS
6	NC_000006.12	H3C10	8357	CCDS4627.1	+	27810073	27810483	411	7	0.0170316	Multiple myeloma
6	NC_000006.12	H3C10	8357	CCDS4627.1	+	27810073	27810483	411	0	0	Glioblastoma
6	NC_000006.12	H3C10	8357	CCDS4627.1	+	27810073	27810483	411	3	0.00729927	Serous cystadenocarcinoma, NOS
6	NC_000006.12	H3C10	8357	CCDS4627.1	+	27810073	27810483	411	1	0.00243309	Papillary adenocarcinoma, NOS
6	NC_000006.12	H3C10	8357	CCDS4627.1	+	27810073	27810483	411	0	0	Clear cell adenocarcinoma, NOS
6	NC_000006.12	H3C10	8357	CCDS4627.1	+	27810073	27810483	411	2	0.00486618	Endometrioid adenocarcinoma, NOS
6	NC_000006.12	H3C10	8357	CCDS4627.1	+	27810073	27810483	411	1	0.00243309	Malignant melanoma, NOS
6	NC_000006.12	H3C10	8357	CCDS4627.1	+	27810073	27810483	411	1	0.00243309	Hepatocellular carcinoma, NOS
6	NC_000006.12	H3C10	8357	CCDS4627.1	+	27810073	27810483	411	5	0.0121655	Transitional cell carcinoma
6	NC_000006.12	H3C10	8357	CCDS4627.1	+	27810073	27810483	411	0	0	Lobular carcinoma, NOS
6	NC_000006.12	H3C10	8357	CCDS4627.1	+	27810073	27810483	411	0	0	Acute myeloid leukemia, NOS
6	NC_000006.12	H3C10	8357	CCDS4627.1	+	27810073	27810483	411	0	0	Mucinous adenocarcinoma
6	NC_000006.12	H3C10	8357	CCDS4627.1	+	27810073	27810483	411	0	0	Mixed glioma
6	NC_000006.12	H3C10	8357	CCDS4627.1	+	27810073	27810483	411	0	0	Astrocytoma, anaplastic
6	NC_000006.12	H3C10	8357	CCDS4627.1	+	27810073	27810483	411	0	0	Renal cell carcinoma, NOS
6	NC_000006.12	H3C10	8357	CCDS4627.1	+	27810073	27810483	411	0	0	Adenocarcinoma with mixed subtypes
6	NC_000006.12	H3C10	8357	CCDS4627.1	+	27810073	27810483	411	0	0	Renal cell carcinoma, chromophobe type
6	NC_000006.12	H3C10	8357	CCDS4627.1	+	27810073	27810483	411	0	0	Oligodendroglioma, NOS
6	NC_000006.12	H3C10	8357	CCDS4627.1	+	27810073	27810483	411	0	0	Squamous cell carcinoma, keratinizing, NOS
6	NC_000006.12	H3C10	8357	CCDS4627.1	+	27810073	27810483	411	0	0	Papillary carcinoma, follicular variant
6	NC_000006.12	H3C10	8357	CCDS4627.1	+	27810073	27810483	411	0	0	Serous adenocarcinoma, NOS
6	NC_000006.12	H3C10	8357	CCDS4627.1	+	27810073	27810483	411	0	0	Leiomyosarcoma, NOS
6	NC_000006.12	H3C10	8357	CCDS4627.1	+	27810073	27810483	411	0	0	Adenocarcinoma, intestinal type
6	NC_000006.12	H3C10	8357	CCDS4627.1	+	27810073	27810483	411	1	0.00243309	Adrenal cortical carcinoma
6	NC_000006.12	H3C10	8357	CCDS4627.1	+	27810073	27810483	411	0	0	Tubular adenocarcinoma
6	NC_000006.12	H3C10	8357	CCDS4627.1	+	27810073	27810483	411	0	0	Oligodendroglioma, anaplastic
6	NC_000006.12	H3C10	8357	CCDS4627.1	+	27810073	27810483	411	0	0	Carcinoma, diffuse type
6	NC_000006.12	H3C10	8357	CCDS4627.1	+	27810073	27810483	411	0	0	Papillary transitional cell carcinoma
6	NC_000006.12	H3C10	8357	CCDS4627.1	+	27810073	27810483	411	0	0	Seminoma, NOS
6	NC_000006.12	H3C10	8357	CCDS4627.1	+	27810073	27810483	411	1	0.00243309	Squamous cell carcinoma, large cell, nonkeratinizing, NOS
6	NC_000006.12	H3C10	8357	CCDS4627.1	+	27810073	27810483	411	0	0	Astrocytoma, NOS
6	NC_000006.12	H3C10	8357	CCDS4627.1	+	27810073	27810483	411	1	0.00243309	Dedifferentiated liposarcoma
6	NC_000006.12	H3C10	8357	CCDS4627.1	+	27810073	27810483	411	0	0	Epithelioid mesothelioma, malignant
6	NC_000006.12	H3C10	8357	CCDS4627.1	+	27810073	27810483	411	0	0	Cholangiocarcinoma
6	NC_000006.12	H3C10	8357	CCDS4627.1	+	27810073	27810483	411	0	0	Malignant lymphoma, large B-cell, diffuse, NOS
6	NC_000006.12	H3C10	8357	CCDS4627.1	+	27810073	27810483	411	0	0	Mullerian mixed tumor
6	NC_000006.12	H3C10	8357	CCDS4627.1	+	27810073	27810483	411	0	0	Mixed epithelioid and spindle cell melanoma
6	NC_000006.12	H3C10	8357	CCDS4627.1	+	27810073	27810483	411	0	0	Pheochromocytoma, malignant
6	NC_000006.12	H3C10	8357	CCDS4627.1	+	27810073	27810483	411	0	0	Papillary carcinoma, columnar cell
6	NC_000006.12	H3C10	8357	CCDS4627.1	+	27810073	27810483	411	0	0	Undifferentiated sarcoma
6	NC_000006.12	H3C10	8357	CCDS4627.1	+	27810073	27810483	411	0	0	Thymoma, type AB, malignant
6	NC_000006.12	H3C10	8357	CCDS4627.1	+	27810073	27810483	411	0	0	Infiltrating duct and lobular carcinoma
6	NC_000006.12	H3C10	8357	CCDS4627.1	+	27810073	27810483	411	0	0	Mixed germ cell tumor
6	NC_000006.12	H3C10	8357	CCDS4627.1	+	27810073	27810483	411	0	0	Basaloid squamous cell carcinoma
6	NC_000006.12	H3C10	8357	CCDS4627.1	+	27810073	27810483	411	0	0	Thymoma, type B2, malignant
6	NC_000006.12	H3C10	8357	CCDS4627.1	+	27810073	27810483	411	0	0	Embryonal carcinoma, NOS
6	NC_000006.12	H3C10	8357	CCDS4627.1	+	27810073	27810483	411	0	0	Fibromyxosarcoma
6	NC_000006.12	H3C10	8357	CCDS4627.1	+	27810073	27810483	411	0	0	Spindle cell melanoma, NOS
6	NC_000006.12	H3C10	8357	CCDS4627.1	+	27810073	27810483	411	0	0	Acinar cell carcinoma
6	NC_000006.12	H3C10	8357	CCDS4627.1	+	27810073	27810483	411	0	0	Mesothelioma, biphasic, malignant
6	NC_000006.12	H3C10	8357	CCDS4627.1	+	27810073	27810483	411	0	0	Adenocarcinoma, endocervical type
6	NC_000006.12	H3C10	8357	CCDS4627.1	+	27810073	27810483	411	0	0	Nodular melanoma
6	NC_000006.12	H3C10	8357	CCDS4627.1	+	27810073	27810483	411	0	0	Epithelioid cell melanoma
6	NC_000006.12	H3C10	8357	CCDS4627.1	+	27810073	27810483	411	0	0	Infiltrating duct mixed with other types of carcinoma
6	NC_000006.12	H3C10	8357	CCDS4627.1	+	27810073	27810483	411	1	0.00243309	Bronchiolo-alveolar carcinoma, non-mucinous
6	NC_000006.12	H3C10	8357	CCDS4627.1	+	27810073	27810483	411	0	0	Mucinous adenocarcinoma, endocervical type
6	NC_000006.12	H3C10	8357	CCDS4627.1	+	27810073	27810483	411	0	0	Metaplastic carcinoma, NOS
6	NC_000006.12	H3C10	8357	CCDS4627.1	+	27810073	27810483	411	1	0.00243309	Signet ring cell carcinoma
6	NC_000006.12	H3C10	8357	CCDS4627.1	+	27810073	27810483	411	0	0	Thymoma, type A, malignant
6	NC_000006.12	H3C10	8357	CCDS4627.1	+	27810073	27810483	411	0	0	Thymoma, type B3, malignant
6	NC_000006.12	H3C10	8357	CCDS4627.1	+	27810073	27810483	411	0	0	Thymoma, type B1, malignant
6	NC_000006.12	H3C10	8357	CCDS4627.1	+	27810073	27810483	411	0	0	Malignant fibrous histiocytoma
6	NC_000006.12	H3C10	8357	CCDS4627.1	+	27810073	27810483	411	0	0	Infiltrating lobular carcinoma, NOS
6	NC_000006.12	H3C10	8357	CCDS4627.1	+	27810073	27810483	411	0	0	Carcinosarcoma, NOS
6	NC_000006.12	H3C10	8357	CCDS4627.1	+	27810073	27810483	411	0	0	Thymic carcinoma, NOS
1	NC_000001.11	H3C13	653604	CCDS41388.1	-	149813270	149813680	411	59	0.143552	Pancancer
1	NC_000001.11	H3C13	653604	CCDS41388.1	-	149813270	149813680	411	6	0.0145985	Adenocarcinoma, NOS
1	NC_000001.11	H3C13	653604	CCDS41388.1	-	149813270	149813680	411	17	0.0413625	Squamous cell carcinoma, NOS
1	NC_000001.11	H3C13	653604	CCDS41388.1	-	149813270	149813680	411	6	0.0145985	Infiltrating duct carcinoma, NOS
1	NC_000001.11	H3C13	653604	CCDS41388.1	-	149813270	149813680	411	2	0.00486618	Multiple myeloma
1	NC_000001.11	H3C13	653604	CCDS41388.1	-	149813270	149813680	411	1	0.00243309	Glioblastoma
1	NC_000001.11	H3C13	653604	CCDS41388.1	-	149813270	149813680	411	2	0.00486618	Serous cystadenocarcinoma, NOS
1	NC_000001.11	H3C13	653604	CCDS41388.1	-	149813270	149813680	411	0	0	Papillary adenocarcinoma, NOS
1	NC_000001.11	H3C13	653604	CCDS41388.1	-	149813270	149813680	411	0	0	Clear cell adenocarcinoma, NOS
1	NC_000001.11	H3C13	653604	CCDS41388.1	-	149813270	149813680	411	3	0.00729927	Endometrioid adenocarcinoma, NOS
1	NC_000001.11	H3C13	653604	CCDS41388.1	-	149813270	149813680	411	4	0.00973236	Malignant melanoma, NOS
1	NC_000001.11	H3C13	653604	CCDS41388.1	-	149813270	149813680	411	1	0.00243309	Hepatocellular carcinoma, NOS
1	NC_000001.11	H3C13	653604	CCDS41388.1	-	149813270	149813680	411	3	0.00729927	Transitional cell carcinoma
1	NC_000001.11	H3C13	653604	CCDS41388.1	-	149813270	149813680	411	2	0.00486618	Lobular carcinoma, NOS
1	NC_000001.11	H3C13	653604	CCDS41388.1	-	149813270	149813680	411	0	0	Acute myeloid leukemia, NOS
1	NC_000001.11	H3C13	653604	CCDS41388.1	-	149813270	149813680	411	0	0	Mucinous adenocarcinoma
1	NC_000001.11	H3C13	653604	CCDS41388.1	-	149813270	149813680	411	0	0	Mixed glioma
1	NC_000001.11	H3C13	653604	CCDS41388.1	-	149813270	149813680	411	1	0.00243309	Astrocytoma, anaplastic
1	NC_000001.11	H3C13	653604	CCDS41388.1	-	149813270	149813680	411	1	0.00243309	Renal cell carcinoma, NOS
1	NC_000001.11	H3C13	653604	CCDS41388.1	-	149813270	149813680	411	0	0	Adenocarcinoma with mixed subtypes
1	NC_000001.11	H3C13	653604	CCDS41388.1	-	149813270	149813680	411	0	0	Renal cell carcinoma, chromophobe type
1	NC_000001.11	H3C13	653604	CCDS41388.1	-	149813270	149813680	411	0	0	Oligodendroglioma, NOS
1	NC_000001.11	H3C13	653604	CCDS41388.1	-	149813270	149813680	411	1	0.00243309	Squamous cell carcinoma, keratinizing, NOS
1	NC_000001.11	H3C13	653604	CCDS41388.1	-	149813270	149813680	411	2	0.00486618	Papillary carcinoma, follicular variant
1	NC_000001.11	H3C13	653604	CCDS41388.1	-	149813270	149813680	411	0	0	Serous adenocarcinoma, NOS
1	NC_000001.11	H3C13	653604	CCDS41388.1	-	149813270	149813680	411	0	0	Leiomyosarcoma, NOS
1	NC_000001.11	H3C13	653604	CCDS41388.1	-	149813270	149813680	411	2	0.00486618	Adenocarcinoma, intestinal type
1	NC_000001.11	H3C13	653604	CCDS41388.1	-	149813270	149813680	411	0	0	Adrenal cortical carcinoma
1	NC_000001.11	H3C13	653604	CCDS41388.1	-	149813270	149813680	411	0	0	Tubular adenocarcinoma
1	NC_000001.11	H3C13	653604	CCDS41388.1	-	149813270	149813680	411	0	0	Oligodendroglioma, anaplastic
1	NC_000001.11	H3C13	653604	CCDS41388.1	-	149813270	149813680	411	1	0.00243309	Carcinoma, diffuse type
1	NC_000001.11	H3C13	653604	CCDS41388.1	-	149813270	149813680	411	0	0	Papillary transitional cell carcinoma
1	NC_000001.11	H3C13	653604	CCDS41388.1	-	149813270	149813680	411	0	0	Seminoma, NOS
1	NC_000001.11	H3C13	653604	CCDS41388.1	-	149813270	149813680	411	0	0	Squamous cell carcinoma, large cell, nonkeratinizing, NOS
1	NC_000001.11	H3C13	653604	CCDS41388.1	-	149813270	149813680	411	0	0	Astrocytoma, NOS
1	NC_000001.11	H3C13	653604	CCDS41388.1	-	149813270	149813680	411	0	0	Dedifferentiated liposarcoma
1	NC_000001.11	H3C13	653604	CCDS41388.1	-	149813270	149813680	411	0	0	Epithelioid mesothelioma, malignant
1	NC_000001.11	H3C13	653604	CCDS41388.1	-	149813270	149813680	411	0	0	Cholangiocarcinoma
1	NC_000001.11	H3C13	653604	CCDS41388.1	-	149813270	149813680	411	1	0.00243309	Malignant lymphoma, large B-cell, diffuse, NOS
1	NC_000001.11	H3C13	653604	CCDS41388.1	-	149813270	149813680	411	0	0	Mullerian mixed tumor
1	NC_000001.11	H3C13	653604	CCDS41388.1	-	149813270	149813680	411	0	0	Mixed epithelioid and spindle cell melanoma
1	NC_000001.11	H3C13	653604	CCDS41388.1	-	149813270	149813680	411	0	0	Pheochromocytoma, malignant
1	NC_000001.11	H3C13	653604	CCDS41388.1	-	149813270	149813680	411	0	0	Papillary carcinoma, columnar cell
1	NC_000001.11	H3C13	653604	CCDS41388.1	-	149813270	149813680	411	0	0	Undifferentiated sarcoma
1	NC_000001.11	H3C13	653604	CCDS41388.1	-	149813270	149813680	411	0	0	Thymoma, type AB, malignant
1	NC_000001.11	H3C13	653604	CCDS41388.1	-	149813270	149813680	411	0	0	Infiltrating duct and lobular carcinoma
1	NC_000001.11	H3C13	653604	CCDS41388.1	-	149813270	149813680	411	0	0	Mixed germ cell tumor
1	NC_000001.11	H3C13	653604	CCDS41388.1	-	149813270	149813680	411	0	0	Basaloid squamous cell carcinoma
1	NC_000001.11	H3C13	653604	CCDS41388.1	-	149813270	149813680	411	0	0	Thymoma, type B2, malignant
1	NC_000001.11	H3C13	653604	CCDS41388.1	-	149813270	149813680	411	0	0	Embryonal carcinoma, NOS
1	NC_000001.11	H3C13	653604	CCDS41388.1	-	149813270	149813680	411	0	0	Fibromyxosarcoma
1	NC_000001.11	H3C13	653604	CCDS41388.1	-	149813270	149813680	411	0	0	Spindle cell melanoma, NOS
1	NC_000001.11	H3C13	653604	CCDS41388.1	-	149813270	149813680	411	0	0	Acinar cell carcinoma
1	NC_000001.11	H3C13	653604	CCDS41388.1	-	149813270	149813680	411	0	0	Mesothelioma, biphasic, malignant
1	NC_000001.11	H3C13	653604	CCDS41388.1	-	149813270	149813680	411	0	0	Adenocarcinoma, endocervical type
1	NC_000001.11	H3C13	653604	CCDS41388.1	-	149813270	149813680	411	0	0	Nodular melanoma
1	NC_000001.11	H3C13	653604	CCDS41388.1	-	149813270	149813680	411	0	0	Epithelioid cell melanoma
1	NC_000001.11	H3C13	653604	CCDS41388.1	-	149813270	149813680	411	0	0	Infiltrating duct mixed with other types of carcinoma
1	NC_000001.11	H3C13	653604	CCDS41388.1	-	149813270	149813680	411	0	0	Bronchiolo-alveolar carcinoma, non-mucinous
1	NC_000001.11	H3C13	653604	CCDS41388.1	-	149813270	149813680	411	0	0	Mucinous adenocarcinoma, endocervical type
1	NC_000001.11	H3C13	653604	CCDS41388.1	-	149813270	149813680	411	1	0.00243309	Metaplastic carcinoma, NOS
1	NC_000001.11	H3C13	653604	CCDS41388.1	-	149813270	149813680	411	0	0	Signet ring cell carcinoma
1	NC_000001.11	H3C13	653604	CCDS41388.1	-	149813270	149813680	411	0	0	Thymoma, type A, malignant
1	NC_000001.11	H3C13	653604	CCDS41388.1	-	149813270	149813680	411	0	0	Thymoma, type B3, malignant
1	NC_000001.11	H3C13	653604	CCDS41388.1	-	149813270	149813680	411	0	0	Thymoma, type B1, malignant
1	NC_000001.11	H3C13	653604	CCDS41388.1	-	149813270	149813680	411	0	0	Malignant fibrous histiocytoma
1	NC_000001.11	H3C13	653604	CCDS41388.1	-	149813270	149813680	411	0	0	Infiltrating lobular carcinoma, NOS
1	NC_000001.11	H3C13	653604	CCDS41388.1	-	149813270	149813680	411	0	0	Carcinosarcoma, NOS
1	NC_000001.11	H3C13	653604	CCDS41388.1	-	149813270	149813680	411	0	0	Thymic carcinoma, NOS
1	NC_000001.11	H2AC20	8338	CCDS937.1	+	149886974	149887363	390	88	0.225641	Pancancer
1	NC_000001.11	H2AC20	8338	CCDS937.1	+	149886974	149887363	390	24	0.0615385	Adenocarcinoma, NOS
1	NC_000001.11	H2AC20	8338	CCDS937.1	+	149886974	149887363	390	14	0.0358974	Squamous cell carcinoma, NOS
1	NC_000001.11	H2AC20	8338	CCDS937.1	+	149886974	149887363	390	12	0.0307692	Infiltrating duct carcinoma, NOS
1	NC_000001.11	H2AC20	8338	CCDS937.1	+	149886974	149887363	390	3	0.00769231	Multiple myeloma
1	NC_000001.11	H2AC20	8338	CCDS937.1	+	149886974	149887363	390	0	0	Glioblastoma
1	NC_000001.11	H2AC20	8338	CCDS937.1	+	149886974	149887363	390	2	0.00512821	Serous cystadenocarcinoma, NOS
1	NC_000001.11	H2AC20	8338	CCDS937.1	+	149886974	149887363	390	1	0.0025641	Papillary adenocarcinoma, NOS
1	NC_000001.11	H2AC20	8338	CCDS937.1	+	149886974	149887363	390	0	0	Clear cell adenocarcinoma, NOS
1	NC_000001.11	H2AC20	8338	CCDS937.1	+	149886974	149887363	390	2	0.00512821	Endometrioid adenocarcinoma, NOS
1	NC_000001.11	H2AC20	8338	CCDS937.1	+	149886974	149887363	390	1	0.0025641	Malignant melanoma, NOS
1	NC_000001.11	H2AC20	8338	CCDS937.1	+	149886974	149887363	390	2	0.00512821	Hepatocellular carcinoma, NOS
1	NC_000001.11	H2AC20	8338	CCDS937.1	+	149886974	149887363	390	6	0.0153846	Transitional cell carcinoma
1	NC_000001.11	H2AC20	8338	CCDS937.1	+	149886974	149887363	390	1	0.0025641	Lobular carcinoma, NOS
1	NC_000001.11	H2AC20	8338	CCDS937.1	+	149886974	149887363	390	0	0	Acute myeloid leukemia, NOS
1	NC_000001.11	H2AC20	8338	CCDS937.1	+	149886974	149887363	390	3	0.00769231	Mucinous adenocarcinoma
1	NC_000001.11	H2AC20	8338	CCDS937.1	+	149886974	149887363	390	0	0	Mixed glioma
1	NC_000001.11	H2AC20	8338	CCDS937.1	+	149886974	149887363	390	0	0	Astrocytoma, anaplastic
1	NC_000001.11	H2AC20	8338	CCDS937.1	+	149886974	149887363	390	1	0.0025641	Renal cell carcinoma, NOS
1	NC_000001.11	H2AC20	8338	CCDS937.1	+	149886974	149887363	390	1	0.0025641	Adenocarcinoma with mixed subtypes
1	NC_000001.11	H2AC20	8338	CCDS937.1	+	149886974	149887363	390	0	0	Renal cell carcinoma, chromophobe type
1	NC_000001.11	H2AC20	8338	CCDS937.1	+	149886974	149887363	390	1	0.0025641	Oligodendroglioma, NOS
1	NC_000001.11	H2AC20	8338	CCDS937.1	+	149886974	149887363	390	0	0	Squamous cell carcinoma, keratinizing, NOS
1	NC_000001.11	H2AC20	8338	CCDS937.1	+	149886974	149887363	390	0	0	Papillary carcinoma, follicular variant
1	NC_000001.11	H2AC20	8338	CCDS937.1	+	149886974	149887363	390	2	0.00512821	Serous adenocarcinoma, NOS
1	NC_000001.11	H2AC20	8338	CCDS937.1	+	149886974	149887363	390	1	0.0025641	Leiomyosarcoma, NOS
1	NC_000001.11	H2AC20	8338	CCDS937.1	+	149886974	149887363	390	3	0.00769231	Adenocarcinoma, intestinal type
1	NC_000001.11	H2AC20	8338	CCDS937.1	+	149886974	149887363	390	0	0	Adrenal cortical carcinoma
1	NC_000001.11	H2AC20	8338	CCDS937.1	+	149886974	149887363	390	0	0	Tubular adenocarcinoma
1	NC_000001.11	H2AC20	8338	CCDS937.1	+	149886974	149887363	390	0	0	Oligodendroglioma, anaplastic
1	NC_000001.11	H2AC20	8338	CCDS937.1	+	149886974	149887363	390	0	0	Carcinoma, diffuse type
1	NC_000001.11	H2AC20	8338	CCDS937.1	+	149886974	149887363	390	1	0.0025641	Papillary transitional cell carcinoma
1	NC_000001.11	H2AC20	8338	CCDS937.1	+	149886974	149887363	390	0	0	Seminoma, NOS
1	NC_000001.11	H2AC20	8338	CCDS937.1	+	149886974	149887363	390	1	0.0025641	Squamous cell carcinoma, large cell, nonkeratinizing, NOS
1	NC_000001.11	H2AC20	8338	CCDS937.1	+	149886974	149887363	390	0	0	Astrocytoma, NOS
1	NC_000001.11	H2AC20	8338	CCDS937.1	+	149886974	149887363	390	0	0	Dedifferentiated liposarcoma
1	NC_000001.11	H2AC20	8338	CCDS937.1	+	149886974	149887363	390	0	0	Epithelioid mesothelioma, malignant
1	NC_000001.11	H2AC20	8338	CCDS937.1	+	149886974	149887363	390	0	0	Cholangiocarcinoma
1	NC_000001.11	H2AC20	8338	CCDS937.1	+	149886974	149887363	390	1	0.0025641	Malignant lymphoma, large B-cell, diffuse, NOS
1	NC_000001.11	H2AC20	8338	CCDS937.1	+	149886974	149887363	390	3	0.00769231	Mullerian mixed tumor
1	NC_000001.11	H2AC20	8338	CCDS937.1	+	149886974	149887363	390	0	0	Mixed epithelioid and spindle cell melanoma
1	NC_000001.11	H2AC20	8338	CCDS937.1	+	149886974	149887363	390	0	0	Pheochromocytoma, malignant
1	NC_000001.11	H2AC20	8338	CCDS937.1	+	149886974	149887363	390	0	0	Papillary carcinoma, columnar cell
1	NC_000001.11	H2AC20	8338	CCDS937.1	+	149886974	149887363	390	0	0	Undifferentiated sarcoma
1	NC_000001.11	H2AC20	8338	CCDS937.1	+	149886974	149887363	390	0	0	Thymoma, type AB, malignant
1	NC_000001.11	H2AC20	8338	CCDS937.1	+	149886974	149887363	390	0	0	Infiltrating duct and lobular carcinoma
1	NC_000001.11	H2AC20	8338	CCDS937.1	+	149886974	149887363	390	0	0	Mixed germ cell tumor
1	NC_000001.11	H2AC20	8338	CCDS937.1	+	149886974	149887363	390	0	0	Basaloid squamous cell carcinoma
1	NC_000001.11	H2AC20	8338	CCDS937.1	+	149886974	149887363	390	0	0	Thymoma, type B2, malignant
1	NC_000001.11	H2AC20	8338	CCDS937.1	+	149886974	149887363	390	0	0	Embryonal carcinoma, NOS
1	NC_000001.11	H2AC20	8338	CCDS937.1	+	149886974	149887363	390	0	0	Fibromyxosarcoma
1	NC_000001.11	H2AC20	8338	CCDS937.1	+	149886974	149887363	390	0	0	Spindle cell melanoma, NOS
1	NC_000001.11	H2AC20	8338	CCDS937.1	+	149886974	149887363	390	0	0	Acinar cell carcinoma
1	NC_000001.11	H2AC20	8338	CCDS937.1	+	149886974	149887363	390	0	0	Mesothelioma, biphasic, malignant
1	NC_000001.11	H2AC20	8338	CCDS937.1	+	149886974	149887363	390	0	0	Adenocarcinoma, endocervical type
1	NC_000001.11	H2AC20	8338	CCDS937.1	+	149886974	149887363	390	0	0	Nodular melanoma
1	NC_000001.11	H2AC20	8338	CCDS937.1	+	149886974	149887363	390	0	0	Epithelioid cell melanoma
1	NC_000001.11	H2AC20	8338	CCDS937.1	+	149886974	149887363	390	0	0	Infiltrating duct mixed with other types of carcinoma
1	NC_000001.11	H2AC20	8338	CCDS937.1	+	149886974	149887363	390	1	0.0025641	Bronchiolo-alveolar carcinoma, non-mucinous
1	NC_000001.11	H2AC20	8338	CCDS937.1	+	149886974	149887363	390	0	0	Mucinous adenocarcinoma, endocervical type
1	NC_000001.11	H2AC20	8338	CCDS937.1	+	149886974	149887363	390	0	0	Metaplastic carcinoma, NOS
1	NC_000001.11	H2AC20	8338	CCDS937.1	+	149886974	149887363	390	0	0	Signet ring cell carcinoma
1	NC_000001.11	H2AC20	8338	CCDS937.1	+	149886974	149887363	390	0	0	Thymoma, type A, malignant
1	NC_000001.11	H2AC20	8338	CCDS937.1	+	149886974	149887363	390	0	0	Thymoma, type B3, malignant
1	NC_000001.11	H2AC20	8338	CCDS937.1	+	149886974	149887363	390	0	0	Thymoma, type B1, malignant
1	NC_000001.11	H2AC20	8338	CCDS937.1	+	149886974	149887363	390	0	0	Malignant fibrous histiocytoma
1	NC_000001.11	H2AC20	8338	CCDS937.1	+	149886974	149887363	390	0	0	Infiltrating lobular carcinoma, NOS
1	NC_000001.11	H2AC20	8338	CCDS937.1	+	149886974	149887363	390	0	0	Carcinosarcoma, NOS
1	NC_000001.11	H2AC20	8338	CCDS937.1	+	149886974	149887363	390	0	0	Thymic carcinoma, NOS
3	NC_000003.12	H1-10	8971	CCDS3057.1	-	129315260	129315901	642	25	0.0389408	Pancancer
3	NC_000003.12	H1-10	8971	CCDS3057.1	-	129315260	129315901	642	3	0.0046729	Adenocarcinoma, NOS
3	NC_000003.12	H1-10	8971	CCDS3057.1	-	129315260	129315901	642	8	0.0124611	Squamous cell carcinoma, NOS
3	NC_000003.12	H1-10	8971	CCDS3057.1	-	129315260	129315901	642	0	0	Infiltrating duct carcinoma, NOS
3	NC_000003.12	H1-10	8971	CCDS3057.1	-	129315260	129315901	642	3	0.0046729	Multiple myeloma
3	NC_000003.12	H1-10	8971	CCDS3057.1	-	129315260	129315901	642	1	0.00155763	Glioblastoma
3	NC_000003.12	H1-10	8971	CCDS3057.1	-	129315260	129315901	642	0	0	Serous cystadenocarcinoma, NOS
3	NC_000003.12	H1-10	8971	CCDS3057.1	-	129315260	129315901	642	1	0.00155763	Papillary adenocarcinoma, NOS
3	NC_000003.12	H1-10	8971	CCDS3057.1	-	129315260	129315901	642	1	0.00155763	Clear cell adenocarcinoma, NOS
3	NC_000003.12	H1-10	8971	CCDS3057.1	-	129315260	129315901	642	3	0.0046729	Endometrioid adenocarcinoma, NOS
3	NC_000003.12	H1-10	8971	CCDS3057.1	-	129315260	129315901	642	0	0	Malignant melanoma, NOS
3	NC_000003.12	H1-10	8971	CCDS3057.1	-	129315260	129315901	642	0	0	Hepatocellular carcinoma, NOS
3	NC_000003.12	H1-10	8971	CCDS3057.1	-	129315260	129315901	642	3	0.0046729	Transitional cell carcinoma
3	NC_000003.12	H1-10	8971	CCDS3057.1	-	129315260	129315901	642	0	0	Lobular carcinoma, NOS
3	NC_000003.12	H1-10	8971	CCDS3057.1	-	129315260	129315901	642	0	0	Acute myeloid leukemia, NOS
3	NC_000003.12	H1-10	8971	CCDS3057.1	-	129315260	129315901	642	0	0	Mucinous adenocarcinoma
3	NC_000003.12	H1-10	8971	CCDS3057.1	-	129315260	129315901	642	0	0	Mixed glioma
3	NC_000003.12	H1-10	8971	CCDS3057.1	-	129315260	129315901	642	0	0	Astrocytoma, anaplastic
3	NC_000003.12	H1-10	8971	CCDS3057.1	-	129315260	129315901	642	0	0	Renal cell carcinoma, NOS
3	NC_000003.12	H1-10	8971	CCDS3057.1	-	129315260	129315901	642	0	0	Adenocarcinoma with mixed subtypes
3	NC_000003.12	H1-10	8971	CCDS3057.1	-	129315260	129315901	642	0	0	Renal cell carcinoma, chromophobe type
3	NC_000003.12	H1-10	8971	CCDS3057.1	-	129315260	129315901	642	0	0	Oligodendroglioma, NOS
3	NC_000003.12	H1-10	8971	CCDS3057.1	-	129315260	129315901	642	0	0	Squamous cell carcinoma, keratinizing, NOS
3	NC_000003.12	H1-10	8971	CCDS3057.1	-	129315260	129315901	642	0	0	Papillary carcinoma, follicular variant
3	NC_000003.12	H1-10	8971	CCDS3057.1	-	129315260	129315901	642	1	0.00155763	Serous adenocarcinoma, NOS
3	NC_000003.12	H1-10	8971	CCDS3057.1	-	129315260	129315901	642	0	0	Leiomyosarcoma, NOS
3	NC_000003.12	H1-10	8971	CCDS3057.1	-	129315260	129315901	642	0	0	Adenocarcinoma, intestinal type
3	NC_000003.12	H1-10	8971	CCDS3057.1	-	129315260	129315901	642	0	0	Adrenal cortical carcinoma
3	NC_000003.12	H1-10	8971	CCDS3057.1	-	129315260	129315901	642	0	0	Tubular adenocarcinoma
3	NC_000003.12	H1-10	8971	CCDS3057.1	-	129315260	129315901	642	0	0	Oligodendroglioma, anaplastic
3	NC_000003.12	H1-10	8971	CCDS3057.1	-	129315260	129315901	642	0	0	Carcinoma, diffuse type
3	NC_000003.12	H1-10	8971	CCDS3057.1	-	129315260	129315901	642	0	0	Papillary transitional cell carcinoma
3	NC_000003.12	H1-10	8971	CCDS3057.1	-	129315260	129315901	642	0	0	Seminoma, NOS
3	NC_000003.12	H1-10	8971	CCDS3057.1	-	129315260	129315901	642	0	0	Squamous cell carcinoma, large cell, nonkeratinizing, NOS
3	NC_000003.12	H1-10	8971	CCDS3057.1	-	129315260	129315901	642	0	0	Astrocytoma, NOS
3	NC_000003.12	H1-10	8971	CCDS3057.1	-	129315260	129315901	642	0	0	Dedifferentiated liposarcoma
3	NC_000003.12	H1-10	8971	CCDS3057.1	-	129315260	129315901	642	0	0	Epithelioid mesothelioma, malignant
3	NC_000003.12	H1-10	8971	CCDS3057.1	-	129315260	129315901	642	0	0	Cholangiocarcinoma
3	NC_000003.12	H1-10	8971	CCDS3057.1	-	129315260	129315901	642	0	0	Malignant lymphoma, large B-cell, diffuse, NOS
3	NC_000003.12	H1-10	8971	CCDS3057.1	-	129315260	129315901	642	1	0.00155763	Mullerian mixed tumor
3	NC_000003.12	H1-10	8971	CCDS3057.1	-	129315260	129315901	642	0	0	Mixed epithelioid and spindle cell melanoma
3	NC_000003.12	H1-10	8971	CCDS3057.1	-	129315260	129315901	642	0	0	Pheochromocytoma, malignant
3	NC_000003.12	H1-10	8971	CCDS3057.1	-	129315260	129315901	642	0	0	Papillary carcinoma, columnar cell
3	NC_000003.12	H1-10	8971	CCDS3057.1	-	129315260	129315901	642	0	0	Undifferentiated sarcoma
3	NC_000003.12	H1-10	8971	CCDS3057.1	-	129315260	129315901	642	0	0	Thymoma, type AB, malignant
3	NC_000003.12	H1-10	8971	CCDS3057.1	-	129315260	129315901	642	0	0	Infiltrating duct and lobular carcinoma
3	NC_000003.12	H1-10	8971	CCDS3057.1	-	129315260	129315901	642	0	0	Mixed germ cell tumor
3	NC_000003.12	H1-10	8971	CCDS3057.1	-	129315260	129315901	642	0	0	Basaloid squamous cell carcinoma
3	NC_000003.12	H1-10	8971	CCDS3057.1	-	129315260	129315901	642	0	0	Thymoma, type B2, malignant
3	NC_000003.12	H1-10	8971	CCDS3057.1	-	129315260	129315901	642	0	0	Embryonal carcinoma, NOS
3	NC_000003.12	H1-10	8971	CCDS3057.1	-	129315260	129315901	642	0	0	Fibromyxosarcoma
3	NC_000003.12	H1-10	8971	CCDS3057.1	-	129315260	129315901	642	0	0	Spindle cell melanoma, NOS
3	NC_000003.12	H1-10	8971	CCDS3057.1	-	129315260	129315901	642	0	0	Acinar cell carcinoma
3	NC_000003.12	H1-10	8971	CCDS3057.1	-	129315260	129315901	642	0	0	Mesothelioma, biphasic, malignant
3	NC_000003.12	H1-10	8971	CCDS3057.1	-	129315260	129315901	642	0	0	Adenocarcinoma, endocervical type
3	NC_000003.12	H1-10	8971	CCDS3057.1	-	129315260	129315901	642	0	0	Nodular melanoma
3	NC_000003.12	H1-10	8971	CCDS3057.1	-	129315260	129315901	642	0	0	Epithelioid cell melanoma
3	NC_000003.12	H1-10	8971	CCDS3057.1	-	129315260	129315901	642	0	0	Infiltrating duct mixed with other types of carcinoma
3	NC_000003.12	H1-10	8971	CCDS3057.1	-	129315260	129315901	642	0	0	Bronchiolo-alveolar carcinoma, non-mucinous
3	NC_000003.12	H1-10	8971	CCDS3057.1	-	129315260	129315901	642	0	0	Mucinous adenocarcinoma, endocervical type
3	NC_000003.12	H1-10	8971	CCDS3057.1	-	129315260	129315901	642	0	0	Metaplastic carcinoma, NOS
3	NC_000003.12	H1-10	8971	CCDS3057.1	-	129315260	129315901	642	0	0	Signet ring cell carcinoma
3	NC_000003.12	H1-10	8971	CCDS3057.1	-	129315260	129315901	642	0	0	Thymoma, type A, malignant
3	NC_000003.12	H1-10	8971	CCDS3057.1	-	129315260	129315901	642	0	0	Thymoma, type B3, malignant
3	NC_000003.12	H1-10	8971	CCDS3057.1	-	129315260	129315901	642	0	0	Thymoma, type B1, malignant
3	NC_000003.12	H1-10	8971	CCDS3057.1	-	129315260	129315901	642	0	0	Malignant fibrous histiocytoma
3	NC_000003.12	H1-10	8971	CCDS3057.1	-	129315260	129315901	642	0	0	Infiltrating lobular carcinoma, NOS
3	NC_000003.12	H1-10	8971	CCDS3057.1	-	129315260	129315901	642	0	0	Carcinosarcoma, NOS
3	NC_000003.12	H1-10	8971	CCDS3057.1	-	129315260	129315901	642	0	0	Thymic carcinoma, NOS
6	NC_000006.12	H1-6	3010	CCDS34349.1	-	26107469	26108092	624	62	0.099359	Pancancer
6	NC_000006.12	H1-6	3010	CCDS34349.1	-	26107469	26108092	624	8	0.0128205	Adenocarcinoma, NOS
6	NC_000006.12	H1-6	3010	CCDS34349.1	-	26107469	26108092	624	14	0.0224359	Squamous cell carcinoma, NOS
6	NC_000006.12	H1-6	3010	CCDS34349.1	-	26107469	26108092	624	5	0.00801282	Infiltrating duct carcinoma, NOS
6	NC_000006.12	H1-6	3010	CCDS34349.1	-	26107469	26108092	624	0	0	Multiple myeloma
6	NC_000006.12	H1-6	3010	CCDS34349.1	-	26107469	26108092	624	2	0.00320513	Glioblastoma
6	NC_000006.12	H1-6	3010	CCDS34349.1	-	26107469	26108092	624	2	0.00320513	Serous cystadenocarcinoma, NOS
6	NC_000006.12	H1-6	3010	CCDS34349.1	-	26107469	26108092	624	1	0.00160256	Papillary adenocarcinoma, NOS
6	NC_000006.12	H1-6	3010	CCDS34349.1	-	26107469	26108092	624	0	0	Clear cell adenocarcinoma, NOS
6	NC_000006.12	H1-6	3010	CCDS34349.1	-	26107469	26108092	624	10	0.0160256	Endometrioid adenocarcinoma, NOS
6	NC_000006.12	H1-6	3010	CCDS34349.1	-	26107469	26108092	624	7	0.0112179	Malignant melanoma, NOS
6	NC_000006.12	H1-6	3010	CCDS34349.1	-	26107469	26108092	624	0	0	Hepatocellular carcinoma, NOS
6	NC_000006.12	H1-6	3010	CCDS34349.1	-	26107469	26108092	624	3	0.00480769	Transitional cell carcinoma
6	NC_000006.12	H1-6	3010	CCDS34349.1	-	26107469	26108092	624	0	0	Lobular carcinoma, NOS
6	NC_000006.12	H1-6	3010	CCDS34349.1	-	26107469	26108092	624	0	0	Acute myeloid leukemia, NOS
6	NC_000006.12	H1-6	3010	CCDS34349.1	-	26107469	26108092	624	1	0.00160256	Mucinous adenocarcinoma
6	NC_000006.12	H1-6	3010	CCDS34349.1	-	26107469	26108092	624	1	0.00160256	Mixed glioma
6	NC_000006.12	H1-6	3010	CCDS34349.1	-	26107469	26108092	624	0	0	Astrocytoma, anaplastic
6	NC_000006.12	H1-6	3010	CCDS34349.1	-	26107469	26108092	624	0	0	Renal cell carcinoma, NOS
6	NC_000006.12	H1-6	3010	CCDS34349.1	-	26107469	26108092	624	1	0.00160256	Adenocarcinoma with mixed subtypes
6	NC_000006.12	H1-6	3010	CCDS34349.1	-	26107469	26108092	624	1	0.00160256	Renal cell carcinoma, chromophobe type
6	NC_000006.12	H1-6	3010	CCDS34349.1	-	26107469	26108092	624	0	0	Oligodendroglioma, NOS
6	NC_000006.12	H1-6	3010	CCDS34349.1	-	26107469	26108092	624	0	0	Squamous cell carcinoma, keratinizing, NOS
6	NC_000006.12	H1-6	3010	CCDS34349.1	-	26107469	26108092	624	0	0	Papillary carcinoma, follicular variant
6	NC_000006.12	H1-6	3010	CCDS34349.1	-	26107469	26108092	624	1	0.00160256	Serous adenocarcinoma, NOS
6	NC_000006.12	H1-6	3010	CCDS34349.1	-	26107469	26108092	624	0	0	Leiomyosarcoma, NOS
6	NC_000006.12	H1-6	3010	CCDS34349.1	-	26107469	26108092	624	0	0	Adenocarcinoma, intestinal type
6	NC_000006.12	H1-6	3010	CCDS34349.1	-	26107469	26108092	624	0	0	Adrenal cortical carcinoma
6	NC_000006.12	H1-6	3010	CCDS34349.1	-	26107469	26108092	624	1	0.00160256	Tubular adenocarcinoma
6	NC_000006.12	H1-6	3010	CCDS34349.1	-	26107469	26108092	624	0	0	Oligodendroglioma, anaplastic
6	NC_000006.12	H1-6	3010	CCDS34349.1	-	26107469	26108092	624	0	0	Carcinoma, diffuse type
6	NC_000006.12	H1-6	3010	CCDS34349.1	-	26107469	26108092	624	0	0	Papillary transitional cell carcinoma
6	NC_000006.12	H1-6	3010	CCDS34349.1	-	26107469	26108092	624	0	0	Seminoma, NOS
6	NC_000006.12	H1-6	3010	CCDS34349.1	-	26107469	26108092	624	0	0	Squamous cell carcinoma, large cell, nonkeratinizing, NOS
6	NC_000006.12	H1-6	3010	CCDS34349.1	-	26107469	26108092	624	0	0	Astrocytoma, NOS
6	NC_000006.12	H1-6	3010	CCDS34349.1	-	26107469	26108092	624	0	0	Dedifferentiated liposarcoma
6	NC_000006.12	H1-6	3010	CCDS34349.1	-	26107469	26108092	624	0	0	Epithelioid mesothelioma, malignant
6	NC_000006.12	H1-6	3010	CCDS34349.1	-	26107469	26108092	624	1	0.00160256	Cholangiocarcinoma
6	NC_000006.12	H1-6	3010	CCDS34349.1	-	26107469	26108092	624	0	0	Malignant lymphoma, large B-cell, diffuse, NOS
6	NC_000006.12	H1-6	3010	CCDS34349.1	-	26107469	26108092	624	0	0	Mullerian mixed tumor
6	NC_000006.12	H1-6	3010	CCDS34349.1	-	26107469	26108092	624	0	0	Mixed epithelioid and spindle cell melanoma
6	NC_000006.12	H1-6	3010	CCDS34349.1	-	26107469	26108092	624	0	0	Pheochromocytoma, malignant
6	NC_000006.12	H1-6	3010	CCDS34349.1	-	26107469	26108092	624	0	0	Papillary carcinoma, columnar cell
6	NC_000006.12	H1-6	3010	CCDS34349.1	-	26107469	26108092	624	0	0	Undifferentiated sarcoma
6	NC_000006.12	H1-6	3010	CCDS34349.1	-	26107469	26108092	624	0	0	Thymoma, type AB, malignant
6	NC_000006.12	H1-6	3010	CCDS34349.1	-	26107469	26108092	624	0	0	Infiltrating duct and lobular carcinoma
6	NC_000006.12	H1-6	3010	CCDS34349.1	-	26107469	26108092	624	0	0	Mixed germ cell tumor
6	NC_000006.12	H1-6	3010	CCDS34349.1	-	26107469	26108092	624	0	0	Basaloid squamous cell carcinoma
6	NC_000006.12	H1-6	3010	CCDS34349.1	-	26107469	26108092	624	0	0	Thymoma, type B2, malignant
6	NC_000006.12	H1-6	3010	CCDS34349.1	-	26107469	26108092	624	0	0	Embryonal carcinoma, NOS
6	NC_000006.12	H1-6	3010	CCDS34349.1	-	26107469	26108092	624	0	0	Fibromyxosarcoma
6	NC_000006.12	H1-6	3010	CCDS34349.1	-	26107469	26108092	624	0	0	Spindle cell melanoma, NOS
6	NC_000006.12	H1-6	3010	CCDS34349.1	-	26107469	26108092	624	0	0	Acinar cell carcinoma
6	NC_000006.12	H1-6	3010	CCDS34349.1	-	26107469	26108092	624	0	0	Mesothelioma, biphasic, malignant
6	NC_000006.12	H1-6	3010	CCDS34349.1	-	26107469	26108092	624	0	0	Adenocarcinoma, endocervical type
6	NC_000006.12	H1-6	3010	CCDS34349.1	-	26107469	26108092	624	0	0	Nodular melanoma
6	NC_000006.12	H1-6	3010	CCDS34349.1	-	26107469	26108092	624	0	0	Epithelioid cell melanoma
6	NC_000006.12	H1-6	3010	CCDS34349.1	-	26107469	26108092	624	0	0	Infiltrating duct mixed with other types of carcinoma
6	NC_000006.12	H1-6	3010	CCDS34349.1	-	26107469	26108092	624	2	0.00320513	Bronchiolo-alveolar carcinoma, non-mucinous
6	NC_000006.12	H1-6	3010	CCDS34349.1	-	26107469	26108092	624	0	0	Mucinous adenocarcinoma, endocervical type
6	NC_000006.12	H1-6	3010	CCDS34349.1	-	26107469	26108092	624	0	0	Metaplastic carcinoma, NOS
6	NC_000006.12	H1-6	3010	CCDS34349.1	-	26107469	26108092	624	0	0	Signet ring cell carcinoma
6	NC_000006.12	H1-6	3010	CCDS34349.1	-	26107469	26108092	624	0	0	Thymoma, type A, malignant
6	NC_000006.12	H1-6	3010	CCDS34349.1	-	26107469	26108092	624	0	0	Thymoma, type B3, malignant
6	NC_000006.12	H1-6	3010	CCDS34349.1	-	26107469	26108092	624	0	0	Thymoma, type B1, malignant
6	NC_000006.12	H1-6	3010	CCDS34349.1	-	26107469	26108092	624	0	0	Malignant fibrous histiocytoma
[truncated: 4,626 more rows]

## Sheet: Table S3
Supplementary Table S3. Mutation rates for histone proteins, by cancer type
histone_protein_name	uniprot_accession	protein_length	cumulative_cds_length	cumulative_mutations	mutation_rate	cancer_type
H2A clustered histone 21	Q8IUE6	130	393	0	0	Lobular carcinoma, NOS
Histone H2B type F-S	P57053	126	467	0	0	Lobular carcinoma, NOS
H2A clustered histone 18	Q6FI13	130	786	0	0	Lobular carcinoma, NOS
H2A.Z variant histone 1	P0C0S5	128	387	1	0.00258398	Lobular carcinoma, NOS
H2A.X variant histone	P16104	143	432	0	0	Lobular carcinoma, NOS
H2B clustered histone 10	P62807	126	1905	4	0.00209974	Lobular carcinoma, NOS
Histone H2A-like 3	A0A3B3IU63	148	447	0	0	Lobular carcinoma, NOS
Histone H2B type 3-B	Q8N257	126	381	2	0.00524934	Lobular carcinoma, NOS
H2A clustered histone 6	Q93077	130	393	1	0.00254453	Lobular carcinoma, NOS
H1.8 linker histone	Q8IZA3	346	1366	0	0	Lobular carcinoma, NOS
H2B clustered histone 14	Q99879	126	381	0	0	Lobular carcinoma, NOS
H3.Y histone 2	P0DPK5	147	444	0	0	Lobular carcinoma, NOS
Histone H2A type 3	Q7L7L0	130	393	0	0	Lobular carcinoma, NOS
H2A clustered histone 7	P20671	130	393	0	0	Lobular carcinoma, NOS
Histone H3-7	Q5TEC6	136	411	0	0	Lobular carcinoma, NOS
H1.7 linker histone	Q75WM6	255	768	0	0	Lobular carcinoma, NOS
H1.5 linker histone, cluster member	P16401	226	681	0	0	Lobular carcinoma, NOS
H1.4 linker histone, cluster member	P10412	219	660	0	0	Lobular carcinoma, NOS
H2A clustered histone 11	P0C0S8	130	1965	3	0.00152672	Lobular carcinoma, NOS
H3.3 histone A	P84243	136	822	1	0.00121655	Lobular carcinoma, NOS
H2B clustered histone 1	Q96A08	127	384	0	0	Lobular carcinoma, NOS
H3.5 histone	Q6NXT2	135	408	0	0	Lobular carcinoma, NOS
H3 clustered histone 1	P68431	136	4110	6	0.00145985	Lobular carcinoma, NOS
H1.2 linker histone, cluster member	P16403	213	642	2	0.00311526	Lobular carcinoma, NOS
H3 clustered histone 13	Q71DI3	136	1233	2	0.00162206	Lobular carcinoma, NOS
H1.3 linker histone, cluster member	P16402	221	666	0	0	Lobular carcinoma, NOS
H2B clustered histone 12	O60814	126	381	0	0	Lobular carcinoma, NOS
H1.1 linker histone, cluster member	Q02539	215	648	0	0	Lobular carcinoma, NOS
H2A clustered histone 12	Q96KK5	128	387	0	0	Lobular carcinoma, NOS
H2A clustered histone 20	Q16777	129	390	1	0.0025641	Lobular carcinoma, NOS
H2B clustered histone 18	Q5QNW6	126	786	0	0	Lobular carcinoma, NOS
H2A clustered histone 1	Q96QV6	131	396	1	0.00252525	Lobular carcinoma, NOS
H1.6 linker histone, cluster member	P22492	207	624	0	0	Lobular carcinoma, NOS
H2B.W histone 2	P0C1H6	154	447	0	0	Lobular carcinoma, NOS
centromere protein A	P49450	140	423	0	0	Lobular carcinoma, NOS
H1.10 linker histone	Q92522	213	642	0	0	Lobular carcinoma, NOS
Histone H2B type 2-K1	A0A2R8Y619	122	369	0	0	Lobular carcinoma, NOS
H2B clustered histone 11	P06899	126	381	0	0	Lobular carcinoma, NOS
H2A.Z variant histone 2	Q71UI9	128	413	0	0	Lobular carcinoma, NOS
H1.0 linker histone	P07305	194	585	0	0	Lobular carcinoma, NOS
H2B clustered histone 15	Q99877	126	381	1	0.00262467	Lobular carcinoma, NOS
H2A clustered histone 14	Q99878	128	387	1	0.00258398	Lobular carcinoma, NOS
H2A.J histone	Q9BTM1	129	390	0	0	Lobular carcinoma, NOS
H2B clustered histone 5	P58876	126	381	0	0	Lobular carcinoma, NOS
H4 clustered histone 7	Q99525	98	297	0	0	Lobular carcinoma, NOS
H2B clustered histone 13	Q99880	126	381	0	0	Lobular carcinoma, NOS
H2B clustered histone 3	P33778	126	381	0	0	Lobular carcinoma, NOS
H3.Y histone 1	P0DPK2	136	411	0	0	Lobular carcinoma, NOS
H2A.P histone	O75409	117	354	0	0	Lobular carcinoma, NOS
H2A.B variant histone 1	P0C5Y9	115	348	0	0	Lobular carcinoma, NOS
H4 clustered histone 1	P62805	103	4368	6	0.00137363	Lobular carcinoma, NOS
macroH2A.1 histone	O75367	369	1318	1	0.000758725	Lobular carcinoma, NOS
H2A.B variant histone 2	P0C5Z0	115	696	0	0	Lobular carcinoma, NOS
H3.4 histone	Q16695	136	411	1	0.00243309	Lobular carcinoma, NOS
H2B clustered histone 9	Q93079	126	381	0	0	Lobular carcinoma, NOS
H2A clustered histone 4	P04908	130	786	0	0	Lobular carcinoma, NOS
macroH2A.2 histone	Q9P0M6	372	1119	1	0.000893655	Lobular carcinoma, NOS
H2B clustered histone 17	P23527	126	381	0	0	Lobular carcinoma, NOS
H2B clustered histone 21	Q16778	126	381	2	0.00524934	Lobular carcinoma, NOS
H2B.W histone 1	Q7Z2G1	175	444	0	0	Lobular carcinoma, NOS
H2A clustered histone 21	Q8IUE6	130	393	0	0	Oligodendroglioma, NOS
Histone H2B type F-S	P57053	126	467	0	0	Oligodendroglioma, NOS
H2A clustered histone 18	Q6FI13	130	786	0	0	Oligodendroglioma, NOS
H2A.Z variant histone 1	P0C0S5	128	387	0	0	Oligodendroglioma, NOS
H2A.X variant histone	P16104	143	432	0	0	Oligodendroglioma, NOS
H2B clustered histone 10	P62807	126	1905	0	0	Oligodendroglioma, NOS
Histone H2A-like 3	A0A3B3IU63	148	447	0	0	Oligodendroglioma, NOS
Histone H2B type 3-B	Q8N257	126	381	0	0	Oligodendroglioma, NOS
H2A clustered histone 6	Q93077	130	393	1	0.00254453	Oligodendroglioma, NOS
H1.8 linker histone	Q8IZA3	346	1366	0	0	Oligodendroglioma, NOS
H2B clustered histone 14	Q99879	126	381	1	0.00262467	Oligodendroglioma, NOS
H3.Y histone 2	P0DPK5	147	444	0	0	Oligodendroglioma, NOS
Histone H2A type 3	Q7L7L0	130	393	0	0	Oligodendroglioma, NOS
H2A clustered histone 7	P20671	130	393	0	0	Oligodendroglioma, NOS
Histone H3-7	Q5TEC6	136	411	0	0	Oligodendroglioma, NOS
H1.7 linker histone	Q75WM6	255	768	0	0	Oligodendroglioma, NOS
H1.5 linker histone, cluster member	P16401	226	681	0	0	Oligodendroglioma, NOS
H1.4 linker histone, cluster member	P10412	219	660	0	0	Oligodendroglioma, NOS
H2A clustered histone 11	P0C0S8	130	1965	1	0.000508906	Oligodendroglioma, NOS
H3.3 histone A	P84243	136	822	0	0	Oligodendroglioma, NOS
H2B clustered histone 1	Q96A08	127	384	0	0	Oligodendroglioma, NOS
H3.5 histone	Q6NXT2	135	408	0	0	Oligodendroglioma, NOS
H3 clustered histone 1	P68431	136	4110	1	0.000243309	Oligodendroglioma, NOS
H1.2 linker histone, cluster member	P16403	213	642	0	0	Oligodendroglioma, NOS
H3 clustered histone 13	Q71DI3	136	1233	0	0	Oligodendroglioma, NOS
H1.3 linker histone, cluster member	P16402	221	666	0	0	Oligodendroglioma, NOS
H2B clustered histone 12	O60814	126	381	0	0	Oligodendroglioma, NOS
H1.1 linker histone, cluster member	Q02539	215	648	0	0	Oligodendroglioma, NOS
H2A clustered histone 12	Q96KK5	128	387	0	0	Oligodendroglioma, NOS
H2A clustered histone 20	Q16777	129	390	1	0.0025641	Oligodendroglioma, NOS
H2B clustered histone 18	Q5QNW6	126	786	0	0	Oligodendroglioma, NOS
H2A clustered histone 1	Q96QV6	131	396	0	0	Oligodendroglioma, NOS
H1.6 linker histone, cluster member	P22492	207	624	0	0	Oligodendroglioma, NOS
H2B.W histone 2	P0C1H6	154	447	0	0	Oligodendroglioma, NOS
centromere protein A	P49450	140	423	0	0	Oligodendroglioma, NOS
H1.10 linker histone	Q92522	213	642	0	0	Oligodendroglioma, NOS
Histone H2B type 2-K1	A0A2R8Y619	122	369	0	0	Oligodendroglioma, NOS
H2B clustered histone 11	P06899	126	381	0	0	Oligodendroglioma, NOS
H2A.Z variant histone 2	Q71UI9	128	413	0	0	Oligodendroglioma, NOS
H1.0 linker histone	P07305	194	585	0	0	Oligodendroglioma, NOS
H2B clustered histone 15	Q99877	126	381	0	0	Oligodendroglioma, NOS
H2A clustered histone 14	Q99878	128	387	0	0	Oligodendroglioma, NOS
H2A.J histone	Q9BTM1	129	390	0	0	Oligodendroglioma, NOS
H2B clustered histone 5	P58876	126	381	0	0	Oligodendroglioma, NOS
H4 clustered histone 7	Q99525	98	297	0	0	Oligodendroglioma, NOS
H2B clustered histone 13	Q99880	126	381	0	0	Oligodendroglioma, NOS
H2B clustered histone 3	P33778	126	381	0	0	Oligodendroglioma, NOS
H3.Y histone 1	P0DPK2	136	411	0	0	Oligodendroglioma, NOS
H2A.P histone	O75409	117	354	0	0	Oligodendroglioma, NOS
H2A.B variant histone 1	P0C5Y9	115	348	0	0	Oligodendroglioma, NOS
H4 clustered histone 1	P62805	103	4368	1	0.000228938	Oligodendroglioma, NOS
macroH2A.1 histone	O75367	369	1318	0	0	Oligodendroglioma, NOS
H2A.B variant histone 2	P0C5Z0	115	696	0	0	Oligodendroglioma, NOS
H3.4 histone	Q16695	136	411	0	0	Oligodendroglioma, NOS
H2B clustered histone 9	Q93079	126	381	0	0	Oligodendroglioma, NOS
H2A clustered histone 4	P04908	130	786	0	0	Oligodendroglioma, NOS
macroH2A.2 histone	Q9P0M6	372	1119	1	0.000893655	Oligodendroglioma, NOS
H2B clustered histone 17	P23527	126	381	0	0	Oligodendroglioma, NOS
H2B clustered histone 21	Q16778	126	381	0	0	Oligodendroglioma, NOS
H2B.W histone 1	Q7Z2G1	175	444	0	0	Oligodendroglioma, NOS
H2A clustered histone 21	Q8IUE6	130	393	0	0	Squamous cell carcinoma, large cell, nonkeratinizing, NOS
Histone H2B type F-S	P57053	126	467	0	0	Squamous cell carcinoma, large cell, nonkeratinizing, NOS
H2A clustered histone 18	Q6FI13	130	786	0	0	Squamous cell carcinoma, large cell, nonkeratinizing, NOS
H2A.Z variant histone 1	P0C0S5	128	387	0	0	Squamous cell carcinoma, large cell, nonkeratinizing, NOS
H2A.X variant histone	P16104	143	432	0	0	Squamous cell carcinoma, large cell, nonkeratinizing, NOS
H2B clustered histone 10	P62807	126	1905	0	0	Squamous cell carcinoma, large cell, nonkeratinizing, NOS
Histone H2A-like 3	A0A3B3IU63	148	447	0	0	Squamous cell carcinoma, large cell, nonkeratinizing, NOS
Histone H2B type 3-B	Q8N257	126	381	0	0	Squamous cell carcinoma, large cell, nonkeratinizing, NOS
H2A clustered histone 6	Q93077	130	393	0	0	Squamous cell carcinoma, large cell, nonkeratinizing, NOS
H1.8 linker histone	Q8IZA3	346	1366	0	0	Squamous cell carcinoma, large cell, nonkeratinizing, NOS
H2B clustered histone 14	Q99879	126	381	0	0	Squamous cell carcinoma, large cell, nonkeratinizing, NOS
H3.Y histone 2	P0DPK5	147	444	0	0	Squamous cell carcinoma, large cell, nonkeratinizing, NOS
Histone H2A type 3	Q7L7L0	130	393	1	0.00254453	Squamous cell carcinoma, large cell, nonkeratinizing, NOS
H2A clustered histone 7	P20671	130	393	0	0	Squamous cell carcinoma, large cell, nonkeratinizing, NOS
Histone H3-7	Q5TEC6	136	411	0	0	Squamous cell carcinoma, large cell, nonkeratinizing, NOS
H1.7 linker histone	Q75WM6	255	768	0	0	Squamous cell carcinoma, large cell, nonkeratinizing, NOS
H1.5 linker histone, cluster member	P16401	226	681	2	0.00293686	Squamous cell carcinoma, large cell, nonkeratinizing, NOS
H1.4 linker histone, cluster member	P10412	219	660	0	0	Squamous cell carcinoma, large cell, nonkeratinizing, NOS
H2A clustered histone 11	P0C0S8	130	1965	3	0.00152672	Squamous cell carcinoma, large cell, nonkeratinizing, NOS
H3.3 histone A	P84243	136	822	1	0.00121655	Squamous cell carcinoma, large cell, nonkeratinizing, NOS
H2B clustered histone 1	Q96A08	127	384	0	0	Squamous cell carcinoma, large cell, nonkeratinizing, NOS
H3.5 histone	Q6NXT2	135	408	0	0	Squamous cell carcinoma, large cell, nonkeratinizing, NOS
H3 clustered histone 1	P68431	136	4110	5	0.00121655	Squamous cell carcinoma, large cell, nonkeratinizing, NOS
H1.2 linker histone, cluster member	P16403	213	642	0	0	Squamous cell carcinoma, large cell, nonkeratinizing, NOS
H3 clustered histone 13	Q71DI3	136	1233	0	0	Squamous cell carcinoma, large cell, nonkeratinizing, NOS
H1.3 linker histone, cluster member	P16402	221	666	1	0.0015015	Squamous cell carcinoma, large cell, nonkeratinizing, NOS
H2B clustered histone 12	O60814	126	381	0	0	Squamous cell carcinoma, large cell, nonkeratinizing, NOS
H1.1 linker histone, cluster member	Q02539	215	648	0	0	Squamous cell carcinoma, large cell, nonkeratinizing, NOS
H2A clustered histone 12	Q96KK5	128	387	1	0.00258398	Squamous cell carcinoma, large cell, nonkeratinizing, NOS
H2A clustered histone 20	Q16777	129	390	1	0.0025641	Squamous cell carcinoma, large cell, nonkeratinizing, NOS
H2B clustered histone 18	Q5QNW6	126	786	0	0	Squamous cell carcinoma, large cell, nonkeratinizing, NOS
H2A clustered histone 1	Q96QV6	131	396	0	0	Squamous cell carcinoma, large cell, nonkeratinizing, NOS
H1.6 linker histone, cluster member	P22492	207	624	0	0	Squamous cell carcinoma, large cell, nonkeratinizing, NOS
H2B.W histone 2	P0C1H6	154	447	0	0	Squamous cell carcinoma, large cell, nonkeratinizing, NOS
centromere protein A	P49450	140	423	0	0	Squamous cell carcinoma, large cell, nonkeratinizing, NOS
H1.10 linker histone	Q92522	213	642	0	0	Squamous cell carcinoma, large cell, nonkeratinizing, NOS
Histone H2B type 2-K1	A0A2R8Y619	122	369	0	0	Squamous cell carcinoma, large cell, nonkeratinizing, NOS
H2B clustered histone 11	P06899	126	381	0	0	Squamous cell carcinoma, large cell, nonkeratinizing, NOS
H2A.Z variant histone 2	Q71UI9	128	413	0	0	Squamous cell carcinoma, large cell, nonkeratinizing, NOS
H1.0 linker histone	P07305	194	585	0	0	Squamous cell carcinoma, large cell, nonkeratinizing, NOS
H2B clustered histone 15	Q99877	126	381	0	0	Squamous cell carcinoma, large cell, nonkeratinizing, NOS
H2A clustered histone 14	Q99878	128	387	2	0.00516796	Squamous cell carcinoma, large cell, nonkeratinizing, NOS
H2A.J histone	Q9BTM1	129	390	0	0	Squamous cell carcinoma, large cell, nonkeratinizing, NOS
H2B clustered histone 5	P58876	126	381	1	0.00262467	Squamous cell carcinoma, large cell, nonkeratinizing, NOS
H4 clustered histone 7	Q99525	98	297	0	0	Squamous cell carcinoma, large cell, nonkeratinizing, NOS
H2B clustered histone 13	Q99880	126	381	0	0	Squamous cell carcinoma, large cell, nonkeratinizing, NOS
H2B clustered histone 3	P33778	126	381	0	0	Squamous cell carcinoma, large cell, nonkeratinizing, NOS
H3.Y histone 1	P0DPK2	136	411	0	0	Squamous cell carcinoma, large cell, nonkeratinizing, NOS
H2A.P histone	O75409	117	354	1	0.00282486	Squamous cell carcinoma, large cell, nonkeratinizing, NOS
H2A.B variant histone 1	P0C5Y9	115	348	0	0	Squamous cell carcinoma, large cell, nonkeratinizing, NOS
H4 clustered histone 1	P62805	103	4368	3	0.000686813	Squamous cell carcinoma, large cell, nonkeratinizing, NOS
macroH2A.1 histone	O75367	369	1318	0	0	Squamous cell carcinoma, large cell, nonkeratinizing, NOS
H2A.B variant histone 2	P0C5Z0	115	696	0	0	Squamous cell carcinoma, large cell, nonkeratinizing, NOS
H3.4 histone	Q16695	136	411	0	0	Squamous cell carcinoma, large cell, nonkeratinizing, NOS
H2B clustered histone 9	Q93079	126	381	0	0	Squamous cell carcinoma, large cell, nonkeratinizing, NOS
H2A clustered histone 4	P04908	130	786	3	0.00381679	Squamous cell carcinoma, large cell, nonkeratinizing, NOS
macroH2A.2 histone	Q9P0M6	372	1119	0	0	Squamous cell carcinoma, large cell, nonkeratinizing, NOS
H2B clustered histone 17	P23527	126	381	0	0	Squamous cell carcinoma, large cell, nonkeratinizing, NOS
H2B clustered histone 21	Q16778	126	381	0	0	Squamous cell carcinoma, large cell, nonkeratinizing, NOS
H2B.W histone 1	Q7Z2G1	175	444	0	0	Squamous cell carcinoma, large cell, nonkeratinizing, NOS
H2A clustered histone 21	Q8IUE6	130	393	0	0	Mucinous adenocarcinoma, endocervical type
Histone H2B type F-S	P57053	126	467	0	0	Mucinous adenocarcinoma, endocervical type
H2A clustered histone 18	Q6FI13	130	786	0	0	Mucinous adenocarcinoma, endocervical type
H2A.Z variant histone 1	P0C0S5	128	387	0	0	Mucinous adenocarcinoma, endocervical type
H2A.X variant histone	P16104	143	432	0	0	Mucinous adenocarcinoma, endocervical type
H2B clustered histone 10	P62807	126	1905	0	0	Mucinous adenocarcinoma, endocervical type
Histone H2A-like 3	A0A3B3IU63	148	447	0	0	Mucinous adenocarcinoma, endocervical type
Histone H2B type 3-B	Q8N257	126	381	0	0	Mucinous adenocarcinoma, endocervical type
H2A clustered histone 6	Q93077	130	393	0	0	Mucinous adenocarcinoma, endocervical type
H1.8 linker histone	Q8IZA3	346	1366	0	0	Mucinous adenocarcinoma, endocervical type
H2B clustered histone 14	Q99879	126	381	0	0	Mucinous adenocarcinoma, endocervical type
H3.Y histone 2	P0DPK5	147	444	0	0	Mucinous adenocarcinoma, endocervical type
Histone H2A type 3	Q7L7L0	130	393	0	0	Mucinous adenocarcinoma, endocervical type
H2A clustered histone 7	P20671	130	393	0	0	Mucinous adenocarcinoma, endocervical type
Histone H3-7	Q5TEC6	136	411	0	0	Mucinous adenocarcinoma, endocervical type
H1.7 linker histone	Q75WM6	255	768	1	0.00130208	Mucinous adenocarcinoma, endocervical type
H1.5 linker histone, cluster member	P16401	226	681	0	0	Mucinous adenocarcinoma, endocervical type
H1.4 linker histone, cluster member	P10412	219	660	0	0	Mucinous adenocarcinoma, endocervical type
H2A clustered histone 11	P0C0S8	130	1965	0	0	Mucinous adenocarcinoma, endocervical type
H3.3 histone A	P84243	136	822	0	0	Mucinous adenocarcinoma, endocervical type
H2B clustered histone 1	Q96A08	127	384	0	0	Mucinous adenocarcinoma, endocervical type
H3.5 histone	Q6NXT2	135	408	0	0	Mucinous adenocarcinoma, endocervical type
H3 clustered histone 1	P68431	136	4110	1	0.000243309	Mucinous adenocarcinoma, endocervical type
H1.2 linker histone, cluster member	P16403	213	642	0	0	Mucinous adenocarcinoma, endocervical type
H3 clustered histone 13	Q71DI3	136	1233	0	0	Mucinous adenocarcinoma, endocervical type
H1.3 linker histone, cluster member	P16402	221	666	0	0	Mucinous adenocarcinoma, endocervical type
H2B clustered histone 12	O60814	126	381	0	0	Mucinous adenocarcinoma, endocervical type
H1.1 linker histone, cluster member	Q02539	215	648	0	0	Mucinous adenocarcinoma, endocervical type
H2A clustered histone 12	Q96KK5	128	387	1	0.00258398	Mucinous adenocarcinoma, endocervical type
H2A clustered histone 20	Q16777	129	390	0	0	Mucinous adenocarcinoma, endocervical type
H2B clustered histone 18	Q5QNW6	126	786	0	0	Mucinous adenocarcinoma, endocervical type
H2A clustered histone 1	Q96QV6	131	396	0	0	Mucinous adenocarcinoma, endocervical type
H1.6 linker histone, cluster member	P22492	207	624	0	0	Mucinous adenocarcinoma, endocervical type
H2B.W histone 2	P0C1H6	154	447	0	0	Mucinous adenocarcinoma, endocervical type
centromere protein A	P49450	140	423	0	0	Mucinous adenocarcinoma, endocervical type
H1.10 linker histone	Q92522	213	642	0	0	Mucinous adenocarcinoma, endocervical type
Histone H2B type 2-K1	A0A2R8Y619	122	369	0	0	Mucinous adenocarcinoma, endocervical type
H2B clustered histone 11	P06899	126	381	0	0	Mucinous adenocarcinoma, endocervical type
H2A.Z variant histone 2	Q71UI9	128	413	0	0	Mucinous adenocarcinoma, endocervical type
H1.0 linker histone	P07305	194	585	0	0	Mucinous adenocarcinoma, endocervical type
H2B clustered histone 15	Q99877	126	381	0	0	Mucinous adenocarcinoma, endocervical type
H2A clustered histone 14	Q99878	128	387	0	0	Mucinous adenocarcinoma, endocervical type
H2A.J histone	Q9BTM1	129	390	0	0	Mucinous adenocarcinoma, endocervical type
H2B clustered histone 5	P58876	126	381	0	0	Mucinous adenocarcinoma, endocervical type
H4 clustered histone 7	Q99525	98	297	0	0	Mucinous adenocarcinoma, endocervical type
H2B clustered histone 13	Q99880	126	381	0	0	Mucinous adenocarcinoma, endocervical type
H2B clustered histone 3	P33778	126	381	0	0	Mucinous adenocarcinoma, endocervical type
H3.Y histone 1	P0DPK2	136	411	0	0	Mucinous adenocarcinoma, endocervical type
H2A.P histone	O75409	117	354	0	0	Mucinous adenocarcinoma, endocervical type
H2A.B variant histone 1	P0C5Y9	115	348	0	0	Mucinous adenocarcinoma, endocervical type
H4 clustered histone 1	P62805	103	4368	2	0.000457875	Mucinous adenocarcinoma, endocervical type
macroH2A.1 histone	O75367	369	1318	0	0	Mucinous adenocarcinoma, endocervical type
H2A.B variant histone 2	P0C5Z0	115	696	0	0	Mucinous adenocarcinoma, endocervical type
H3.4 histone	Q16695	136	411	0	0	Mucinous adenocarcinoma, endocervical type
H2B clustered histone 9	Q93079	126	381	0	0	Mucinous adenocarcinoma, endocervical type
H2A clustered histone 4	P04908	130	786	0	0	Mucinous adenocarcinoma, endocervical type
macroH2A.2 histone	Q9P0M6	372	1119	0	0	Mucinous adenocarcinoma, endocervical type
H2B clustered histone 17	P23527	126	381	0	0	Mucinous adenocarcinoma, endocervical type
H2B clustered histone 21	Q16778	126	381	0	0	Mucinous adenocarcinoma, endocervical type
H2B.W histone 1	Q7Z2G1	175	444	0	0	Mucinous adenocarcinoma, endocervical type
H2A clustered histone 21	Q8IUE6	130	393	0	0	Papillary adenocarcinoma, NOS
Histone H2B type F-S	P57053	126	467	0	0	Papillary adenocarcinoma, NOS
H2A clustered histone 18	Q6FI13	130	786	0	0	Papillary adenocarcinoma, NOS
H2A.Z variant histone 1	P0C0S5	128	387	0	0	Papillary adenocarcinoma, NOS
H2A.X variant histone	P16104	143	432	0	0	Papillary adenocarcinoma, NOS
H2B clustered histone 10	P62807	126	1905	5	0.00262467	Papillary adenocarcinoma, NOS
Histone H2A-like 3	A0A3B3IU63	148	447	0	0	Papillary adenocarcinoma, NOS
Histone H2B type 3-B	Q8N257	126	381	0	0	Papillary adenocarcinoma, NOS
H2A clustered histone 6	Q93077	130	393	1	0.00254453	Papillary adenocarcinoma, NOS
H1.8 linker histone	Q8IZA3	346	1366	0	0	Papillary adenocarcinoma, NOS
H2B clustered histone 14	Q99879	126	381	0	0	Papillary adenocarcinoma, NOS
H3.Y histone 2	P0DPK5	147	444	0	0	Papillary adenocarcinoma, NOS
Histone H2A type 3	Q7L7L0	130	393	1	0.00254453	Papillary adenocarcinoma, NOS
H2A clustered histone 7	P20671	130	393	0	0	Papillary adenocarcinoma, NOS
Histone H3-7	Q5TEC6	136	411	0	0	Papillary adenocarcinoma, NOS
H1.7 linker histone	Q75WM6	255	768	1	0.00130208	Papillary adenocarcinoma, NOS
H1.5 linker histone, cluster member	P16401	226	681	1	0.00146843	Papillary adenocarcinoma, NOS
H1.4 linker histone, cluster member	P10412	219	660	1	0.00151515	Papillary adenocarcinoma, NOS
H2A clustered histone 11	P0C0S8	130	1965	1	0.000508906	Papillary adenocarcinoma, NOS
H3.3 histone A	P84243	136	822	0	0	Papillary adenocarcinoma, NOS
H2B clustered histone 1	Q96A08	127	384	0	0	Papillary adenocarcinoma, NOS
H3.5 histone	Q6NXT2	135	408	0	0	Papillary adenocarcinoma, NOS
H3 clustered histone 1	P68431	136	4110	8	0.00194647	Papillary adenocarcinoma, NOS
H1.2 linker histone, cluster member	P16403	213	642	2	0.00311526	Papillary adenocarcinoma, NOS
H3 clustered histone 13	Q71DI3	136	1233	0	0	Papillary adenocarcinoma, NOS
H1.3 linker histone, cluster member	P16402	221	666	0	0	Papillary adenocarcinoma, NOS
H2B clustered histone 12	O60814	126	381	0	0	Papillary adenocarcinoma, NOS
H1.1 linker histone, cluster member	Q02539	215	648	0	0	Papillary adenocarcinoma, NOS
H2A clustered histone 12	Q96KK5	128	387	1	0.00258398	Papillary adenocarcinoma, NOS
H2A clustered histone 20	Q16777	129	390	1	0.0025641	Papillary adenocarcinoma, NOS
H2B clustered histone 18	Q5QNW6	126	786	0	0	Papillary adenocarcinoma, NOS
H2A clustered histone 1	Q96QV6	131	396	0	0	Papillary adenocarcinoma, NOS
H1.6 linker histone, cluster member	P22492	207	624	1	0.00160256	Papillary adenocarcinoma, NOS
H2B.W histone 2	P0C1H6	154	447	0	0	Papillary adenocarcinoma, NOS
centromere protein A	P49450	140	423	1	0.00236407	Papillary adenocarcinoma, NOS
H1.10 linker histone	Q92522	213	642	1	0.00155763	Papillary adenocarcinoma, NOS
Histone H2B type 2-K1	A0A2R8Y619	122	369	0	0	Papillary adenocarcinoma, NOS
H2B clustered histone 11	P06899	126	381	1	0.00262467	Papillary adenocarcinoma, NOS
H2A.Z variant histone 2	Q71UI9	128	413	0	0	Papillary adenocarcinoma, NOS
H1.0 linker histone	P07305	194	585	0	0	Papillary adenocarcinoma, NOS
H2B clustered histone 15	Q99877	126	381	1	0.00262467	Papillary adenocarcinoma, NOS
H2A clustered histone 14	Q99878	128	387	0	0	Papillary adenocarcinoma, NOS
H2A.J histone	Q9BTM1	129	390	2	0.00512821	Papillary adenocarcinoma, NOS
H2B clustered histone 5	P58876	126	381	1	0.00262467	Papillary adenocarcinoma, NOS
H4 clustered histone 7	Q99525	98	297	1	0.003367	Papillary adenocarcinoma, NOS
H2B clustered histone 13	Q99880	126	381	4	0.0104987	Papillary adenocarcinoma, NOS
H2B clustered histone 3	P33778	126	381	2	0.00524934	Papillary adenocarcinoma, NOS
H3.Y histone 1	P0DPK2	136	411	0	0	Papillary adenocarcinoma, NOS
H2A.P histone	O75409	117	354	2	0.00564972	Papillary adenocarcinoma, NOS
H2A.B variant histone 1	P0C5Y9	115	348	1	0.00287356	Papillary adenocarcinoma, NOS
H4 clustered histone 1	P62805	103	4368	5	0.00114469	Papillary adenocarcinoma, NOS
macroH2A.1 histone	O75367	369	1318	0	0	Papillary adenocarcinoma, NOS
H2A.B variant histone 2	P0C5Z0	115	696	0	0	Papillary adenocarcinoma, NOS
H3.4 histone	Q16695	136	411	0	0	Papillary adenocarcinoma, NOS
H2B clustered histone 9	Q93079	126	381	0	0	Papillary adenocarcinoma, NOS
H2A clustered histone 4	P04908	130	786	3	0.00381679	Papillary adenocarcinoma, NOS
macroH2A.2 histone	Q9P0M6	372	1119	1	0.000893655	Papillary adenocarcinoma, NOS
H2B clustered histone 17	P23527	126	381	1	0.00262467	Papillary adenocarcinoma, NOS
H2B clustered histone 21	Q16778	126	381	1	0.00262467	Papillary adenocarcinoma, NOS
H2B.W histone 1	Q7Z2G1	175	444	0	0	Papillary adenocarcinoma, NOS
H2A clustered histone 21	Q8IUE6	130	393	0	0	Thymoma, type B3, malignant
Histone H2B type F-S	P57053	126	467	0	0	Thymoma, type B3, malignant
H2A clustered histone 18	Q6FI13	130	786	0	0	Thymoma, type B3, malignant
H2A.Z variant histone 1	P0C0S5	128	387	0	0	Thymoma, type B3, malignant
H2A.X variant histone	P16104	143	432	0	0	Thymoma, type B3, malignant
H2B clustered histone 10	P62807	126	1905	0	0	Thymoma, type B3, malignant
Histone H2A-like 3	A0A3B3IU63	148	447	0	0	Thymoma, type B3, malignant
Histone H2B type 3-B	Q8N257	126	381	0	0	Thymoma, type B3, malignant
H2A clustered histone 6	Q93077	130	393	0	0	Thymoma, type B3, malignant
H1.8 linker histone	Q8IZA3	346	1366	0	0	Thymoma, type B3, malignant
H2B clustered histone 14	Q99879	126	381	0	0	Thymoma, type B3, malignant
H3.Y histone 2	P0DPK5	147	444	0	0	Thymoma, type B3, malignant
Histone H2A type 3	Q7L7L0	130	393	0	0	Thymoma, type B3, malignant
H2A clustered histone 7	P20671	130	393	0	0	Thymoma, type B3, malignant
Histone H3-7	Q5TEC6	136	411	0	0	Thymoma, type B3, malignant
H1.7 linker histone	Q75WM6	255	768	0	0	Thymoma, type B3, malignant
H1.5 linker histone, cluster member	P16401	226	681	0	0	Thymoma, type B3, malignant
H1.4 linker histone, cluster member	P10412	219	660	0	0	Thymoma, type B3, malignant
H2A clustered histone 11	P0C0S8	130	1965	0	0	Thymoma, type B3, malignant
H3.3 histone A	P84243	136	822	1	0.00121655	Thymoma, type B3, malignant
H2B clustered histone 1	Q96A08	127	384	0	0	Thymoma, type B3, malignant
H3.5 histone	Q6NXT2	135	408	0	0	Thymoma, type B3, malignant
H3 clustered histone 1	P68431	136	4110	0	0	Thymoma, type B3, malignant
H1.2 linker histone, cluster member	P16403	213	642	0	0	Thymoma, type B3, malignant
H3 clustered histone 13	Q71DI3	136	1233	0	0	Thymoma, type B3, malignant
H1.3 linker histone, cluster member	P16402	221	666	0	0	Thymoma, type B3, malignant
H2B clustered histone 12	O60814	126	381	0	0	Thymoma, type B3, malignant
H1.1 linker histone, cluster member	Q02539	215	648	0	0	Thymoma, type B3, malignant
H2A clustered histone 12	Q96KK5	128	387	0	0	Thymoma, type B3, malignant
H2A clustered histone 20	Q16777	129	390	0	0	Thymoma, type B3, malignant
H2B clustered histone 18	Q5QNW6	126	786	0	0	Thymoma, type B3, malignant
H2A clustered histone 1	Q96QV6	131	396	0	0	Thymoma, type B3, malignant
H1.6 linker histone, cluster member	P22492	207	624	0	0	Thymoma, type B3, malignant
H2B.W histone 2	P0C1H6	154	447	0	0	Thymoma, type B3, malignant
centromere protein A	P49450	140	423	0	0	Thymoma, type B3, malignant
H1.10 linker histone	Q92522	213	642	0	0	Thymoma, type B3, malignant
Histone H2B type 2-K1	A0A2R8Y619	122	369	0	0	Thymoma, type B3, malignant
H2B clustered histone 11	P06899	126	381	0	0	Thymoma, type B3, malignant
H2A.Z variant histone 2	Q71UI9	128	413	0	0	Thymoma, type B3, malignant
H1.0 linker histone	P07305	194	585	0	0	Thymoma, type B3, malignant
H2B clustered histone 15	Q99877	126	381	0	0	Thymoma, type B3, malignant
H2A clustered histone 14	Q99878	128	387	0	0	Thymoma, type B3, malignant
H2A.J histone	Q9BTM1	129	390	0	0	Thymoma, type B3, malignant
H2B clustered histone 5	P58876	126	381	0	0	Thymoma, type B3, malignant
H4 clustered histone 7	Q99525	98	297	0	0	Thymoma, type B3, malignant
H2B clustered histone 13	Q99880	126	381	0	0	Thymoma, type B3, malignant
H2B clustered histone 3	P33778	126	381	0	0	Thymoma, type B3, malignant
H3.Y histone 1	P0DPK2	136	411	0	0	Thymoma, type B3, malignant
H2A.P histone	O75409	117	354	0	0	Thymoma, type B3, malignant
H2A.B variant histone 1	P0C5Y9	115	348	0	0	Thymoma, type B3, malignant
H4 clustered histone 1	P62805	103	4368	0	0	Thymoma, type B3, malignant
macroH2A.1 histone	O75367	369	1318	0	0	Thymoma, type B3, malignant
H2A.B variant histone 2	P0C5Z0	115	696	0	0	Thymoma, type B3, malignant
H3.4 histone	Q16695	136	411	0	0	Thymoma, type B3, malignant
H2B clustered histone 9	Q93079	126	381	0	0	Thymoma, type B3, malignant
H2A clustered histone 4	P04908	130	786	0	0	Thymoma, type B3, malignant
macroH2A.2 histone	Q9P0M6	372	1119	0	0	Thymoma, type B3, malignant
H2B clustered histone 17	P23527	126	381	0	0	Thymoma, type B3, malignant
H2B clustered histone 21	Q16778	126	381	0	0	Thymoma, type B3, malignant
H2B.W histone 1	Q7Z2G1	175	444	0	0	Thymoma, type B3, malignant
H2A clustered histone 21	Q8IUE6	130	393	0	0	Astrocytoma, anaplastic
Histone H2B type F-S	P57053	126	467	0	0	Astrocytoma, anaplastic
H2A clustered histone 18	Q6FI13	130	786	0	0	Astrocytoma, anaplastic
H2A.Z variant histone 1	P0C0S5	128	387	0	0	Astrocytoma, anaplastic
H2A.X variant histone	P16104	143	432	0	0	Astrocytoma, anaplastic
H2B clustered histone 10	P62807	126	1905	0	0	Astrocytoma, anaplastic
Histone H2A-like 3	A0A3B3IU63	148	447	0	0	Astrocytoma, anaplastic
Histone H2B type 3-B	Q8N257	126	381	0	0	Astrocytoma, anaplastic
H2A clustered histone 6	Q93077	130	393	1	0.00254453	Astrocytoma, anaplastic
H1.8 linker histone	Q8IZA3	346	1366	0	0	Astrocytoma, anaplastic
H2B clustered histone 14	Q99879	126	381	0	0	Astrocytoma, anaplastic
H3.Y histone 2	P0DPK5	147	444	0	0	Astrocytoma, anaplastic
Histone H2A type 3	Q7L7L0	130	393	0	0	Astrocytoma, anaplastic
H2A clustered histone 7	P20671	130	393	0	0	Astrocytoma, anaplastic
Histone H3-7	Q5TEC6	136	411	0	0	Astrocytoma, anaplastic
H1.7 linker histone	Q75WM6	255	768	0	0	Astrocytoma, anaplastic
H1.5 linker histone, cluster member	P16401	226	681	0	0	Astrocytoma, anaplastic
H1.4 linker histone, cluster member	P10412	219	660	1	0.00151515	Astrocytoma, anaplastic
H2A clustered histone 11	P0C0S8	130	1965	1	0.000508906	Astrocytoma, anaplastic
H3.3 histone A	P84243	136	822	2	0.00243309	Astrocytoma, anaplastic
H2B clustered histone 1	Q96A08	127	384	1	0.00260417	Astrocytoma, anaplastic
H3.5 histone	Q6NXT2	135	408	1	0.00245098	Astrocytoma, anaplastic
H3 clustered histone 1	P68431	136	4110	1	0.000243309	Astrocytoma, anaplastic
H1.2 linker histone, cluster member	P16403	213	642	0	0	Astrocytoma, anaplastic
H3 clustered histone 13	Q71DI3	136	1233	1	0.00081103	Astrocytoma, anaplastic
H1.3 linker histone, cluster member	P16402	221	666	1	0.0015015	Astrocytoma, anaplastic
H2B clustered histone 12	O60814	126	381	0	0	Astrocytoma, anaplastic
H1.1 linker histone, cluster member	Q02539	215	648	0	0	Astrocytoma, anaplastic
H2A clustered histone 12	Q96KK5	128	387	0	0	Astrocytoma, anaplastic
H2A clustered histone 20	Q16777	129	390	0	0	Astrocytoma, anaplastic
H2B clustered histone 18	Q5QNW6	126	786	0	0	Astrocytoma, anaplastic
H2A clustered histone 1	Q96QV6	131	396	0	0	Astrocytoma, anaplastic
H1.6 linker histone, cluster member	P22492	207	624	0	0	Astrocytoma, anaplastic
H2B.W histone 2	P0C1H6	154	447	0	0	Astrocytoma, anaplastic
centromere protein A	P49450	140	423	0	0	Astrocytoma, anaplastic
H1.10 linker histone	Q92522	213	642	0	0	Astrocytoma, anaplastic
Histone H2B type 2-K1	A0A2R8Y619	122	369	0	0	Astrocytoma, anaplastic
H2B clustered histone 11	P06899	126	381	1	0.00262467	Astrocytoma, anaplastic
H2A.Z variant histone 2	Q71UI9	128	413	0	0	Astrocytoma, anaplastic
H1.0 linker histone	P07305	194	585	0	0	Astrocytoma, anaplastic
H2B clustered histone 15	Q99877	126	381	0	0	Astrocytoma, anaplastic
H2A clustered histone 14	Q99878	128	387	0	0	Astrocytoma, anaplastic
H2A.J histone	Q9BTM1	129	390	0	0	Astrocytoma, anaplastic
H2B clustered histone 5	P58876	126	381	0	0	Astrocytoma, anaplastic
H4 clustered histone 7	Q99525	98	297	0	0	Astrocytoma, anaplastic
H2B clustered histone 13	Q99880	126	381	0	0	Astrocytoma, anaplastic
H2B clustered histone 3	P33778	126	381	0	0	Astrocytoma, anaplastic
H3.Y histone 1	P0DPK2	136	411	0	0	Astrocytoma, anaplastic
H2A.P histone	O75409	117	354	0	0	Astrocytoma, anaplastic
H2A.B variant histone 1	P0C5Y9	115	348	0	0	Astrocytoma, anaplastic
H4 clustered histone 1	P62805	103	4368	1	0.000228938	Astrocytoma, anaplastic
macroH2A.1 histone	O75367	369	1318	2	0.00151745	Astrocytoma, anaplastic
H2A.B variant histone 2	P0C5Z0	115	696	0	0	Astrocytoma, anaplastic
H3.4 histone	Q16695	136	411	0	0	Astrocytoma, anaplastic
H2B clustered histone 9	Q93079	126	381	0	0	Astrocytoma, anaplastic
H2A clustered histone 4	P04908	130	786	1	0.00127226	Astrocytoma, anaplastic
macroH2A.2 histone	Q9P0M6	372	1119	0	0	Astrocytoma, anaplastic
H2B clustered histone 17	P23527	126	381	0	0	Astrocytoma, anaplastic
H2B clustered histone 21	Q16778	126	381	0	0	Astrocytoma, anaplastic
H2B.W histone 1	Q7Z2G1	175	444	0	0	Astrocytoma, anaplastic
H2A clustered histone 21	Q8IUE6	130	393	0	0	Basaloid squamous cell carcinoma
Histone H2B type F-S	P57053	126	467	0	0	Basaloid squamous cell carcinoma
H2A clustered histone 18	Q6FI13	130	786	0	0	Basaloid squamous cell carcinoma
H2A.Z variant histone 1	P0C0S5	128	387	0	0	Basaloid squamous cell carcinoma
H2A.X variant histone	P16104	143	432	1	0.00231481	Basaloid squamous cell carcinoma
H2B clustered histone 10	P62807	126	1905	1	0.000524934	Basaloid squamous cell carcinoma
Histone H2A-like 3	A0A3B3IU63	148	447	0	0	Basaloid squamous cell carcinoma
Histone H2B type 3-B	Q8N257	126	381	0	0	Basaloid squamous cell carcinoma
H2A clustered histone 6	Q93077	130	393	0	0	Basaloid squamous cell carcinoma
H1.8 linker histone	Q8IZA3	346	1366	0	0	Basaloid squamous cell carcinoma
H2B clustered histone 14	Q99879	126	381	0	0	Basaloid squamous cell carcinoma
H3.Y histone 2	P0DPK5	147	444	0	0	Basaloid squamous cell carcinoma
Histone H2A type 3	Q7L7L0	130	393	0	0	Basaloid squamous cell carcinoma
H2A clustered histone 7	P20671	130	393	0	0	Basaloid squamous cell carcinoma
Histone H3-7	Q5TEC6	136	411	0	0	Basaloid squamous cell carcinoma
H1.7 linker histone	Q75WM6	255	768	1	0.00130208	Basaloid squamous cell carcinoma
H1.5 linker histone, cluster member	P16401	226	681	1	0.00146843	Basaloid squamous cell carcinoma
H1.4 linker histone, cluster member	P10412	219	660	0	0	Basaloid squamous cell carcinoma
H2A clustered histone 11	P0C0S8	130	1965	1	0.000508906	Basaloid squamous cell carcinoma
H3.3 histone A	P84243	136	822	2	0.00243309	Basaloid squamous cell carcinoma
H2B clustered histone 1	Q96A08	127	384	0	0	Basaloid squamous cell carcinoma
H3.5 histone	Q6NXT2	135	408	0	0	Basaloid squamous cell carcinoma
H3 clustered histone 1	P68431	136	4110	3	0.000729927	Basaloid squamous cell carcinoma
H1.2 linker histone, cluster member	P16403	213	642	0	0	Basaloid squamous cell carcinoma
H3 clustered histone 13	Q71DI3	136	1233	0	0	Basaloid squamous cell carcinoma
H1.3 linker histone, cluster member	P16402	221	666	0	0	Basaloid squamous cell carcinoma
H2B clustered histone 12	O60814	126	381	0	0	Basaloid squamous cell carcinoma
H1.1 linker histone, cluster member	Q02539	215	648	0	0	Basaloid squamous cell carcinoma
H2A clustered histone 12	Q96KK5	128	387	0	0	Basaloid squamous cell carcinoma
H2A clustered histone 20	Q16777	129	390	0	0	Basaloid squamous cell carcinoma
H2B clustered histone 18	Q5QNW6	126	786	0	0	Basaloid squamous cell carcinoma
H2A clustered histone 1	Q96QV6	131	396	0	0	Basaloid squamous cell carcinoma
H1.6 linker histone, cluster member	P22492	207	624	0	0	Basaloid squamous cell carcinoma
H2B.W histone 2	P0C1H6	154	447	0	0	Basaloid squamous cell carcinoma
centromere protein A	P49450	140	423	0	0	Basaloid squamous cell carcinoma
H1.10 linker histone	Q92522	213	642	0	0	Basaloid squamous cell carcinoma
Histone H2B type 2-K1	A0A2R8Y619	122	369	0	0	Basaloid squamous cell carcinoma
H2B clustered histone 11	P06899	126	381	0	0	Basaloid squamous cell carcinoma
H2A.Z variant histone 2	Q71UI9	128	413	0	0	Basaloid squamous cell carcinoma
H1.0 linker histone	P07305	194	585	0	0	Basaloid squamous cell carcinoma
H2B clustered histone 15	Q99877	126	381	3	0.00787402	Basaloid squamous cell carcinoma
H2A clustered histone 14	Q99878	128	387	0	0	Basaloid squamous cell carcinoma
H2A.J histone	Q9BTM1	129	390	0	0	Basaloid squamous cell carcinoma
H2B clustered histone 5	P58876	126	381	0	0	Basaloid squamous cell carcinoma
H4 clustered histone 7	Q99525	98	297	1	0.003367	Basaloid squamous cell carcinoma
H2B clustered histone 13	Q99880	126	381	1	0.00262467	Basaloid squamous cell carcinoma
H2B clustered histone 3	P33778	126	381	0	0	Basaloid squamous cell carcinoma
H3.Y histone 1	P0DPK2	136	411	0	0	Basaloid squamous cell carcinoma
H2A.P histone	O75409	117	354	0	0	Basaloid squamous cell carcinoma
H2A.B variant histone 1	P0C5Y9	115	348	0	0	Basaloid squamous cell carcinoma
H4 clustered histone 1	P62805	103	4368	3	0.000686813	Basaloid squamous cell carcinoma
macroH2A.1 histone	O75367	369	1318	0	0	Basaloid squamous cell carcinoma
H2A.B variant histone 2	P0C5Z0	115	696	0	0	Basaloid squamous cell carcinoma
H3.4 histone	Q16695	136	411	0	0	Basaloid squamous cell carcinoma
H2B clustered histone 9	Q93079	126	381	0	0	Basaloid squamous cell carcinoma
H2A clustered histone 4	P04908	130	786	0	0	Basaloid squamous cell carcinoma
macroH2A.2 histone	Q9P0M6	372	1119	1	0.000893655	Basaloid squamous cell carcinoma
H2B clustered histone 17	P23527	126	381	0	0	Basaloid squamous cell carcinoma
H2B clustered histone 21	Q16778	126	381	0	0	Basaloid squamous cell carcinoma
H2B.W histone 1	Q7Z2G1	175	444	1	0.00225225	Basaloid squamous cell carcinoma
H2A clustered histone 21	Q8IUE6	130	393	0	0	Seminoma, NOS
Histone H2B type F-S	P57053	126	467	0	0	Seminoma, NOS
H2A clustered histone 18	Q6FI13	130	786	0	0	Seminoma, NOS
H2A.Z variant histone 1	P0C0S5	128	387	0	0	Seminoma, NOS
H2A.X variant histone	P16104	143	432	0	0	Seminoma, NOS
H2B clustered histone 10	P62807	126	1905	0	0	Seminoma, NOS
Histone H2A-like 3	A0A3B3IU63	148	447	0	0	Seminoma, NOS
Histone H2B type 3-B	Q8N257	126	381	0	0	Seminoma, NOS
H2A clustered histone 6	Q93077	130	393	0	0	Seminoma, NOS
H1.8 linker histone	Q8IZA3	346	1366	0	0	Seminoma, NOS
H2B clustered histone 14	Q99879	126	381	0	0	Seminoma, NOS
H3.Y histone 2	P0DPK5	147	444	0	0	Seminoma, NOS
Histone H2A type 3	Q7L7L0	130	393	0	0	Seminoma, NOS
H2A clustered histone 7	P20671	130	393	0	0	Seminoma, NOS
Histone H3-7	Q5TEC6	136	411	0	0	Seminoma, NOS
H1.7 linker histone	Q75WM6	255	768	0	0	Seminoma, NOS
H1.5 linker histone, cluster member	P16401	226	681	0	0	Seminoma, NOS
H1.4 linker histone, cluster member	P10412	219	660	0	0	Seminoma, NOS
H2A clustered histone 11	P0C0S8	130	1965	1	0.000508906	Seminoma, NOS
H3.3 histone A	P84243	136	822	0	0	Seminoma, NOS
H2B clustered histone 1	Q96A08	127	384	0	0	Seminoma, NOS
H3.5 histone	Q6NXT2	135	408	0	0	Seminoma, NOS
H3 clustered histone 1	P68431	136	4110	3	0.000729927	Seminoma, NOS
H1.2 linker histone, cluster member	P16403	213	642	0	0	Seminoma, NOS
H3 clustered histone 13	Q71DI3	136	1233	0	0	Seminoma, NOS
H1.3 linker histone, cluster member	P16402	221	666	0	0	Seminoma, NOS
H2B clustered histone 12	O60814	126	381	0	0	Seminoma, NOS
H1.1 linker histone, cluster member	Q02539	215	648	0	0	Seminoma, NOS
H2A clustered histone 12	Q96KK5	128	387	0	0	Seminoma, NOS
H2A clustered histone 20	Q16777	129	390	0	0	Seminoma, NOS
H2B clustered histone 18	Q5QNW6	126	786	0	0	Seminoma, NOS
H2A clustered histone 1	Q96QV6	131	396	0	0	Seminoma, NOS
H1.6 linker histone, cluster member	P22492	207	624	0	0	Seminoma, NOS
H2B.W histone 2	P0C1H6	154	447	0	0	Seminoma, NOS
centromere protein A	P49450	140	423	0	0	Seminoma, NOS
H1.10 linker histone	Q92522	213	642	0	0	Seminoma, NOS
Histone H2B type 2-K1	A0A2R8Y619	122	369	0	0	Seminoma, NOS
H2B clustered histone 11	P06899	126	381	0	0	Seminoma, NOS
H2A.Z variant histone 2	Q71UI9	128	413	0	0	Seminoma, NOS
H1.0 linker histone	P07305	194	585	0	0	Seminoma, NOS
H2B clustered histone 15	Q99877	126	381	0	0	Seminoma, NOS
H2A clustered histone 14	Q99878	128	387	0	0	Seminoma, NOS
H2A.J histone	Q9BTM1	129	390	0	0	Seminoma, NOS
H2B clustered histone 5	P58876	126	381	0	0	Seminoma, NOS
H4 clustered histone 7	Q99525	98	297	0	0	Seminoma, NOS
H2B clustered histone 13	Q99880	126	381	0	0	Seminoma, NOS
H2B clustered histone 3	P33778	126	381	0	0	Seminoma, NOS
H3.Y histone 1	P0DPK2	136	411	0	0	Seminoma, NOS
H2A.P histone	O75409	117	354	0	0	Seminoma, NOS
H2A.B variant histone 1	P0C5Y9	115	348	0	0	Seminoma, NOS
H4 clustered histone 1	P62805	103	4368	0	0	Seminoma, NOS
macroH2A.1 histone	O75367	369	1318	0	0	Seminoma, NOS
H2A.B variant histone 2	P0C5Z0	115	696	0	0	Seminoma, NOS
H3.4 histone	Q16695	136	411	0	0	Seminoma, NOS
H2B clustered histone 9	Q93079	126	381	0	0	Seminoma, NOS
H2A clustered histone 4	P04908	130	786	0	0	Seminoma, NOS
macroH2A.2 histone	Q9P0M6	372	1119	0	0	Seminoma, NOS
H2B clustered histone 17	P23527	126	381	0	0	Seminoma, NOS
H2B clustered histone 21	Q16778	126	381	0	0	Seminoma, NOS
H2B.W histone 1	Q7Z2G1	175	444	0	0	Seminoma, NOS
H2A clustered histone 21	Q8IUE6	130	393	0	0	Adenocarcinoma with mixed subtypes
Histone H2B type F-S	P57053	126	467	0	0	Adenocarcinoma with mixed subtypes
H2A clustered histone 18	Q6FI13	130	786	0	0	Adenocarcinoma with mixed subtypes
H2A.Z variant histone 1	P0C0S5	128	387	0	0	Adenocarcinoma with mixed subtypes
H2A.X variant histone	P16104	143	432	1	0.00231481	Adenocarcinoma with mixed subtypes
H2B clustered histone 10	P62807	126	1905	6	0.00314961	Adenocarcinoma with mixed subtypes
Histone H2A-like 3	A0A3B3IU63	148	447	0	0	Adenocarcinoma with mixed subtypes
Histone H2B type 3-B	Q8N257	126	381	2	0.00524934	Adenocarcinoma with mixed subtypes
H2A clustered histone 6	Q93077	130	393	1	0.00254453	Adenocarcinoma with mixed subtypes
H1.8 linker histone	Q8IZA3	346	1366	0	0	Adenocarcinoma with mixed subtypes
H2B clustered histone 14	Q99879	126	381	0	0	Adenocarcinoma with mixed subtypes
H3.Y histone 2	P0DPK5	147	444	0	0	Adenocarcinoma with mixed subtypes
Histone H2A type 3	Q7L7L0	130	393	1	0.00254453	Adenocarcinoma with mixed subtypes
H2A clustered histone 7	P20671	130	393	0	0	Adenocarcinoma with mixed subtypes
Histone H3-7	Q5TEC6	136	411	0	0	Adenocarcinoma with mixed subtypes
H1.7 linker histone	Q75WM6	255	768	1	0.00130208	Adenocarcinoma with mixed subtypes
H1.5 linker histone, cluster member	P16401	226	681	2	0.00293686	Adenocarcinoma with mixed subtypes
H1.4 linker histone, cluster member	P10412	219	660	1	0.00151515	Adenocarcinoma with mixed subtypes
H2A clustered histone 11	P0C0S8	130	1965	5	0.00254453	Adenocarcinoma with mixed subtypes
H3.3 histone A	P84243	136	822	1	0.00121655	Adenocarcinoma with mixed subtypes
H2B clustered histone 1	Q96A08	127	384	0	0	Adenocarcinoma with mixed subtypes
H3.5 histone	Q6NXT2	135	408	2	0.00490196	Adenocarcinoma with mixed subtypes
H3 clustered histone 1	P68431	136	4110	17	0.00413625	Adenocarcinoma with mixed subtypes
H1.2 linker histone, cluster member	P16403	213	642	2	0.00311526	Adenocarcinoma with mixed subtypes
H3 clustered histone 13	Q71DI3	136	1233	0	0	Adenocarcinoma with mixed subtypes
H1.3 linker histone, cluster member	P16402	221	666	2	0.003003	Adenocarcinoma with mixed subtypes
H2B clustered histone 12	O60814	126	381	0	0	Adenocarcinoma with mixed subtypes
H1.1 linker histone, cluster member	Q02539	215	648	0	0	Adenocarcinoma with mixed subtypes
H2A clustered histone 12	Q96KK5	128	387	1	0.00258398	Adenocarcinoma with mixed subtypes
H2A clustered histone 20	Q16777	129	390	1	0.0025641	Adenocarcinoma with mixed subtypes
H2B clustered histone 18	Q5QNW6	126	786	0	0	Adenocarcinoma with mixed subtypes
H2A clustered histone 1	Q96QV6	131	396	0	0	Adenocarcinoma with mixed subtypes
H1.6 linker histone, cluster member	P22492	207	624	1	0.00160256	Adenocarcinoma with mixed subtypes
H2B.W histone 2	P0C1H6	154	447	0	0	Adenocarcinoma with mixed subtypes
centromere protein A	P49450	140	423	1	0.00236407	Adenocarcinoma with mixed subtypes
H1.10 linker histone	Q92522	213	642	0	0	Adenocarcinoma with mixed subtypes
Histone H2B type 2-K1	A0A2R8Y619	122	369	0	0	Adenocarcinoma with mixed subtypes
H2B clustered histone 11	P06899	126	381	0	0	Adenocarcinoma with mixed subtypes
H2A.Z variant histone 2	Q71UI9	128	413	0	0	Adenocarcinoma with mixed subtypes
H1.0 linker histone	P07305	194	585	1	0.0017094	Adenocarcinoma with mixed subtypes
H2B clustered histone 15	Q99877	126	381	0	0	Adenocarcinoma with mixed subtypes
H2A clustered histone 14	Q99878	128	387	1	0.00258398	Adenocarcinoma with mixed subtypes
H2A.J histone	Q9BTM1	129	390	0	0	Adenocarcinoma with mixed subtypes
H2B clustered histone 5	P58876	126	381	0	0	Adenocarcinoma with mixed subtypes
H4 clustered histone 7	Q99525	98	297	0	0	Adenocarcinoma with mixed subtypes
H2B clustered histone 13	Q99880	126	381	0	0	Adenocarcinoma with mixed subtypes
H2B clustered histone 3	P33778	126	381	1	0.00262467	Adenocarcinoma with mixed subtypes
H3.Y histone 1	P0DPK2	136	411	0	0	Adenocarcinoma with mixed subtypes
H2A.P histone	O75409	117	354	2	0.00564972	Adenocarcinoma with mixed subtypes
H2A.B variant histone 1	P0C5Y9	115	348	0	0	Adenocarcinoma with mixed subtypes
H4 clustered histone 1	P62805	103	4368	3	0.000686813	Adenocarcinoma with mixed subtypes
macroH2A.1 histone	O75367	369	1318	1	0.000758725	Adenocarcinoma with mixed subtypes
H2A.B variant histone 2	P0C5Z0	115	696	0	0	Adenocarcinoma with mixed subtypes
H3.4 histone	Q16695	136	411	5	0.0121655	Adenocarcinoma with mixed subtypes
H2B clustered histone 9	Q93079	126	381	3	0.00787402	Adenocarcinoma with mixed subtypes
H2A clustered histone 4	P04908	130	786	2	0.00254453	Adenocarcinoma with mixed subtypes
macroH2A.2 histone	Q9P0M6	372	1119	1	0.000893655	Adenocarcinoma with mixed subtypes
H2B clustered histone 17	P23527	126	381	0	0	Adenocarcinoma with mixed subtypes
H2B clustered histone 21	Q16778	126	381	1	0.00262467	Adenocarcinoma with mixed subtypes
H2B.W histone 1	Q7Z2G1	175	444	3	0.00675676	Adenocarcinoma with mixed subtypes
H2A clustered histone 21	Q8IUE6	130	393	0	0	Squamous cell carcinoma, keratinizing, NOS
Histone H2B type F-S	P57053	126	467	0	0	Squamous cell carcinoma, keratinizing, NOS
H2A clustered histone 18	Q6FI13	130	786	0	0	Squamous cell carcinoma, keratinizing, NOS
H2A.Z variant histone 1	P0C0S5	128	387	0	0	Squamous cell carcinoma, keratinizing, NOS
H2A.X variant histone	P16104	143	432	1	0.00231481	Squamous cell carcinoma, keratinizing, NOS
H2B clustered histone 10	P62807	126	1905	4	0.00209974	Squamous cell carcinoma, keratinizing, NOS
Histone H2A-like 3	A0A3B3IU63	148	447	0	0	Squamous cell carcinoma, keratinizing, NOS
Histone H2B type 3-B	Q8N257	126	381	0	0	Squamous cell carcinoma, keratinizing, NOS
H2A clustered histone 6	Q93077	130	393	0	0	Squamous cell carcinoma, keratinizing, NOS
H1.8 linker histone	Q8IZA3	346	1366	0	0	Squamous cell carcinoma, keratinizing, NOS
H2B clustered histone 14	Q99879	126	381	0	0	Squamous cell carcinoma, keratinizing, NOS
H3.Y histone 2	P0DPK5	147	444	0	0	Squamous cell carcinoma, keratinizing, NOS
Histone H2A type 3	Q7L7L0	130	393	1	0.00254453	Squamous cell carcinoma, keratinizing, NOS
H2A clustered histone 7	P20671	130	393	0	0	Squamous cell carcinoma, keratinizing, NOS
Histone H3-7	Q5TEC6	136	411	0	0	Squamous cell carcinoma, keratinizing, NOS
H1.7 linker histone	Q75WM6	255	768	0	0	Squamous cell carcinoma, keratinizing, NOS
H1.5 linker histone, cluster member	P16401	226	681	2	0.00293686	Squamous cell carcinoma, keratinizing, NOS
H1.4 linker histone, cluster member	P10412	219	660	0	0	Squamous cell carcinoma, keratinizing, NOS
H2A clustered histone 11	P0C0S8	130	1965	2	0.00101781	Squamous cell carcinoma, keratinizing, NOS
H3.3 histone A	P84243	136	822	0	0	Squamous cell carcinoma, keratinizing, NOS
H2B clustered histone 1	Q96A08	127	384	1	0.00260417	Squamous cell carcinoma, keratinizing, NOS
H3.5 histone	Q6NXT2	135	408	0	0	Squamous cell carcinoma, keratinizing, NOS
H3 clustered histone 1	P68431	136	4110	8	0.00194647	Squamous cell carcinoma, keratinizing, NOS
H1.2 linker histone, cluster member	P16403	213	642	1	0.00155763	Squamous cell carcinoma, keratinizing, NOS
H3 clustered histone 13	Q71DI3	136	1233	1	0.00081103	Squamous cell carcinoma, keratinizing, NOS
H1.3 linker histone, cluster member	P16402	221	666	1	0.0015015	Squamous cell carcinoma, keratinizing, NOS
H2B clustered histone 12	O60814	126	381	0	0	Squamous cell carcinoma, keratinizing, NOS
H1.1 linker histone, cluster member	Q02539	215	648	1	0.00154321	Squamous cell carcinoma, keratinizing, NOS
H2A clustered histone 12	Q96KK5	128	387	0	0	Squamous cell carcinoma, keratinizing, NOS
H2A clustered histone 20	Q16777	129	390	0	0	Squamous cell carcinoma, keratinizing, NOS
H2B clustered histone 18	Q5QNW6	126	786	1	0.00127226	Squamous cell carcinoma, keratinizing, NOS
H2A clustered histone 1	Q96QV6	131	396	0	0	Squamous cell carcinoma, keratinizing, NOS
H1.6 linker histone, cluster member	P22492	207	624	0	0	Squamous cell carcinoma, keratinizing, NOS
H2B.W histone 2	P0C1H6	154	447	0	0	Squamous cell carcinoma, keratinizing, NOS
centromere protein A	P49450	140	423	0	0	Squamous cell carcinoma, keratinizing, NOS
H1.10 linker histone	Q92522	213	642	0	0	Squamous cell carcinoma, keratinizing, NOS
Histone H2B type 2-K1	A0A2R8Y619	122	369	0	0	Squamous cell carcinoma, keratinizing, NOS
H2B clustered histone 11	P06899	126	381	1	0.00262467	Squamous cell carcinoma, keratinizing, NOS
H2A.Z variant histone 2	Q71UI9	128	413	0	0	Squamous cell carcinoma, keratinizing, NOS
H1.0 linker histone	P07305	194	585	0	0	Squamous cell carcinoma, keratinizing, NOS
H2B clustered histone 15	Q99877	126	381	1	0.00262467	Squamous cell carcinoma, keratinizing, NOS
H2A clustered histone 14	Q99878	128	387	1	0.00258398	Squamous cell carcinoma, keratinizing, NOS
H2A.J histone	Q9BTM1	129	390	0	0	Squamous cell carcinoma, keratinizing, NOS
H2B clustered histone 5	P58876	126	381	3	0.00787402	Squamous cell carcinoma, keratinizing, NOS
H4 clustered histone 7	Q99525	98	297	2	0.00673401	Squamous cell carcinoma, keratinizing, NOS
H2B clustered histone 13	Q99880	126	381	1	0.00262467	Squamous cell carcinoma, keratinizing, NOS
H2B clustered histone 3	P33778	126	381	1	0.00262467	Squamous cell carcinoma, keratinizing, NOS
H3.Y histone 1	P0DPK2	136	411	0	0	Squamous cell carcinoma, keratinizing, NOS
H2A.P histone	O75409	117	354	1	0.00282486	Squamous cell carcinoma, keratinizing, NOS
H2A.B variant histone 1	P0C5Y9	115	348	0	0	Squamous cell carcinoma, keratinizing, NOS
H4 clustered histone 1	P62805	103	4368	7	0.00160256	Squamous cell carcinoma, keratinizing, NOS
macroH2A.1 histone	O75367	369	1318	1	0.000758725	Squamous cell carcinoma, keratinizing, NOS
H2A.B variant histone 2	P0C5Z0	115	696	0	0	Squamous cell carcinoma, keratinizing, NOS
H3.4 histone	Q16695	136	411	1	0.00243309	Squamous cell carcinoma, keratinizing, NOS
H2B clustered histone 9	Q93079	126	381	0	0	Squamous cell carcinoma, keratinizing, NOS
H2A clustered histone 4	P04908	130	786	2	0.00254453	Squamous cell carcinoma, keratinizing, NOS
macroH2A.2 histone	Q9P0M6	372	1119	0	0	Squamous cell carcinoma, keratinizing, NOS
H2B clustered histone 17	P23527	126	381	0	0	Squamous cell carcinoma, keratinizing, NOS
H2B clustered histone 21	Q16778	126	381	2	0.00524934	Squamous cell carcinoma, keratinizing, NOS
H2B.W histone 1	Q7Z2G1	175	444	0	0	Squamous cell carcinoma, keratinizing, NOS
H2A clustered histone 21	Q8IUE6	130	393	0	0	Metaplastic carcinoma, NOS
Histone H2B type F-S	P57053	126	467	0	0	Metaplastic carcinoma, NOS
H2A clustered histone 18	Q6FI13	130	786	0	0	Metaplastic carcinoma, NOS
H2A.Z variant histone 1	P0C0S5	128	387	0	0	Metaplastic carcinoma, NOS
H2A.X variant histone	P16104	143	432	0	0	Metaplastic carcinoma, NOS
H2B clustered histone 10	P62807	126	1905	0	0	Metaplastic carcinoma, NOS
Histone H2A-like 3	A0A3B3IU63	148	447	0	0	Metaplastic carcinoma, NOS
Histone H2B type 3-B	Q8N257	126	381	0	0	Metaplastic carcinoma, NOS
H2A clustered histone 6	Q93077	130	393	0	0	Metaplastic carcinoma, NOS
H1.8 linker histone	Q8IZA3	346	1366	0	0	Metaplastic carcinoma, NOS
H2B clustered histone 14	Q99879	126	381	0	0	Metaplastic carcinoma, NOS
H3.Y histone 2	P0DPK5	147	444	0	0	Metaplastic carcinoma, NOS
Histone H2A type 3	Q7L7L0	130	393	0	0	Metaplastic carcinoma, NOS
H2A clustered histone 7	P20671	130	393	0	0	Metaplastic carcinoma, NOS
Histone H3-7	Q5TEC6	136	411	0	0	Metaplastic carcinoma, NOS
H1.7 linker histone	Q75WM6	255	768	1	0.00130208	Metaplastic carcinoma, NOS
H1.5 linker histone, cluster member	P16401	226	681	0	0	Metaplastic carcinoma, NOS
H1.4 linker histone, cluster member	P10412	219	660	0	0	Metaplastic carcinoma, NOS
H2A clustered histone 11	P0C0S8	130	1965	0	0	Metaplastic carcinoma, NOS
H3.3 histone A	P84243	136	822	0	0	Metaplastic carcinoma, NOS
H2B clustered histone 1	Q96A08	127	384	0	0	Metaplastic carcinoma, NOS
H3.5 histone	Q6NXT2	135	408	0	0	Metaplastic carcinoma, NOS
H3 clustered histone 1	P68431	136	4110	0	0	Metaplastic carcinoma, NOS
H1.2 linker histone, cluster member	P16403	213	642	0	0	Metaplastic carcinoma, NOS
H3 clustered histone 13	Q71DI3	136	1233	1	0.00081103	Metaplastic carcinoma, NOS
H1.3 linker histone, cluster member	P16402	221	666	0	0	Metaplastic carcinoma, NOS
H2B clustered histone 12	O60814	126	381	0	0	Metaplastic carcinoma, NOS
H1.1 linker histone, cluster member	Q02539	215	648	0	0	Metaplastic carcinoma, NOS
H2A clustered histone 12	Q96KK5	128	387	0	0	Metaplastic carcinoma, NOS
H2A clustered histone 20	Q16777	129	390	0	0	Metaplastic carcinoma, NOS
H2B clustered histone 18	Q5QNW6	126	786	0	0	Metaplastic carcinoma, NOS
H2A clustered histone 1	Q96QV6	131	396	0	0	Metaplastic carcinoma, NOS
H1.6 linker histone, cluster member	P22492	207	624	0	0	Metaplastic carcinoma, NOS
H2B.W histone 2	P0C1H6	154	447	0	0	Metaplastic carcinoma, NOS
centromere protein A	P49450	140	423	0	0	Metaplastic carcinoma, NOS
H1.10 linker histone	Q92522	213	642	0	0	Metaplastic carcinoma, NOS
Histone H2B type 2-K1	A0A2R8Y619	122	369	0	0	Metaplastic carcinoma, NOS
H2B clustered histone 11	P06899	126	381	0	0	Metaplastic carcinoma, NOS
H2A.Z variant histone 2	Q71UI9	128	413	0	0	Metaplastic carcinoma, NOS
H1.0 linker histone	P07305	194	585	0	0	Metaplastic carcinoma, NOS
H2B clustered histone 15	Q99877	126	381	0	0	Metaplastic carcinoma, NOS
H2A clustered histone 14	Q99878	128	387	0	0	Metaplastic carcinoma, NOS
H2A.J histone	Q9BTM1	129	390	0	0	Metaplastic carcinoma, NOS
H2B clustered histone 5	P58876	126	381	0	0	Metaplastic carcinoma, NOS
H4 clustered histone 7	Q99525	98	297	0	0	Metaplastic carcinoma, NOS
H2B clustered histone 13	Q99880	126	381	0	0	Metaplastic carcinoma, NOS
H2B clustered histone 3	P33778	126	381	0	0	Metaplastic carcinoma, NOS
H3.Y histone 1	P0DPK2	136	411	0	0	Metaplastic carcinoma, NOS
H2A.P histone	O75409	117	354	0	0	Metaplastic carcinoma, NOS
H2A.B variant histone 1	P0C5Y9	115	348	0	0	Metaplastic carcinoma, NOS
H4 clustered histone 1	P62805	103	4368	0	0	Metaplastic carcinoma, NOS
macroH2A.1 histone	O75367	369	1318	0	0	Metaplastic carcinoma, NOS
H2A.B variant histone 2	P0C5Z0	115	696	0	0	Metaplastic carcinoma, NOS
H3.4 histone	Q16695	136	411	0	0	Metaplastic carcinoma, NOS
H2B clustered histone 9	Q93079	126	381	0	0	Metaplastic carcinoma, NOS
H2A clustered histone 4	P04908	130	786	0	0	Metaplastic carcinoma, NOS
macroH2A.2 histone	Q9P0M6	372	1119	1	0.000893655	Metaplastic carcinoma, NOS
H2B clustered histone 17	P23527	126	381	0	0	Metaplastic carcinoma, NOS
H2B clustered histone 21	Q16778	126	381	1	0.00262467	Metaplastic carcinoma, NOS
H2B.W histone 1	Q7Z2G1	175	444	0	0	Metaplastic carcinoma, NOS
H2A clustered histone 21	Q8IUE6	130	393	0	0	Papillary carcinoma, follicular variant
Histone H2B type F-S	P57053	126	467	0	0	Papillary carcinoma, follicular variant
H2A clustered histone 18	Q6FI13	130	786	0	0	Papillary carcinoma, follicular variant
H2A.Z variant histone 1	P0C0S5	128	387	0	0	Papillary carcinoma, follicular variant
H2A.X variant histone	P16104	143	432	0	0	Papillary carcinoma, follicular variant
H2B clustered histone 10	P62807	126	1905	0	0	Papillary carcinoma, follicular variant
Histone H2A-like 3	A0A3B3IU63	148	447	0	0	Papillary carcinoma, follicular variant
Histone H2B type 3-B	Q8N257	126	381	0	0	Papillary carcinoma, follicular variant
H2A clustered histone 6	Q93077	130	393	0	0	Papillary carcinoma, follicular variant
H1.8 linker histone	Q8IZA3	346	1366	0	0	Papillary carcinoma, follicular variant
H2B clustered histone 14	Q99879	126	381	0	0	Papillary carcinoma, follicular variant
H3.Y histone 2	P0DPK5	147	444	0	0	Papillary carcinoma, follicular variant
Histone H2A type 3	Q7L7L0	130	393	0	0	Papillary carcinoma, follicular variant
H2A clustered histone 7	P20671	130	393	0	0	Papillary carcinoma, follicular variant
Histone H3-7	Q5TEC6	136	411	0	0	Papillary carcinoma, follicular variant
H1.7 linker histone	Q75WM6	255	768	0	0	Papillary carcinoma, follicular variant
H1.5 linker histone, cluster member	P16401	226	681	0	0	Papillary carcinoma, follicular variant
H1.4 linker histone, cluster member	P10412	219	660	1	0.00151515	Papillary carcinoma, follicular variant
H2A clustered histone 11	P0C0S8	130	1965	0	0	Papillary carcinoma, follicular variant
H3.3 histone A	P84243	136	822	0	0	Papillary carcinoma, follicular variant
H2B clustered histone 1	Q96A08	127	384	0	0	Papillary carcinoma, follicular variant
H3.5 histone	Q6NXT2	135	408	0	0	Papillary carcinoma, follicular variant
H3 clustered histone 1	P68431	136	4110	0	0	Papillary carcinoma, follicular variant
H1.2 linker histone, cluster member	P16403	213	642	0	0	Papillary carcinoma, follicular variant
H3 clustered histone 13	Q71DI3	136	1233	2	0.00162206	Papillary carcinoma, follicular variant
H1.3 linker histone, cluster member	P16402	221	666	0	0	Papillary carcinoma, follicular variant
H2B clustered histone 12	O60814	126	381	0	0	Papillary carcinoma, follicular variant
H1.1 linker histone, cluster member	Q02539	215	648	0	0	Papillary carcinoma, follicular variant
H2A clustered histone 12	Q96KK5	128	387	0	0	Papillary carcinoma, follicular variant
H2A clustered histone 20	Q16777	129	390	0	0	Papillary carcinoma, follicular variant
H2B clustered histone 18	Q5QNW6	126	786	0	0	Papillary carcinoma, follicular variant
H2A clustered histone 1	Q96QV6	131	396	0	0	Papillary carcinoma, follicular variant
H1.6 linker histone, cluster member	P22492	207	624	0	0	Papillary carcinoma, follicular variant
H2B.W histone 2	P0C1H6	154	447	0	0	Papillary carcinoma, follicular variant
centromere protein A	P49450	140	423	0	0	Papillary carcinoma, follicular variant
H1.10 linker histone	Q92522	213	642	0	0	Papillary carcinoma, follicular variant
Histone H2B type 2-K1	A0A2R8Y619	122	369	0	0	Papillary carcinoma, follicular variant
H2B clustered histone 11	P06899	126	381	0	0	Papillary carcinoma, follicular variant
H2A.Z variant histone 2	Q71UI9	128	413	0	0	Papillary carcinoma, follicular variant
H1.0 linker histone	P07305	194	585	0	0	Papillary carcinoma, follicular variant
H2B clustered histone 15	Q99877	126	381	0	0	Papillary carcinoma, follicular variant
H2A clustered histone 14	Q99878	128	387	0	0	Papillary carcinoma, follicular variant
H2A.J histone	Q9BTM1	129	390	0	0	Papillary carcinoma, follicular variant
H2B clustered histone 5	P58876	126	381	0	0	Papillary carcinoma, follicular variant
H4 clustered histone 7	Q99525	98	297	0	0	Papillary carcinoma, follicular variant
H2B clustered histone 13	Q99880	126	381	0	0	Papillary carcinoma, follicular variant
H2B clustered histone 3	P33778	126	381	0	0	Papillary carcinoma, follicular variant
H3.Y histone 1	P0DPK2	136	411	0	0	Papillary carcinoma, follicular variant
H2A.P histone	O75409	117	354	0	0	Papillary carcinoma, follicular variant
H2A.B variant histone 1	P0C5Y9	115	348	0	0	Papillary carcinoma, follicular variant
H4 clustered histone 1	P62805	103	4368	1	0.000228938	Papillary carcinoma, follicular variant
macroH2A.1 histone	O75367	369	1318	0	0	Papillary carcinoma, follicular variant
H2A.B variant histone 2	P0C5Z0	115	696	0	0	Papillary carcinoma, follicular variant
H3.4 histone	Q16695	136	411	0	0	Papillary carcinoma, follicular variant
H2B clustered histone 9	Q93079	126	381	0	0	Papillary carcinoma, follicular variant
H2A clustered histone 4	P04908	130	786	0	0	Papillary carcinoma, follicular variant
macroH2A.2 histone	Q9P0M6	372	1119	0	0	Papillary carcinoma, follicular variant
H2B clustered histone 17	P23527	126	381	0	0	Papillary carcinoma, follicular variant
H2B clustered histone 21	Q16778	126	381	0	0	Papillary carcinoma, follicular variant
H2B.W histone 1	Q7Z2G1	175	444	0	0	Papillary carcinoma, follicular variant
H2A clustered histone 21	Q8IUE6	130	393	0	0	Leiomyosarcoma, NOS
Histone H2B type F-S	P57053	126	467	0	0	Leiomyosarcoma, NOS
H2A clustered histone 18	Q6FI13	130	786	0	0	Leiomyosarcoma, NOS
H2A.Z variant histone 1	P0C0S5	128	387	0	0	Leiomyosarcoma, NOS
H2A.X variant histone	P16104	143	432	1	0.00231481	Leiomyosarcoma, NOS
H2B clustered histone 10	P62807	126	1905	0	0	Leiomyosarcoma, NOS
Histone H2A-like 3	A0A3B3IU63	148	447	0	0	Leiomyosarcoma, NOS
Histone H2B type 3-B	Q8N257	126	381	0	0	Leiomyosarcoma, NOS
H2A clustered histone 6	Q93077	130	393	0	0	Leiomyosarcoma, NOS
H1.8 linker histone	Q8IZA3	346	1366	1	0.000732064	Leiomyosarcoma, NOS
H2B clustered histone 14	Q99879	126	381	0	0	Leiomyosarcoma, NOS
H3.Y histone 2	P0DPK5	147	444	0	0	Leiomyosarcoma, NOS
Histone H2A type 3	Q7L7L0	130	393	0	0	Leiomyosarcoma, NOS
H2A clustered histone 7	P20671	130	393	0	0	Leiomyosarcoma, NOS
Histone H3-7	Q5TEC6	136	411	0	0	Leiomyosarcoma, NOS
H1.7 linker histone	Q75WM6	255	768	0	0	Leiomyosarcoma, NOS
H1.5 linker histone, cluster member	P16401	226	681	0	0	Leiomyosarcoma, NOS
H1.4 linker histone, cluster member	P10412	219	660	0	0	Leiomyosarcoma, NOS
H2A clustered histone 11	P0C0S8	130	1965	1	0.000508906	Leiomyosarcoma, NOS
H3.3 histone A	P84243	136	822	0	0	Leiomyosarcoma, NOS
H2B clustered histone 1	Q96A08	127	384	0	0	Leiomyosarcoma, NOS
H3.5 histone	Q6NXT2	135	408	0	0	Leiomyosarcoma, NOS
H3 clustered histone 1	P68431	136	4110	1	0.000243309	Leiomyosarcoma, NOS
H1.2 linker histone, cluster member	P16403	213	642	1	0.00155763	Leiomyosarcoma, NOS
H3 clustered histone 13	Q71DI3	136	1233	0	0	Leiomyosarcoma, NOS
H1.3 linker histone, cluster member	P16402	221	666	0	0	Leiomyosarcoma, NOS
H2B clustered histone 12	O60814	126	381	0	0	Leiomyosarcoma, NOS
H1.1 linker histone, cluster member	Q02539	215	648	0	0	Leiomyosarcoma, NOS
H2A clustered histone 12	Q96KK5	128	387	0	0	Leiomyosarcoma, NOS
H2A clustered histone 20	Q16777	129	390	1	0.0025641	Leiomyosarcoma, NOS
H2B clustered histone 18	Q5QNW6	126	786	0	0	Leiomyosarcoma, NOS
H2A clustered histone 1	Q96QV6	131	396	0	0	Leiomyosarcoma, NOS
H1.6 linker histone, cluster member	P22492	207	624	0	0	Leiomyosarcoma, NOS
H2B.W histone 2	P0C1H6	154	447	0	0	Leiomyosarcoma, NOS
centromere protein A	P49450	140	423	0	0	Leiomyosarcoma, NOS
H1.10 linker histone	Q92522	213	642	0	0	Leiomyosarcoma, NOS
Histone H2B type 2-K1	A0A2R8Y619	122	369	0	0	Leiomyosarcoma, NOS
H2B clustered histone 11	P06899	126	381	0	0	Leiomyosarcoma, NOS
H2A.Z variant histone 2	Q71UI9	128	413	0	0	Leiomyosarcoma, NOS
H1.0 linker histone	P07305	194	585	0	0	Leiomyosarcoma, NOS
H2B clustered histone 15	Q99877	126	381	0	0	Leiomyosarcoma, NOS
H2A clustered histone 14	Q99878	128	387	0	0	Leiomyosarcoma, NOS
H2A.J histone	Q9BTM1	129	390	0	0	Leiomyosarcoma, NOS
H2B clustered histone 5	P58876	126	381	0	0	Leiomyosarcoma, NOS
H4 clustered histone 7	Q99525	98	297	0	0	Leiomyosarcoma, NOS
H2B clustered histone 13	Q99880	126	381	0	0	Leiomyosarcoma, NOS
H2B clustered histone 3	P33778	126	381	0	0	Leiomyosarcoma, NOS
H3.Y histone 1	P0DPK2	136	411	0	0	Leiomyosarcoma, NOS
H2A.P histone	O75409	117	354	0	0	Leiomyosarcoma, NOS
H2A.B variant histone 1	P0C5Y9	115	348	0	0	Leiomyosarcoma, NOS
H4 clustered histone 1	P62805	103	4368	2	0.000457875	Leiomyosarcoma, NOS
macroH2A.1 histone	O75367	369	1318	1	0.000758725	Leiomyosarcoma, NOS
H2A.B variant histone 2	P0C5Z0	115	696	0	0	Leiomyosarcoma, NOS
H3.4 histone	Q16695	136	411	0	0	Leiomyosarcoma, NOS
H2B clustered histone 9	Q93079	126	381	0	0	Leiomyosarcoma, NOS
H2A clustered histone 4	P04908	130	786	0	0	Leiomyosarcoma, NOS
macroH2A.2 histone	Q9P0M6	372	1119	0	0	Leiomyosarcoma, NOS
H2B clustered histone 17	P23527	126	381	0	0	Leiomyosarcoma, NOS
H2B clustered histone 21	Q16778	126	381	0	0	Leiomyosarcoma, NOS
H2B.W histone 1	Q7Z2G1	175	444	0	0	Leiomyosarcoma, NOS
H2A clustered histone 21	Q8IUE6	130	393	1	0.00254453	Mucinous adenocarcinoma
Histone H2B type F-S	P57053	126	467	0	0	Mucinous adenocarcinoma
H2A clustered histone 18	Q6FI13	130	786	0	0	Mucinous adenocarcinoma
H2A.Z variant histone 1	P0C0S5	128	387	1	0.00258398	Mucinous adenocarcinoma
H2A.X variant histone	P16104	143	432	0	0	Mucinous adenocarcinoma
H2B clustered histone 10	P62807	126	1905	6	0.00314961	Mucinous adenocarcinoma
Histone H2A-like 3	A0A3B3IU63	148	447	0	0	Mucinous adenocarcinoma
Histone H2B type 3-B	Q8N257	126	381	0	0	Mucinous adenocarcinoma
H2A clustered histone 6	Q93077	130	393	1	0.00254453	Mucinous adenocarcinoma
H1.8 linker histone	Q8IZA3	346	1366	2	0.00146413	Mucinous adenocarcinoma
H2B clustered histone 14	Q99879	126	381	3	0.00787402	Mucinous adenocarcinoma
H3.Y histone 2	P0DPK5	147	444	0	0	Mucinous adenocarcinoma
Histone H2A type 3	Q7L7L0	130	393	0	0	Mucinous adenocarcinoma
H2A clustered histone 7	P20671	130	393	0	0	Mucinous adenocarcinoma
Histone H3-7	Q5TEC6	136	411	2	0.00486618	Mucinous adenocarcinoma
H1.7 linker histone	Q75WM6	255	768	2	0.00260417	Mucinous adenocarcinoma
H1.5 linker histone, cluster member	P16401	226	681	5	0.00734214	Mucinous adenocarcinoma
H1.4 linker histone, cluster member	P10412	219	660	2	0.0030303	Mucinous adenocarcinoma
H2A clustered histone 11	P0C0S8	130	1965	7	0.00356234	Mucinous adenocarcinoma
H3.3 histone A	P84243	136	822	1	0.00121655	Mucinous adenocarcinoma
H2B clustered histone 1	Q96A08	127	384	0	0	Mucinous adenocarcinoma
H3.5 histone	Q6NXT2	135	408	1	0.00245098	Mucinous adenocarcinoma
H3 clustered histone 1	P68431	136	4110	7	0.00170316	Mucinous adenocarcinoma
H1.2 linker histone, cluster member	P16403	213	642	3	0.0046729	Mucinous adenocarcinoma
H3 clustered histone 13	Q71DI3	136	1233	0	0	Mucinous adenocarcinoma
H1.3 linker histone, cluster member	P16402	221	666	4	0.00600601	Mucinous adenocarcinoma
H2B clustered histone 12	O60814	126	381	0	0	Mucinous adenocarcinoma
H1.1 linker histone, cluster member	Q02539	215	648	5	0.00771605	Mucinous adenocarcinoma
H2A clustered histone 12	Q96KK5	128	387	0	0	Mucinous adenocarcinoma
H2A clustered histone 20	Q16777	129	390	3	0.00769231	Mucinous adenocarcinoma
H2B clustered histone 18	Q5QNW6	126	786	1	0.00127226	Mucinous adenocarcinoma
H2A clustered histone 1	Q96QV6	131	396	2	0.00505051	Mucinous adenocarcinoma
H1.6 linker histone, cluster member	P22492	207	624	1	0.00160256	Mucinous adenocarcinoma
H2B.W histone 2	P0C1H6	154	447	0	0	Mucinous adenocarcinoma
centromere protein A	P49450	140	423	1	0.00236407	Mucinous adenocarcinoma
H1.10 linker histone	Q92522	213	642	0	0	Mucinous adenocarcinoma
Histone H2B type 2-K1	A0A2R8Y619	122	369	0	0	Mucinous adenocarcinoma
H2B clustered histone 11	P06899	126	381	1	0.00262467	Mucinous adenocarcinoma
H2A.Z variant histone 2	Q71UI9	128	413	0	0	Mucinous adenocarcinoma
H1.0 linker histone	P07305	194	585	1	0.0017094	Mucinous adenocarcinoma
H2B clustered histone 15	Q99877	126	381	0	0	Mucinous adenocarcinoma
H2A clustered histone 14	Q99878	128	387	0	0	Mucinous adenocarcinoma
H2A.J histone	Q9BTM1	129	390	1	0.0025641	Mucinous adenocarcinoma
H2B clustered histone 5	P58876	126	381	1	0.00262467	Mucinous adenocarcinoma
H4 clustered histone 7	Q99525	98	297	2	0.00673401	Mucinous adenocarcinoma
H2B clustered histone 13	Q99880	126	381	1	0.00262467	Mucinous adenocarcinoma
H2B clustered histone 3	P33778	126	381	3	0.00787402	Mucinous adenocarcinoma
H3.Y histone 1	P0DPK2	136	411	0	0	Mucinous adenocarcinoma
H2A.P histone	O75409	117	354	0	0	Mucinous adenocarcinoma
H2A.B variant histone 1	P0C5Y9	115	348	0	0	Mucinous adenocarcinoma
H4 clustered histone 1	P62805	103	4368	12	0.00274725	Mucinous adenocarcinoma
macroH2A.1 histone	O75367	369	1318	3	0.00227618	Mucinous adenocarcinoma
H2A.B variant histone 2	P0C5Z0	115	696	0	0	Mucinous adenocarcinoma
H3.4 histone	Q16695	136	411	0	0	Mucinous adenocarcinoma
H2B clustered histone 9	Q93079	126	381	0	0	Mucinous adenocarcinoma
H2A clustered histone 4	P04908	130	786	3	0.00381679	Mucinous adenocarcinoma
macroH2A.2 histone	Q9P0M6	372	1119	2	0.00178731	Mucinous adenocarcinoma
H2B clustered histone 17	P23527	126	381	0	0	Mucinous adenocarcinoma
H2B clustered histone 21	Q16778	126	381	2	0.00524934	Mucinous adenocarcinoma
H2B.W histone 1	Q7Z2G1	175	444	0	0	Mucinous adenocarcinoma
H2A clustered histone 21	Q8IUE6	130	393	1	0.00254453	Infiltrating duct carcinoma, NOS
Histone H2B type F-S	P57053	126	467	0	0	Infiltrating duct carcinoma, NOS
H2A clustered histone 18	Q6FI13	130	786	0	0	Infiltrating duct carcinoma, NOS
H2A.Z variant histone 1	P0C0S5	128	387	7	0.0180879	Infiltrating duct carcinoma, NOS
H2A.X variant histone	P16104	143	432	1	0.00231481	Infiltrating duct carcinoma, NOS
H2B clustered histone 10	P62807	126	1905	27	0.0141732	Infiltrating duct carcinoma, NOS
Histone H2A-like 3	A0A3B3IU63	148	447	0	0	Infiltrating duct carcinoma, NOS
Histone H2B type 3-B	Q8N257	126	381	4	0.0104987	Infiltrating duct carcinoma, NOS
H2A clustered histone 6	Q93077	130	393	3	0.00763359	Infiltrating duct carcinoma, NOS
H1.8 linker histone	Q8IZA3	346	1366	2	0.00146413	Infiltrating duct carcinoma, NOS
H2B clustered histone 14	Q99879	126	381	2	0.00524934	Infiltrating duct carcinoma, NOS
H3.Y histone 2	P0DPK5	147	444	0	0	Infiltrating duct carcinoma, NOS
Histone H2A type 3	Q7L7L0	130	393	3	0.00763359	Infiltrating duct carcinoma, NOS
H2A clustered histone 7	P20671	130	393	0	0	Infiltrating duct carcinoma, NOS
Histone H3-7	Q5TEC6	136	411	1	0.00243309	Infiltrating duct carcinoma, NOS
H1.7 linker histone	Q75WM6	255	768	3	0.00390625	Infiltrating duct carcinoma, NOS
H1.5 linker histone, cluster member	P16401	226	681	4	0.00587372	Infiltrating duct carcinoma, NOS
H1.4 linker histone, cluster member	P10412	219	660	6	0.00909091	Infiltrating duct carcinoma, NOS
H2A clustered histone 11	P0C0S8	130	1965	19	0.00966921	Infiltrating duct carcinoma, NOS
H3.3 histone A	P84243	136	822	4	0.00486618	Infiltrating duct carcinoma, NOS
H2B clustered histone 1	Q96A08	127	384	1	0.00260417	Infiltrating duct carcinoma, NOS
H3.5 histone	Q6NXT2	135	408	1	0.00245098	Infiltrating duct carcinoma, NOS
H3 clustered histone 1	P68431	136	4110	47	0.0114355	Infiltrating duct carcinoma, NOS
H1.2 linker histone, cluster member	P16403	213	642	6	0.00934579	Infiltrating duct carcinoma, NOS
H3 clustered histone 13	Q71DI3	136	1233	6	0.00486618	Infiltrating duct carcinoma, NOS
H1.3 linker histone, cluster member	P16402	221	666	6	0.00900901	Infiltrating duct carcinoma, NOS
H2B clustered histone 12	O60814	126	381	5	0.0131234	Infiltrating duct carcinoma, NOS
H1.1 linker histone, cluster member	Q02539	215	648	1	0.00154321	Infiltrating duct carcinoma, NOS
H2A clustered histone 12	Q96KK5	128	387	5	0.0129199	Infiltrating duct carcinoma, NOS
H2A clustered histone 20	Q16777	129	390	12	0.0307692	Infiltrating duct carcinoma, NOS
H2B clustered histone 18	Q5QNW6	126	786	3	0.00381679	Infiltrating duct carcinoma, NOS
H2A clustered histone 1	Q96QV6	131	396	3	0.00757576	Infiltrating duct carcinoma, NOS
H1.6 linker histone, cluster member	P22492	207	624	5	0.00801282	Infiltrating duct carcinoma, NOS
H2B.W histone 2	P0C1H6	154	447	0	0	Infiltrating duct carcinoma, NOS
centromere protein A	P49450	140	423	0	0	Infiltrating duct carcinoma, NOS
H1.10 linker histone	Q92522	213	642	0	0	Infiltrating duct carcinoma, NOS
Histone H2B type 2-K1	A0A2R8Y619	122	369	0	0	Infiltrating duct carcinoma, NOS
H2B clustered histone 11	P06899	126	381	5	0.0131234	Infiltrating duct carcinoma, NOS
H2A.Z variant histone 2	Q71UI9	128	413	0	0	Infiltrating duct carcinoma, NOS
H1.0 linker histone	P07305	194	585	0	0	Infiltrating duct carcinoma, NOS
H2B clustered histone 15	Q99877	126	381	3	0.00787402	Infiltrating duct carcinoma, NOS
H2A clustered histone 14	Q99878	128	387	3	0.00775194	Infiltrating duct carcinoma, NOS
H2A.J histone	Q9BTM1	129	390	0	0	Infiltrating duct carcinoma, NOS
H2B clustered histone 5	P58876	126	381	2	0.00524934	Infiltrating duct carcinoma, NOS
H4 clustered histone 7	Q99525	98	297	3	0.010101	Infiltrating duct carcinoma, NOS
H2B clustered histone 13	Q99880	126	381	3	0.00787402	Infiltrating duct carcinoma, NOS
H2B clustered histone 3	P33778	126	381	5	0.0131234	Infiltrating duct carcinoma, NOS
H3.Y histone 1	P0DPK2	136	411	0	0	Infiltrating duct carcinoma, NOS
H2A.P histone	O75409	117	354	3	0.00847458	Infiltrating duct carcinoma, NOS
H2A.B variant histone 1	P0C5Y9	115	348	1	0.00287356	Infiltrating duct carcinoma, NOS
H4 clustered histone 1	P62805	103	4368	32	0.00732601	Infiltrating duct carcinoma, NOS
macroH2A.1 histone	O75367	369	1318	4	0.0030349	Infiltrating duct carcinoma, NOS
H2A.B variant histone 2	P0C5Z0	115	696	0	0	Infiltrating duct carcinoma, NOS
H3.4 histone	Q16695	136	411	3	0.00729927	Infiltrating duct carcinoma, NOS
H2B clustered histone 9	Q93079	126	381	6	0.015748	Infiltrating duct carcinoma, NOS
H2A clustered histone 4	P04908	130	786	9	0.0114504	Infiltrating duct carcinoma, NOS
macroH2A.2 histone	Q9P0M6	372	1119	3	0.00268097	Infiltrating duct carcinoma, NOS
H2B clustered histone 17	P23527	126	381	3	0.00787402	Infiltrating duct carcinoma, NOS
H2B clustered histone 21	Q16778	126	381	7	0.0183727	Infiltrating duct carcinoma, NOS
H2B.W histone 1	Q7Z2G1	175	444	5	0.0112613	Infiltrating duct carcinoma, NOS
H2A clustered histone 21	Q8IUE6	130	393	0	0	Cholangiocarcinoma
Histone H2B type F-S	P57053	126	467	0	0	Cholangiocarcinoma
H2A clustered histone 18	Q6FI13	130	786	0	0	Cholangiocarcinoma
H2A.Z variant histone 1	P0C0S5	128	387	0	0	Cholangiocarcinoma
H2A.X variant histone	P16104	143	432	0	0	Cholangiocarcinoma
H2B clustered histone 10	P62807	126	1905	0	0	Cholangiocarcinoma
Histone H2A-like 3	A0A3B3IU63	148	447	0	0	Cholangiocarcinoma
Histone H2B type 3-B	Q8N257	126	381	0	0	Cholangiocarcinoma
H2A clustered histone 6	Q93077	130	393	0	0	Cholangiocarcinoma
H1.8 linker histone	Q8IZA3	346	1366	0	0	Cholangiocarcinoma
H2B clustered histone 14	Q99879	126	381	0	0	Cholangiocarcinoma
H3.Y histone 2	P0DPK5	147	444	0	0	Cholangiocarcinoma
Histone H2A type 3	Q7L7L0	130	393	0	0	Cholangiocarcinoma
H2A clustered histone 7	P20671	130	393	0	0	Cholangiocarcinoma
Histone H3-7	Q5TEC6	136	411	0	0	Cholangiocarcinoma
H1.7 linker histone	Q75WM6	255	768	0	0	Cholangiocarcinoma
H1.5 linker histone, cluster member	P16401	226	681	0	0	Cholangiocarcinoma
H1.4 linker histone, cluster member	P10412	219	660	1	0.00151515	Cholangiocarcinoma
H2A clustered histone 11	P0C0S8	130	1965	1	0.000508906	Cholangiocarcinoma
H3.3 histone A	P84243	136	822	0	0	Cholangiocarcinoma
H2B clustered histone 1	Q96A08	127	384	0	0	Cholangiocarcinoma
H3.5 histone	Q6NXT2	135	408	0	0	Cholangiocarcinoma
H3 clustered histone 1	P68431	136	4110	1	0.000243309	Cholangiocarcinoma
H1.2 linker histone, cluster member	P16403	213	642	0	0	Cholangiocarcinoma
H3 clustered histone 13	Q71DI3	136	1233	0	0	Cholangiocarcinoma
H1.3 linker histone, cluster member	P16402	221	666	0	0	Cholangiocarcinoma
H2B clustered histone 12	O60814	126	381	0	0	Cholangiocarcinoma
H1.1 linker histone, cluster member	Q02539	215	648	0	0	Cholangiocarcinoma
H2A clustered histone 12	Q96KK5	128	387	0	0	Cholangiocarcinoma
H2A clustered histone 20	Q16777	129	390	0	0	Cholangiocarcinoma
H2B clustered histone 18	Q5QNW6	126	786	0	0	Cholangiocarcinoma
H2A clustered histone 1	Q96QV6	131	396	0	0	Cholangiocarcinoma
H1.6 linker histone, cluster member	P22492	207	624	1	0.00160256	Cholangiocarcinoma
H2B.W histone 2	P0C1H6	154	447	0	0	Cholangiocarcinoma
centromere protein A	P49450	140	423	0	0	Cholangiocarcinoma
H1.10 linker histone	Q92522	213	642	0	0	Cholangiocarcinoma
Histone H2B type 2-K1	A0A2R8Y619	122	369	0	0	Cholangiocarcinoma
H2B clustered histone 11	P06899	126	381	0	0	Cholangiocarcinoma
H2A.Z variant histone 2	Q71UI9	128	413	0	0	Cholangiocarcinoma
H1.0 linker histone	P07305	194	585	0	0	Cholangiocarcinoma
H2B clustered histone 15	Q99877	126	381	0	0	Cholangiocarcinoma
H2A clustered histone 14	Q99878	128	387	0	0	Cholangiocarcinoma
H2A.J histone	Q9BTM1	129	390	0	0	Cholangiocarcinoma
H2B clustered histone 5	P58876	126	381	1	0.00262467	Cholangiocarcinoma
H4 clustered histone 7	Q99525	98	297	0	0	Cholangiocarcinoma
H2B clustered histone 13	Q99880	126	381	0	0	Cholangiocarcinoma
H2B clustered histone 3	P33778	126	381	0	0	Cholangiocarcinoma
H3.Y histone 1	P0DPK2	136	411	0	0	Cholangiocarcinoma
H2A.P histone	O75409	117	354	0	0	Cholangiocarcinoma
H2A.B variant histone 1	P0C5Y9	115	348	0	0	Cholangiocarcinoma
H4 clustered histone 1	P62805	103	4368	0	0	Cholangiocarcinoma
macroH2A.1 histone	O75367	369	1318	0	0	Cholangiocarcinoma
H2A.B variant histone 2	P0C5Z0	115	696	0	0	Cholangiocarcinoma
H3.4 histone	Q16695	136	411	0	0	Cholangiocarcinoma
H2B clustered histone 9	Q93079	126	381	1	0.00262467	Cholangiocarcinoma
H2A clustered histone 4	P04908	130	786	0	0	Cholangiocarcinoma
macroH2A.2 histone	Q9P0M6	372	1119	0	0	Cholangiocarcinoma
H2B clustered histone 17	P23527	126	381	0	0	Cholangiocarcinoma
H2B clustered histone 21	Q16778	126	381	0	0	Cholangiocarcinoma
H2B.W histone 1	Q7Z2G1	175	444	0	0	Cholangiocarcinoma
H2A clustered histone 21	Q8IUE6	130	393	0	0	Fibromyxosarcoma
Histone H2B type F-S	P57053	126	467	0	0	Fibromyxosarcoma
H2A clustered histone 18	Q6FI13	130	786	0	0	Fibromyxosarcoma
H2A.Z variant histone 1	P0C0S5	128	387	0	0	Fibromyxosarcoma
H2A.X variant histone	P16104	143	432	0	0	Fibromyxosarcoma
H2B clustered histone 10	P62807	126	1905	0	0	Fibromyxosarcoma
Histone H2A-like 3	A0A3B3IU63	148	447	0	0	Fibromyxosarcoma
Histone H2B type 3-B	Q8N257	126	381	0	0	Fibromyxosarcoma
H2A clustered histone 6	Q93077	130	393	0	0	Fibromyxosarcoma
H1.8 linker histone	Q8IZA3	346	1366	0	0	Fibromyxosarcoma
H2B clustered histone 14	Q99879	126	381	0	0	Fibromyxosarcoma
H3.Y histone 2	P0DPK5	147	444	0	0	Fibromyxosarcoma
Histone H2A type 3	Q7L7L0	130	393	0	0	Fibromyxosarcoma
H2A clustered histone 7	P20671	130	393	0	0	Fibromyxosarcoma
Histone H3-7	Q5TEC6	136	411	0	0	Fibromyxosarcoma
H1.7 linker histone	Q75WM6	255	768	0	0	Fibromyxosarcoma
H1.5 linker histone, cluster member	P16401	226	681	0	0	Fibromyxosarcoma
H1.4 linker histone, cluster member	P10412	219	660	0	0	Fibromyxosarcoma
H2A clustered histone 11	P0C0S8	130	1965	0	0	Fibromyxosarcoma
H3.3 histone A	P84243	136	822	0	0	Fibromyxosarcoma
H2B clustered histone 1	Q96A08	127	384	0	0	Fibromyxosarcoma
H3.5 histone	Q6NXT2	135	408	0	0	Fibromyxosarcoma
H3 clustered histone 1	P68431	136	4110	1	0.000243309	Fibromyxosarcoma
H1.2 linker histone, cluster member	P16403	213	642	0	0	Fibromyxosarcoma
H3 clustered histone 13	Q71DI3	136	1233	0	0	Fibromyxosarcoma
H1.3 linker histone, cluster member	P16402	221	666	0	0	Fibromyxosarcoma
H2B clustered histone 12	O60814	126	381	0	0	Fibromyxosarcoma
H1.1 linker histone, cluster member	Q02539	215	648	0	0	Fibromyxosarcoma
H2A clustered histone 12	Q96KK5	128	387	0	0	Fibromyxosarcoma
H2A clustered histone 20	Q16777	129	390	0	0	Fibromyxosarcoma
H2B clustered histone 18	Q5QNW6	126	786	0	0	Fibromyxosarcoma
H2A clustered histone 1	Q96QV6	131	396	0	0	Fibromyxosarcoma
H1.6 linker histone, cluster member	P22492	207	624	0	0	Fibromyxosarcoma
H2B.W histone 2	P0C1H6	154	447	0	0	Fibromyxosarcoma
centromere protein A	P49450	140	423	0	0	Fibromyxosarcoma
H1.10 linker histone	Q92522	213	642	0	0	Fibromyxosarcoma
Histone H2B type 2-K1	A0A2R8Y619	122	369	0	0	Fibromyxosarcoma
H2B clustered histone 11	P06899	126	381	0	0	Fibromyxosarcoma
H2A.Z variant histone 2	Q71UI9	128	413	0	0	Fibromyxosarcoma
H1.0 linker histone	P07305	194	585	0	0	Fibromyxosarcoma
H2B clustered histone 15	Q99877	126	381	0	0	Fibromyxosarcoma
H2A clustered histone 14	Q99878	128	387	0	0	Fibromyxosarcoma
H2A.J histone	Q9BTM1	129	390	0	0	Fibromyxosarcoma
H2B clustered histone 5	P58876	126	381	0	0	Fibromyxosarcoma
H4 clustered histone 7	Q99525	98	297	0	0	Fibromyxosarcoma
H2B clustered histone 13	Q99880	126	381	0	0	Fibromyxosarcoma
H2B clustered histone 3	P33778	126	381	0	0	Fibromyxosarcoma
H3.Y histone 1	P0DPK2	136	411	0	0	Fibromyxosarcoma
H2A.P histone	O75409	117	354	0	0	Fibromyxosarcoma
H2A.B variant histone 1	P0C5Y9	115	348	0	0	Fibromyxosarcoma
H4 clustered histone 1	P62805	103	4368	0	0	Fibromyxosarcoma
macroH2A.1 histone	O75367	369	1318	0	0	Fibromyxosarcoma
H2A.B variant histone 2	P0C5Z0	115	696	0	0	Fibromyxosarcoma
H3.4 histone	Q16695	136	411	0	0	Fibromyxosarcoma
H2B clustered histone 9	Q93079	126	381	0	0	Fibromyxosarcoma
H2A clustered histone 4	P04908	130	786	0	0	Fibromyxosarcoma
macroH2A.2 histone	Q9P0M6	372	1119	0	0	Fibromyxosarcoma
H2B clustered histone 17	P23527	126	381	1	0.00262467	Fibromyxosarcoma
H2B clustered histone 21	Q16778	126	381	0	0	Fibromyxosarcoma
H2B.W histone 1	Q7Z2G1	175	444	0	0	Fibromyxosarcoma
H2A clustered histone 21	Q8IUE6	130	393	0	0	Spindle cell melanoma, NOS
Histone H2B type F-S	P57053	126	467	0	0	Spindle cell melanoma, NOS
H2A clustered histone 18	Q6FI13	130	786	0	0	Spindle cell melanoma, NOS
H2A.Z variant histone 1	P0C0S5	128	387	0	0	Spindle cell melanoma, NOS
H2A.X variant histone	P16104	143	432	0	0	Spindle cell melanoma, NOS
H2B clustered histone 10	P62807	126	1905	0	0	Spindle cell melanoma, NOS
Histone H2A-like 3	A0A3B3IU63	148	447	0	0	Spindle cell melanoma, NOS
Histone H2B type 3-B	Q8N257	126	381	0	0	Spindle cell melanoma, NOS
H2A clustered histone 6	Q93077	130	393	0	0	Spindle cell melanoma, NOS
H1.8 linker histone	Q8IZA3	346	1366	0	0	Spindle cell melanoma, NOS
H2B clustered histone 14	Q99879	126	381	0	0	Spindle cell melanoma, NOS
H3.Y histone 2	P0DPK5	147	444	0	0	Spindle cell melanoma, NOS
Histone H2A type 3	Q7L7L0	130	393	0	0	Spindle cell melanoma, NOS
H2A clustered histone 7	P20671	130	393	0	0	Spindle cell melanoma, NOS
Histone H3-7	Q5TEC6	136	411	0	0	Spindle cell melanoma, NOS
H1.7 linker histone	Q75WM6	255	768	0	0	Spindle cell melanoma, NOS
H1.5 linker histone, cluster member	P16401	226	681	0	0	Spindle cell melanoma, NOS
H1.4 linker histone, cluster member	P10412	219	660	0	0	Spindle cell melanoma, NOS
H2A clustered histone 11	P0C0S8	130	1965	0	0	Spindle cell melanoma, NOS
H3.3 histone A	P84243	136	822	0	0	Spindle cell melanoma, NOS
H2B clustered histone 1	Q96A08	127	384	0	0	Spindle cell melanoma, NOS
H3.5 histone	Q6NXT2	135	408	0	0	Spindle cell melanoma, NOS
H3 clustered histone 1	P68431	136	4110	0	0	Spindle cell melanoma, NOS
H1.2 linker histone, cluster member	P16403	213	642	0	0	Spindle cell melanoma, NOS
H3 clustered histone 13	Q71DI3	136	1233	0	0	Spindle cell melanoma, NOS
H1.3 linker histone, cluster member	P16402	221	666	0	0	Spindle cell melanoma, NOS
H2B clustered histone 12	O60814	126	381	0	0	Spindle cell melanoma, NOS
H1.1 linker histone, cluster member	Q02539	215	648	0	0	Spindle cell melanoma, NOS
H2A clustered histone 12	Q96KK5	128	387	0	0	Spindle cell melanoma, NOS
H2A clustered histone 20	Q16777	129	390	0	0	Spindle cell melanoma, NOS
H2B clustered histone 18	Q5QNW6	126	786	0	0	Spindle cell melanoma, NOS
H2A clustered histone 1	Q96QV6	131	396	0	0	Spindle cell melanoma, NOS
H1.6 linker histone, cluster member	P22492	207	624	0	0	Spindle cell melanoma, NOS
H2B.W histone 2	P0C1H6	154	447	0	0	Spindle cell melanoma, NOS
centromere protein A	P49450	140	423	0	0	Spindle cell melanoma, NOS
H1.10 linker histone	Q92522	213	642	0	0	Spindle cell melanoma, NOS
Histone H2B type 2-K1	A0A2R8Y619	122	369	0	0	Spindle cell melanoma, NOS
H2B clustered histone 11	P06899	126	381	0	0	Spindle cell melanoma, NOS
H2A.Z variant histone 2	Q71UI9	128	413	0	0	Spindle cell melanoma, NOS
H1.0 linker histone	P07305	194	585	0	0	Spindle cell melanoma, NOS
H2B clustered histone 15	Q99877	126	381	0	0	Spindle cell melanoma, NOS
H2A clustered histone 14	Q99878	128	387	0	0	Spindle cell melanoma, NOS
H2A.J histone	Q9BTM1	129	390	0	0	Spindle cell melanoma, NOS
H2B clustered histone 5	P58876	126	381	0	0	Spindle cell melanoma, NOS
H4 clustered histone 7	Q99525	98	297	1	0.003367	Spindle cell melanoma, NOS
H2B clustered histone 13	Q99880	126	381	0	0	Spindle cell melanoma, NOS
H2B clustered histone 3	P33778	126	381	0	0	Spindle cell melanoma, NOS
H3.Y histone 1	P0DPK2	136	411	0	0	Spindle cell melanoma, NOS
H2A.P histone	O75409	117	354	0	0	Spindle cell melanoma, NOS
H2A.B variant histone 1	P0C5Y9	115	348	0	0	Spindle cell melanoma, NOS
H4 clustered histone 1	P62805	103	4368	0	0	Spindle cell melanoma, NOS
macroH2A.1 histone	O75367	369	1318	0	0	Spindle cell melanoma, NOS
H2A.B variant histone 2	P0C5Z0	115	696	0	0	Spindle cell melanoma, NOS
H3.4 histone	Q16695	136	411	0	0	Spindle cell melanoma, NOS
H2B clustered histone 9	Q93079	126	381	0	0	Spindle cell melanoma, NOS
H2A clustered histone 4	P04908	130	786	0	0	Spindle cell melanoma, NOS
macroH2A.2 histone	Q9P0M6	372	1119	0	0	Spindle cell melanoma, NOS
H2B clustered histone 17	P23527	126	381	0	0	Spindle cell melanoma, NOS
H2B clustered histone 21	Q16778	126	381	0	0	Spindle cell melanoma, NOS
H2B.W histone 1	Q7Z2G1	175	444	0	0	Spindle cell melanoma, NOS
H2A clustered histone 21	Q8IUE6	130	393	0	0	Bronchiolo-alveolar carcinoma, non-mucinous
Histone H2B type F-S	P57053	126	467	0	0	Bronchiolo-alveolar carcinoma, non-mucinous
H2A clustered histone 18	Q6FI13	130	786	0	0	Bronchiolo-alveolar carcinoma, non-mucinous
H2A.Z variant histone 1	P0C0S5	128	387	0	0	Bronchiolo-alveolar carcinoma, non-mucinous
H2A.X variant histone	P16104	143	432	0	0	Bronchiolo-alveolar carcinoma, non-mucinous
H2B clustered histone 10	P62807	126	1905	0	0	Bronchiolo-alveolar carcinoma, non-mucinous
Histone H2A-like 3	A0A3B3IU63	148	447	0	0	Bronchiolo-alveolar carcinoma, non-mucinous
Histone H2B type 3-B	Q8N257	126	381	0	0	Bronchiolo-alveolar carcinoma, non-mucinous
H2A clustered histone 6	Q93077	130	393	1	0.00254453	Bronchiolo-alveolar carcinoma, non-mucinous
H1.8 linker histone	Q8IZA3	346	1366	0	0	Bronchiolo-alveolar carcinoma, non-mucinous
H2B clustered histone 14	Q99879	126	381	0	0	Bronchiolo-alveolar carcinoma, non-mucinous
H3.Y histone 2	P0DPK5	147	444	0	0	Bronchiolo-alveolar carcinoma, non-mucinous
Histone H2A type 3	Q7L7L0	130	393	0	0	Bronchiolo-alveolar carcinoma, non-mucinous
H2A clustered histone 7	P20671	130	393	0	0	Bronchiolo-alveolar carcinoma, non-mucinous
Histone H3-7	Q5TEC6	136	411	0	0	Bronchiolo-alveolar carcinoma, non-mucinous
H1.7 linker histone	Q75WM6	255	768	0	0	Bronchiolo-alveolar carcinoma, non-mucinous
H1.5 linker histone, cluster member	P16401	226	681	0	0	Bronchiolo-alveolar carcinoma, non-mucinous
H1.4 linker histone, cluster member	P10412	219	660	0	0	Bronchiolo-alveolar carcinoma, non-mucinous
H2A clustered histone 11	P0C0S8	130	1965	0	0	Bronchiolo-alveolar carcinoma, non-mucinous
H3.3 histone A	P84243	136	822	0	0	Bronchiolo-alveolar carcinoma, non-mucinous
H2B clustered histone 1	Q96A08	127	384	0	0	Bronchiolo-alveolar carcinoma, non-mucinous
H3.5 histone	Q6NXT2	135	408	0	0	Bronchiolo-alveolar carcinoma, non-mucinous
H3 clustered histone 1	P68431	136	4110	2	0.000486618	Bronchiolo-alveolar carcinoma, non-mucinous
H1.2 linker histone, cluster member	P16403	213	642	0	0	Bronchiolo-alveolar carcinoma, non-mucinous
H3 clustered histone 13	Q71DI3	136	1233	0	0	Bronchiolo-alveolar carcinoma, non-mucinous
H1.3 linker histone, cluster member	P16402	221	666	0	0	Bronchiolo-alveolar carcinoma, non-mucinous
H2B clustered histone 12	O60814	126	381	0	0	Bronchiolo-alveolar carcinoma, non-mucinous
H1.1 linker histone, cluster member	Q02539	215	648	0	0	Bronchiolo-alveolar carcinoma, non-mucinous
H2A clustered histone 12	Q96KK5	128	387	0	0	Bronchiolo-alveolar carcinoma, non-mucinous
H2A clustered histone 20	Q16777	129	390	1	0.0025641	Bronchiolo-alveolar carcinoma, non-mucinous
H2B clustered histone 18	Q5QNW6	126	786	0	0	Bronchiolo-alveolar carcinoma, non-mucinous
H2A clustered histone 1	Q96QV6	131	396	0	0	Bronchiolo-alveolar carcinoma, non-mucinous
H1.6 linker histone, cluster member	P22492	207	624	2	0.00320513	Bronchiolo-alveolar carcinoma, non-mucinous
H2B.W histone 2	P0C1H6	154	447	0	0	Bronchiolo-alveolar carcinoma, non-mucinous
centromere protein A	P49450	140	423	0	0	Bronchiolo-alveolar carcinoma, non-mucinous
H1.10 linker histone	Q92522	213	642	0	0	Bronchiolo-alveolar carcinoma, non-mucinous
Histone H2B type 2-K1	A0A2R8Y619	122	369	0	0	Bronchiolo-alveolar carcinoma, non-mucinous
H2B clustered histone 11	P06899	126	381	0	0	Bronchiolo-alveolar carcinoma, non-mucinous
H2A.Z variant histone 2	Q71UI9	128	413	0	0	Bronchiolo-alveolar carcinoma, non-mucinous
H1.0 linker histone	P07305	194	585	0	0	Bronchiolo-alveolar carcinoma, non-mucinous
H2B clustered histone 15	Q99877	126	381	0	0	Bronchiolo-alveolar carcinoma, non-mucinous
H2A clustered histone 14	Q99878	128	387	0	0	Bronchiolo-alveolar carcinoma, non-mucinous
H2A.J histone	Q9BTM1	129	390	0	0	Bronchiolo-alveolar carcinoma, non-mucinous
H2B clustered histone 5	P58876	126	381	0	0	Bronchiolo-alveolar carcinoma, non-mucinous
H4 clustered histone 7	Q99525	98	297	0	0	Bronchiolo-alveolar carcinoma, non-mucinous
H2B clustered histone 13	Q99880	126	381	0	0	Bronchiolo-alveolar carcinoma, non-mucinous
H2B clustered histone 3	P33778	126	381	0	0	Bronchiolo-alveolar carcinoma, non-mucinous
H3.Y histone 1	P0DPK2	136	411	0	0	Bronchiolo-alveolar carcinoma, non-mucinous
H2A.P histone	O75409	117	354	0	0	Bronchiolo-alveolar carcinoma, non-mucinous
H2A.B variant histone 1	P0C5Y9	115	348	0	0	Bronchiolo-alveolar carcinoma, non-mucinous
H4 clustered histone 1	P62805	103	4368	2	0.000457875	Bronchiolo-alveolar carcinoma, non-mucinous
macroH2A.1 histone	O75367	369	1318	0	0	Bronchiolo-alveolar carcinoma, non-mucinous
H2A.B variant histone 2	P0C5Z0	115	696	0	0	Bronchiolo-alveolar carcinoma, non-mucinous
H3.4 histone	Q16695	136	411	0	0	Bronchiolo-alveolar carcinoma, non-mucinous
H2B clustered histone 9	Q93079	126	381	0	0	Bronchiolo-alveolar carcinoma, non-mucinous
H2A clustered histone 4	P04908	130	786	0	0	Bronchiolo-alveolar carcinoma, non-mucinous
macroH2A.2 histone	Q9P0M6	372	1119	1	0.000893655	Bronchiolo-alveolar carcinoma, non-mucinous
H2B clustered histone 17	P23527	126	381	0	0	Bronchiolo-alveolar carcinoma, non-mucinous
H2B clustered histone 21	Q16778	126	381	0	0	Bronchiolo-alveolar carcinoma, non-mucinous
H2B.W histone 1	Q7Z2G1	175	444	0	0	Bronchiolo-alveolar carcinoma, non-mucinous
H2A clustered histone 21	Q8IUE6	130	393	0	0	Renal cell carcinoma, NOS
Histone H2B type F-S	P57053	126	467	0	0	Renal cell carcinoma, NOS
H2A clustered histone 18	Q6FI13	130	786	0	0	Renal cell carcinoma, NOS
H2A.Z variant histone 1	P0C0S5	128	387	0	0	Renal cell carcinoma, NOS
H2A.X variant histone	P16104	143	432	0	0	Renal cell carcinoma, NOS
H2B clustered histone 10	P62807	126	1905	1	0.000524934	Renal cell carcinoma, NOS
Histone H2A-like 3	A0A3B3IU63	148	447	0	0	Renal cell carcinoma, NOS
Histone H2B type 3-B	Q8N257	126	381	0	0	Renal cell carcinoma, NOS
H2A clustered histone 6	Q93077	130	393	0	0	Renal cell carcinoma, NOS
H1.8 linker histone	Q8IZA3	346	1366	1	0.000732064	Renal cell carcinoma, NOS
H2B clustered histone 14	Q99879	126	381	0	0	Renal cell carcinoma, NOS
H3.Y histone 2	P0DPK5	147	444	0	0	Renal cell carcinoma, NOS
Histone H2A type 3	Q7L7L0	130	393	0	0	Renal cell carcinoma, NOS
H2A clustered histone 7	P20671	130	393	0	0	Renal cell carcinoma, NOS
Histone H3-7	Q5TEC6	136	411	0	0	Renal cell carcinoma, NOS
H1.7 linker histone	Q75WM6	255	768	0	0	Renal cell carcinoma, NOS
H1.5 linker histone, cluster member	P16401	226	681	0	0	Renal cell carcinoma, NOS
H1.4 linker histone, cluster member	P10412	219	660	0	0	Renal cell carcinoma, NOS
H2A clustered histone 11	P0C0S8	130	1965	1	0.000508906	Renal cell carcinoma, NOS
H3.3 histone A	P84243	136	822	1	0.00121655	Renal cell carcinoma, NOS
H2B clustered histone 1	Q96A08	127	384	0	0	Renal cell carcinoma, NOS
H3.5 histone	Q6NXT2	135	408	0	0	Renal cell carcinoma, NOS
H3 clustered histone 1	P68431	136	4110	1	0.000243309	Renal cell carcinoma, NOS
H1.2 linker histone, cluster member	P16403	213	642	0	0	Renal cell carcinoma, NOS
H3 clustered histone 13	Q71DI3	136	1233	1	0.00081103	Renal cell carcinoma, NOS
H1.3 linker histone, cluster member	P16402	221	666	0	0	Renal cell carcinoma, NOS
H2B clustered histone 12	O60814	126	381	0	0	Renal cell carcinoma, NOS
H1.1 linker histone, cluster member	Q02539	215	648	0	0	Renal cell carcinoma, NOS
H2A clustered histone 12	Q96KK5	128	387	0	0	Renal cell carcinoma, NOS
H2A clustered histone 20	Q16777	129	390	1	0.0025641	Renal cell carcinoma, NOS
H2B clustered histone 18	Q5QNW6	126	786	0	0	Renal cell carcinoma, NOS
H2A clustered histone 1	Q96QV6	131	396	0	0	Renal cell carcinoma, NOS
H1.6 linker histone, cluster member	P22492	207	624	0	0	Renal cell carcinoma, NOS
H2B.W histone 2	P0C1H6	154	447	0	0	Renal cell carcinoma, NOS
centromere protein A	P49450	140	423	0	0	Renal cell carcinoma, NOS
H1.10 linker histone	Q92522	213	642	0	0	Renal cell carcinoma, NOS
Histone H2B type 2-K1	A0A2R8Y619	122	369	0	0	Renal cell carcinoma, NOS
H2B clustered histone 11	P06899	126	381	0	0	Renal cell carcinoma, NOS
H2A.Z variant histone 2	Q71UI9	128	413	0	0	Renal cell carcinoma, NOS
H1.0 linker histone	P07305	194	585	0	0	Renal cell carcinoma, NOS
H2B clustered histone 15	Q99877	126	381	0	0	Renal cell carcinoma, NOS
H2A clustered histone 14	Q99878	128	387	0	0	Renal cell carcinoma, NOS
H2A.J histone	Q9BTM1	129	390	0	0	Renal cell carcinoma, NOS
H2B clustered histone 5	P58876	126	381	0	0	Renal cell carcinoma, NOS
H4 clustered histone 7	Q99525	98	297	0	0	Renal cell carcinoma, NOS
H2B clustered histone 13	Q99880	126	381	0	0	Renal cell carcinoma, NOS
H2B clustered histone 3	P33778	126	381	0	0	Renal cell carcinoma, NOS
H3.Y histone 1	P0DPK2	136	411	0	0	Renal cell carcinoma, NOS
H2A.P histone	O75409	117	354	0	0	Renal cell carcinoma, NOS
H2A.B variant histone 1	P0C5Y9	115	348	0	0	Renal cell carcinoma, NOS
H4 clustered histone 1	P62805	103	4368	0	0	Renal cell carcinoma, NOS
macroH2A.1 histone	O75367	369	1318	0	0	Renal cell carcinoma, NOS
H2A.B variant histone 2	P0C5Z0	115	696	0	0	Renal cell carcinoma, NOS
H3.4 histone	Q16695	136	411	0	0	Renal cell carcinoma, NOS
H2B clustered histone 9	Q93079	126	381	0	0	Renal cell carcinoma, NOS
H2A clustered histone 4	P04908	130	786	0	0	Renal cell carcinoma, NOS
macroH2A.2 histone	Q9P0M6	372	1119	0	0	Renal cell carcinoma, NOS
H2B clustered histone 17	P23527	126	381	0	0	Renal cell carcinoma, NOS
H2B clustered histone 21	Q16778	126	381	0	0	Renal cell carcinoma, NOS
H2B.W histone 1	Q7Z2G1	175	444	0	0	Renal cell carcinoma, NOS
H2A clustered histone 21	Q8IUE6	130	393	0	0	Carcinosarcoma, NOS
Histone H2B type F-S	P57053	126	467	0	0	Carcinosarcoma, NOS
H2A clustered histone 18	Q6FI13	130	786	0	0	Carcinosarcoma, NOS
H2A.Z variant histone 1	P0C0S5	128	387	0	0	Carcinosarcoma, NOS
H2A.X variant histone	P16104	143	432	0	0	Carcinosarcoma, NOS
H2B clustered histone 10	P62807	126	1905	0	0	Carcinosarcoma, NOS
Histone H2A-like 3	A0A3B3IU63	148	447	0	0	Carcinosarcoma, NOS
Histone H2B type 3-B	Q8N257	126	381	0	0	Carcinosarcoma, NOS
H2A clustered histone 6	Q93077	130	393	0	0	Carcinosarcoma, NOS
H1.8 linker histone	Q8IZA3	346	1366	0	0	Carcinosarcoma, NOS
H2B clustered histone 14	Q99879	126	381	0	0	Carcinosarcoma, NOS
H3.Y histone 2	P0DPK5	147	444	0	0	Carcinosarcoma, NOS
Histone H2A type 3	Q7L7L0	130	393	0	0	Carcinosarcoma, NOS
H2A clustered histone 7	P20671	130	393	0	0	Carcinosarcoma, NOS
Histone H3-7	Q5TEC6	136	411	0	0	Carcinosarcoma, NOS
H1.7 linker histone	Q75WM6	255	768	0	0	Carcinosarcoma, NOS
H1.5 linker histone, cluster member	P16401	226	681	1	0.00146843	Carcinosarcoma, NOS
H1.4 linker histone, cluster member	P10412	219	660	0	0	Carcinosarcoma, NOS
H2A clustered histone 11	P0C0S8	130	1965	0	0	Carcinosarcoma, NOS
H3.3 histone A	P84243	136	822	0	0	Carcinosarcoma, NOS
H2B clustered histone 1	Q96A08	127	384	0	0	Carcinosarcoma, NOS
H3.5 histone	Q6NXT2	135	408	0	0	Carcinosarcoma, NOS
H3 clustered histone 1	P68431	136	4110	0	0	Carcinosarcoma, NOS
H1.2 linker histone, cluster member	P16403	213	642	0	0	Carcinosarcoma, NOS
H3 clustered histone 13	Q71DI3	136	1233	0	0	Carcinosarcoma, NOS
H1.3 linker histone, cluster member	P16402	221	666	0	0	Carcinosarcoma, NOS
H2B clustered histone 12	O60814	126	381	0	0	Carcinosarcoma, NOS
H1.1 linker histone, cluster member	Q02539	215	648	0	0	Carcinosarcoma, NOS
H2A clustered histone 12	Q96KK5	128	387	0	0	Carcinosarcoma, NOS
H2A clustered histone 20	Q16777	129	390	0	0	Carcinosarcoma, NOS
H2B clustered histone 18	Q5QNW6	126	786	0	0	Carcinosarcoma, NOS
H2A clustered histone 1	Q96QV6	131	396	0	0	Carcinosarcoma, NOS
H1.6 linker histone, cluster member	P22492	207	624	0	0	Carcinosarcoma, NOS
H2B.W histone 2	P0C1H6	154	447	0	0	Carcinosarcoma, NOS
centromere protein A	P49450	140	423	0	0	Carcinosarcoma, NOS
H1.10 linker histone	Q92522	213	642	0	0	Carcinosarcoma, NOS
Histone H2B type 2-K1	A0A2R8Y619	122	369	0	0	Carcinosarcoma, NOS
H2B clustered histone 11	P06899	126	381	0	0	Carcinosarcoma, NOS
H2A.Z variant histone 2	Q71UI9	128	413	0	0	Carcinosarcoma, NOS
H1.0 linker histone	P07305	194	585	0	0	Carcinosarcoma, NOS
H2B clustered histone 15	Q99877	126	381	0	0	Carcinosarcoma, NOS
H2A clustered histone 14	Q99878	128	387	0	0	Carcinosarcoma, NOS
H2A.J histone	Q9BTM1	129	390	0	0	Carcinosarcoma, NOS
H2B clustered histone 5	P58876	126	381	0	0	Carcinosarcoma, NOS
H4 clustered histone 7	Q99525	98	297	0	0	Carcinosarcoma, NOS
H2B clustered histone 13	Q99880	126	381	0	0	Carcinosarcoma, NOS
H2B clustered histone 3	P33778	126	381	0	0	Carcinosarcoma, NOS
H3.Y histone 1	P0DPK2	136	411	0	0	Carcinosarcoma, NOS
H2A.P histone	O75409	117	354	0	0	Carcinosarcoma, NOS
H2A.B variant histone 1	P0C5Y9	115	348	0	0	Carcinosarcoma, NOS
H4 clustered histone 1	P62805	103	4368	1	0.000228938	Carcinosarcoma, NOS
macroH2A.1 histone	O75367	369	1318	0	0	Carcinosarcoma, NOS
H2A.B variant histone 2	P0C5Z0	115	696	0	0	Carcinosarcoma, NOS
H3.4 histone	Q16695	136	411	0	0	Carcinosarcoma, NOS
H2B clustered histone 9	Q93079	126	381	0	0	Carcinosarcoma, NOS
H2A clustered histone 4	P04908	130	786	1	0.00127226	Carcinosarcoma, NOS
macroH2A.2 histone	Q9P0M6	372	1119	0	0	Carcinosarcoma, NOS
H2B clustered histone 17	P23527	126	381	0	0	Carcinosarcoma, NOS
H2B clustered histone 21	Q16778	126	381	0	0	Carcinosarcoma, NOS
H2B.W histone 1	Q7Z2G1	175	444	0	0	Carcinosarcoma, NOS
H2A clustered histone 21	Q8IUE6	130	393	0	0	Dedifferentiated liposarcoma
Histone H2B type F-S	P57053	126	467	0	0	Dedifferentiated liposarcoma
H2A clustered histone 18	Q6FI13	130	786	0	0	Dedifferentiated liposarcoma
H2A.Z variant histone 1	P0C0S5	128	387	0	0	Dedifferentiated liposarcoma
H2A.X variant histone	P16104	143	432	0	0	Dedifferentiated liposarcoma
H2B clustered histone 10	P62807	126	1905	0	0	Dedifferentiated liposarcoma
Histone H2A-like 3	A0A3B3IU63	148	447	0	0	Dedifferentiated liposarcoma
Histone H2B type 3-B	Q8N257	126	381	0	0	Dedifferentiated liposarcoma
H2A clustered histone 6	Q93077	130	393	0	0	Dedifferentiated liposarcoma
H1.8 linker histone	Q8IZA3	346	1366	0	0	Dedifferentiated liposarcoma
H2B clustered histone 14	Q99879	126	381	0	0	Dedifferentiated liposarcoma
H3.Y histone 2	P0DPK5	147	444	0	0	Dedifferentiated liposarcoma
Histone H2A type 3	Q7L7L0	130	393	0	0	Dedifferentiated liposarcoma
H2A clustered histone 7	P20671	130	393	0	0	Dedifferentiated liposarcoma
Histone H3-7	Q5TEC6	136	411	0	0	Dedifferentiated liposarcoma
H1.7 linker histone	Q75WM6	255	768	0	0	Dedifferentiated liposarcoma
H1.5 linker histone, cluster member	P16401	226	681	0	0	Dedifferentiated liposarcoma
H1.4 linker histone, cluster member	P10412	219	660	0	0	Dedifferentiated liposarcoma
H2A clustered histone 11	P0C0S8	130	1965	0	0	Dedifferentiated liposarcoma
H3.3 histone A	P84243	136	822	0	0	Dedifferentiated liposarcoma
H2B clustered histone 1	Q96A08	127	384	0	0	Dedifferentiated liposarcoma
H3.5 histone	Q6NXT2	135	408	0	0	Dedifferentiated liposarcoma
H3 clustered histone 1	P68431	136	4110	2	0.000486618	Dedifferentiated liposarcoma
H1.2 linker histone, cluster member	P16403	213	642	0	0	Dedifferentiated liposarcoma
H3 clustered histone 13	Q71DI3	136	1233	0	0	Dedifferentiated liposarcoma
H1.3 linker histone, cluster member	P16402	221	666	0	0	Dedifferentiated liposarcoma
H2B clustered histone 12	O60814	126	381	0	0	Dedifferentiated liposarcoma
H1.1 linker histone, cluster member	Q02539	215	648	0	0	Dedifferentiated liposarcoma
H2A clustered histone 12	Q96KK5	128	387	0	0	Dedifferentiated liposarcoma
H2A clustered histone 20	Q16777	129	390	0	0	Dedifferentiated liposarcoma
H2B clustered histone 18	Q5QNW6	126	786	1	0.00127226	Dedifferentiated liposarcoma
H2A clustered histone 1	Q96QV6	131	396	0	0	Dedifferentiated liposarcoma
H1.6 linker histone, cluster member	P22492	207	624	0	0	Dedifferentiated liposarcoma
H2B.W histone 2	P0C1H6	154	447	0	0	Dedifferentiated liposarcoma
centromere protein A	P49450	140	423	0	0	Dedifferentiated liposarcoma
H1.10 linker histone	Q92522	213	642	0	0	Dedifferentiated liposarcoma
Histone H2B type 2-K1	A0A2R8Y619	122	369	0	0	Dedifferentiated liposarcoma
H2B clustered histone 11	P06899	126	381	0	0	Dedifferentiated liposarcoma
H2A.Z variant histone 2	Q71UI9	128	413	0	0	Dedifferentiated liposarcoma
H1.0 linker histone	P07305	194	585	0	0	Dedifferentiated liposarcoma
H2B clustered histone 15	Q99877	126	381	0	0	Dedifferentiated liposarcoma
H2A clustered histone 14	Q99878	128	387	0	0	Dedifferentiated liposarcoma
H2A.J histone	Q9BTM1	129	390	0	0	Dedifferentiated liposarcoma
H2B clustered histone 5	P58876	126	381	0	0	Dedifferentiated liposarcoma
H4 clustered histone 7	Q99525	98	297	0	0	Dedifferentiated liposarcoma
H2B clustered histone 13	Q99880	126	381	0	0	Dedifferentiated liposarcoma
H2B clustered histone 3	P33778	126	381	0	0	Dedifferentiated liposarcoma
H3.Y histone 1	P0DPK2	136	411	0	0	Dedifferentiated liposarcoma
H2A.P histone	O75409	117	354	0	0	Dedifferentiated liposarcoma
H2A.B variant histone 1	P0C5Y9	115	348	0	0	Dedifferentiated liposarcoma
H4 clustered histone 1	P62805	103	4368	0	0	Dedifferentiated liposarcoma
macroH2A.1 histone	O75367	369	1318	0	0	Dedifferentiated liposarcoma
H2A.B variant histone 2	P0C5Z0	115	696	0	0	Dedifferentiated liposarcoma
H3.4 histone	Q16695	136	411	1	0.00243309	Dedifferentiated liposarcoma
H2B clustered histone 9	Q93079	126	381	0	0	Dedifferentiated liposarcoma
H2A clustered histone 4	P04908	130	786	0	0	Dedifferentiated liposarcoma
macroH2A.2 histone	Q9P0M6	372	1119	0	0	Dedifferentiated liposarcoma
H2B clustered histone 17	P23527	126	381	0	0	Dedifferentiated liposarcoma
H2B clustered histone 21	Q16778	126	381	0	0	Dedifferentiated liposarcoma
H2B.W histone 1	Q7Z2G1	175	444	0	0	Dedifferentiated liposarcoma
H2A clustered histone 21	Q8IUE6	130	393	0	0	Malignant fibrous histiocytoma
Histone H2B type F-S	P57053	126	467	0	0	Malignant fibrous histiocytoma
H2A clustered histone 18	Q6FI13	130	786	0	0	Malignant fibrous histiocytoma
H2A.Z variant histone 1	P0C0S5	128	387	0	0	Malignant fibrous histiocytoma
H2A.X variant histone	P16104	143	432	0	0	Malignant fibrous histiocytoma
H2B clustered histone 10	P62807	126	1905	0	0	Malignant fibrous histiocytoma
Histone H2A-like 3	A0A3B3IU63	148	447	0	0	Malignant fibrous histiocytoma
Histone H2B type 3-B	Q8N257	126	381	0	0	Malignant fibrous histiocytoma
H2A clustered histone 6	Q93077	130	393	1	0.00254453	Malignant fibrous histiocytoma
H1.8 linker histone	Q8IZA3	346	1366	0	0	Malignant fibrous histiocytoma
H2B clustered histone 14	Q99879	126	381	0	0	Malignant fibrous histiocytoma
H3.Y histone 2	P0DPK5	147	444	0	0	Malignant fibrous histiocytoma
Histone H2A type 3	Q7L7L0	130	393	0	0	Malignant fibrous histiocytoma
H2A clustered histone 7	P20671	130	393	0	0	Malignant fibrous histiocytoma
Histone H3-7	Q5TEC6	136	411	0	0	Malignant fibrous histiocytoma
H1.7 linker histone	Q75WM6	255	768	0	0	Malignant fibrous histiocytoma
H1.5 linker histone, cluster member	P16401	226	681	1	0.00146843	Malignant fibrous histiocytoma
H1.4 linker histone, cluster member	P10412	219	660	0	0	Malignant fibrous histiocytoma
H2A clustered histone 11	P0C0S8	130	1965	0	0	Malignant fibrous histiocytoma
H3.3 histone A	P84243	136	822	1	0.00121655	Malignant fibrous histiocytoma
H2B clustered histone 1	Q96A08	127	384	0	0	Malignant fibrous histiocytoma
H3.5 histone	Q6NXT2	135	408	0	0	Malignant fibrous histiocytoma
H3 clustered histone 1	P68431	136	4110	2	0.000486618	Malignant fibrous histiocytoma
H1.2 linker histone, cluster member	P16403	213	642	0	0	Malignant fibrous histiocytoma
H3 clustered histone 13	Q71DI3	136	1233	0	0	Malignant fibrous histiocytoma
H1.3 linker histone, cluster member	P16402	221	666	0	0	Malignant fibrous histiocytoma
H2B clustered histone 12	O60814	126	381	0	0	Malignant fibrous histiocytoma
H1.1 linker histone, cluster member	Q02539	215	648	0	0	Malignant fibrous histiocytoma
H2A clustered histone 12	Q96KK5	128	387	0	0	Malignant fibrous histiocytoma
H2A clustered histone 20	Q16777	129	390	0	0	Malignant fibrous histiocytoma
H2B clustered histone 18	Q5QNW6	126	786	0	0	Malignant fibrous histiocytoma
H2A clustered histone 1	Q96QV6	131	396	0	0	Malignant fibrous histiocytoma
H1.6 linker histone, cluster member	P22492	207	624	0	0	Malignant fibrous histiocytoma
H2B.W histone 2	P0C1H6	154	447	0	0	Malignant fibrous histiocytoma
centromere protein A	P49450	140	423	0	0	Malignant fibrous histiocytoma
H1.10 linker histone	Q92522	213	642	0	0	Malignant fibrous histiocytoma
Histone H2B type 2-K1	A0A2R8Y619	122	369	0	0	Malignant fibrous histiocytoma
H2B clustered histone 11	P06899	126	381	0	0	Malignant fibrous histiocytoma
H2A.Z variant histone 2	Q71UI9	128	413	0	0	Malignant fibrous histiocytoma
H1.0 linker histone	P07305	194	585	0	0	Malignant fibrous histiocytoma
H2B clustered histone 15	Q99877	126	381	0	0	Malignant fibrous histiocytoma
H2A clustered histone 14	Q99878	128	387	0	0	Malignant fibrous histiocytoma
H2A.J histone	Q9BTM1	129	390	0	0	Malignant fibrous histiocytoma
H2B clustered histone 5	P58876	126	381	0	0	Malignant fibrous histiocytoma
H4 clustered histone 7	Q99525	98	297	0	0	Malignant fibrous histiocytoma
H2B clustered histone 13	Q99880	126	381	0	0	Malignant fibrous histiocytoma
H2B clustered histone 3	P33778	126	381	0	0	Malignant fibrous histiocytoma
H3.Y histone 1	P0DPK2	136	411	0	0	Malignant fibrous histiocytoma
H2A.P histone	O75409	117	354	0	0	Malignant fibrous histiocytoma
H2A.B variant histone 1	P0C5Y9	115	348	0	0	Malignant fibrous histiocytoma
H4 clustered histone 1	P62805	103	4368	0	0	Malignant fibrous histiocytoma
macroH2A.1 histone	O75367	369	1318	0	0	Malignant fibrous histiocytoma
H2A.B variant histone 2	P0C5Z0	115	696	0	0	Malignant fibrous histiocytoma
H3.4 histone	Q16695	136	411	0	0	Malignant fibrous histiocytoma
H2B clustered histone 9	Q93079	126	381	0	0	Malignant fibrous histiocytoma
H2A clustered histone 4	P04908	130	786	0	0	Malignant fibrous histiocytoma
macroH2A.2 histone	Q9P0M6	372	1119	0	0	Malignant fibrous histiocytoma
H2B clustered histone 17	P23527	126	381	0	0	Malignant fibrous histiocytoma
H2B clustered histone 21	Q16778	126	381	0	0	Malignant fibrous histiocytoma
H2B.W histone 1	Q7Z2G1	175	444	0	0	Malignant fibrous histiocytoma
H2A clustered histone 21	Q8IUE6	130	393	0	0	Thymoma, type AB, malignant
Histone H2B type F-S	P57053	126	467	0	0	Thymoma, type AB, malignant
H2A clustered histone 18	Q6FI13	130	786	0	0	Thymoma, type AB, malignant
H2A.Z variant histone 1	P0C0S5	128	387	0	0	Thymoma, type AB, malignant
H2A.X variant histone	P16104	143	432	0	0	Thymoma, type AB, malignant
H2B clustered histone 10	P62807	126	1905	0	0	Thymoma, type AB, malignant
Histone H2A-like 3	A0A3B3IU63	148	447	0	0	Thymoma, type AB, malignant
Histone H2B type 3-B	Q8N257	126	381	0	0	Thymoma, type AB, malignant
H2A clustered histone 6	Q93077	130	393	0	0	Thymoma, type AB, malignant
H1.8 linker histone	Q8IZA3	346	1366	0	0	Thymoma, type AB, malignant
H2B clustered histone 14	Q99879	126	381	0	0	Thymoma, type AB, malignant
H3.Y histone 2	P0DPK5	147	444	0	0	Thymoma, type AB, malignant
Histone H2A type 3	Q7L7L0	130	393	0	0	Thymoma, type AB, malignant
H2A clustered histone 7	P20671	130	393	0	0	Thymoma, type AB, malignant
Histone H3-7	Q5TEC6	136	411	0	0	Thymoma, type AB, malignant
H1.7 linker histone	Q75WM6	255	768	0	0	Thymoma, type AB, malignant
H1.5 linker histone, cluster member	P16401	226	681	0	0	Thymoma, type AB, malignant
H1.4 linker histone, cluster member	P10412	219	660	0	0	Thymoma, type AB, malignant
H2A clustered histone 11	P0C0S8	130	1965	0	0	Thymoma, type AB, malignant
H3.3 histone A	P84243	136	822	0	0	Thymoma, type AB, malignant
H2B clustered histone 1	Q96A08	127	384	0	0	Thymoma, type AB, malignant
H3.5 histone	Q6NXT2	135	408	0	0	Thymoma, type AB, malignant
H3 clustered histone 1	P68431	136	4110	0	0	Thymoma, type AB, malignant
H1.2 linker histone, cluster member	P16403	213	642	0	0	Thymoma, type AB, malignant
H3 clustered histone 13	Q71DI3	136	1233	0	0	Thymoma, type AB, malignant
H1.3 linker histone, cluster member	P16402	221	666	0	0	Thymoma, type AB, malignant
H2B clustered histone 12	O60814	126	381	0	0	Thymoma, type AB, malignant
H1.1 linker histone, cluster member	Q02539	215	648	0	0	Thymoma, type AB, malignant
H2A clustered histone 12	Q96KK5	128	387	0	0	Thymoma, type AB, malignant
H2A clustered histone 20	Q16777	129	390	0	0	Thymoma, type AB, malignant
H2B clustered histone 18	Q5QNW6	126	786	0	0	Thymoma, type AB, malignant
H2A clustered histone 1	Q96QV6	131	396	0	0	Thymoma, type AB, malignant
H1.6 linker histone, cluster member	P22492	207	624	0	0	Thymoma, type AB, malignant
H2B.W histone 2	P0C1H6	154	447	0	0	Thymoma, type AB, malignant
centromere protein A	P49450	140	423	0	0	Thymoma, type AB, malignant
H1.10 linker histone	Q92522	213	642	0	0	Thymoma, type AB, malignant
Histone H2B type 2-K1	A0A2R8Y619	122	369	0	0	Thymoma, type AB, malignant
H2B clustered histone 11	P06899	126	381	0	0	Thymoma, type AB, malignant
H2A.Z variant histone 2	Q71UI9	128	413	0	0	Thymoma, type AB, malignant
H1.0 linker histone	P07305	194	585	0	0	Thymoma, type AB, malignant
H2B clustered histone 15	Q99877	126	381	0	0	Thymoma, type AB, malignant
H2A clustered histone 14	Q99878	128	387	0	0	Thymoma, type AB, malignant
H2A.J histone	Q9BTM1	129	390	0	0	Thymoma, type AB, malignant
H2B clustered histone 5	P58876	126	381	0	0	Thymoma, type AB, malignant
H4 clustered histone 7	Q99525	98	297	0	0	Thymoma, type AB, malignant
H2B clustered histone 13	Q99880	126	381	0	0	Thymoma, type AB, malignant
H2B clustered histone 3	P33778	126	381	0	0	Thymoma, type AB, malignant
H3.Y histone 1	P0DPK2	136	411	0	0	Thymoma, type AB, malignant
H2A.P histone	O75409	117	354	0	0	Thymoma, type AB, malignant
H2A.B variant histone 1	P0C5Y9	115	348	0	0	Thymoma, type AB, malignant
H4 clustered histone 1	P62805	103	4368	0	0	Thymoma, type AB, malignant
macroH2A.1 histone	O75367	369	1318	0	0	Thymoma, type AB, malignant
H2A.B variant histone 2	P0C5Z0	115	696	0	0	Thymoma, type AB, malignant
H3.4 histone	Q16695	136	411	0	0	Thymoma, type AB, malignant
H2B clustered histone 9	Q93079	126	381	0	0	Thymoma, type AB, malignant
H2A clustered histone 4	P04908	130	786	0	0	Thymoma, type AB, malignant
macroH2A.2 histone	Q9P0M6	372	1119	0	0	Thymoma, type AB, malignant
H2B clustered histone 17	P23527	126	381	0	0	Thymoma, type AB, malignant
H2B clustered histone 21	Q16778	126	381	0	0	Thymoma, type AB, malignant
H2B.W histone 1	Q7Z2G1	175	444	0	0	Thymoma, type AB, malignant
H2A clustered histone 21	Q8IUE6	130	393	0	0	Thymoma, type B2, malignant
Histone H2B type F-S	P57053	126	467	0	0	Thymoma, type B2, malignant
H2A clustered histone 18	Q6FI13	130	786	0	0	Thymoma, type B2, malignant
H2A.Z variant histone 1	P0C0S5	128	387	0	0	Thymoma, type B2, malignant
H2A.X variant histone	P16104	143	432	0	0	Thymoma, type B2, malignant
H2B clustered histone 10	P62807	126	1905	0	0	Thymoma, type B2, malignant
Histone H2A-like 3	A0A3B3IU63	148	447	0	0	Thymoma, type B2, malignant
Histone H2B type 3-B	Q8N257	126	381	0	0	Thymoma, type B2, malignant
H2A clustered histone 6	Q93077	130	393	1	0.00254453	Thymoma, type B2, malignant
H1.8 linker histone	Q8IZA3	346	1366	0	0	Thymoma, type B2, malignant
H2B clustered histone 14	Q99879	126	381	0	0	Thymoma, type B2, malignant
H3.Y histone 2	P0DPK5	147	444	0	0	Thymoma, type B2, malignant
Histone H2A type 3	Q7L7L0	130	393	0	0	Thymoma, type B2, malignant
H2A clustered histone 7	P20671	130	393	0	0	Thymoma, type B2, malignant
Histone H3-7	Q5TEC6	136	411	0	0	Thymoma, type B2, malignant
H1.7 linker histone	Q75WM6	255	768	0	0	Thymoma, type B2, malignant
H1.5 linker histone, cluster member	P16401	226	681	0	0	Thymoma, type B2, malignant
H1.4 linker histone, cluster member	P10412	219	660	0	0	Thymoma, type B2, malignant
H2A clustered histone 11	P0C0S8	130	1965	0	0	Thymoma, type B2, malignant
H3.3 histone A	P84243	136	822	0	0	Thymoma, type B2, malignant
H2B clustered histone 1	Q96A08	127	384	0	0	Thymoma, type B2, malignant
H3.5 histone	Q6NXT2	135	408	0	0	Thymoma, type B2, malignant
H3 clustered histone 1	P68431	136	4110	0	0	Thymoma, type B2, malignant
H1.2 linker histone, cluster member	P16403	213	642	0	0	Thymoma, type B2, malignant
H3 clustered histone 13	Q71DI3	136	1233	0	0	Thymoma, type B2, malignant
H1.3 linker histone, cluster member	P16402	221	666	0	0	Thymoma, type B2, malignant
H2B clustered histone 12	O60814	126	381	0	0	Thymoma, type B2, malignant
H1.1 linker histone, cluster member	Q02539	215	648	0	0	Thymoma, type B2, malignant
H2A clustered histone 12	Q96KK5	128	387	0	0	Thymoma, type B2, malignant
H2A clustered histone 20	Q16777	129	390	0	0	Thymoma, type B2, malignant
H2B clustered histone 18	Q5QNW6	126	786	0	0	Thymoma, type B2, malignant
H2A clustered histone 1	Q96QV6	131	396	0	0	Thymoma, type B2, malignant
H1.6 linker histone, cluster member	P22492	207	624	0	0	Thymoma, type B2, malignant
H2B.W histone 2	P0C1H6	154	447	0	0	Thymoma, type B2, malignant
centromere protein A	P49450	140	423	0	0	Thymoma, type B2, malignant
H1.10 linker histone	Q92522	213	642	0	0	Thymoma, type B2, malignant
Histone H2B type 2-K1	A0A2R8Y619	122	369	0	0	Thymoma, type B2, malignant
H2B clustered histone 11	P06899	126	381	0	0	Thymoma, type B2, malignant
H2A.Z variant histone 2	Q71UI9	128	413	0	0	Thymoma, type B2, malignant
H1.0 linker histone	P07305	194	585	0	0	Thymoma, type B2, malignant
H2B clustered histone 15	Q99877	126	381	0	0	Thymoma, type B2, malignant
H2A clustered histone 14	Q99878	128	387	0	0	Thymoma, type B2, malignant
H2A.J histone	Q9BTM1	129	390	0	0	Thymoma, type B2, malignant
H2B clustered histone 5	P58876	126	381	0	0	Thymoma, type B2, malignant
H4 clustered histone 7	Q99525	98	297	0	0	Thymoma, type B2, malignant
H2B clustered histone 13	Q99880	126	381	0	0	Thymoma, type B2, malignant
H2B clustered histone 3	P33778	126	381	0	0	Thymoma, type B2, malignant
H3.Y histone 1	P0DPK2	136	411	0	0	Thymoma, type B2, malignant
H2A.P histone	O75409	117	354	0	0	Thymoma, type B2, malignant
H2A.B variant histone 1	P0C5Y9	115	348	0	0	Thymoma, type B2, malignant
H4 clustered histone 1	P62805	103	4368	0	0	Thymoma, type B2, malignant
macroH2A.1 histone	O75367	369	1318	0	0	Thymoma, type B2, malignant
H2A.B variant histone 2	P0C5Z0	115	696	0	0	Thymoma, type B2, malignant
H3.4 histone	Q16695	136	411	0	0	Thymoma, type B2, malignant
H2B clustered histone 9	Q93079	126	381	0	0	Thymoma, type B2, malignant
H2A clustered histone 4	P04908	130	786	0	0	Thymoma, type B2, malignant
macroH2A.2 histone	Q9P0M6	372	1119	0	0	Thymoma, type B2, malignant
H2B clustered histone 17	P23527	126	381	0	0	Thymoma, type B2, malignant
H2B clustered histone 21	Q16778	126	381	0	0	Thymoma, type B2, malignant
H2B.W histone 1	Q7Z2G1	175	444	0	0	Thymoma, type B2, malignant
H2A clustered histone 21	Q8IUE6	130	393	0	0	Astrocytoma, NOS
Histone H2B type F-S	P57053	126	467	0	0	Astrocytoma, NOS
H2A clustered histone 18	Q6FI13	130	786	0	0	Astrocytoma, NOS
H2A.Z variant histone 1	P0C0S5	128	387	0	0	Astrocytoma, NOS
H2A.X variant histone	P16104	143	432	1	0.00231481	Astrocytoma, NOS
H2B clustered histone 10	P62807	126	1905	0	0	Astrocytoma, NOS
Histone H2A-like 3	A0A3B3IU63	148	447	0	0	Astrocytoma, NOS
Histone H2B type 3-B	Q8N257	126	381	0	0	Astrocytoma, NOS
H2A clustered histone 6	Q93077	130	393	0	0	Astrocytoma, NOS
H1.8 linker histone	Q8IZA3	346	1366	0	0	Astrocytoma, NOS
H2B clustered histone 14	Q99879	126	381	0	0	Astrocytoma, NOS
H3.Y histone 2	P0DPK5	147	444	0	0	Astrocytoma, NOS
Histone H2A type 3	Q7L7L0	130	393	0	0	Astrocytoma, NOS
H2A clustered histone 7	P20671	130	393	0	0	Astrocytoma, NOS
Histone H3-7	Q5TEC6	136	411	0	0	Astrocytoma, NOS
H1.7 linker histone	Q75WM6	255	768	0	0	Astrocytoma, NOS
H1.5 linker histone, cluster member	P16401	226	681	0	0	Astrocytoma, NOS
H1.4 linker histone, cluster member	P10412	219	660	0	0	Astrocytoma, NOS
H2A clustered histone 11	P0C0S8	130	1965	0	0	Astrocytoma, NOS
H3.3 histone A	P84243	136	822	2	0.00243309	Astrocytoma, NOS
H2B clustered histone 1	Q96A08	127	384	0	0	Astrocytoma, NOS
H3.5 histone	Q6NXT2	135	408	0	0	Astrocytoma, NOS
H3 clustered histone 1	P68431	136	4110	0	0	Astrocytoma, NOS
H1.2 linker histone, cluster member	P16403	213	642	0	0	Astrocytoma, NOS
H3 clustered histone 13	Q71DI3	136	1233	0	0	Astrocytoma, NOS
H1.3 linker histone, cluster member	P16402	221	666	0	0	Astrocytoma, NOS
H2B clustered histone 12	O60814	126	381	0	0	Astrocytoma, NOS
H1.1 linker histone, cluster member	Q02539	215	648	0	0	Astrocytoma, NOS
H2A clustered histone 12	Q96KK5	128	387	0	0	Astrocytoma, NOS
H2A clustered histone 20	Q16777	129	390	0	0	Astrocytoma, NOS
H2B clustered histone 18	Q5QNW6	126	786	0	0	Astrocytoma, NOS
H2A clustered histone 1	Q96QV6	131	396	1	0.00252525	Astrocytoma, NOS
H1.6 linker histone, cluster member	P22492	207	624	0	0	Astrocytoma, NOS
H2B.W histone 2	P0C1H6	154	447	0	0	Astrocytoma, NOS
centromere protein A	P49450	140	423	0	0	Astrocytoma, NOS
H1.10 linker histone	Q92522	213	642	0	0	Astrocytoma, NOS
Histone H2B type 2-K1	A0A2R8Y619	122	369	0	0	Astrocytoma, NOS
H2B clustered histone 11	P06899	126	381	0	0	Astrocytoma, NOS
H2A.Z variant histone 2	Q71UI9	128	413	0	0	Astrocytoma, NOS
H1.0 linker histone	P07305	194	585	0	0	Astrocytoma, NOS
H2B clustered histone 15	Q99877	126	381	0	0	Astrocytoma, NOS
H2A clustered histone 14	Q99878	128	387	0	0	Astrocytoma, NOS
H2A.J histone	Q9BTM1	129	390	0	0	Astrocytoma, NOS
H2B clustered histone 5	P58876	126	381	0	0	Astrocytoma, NOS
H4 clustered histone 7	Q99525	98	297	1	0.003367	Astrocytoma, NOS
H2B clustered histone 13	Q99880	126	381	0	0	Astrocytoma, NOS
H2B clustered histone 3	P33778	126	381	0	0	Astrocytoma, NOS
H3.Y histone 1	P0DPK2	136	411	0	0	Astrocytoma, NOS
H2A.P histone	O75409	117	354	0	0	Astrocytoma, NOS
H2A.B variant histone 1	P0C5Y9	115	348	0	0	Astrocytoma, NOS
H4 clustered histone 1	P62805	103	4368	0	0	Astrocytoma, NOS
macroH2A.1 histone	O75367	369	1318	0	0	Astrocytoma, NOS
H2A.B variant histone 2	P0C5Z0	115	696	0	0	Astrocytoma, NOS
H3.4 histone	Q16695	136	411	0	0	Astrocytoma, NOS
H2B clustered histone 9	Q93079	126	381	0	0	Astrocytoma, NOS
H2A clustered histone 4	P04908	130	786	0	0	Astrocytoma, NOS
macroH2A.2 histone	Q9P0M6	372	1119	0	0	Astrocytoma, NOS
H2B clustered histone 17	P23527	126	381	0	0	Astrocytoma, NOS
H2B clustered histone 21	Q16778	126	381	0	0	Astrocytoma, NOS
H2B.W histone 1	Q7Z2G1	175	444	0	0	Astrocytoma, NOS
H2A clustered histone 21	Q8IUE6	130	393	3	0.00763359	Adenocarcinoma, intestinal type
Histone H2B type F-S	P57053	126	467	0	0	Adenocarcinoma, intestinal type
H2A clustered histone 18	Q6FI13	130	786	0	0	Adenocarcinoma, intestinal type
H2A.Z variant histone 1	P0C0S5	128	387	0	0	Adenocarcinoma, intestinal type
H2A.X variant histone	P16104	143	432	0	0	Adenocarcinoma, intestinal type
H2B clustered histone 10	P62807	126	1905	1	0.000524934	Adenocarcinoma, intestinal type
Histone H2A-like 3	A0A3B3IU63	148	447	0	0	Adenocarcinoma, intestinal type
Histone H2B type 3-B	Q8N257	126	381	2	0.00524934	Adenocarcinoma, intestinal type
H2A clustered histone 6	Q93077	130	393	0	0	Adenocarcinoma, intestinal type
H1.8 linker histone	Q8IZA3	346	1366	0	0	Adenocarcinoma, intestinal type
H2B clustered histone 14	Q99879	126	381	0	0	Adenocarcinoma, intestinal type
H3.Y histone 2	P0DPK5	147	444	0	0	Adenocarcinoma, intestinal type
Histone H2A type 3	Q7L7L0	130	393	0	0	Adenocarcinoma, intestinal type
H2A clustered histone 7	P20671	130	393	0	0	Adenocarcinoma, intestinal type
Histone H3-7	Q5TEC6	136	411	0	0	Adenocarcinoma, intestinal type
H1.7 linker histone	Q75WM6	255	768	4	0.00520833	Adenocarcinoma, intestinal type
H1.5 linker histone, cluster member	P16401	226	681	3	0.00440529	Adenocarcinoma, intestinal type
H1.4 linker histone, cluster member	P10412	219	660	2	0.0030303	Adenocarcinoma, intestinal type
H2A clustered histone 11	P0C0S8	130	1965	0	0	Adenocarcinoma, intestinal type
H3.3 histone A	P84243	136	822	0	0	Adenocarcinoma, intestinal type
H2B clustered histone 1	Q96A08	127	384	0	0	Adenocarcinoma, intestinal type
H3.5 histone	Q6NXT2	135	408	0	0	Adenocarcinoma, intestinal type
H3 clustered histone 1	P68431	136	4110	5	0.00121655	Adenocarcinoma, intestinal type
H1.2 linker histone, cluster member	P16403	213	642	1	0.00155763	Adenocarcinoma, intestinal type
H3 clustered histone 13	Q71DI3	136	1233	2	0.00162206	Adenocarcinoma, intestinal type
H1.3 linker histone, cluster member	P16402	221	666	2	0.003003	Adenocarcinoma, intestinal type
H2B clustered histone 12	O60814	126	381	1	0.00262467	Adenocarcinoma, intestinal type
H1.1 linker histone, cluster member	Q02539	215	648	2	0.00308642	Adenocarcinoma, intestinal type
H2A clustered histone 12	Q96KK5	128	387	3	0.00775194	Adenocarcinoma, intestinal type
H2A clustered histone 20	Q16777	129	390	3	0.00769231	Adenocarcinoma, intestinal type
H2B clustered histone 18	Q5QNW6	126	786	1	0.00127226	Adenocarcinoma, intestinal type
H2A clustered histone 1	Q96QV6	131	396	2	0.00505051	Adenocarcinoma, intestinal type
H1.6 linker histone, cluster member	P22492	207	624	0	0	Adenocarcinoma, intestinal type
H2B.W histone 2	P0C1H6	154	447	1	0.00223714	Adenocarcinoma, intestinal type
centromere protein A	P49450	140	423	0	0	Adenocarcinoma, intestinal type
H1.10 linker histone	Q92522	213	642	0	0	Adenocarcinoma, intestinal type
Histone H2B type 2-K1	A0A2R8Y619	122	369	0	0	Adenocarcinoma, intestinal type
H2B clustered histone 11	P06899	126	381	2	0.00524934	Adenocarcinoma, intestinal type
H2A.Z variant histone 2	Q71UI9	128	413	0	0	Adenocarcinoma, intestinal type
H1.0 linker histone	P07305	194	585	2	0.0034188	Adenocarcinoma, intestinal type
H2B clustered histone 15	Q99877	126	381	2	0.00524934	Adenocarcinoma, intestinal type
H2A clustered histone 14	Q99878	128	387	0	0	Adenocarcinoma, intestinal type
H2A.J histone	Q9BTM1	129	390	0	0	Adenocarcinoma, intestinal type
H2B clustered histone 5	P58876	126	381	1	0.00262467	Adenocarcinoma, intestinal type
H4 clustered histone 7	Q99525	98	297	2	0.00673401	Adenocarcinoma, intestinal type
H2B clustered histone 13	Q99880	126	381	0	0	Adenocarcinoma, intestinal type
H2B clustered histone 3	P33778	126	381	1	0.00262467	Adenocarcinoma, intestinal type
H3.Y histone 1	P0DPK2	136	411	0	0	Adenocarcinoma, intestinal type
H2A.P histone	O75409	117	354	0	0	Adenocarcinoma, intestinal type
H2A.B variant histone 1	P0C5Y9	115	348	1	0.00287356	Adenocarcinoma, intestinal type
H4 clustered histone 1	P62805	103	4368	10	0.00228938	Adenocarcinoma, intestinal type
macroH2A.1 histone	O75367	369	1318	2	0.00151745	Adenocarcinoma, intestinal type
H2A.B variant histone 2	P0C5Z0	115	696	0	0	Adenocarcinoma, intestinal type
H3.4 histone	Q16695	136	411	2	0.00486618	Adenocarcinoma, intestinal type
H2B clustered histone 9	Q93079	126	381	2	0.00524934	Adenocarcinoma, intestinal type
H2A clustered histone 4	P04908	130	786	0	0	Adenocarcinoma, intestinal type
macroH2A.2 histone	Q9P0M6	372	1119	1	0.000893655	Adenocarcinoma, intestinal type
H2B clustered histone 17	P23527	126	381	1	0.00262467	Adenocarcinoma, intestinal type
H2B clustered histone 21	Q16778	126	381	0	0	Adenocarcinoma, intestinal type
H2B.W histone 1	Q7Z2G1	175	444	2	0.0045045	Adenocarcinoma, intestinal type
H2A clustered histone 21	Q8IUE6	130	393	0	0	Acute myeloid leukemia, NOS
Histone H2B type F-S	P57053	126	467	0	0	Acute myeloid leukemia, NOS
H2A clustered histone 18	Q6FI13	130	786	0	0	Acute myeloid leukemia, NOS
H2A.Z variant histone 1	P0C0S5	128	387	0	0	Acute myeloid leukemia, NOS
H2A.X variant histone	P16104	143	432	0	0	Acute myeloid leukemia, NOS
H2B clustered histone 10	P62807	126	1905	0	0	Acute myeloid leukemia, NOS
Histone H2A-like 3	A0A3B3IU63	148	447	0	0	Acute myeloid leukemia, NOS
Histone H2B type 3-B	Q8N257	126	381	0	0	Acute myeloid leukemia, NOS
H2A clustered histone 6	Q93077	130	393	0	0	Acute myeloid leukemia, NOS
H1.8 linker histone	Q8IZA3	346	1366	1	0.000732064	Acute myeloid leukemia, NOS
H2B clustered histone 14	Q99879	126	381	1	0.00262467	Acute myeloid leukemia, NOS
H3.Y histone 2	P0DPK5	147	444	0	0	Acute myeloid leukemia, NOS
Histone H2A type 3	Q7L7L0	130	393	0	0	Acute myeloid leukemia, NOS
H2A clustered histone 7	P20671	130	393	0	0	Acute myeloid leukemia, NOS
Histone H3-7	Q5TEC6	136	411	0	0	Acute myeloid leukemia, NOS
H1.7 linker histone	Q75WM6	255	768	0	0	Acute myeloid leukemia, NOS
H1.5 linker histone, cluster member	P16401	226	681	0	0	Acute myeloid leukemia, NOS
H1.4 linker histone, cluster member	P10412	219	660	0	0	Acute myeloid leukemia, NOS
H2A clustered histone 11	P0C0S8	130	1965	0	0	Acute myeloid leukemia, NOS
H3.3 histone A	P84243	136	822	0	0	Acute myeloid leukemia, NOS
H2B clustered histone 1	Q96A08	127	384	0	0	Acute myeloid leukemia, NOS
H3.5 histone	Q6NXT2	135	408	0	0	Acute myeloid leukemia, NOS
H3 clustered histone 1	P68431	136	4110	1	0.000243309	Acute myeloid leukemia, NOS
H1.2 linker histone, cluster member	P16403	213	642	0	0	Acute myeloid leukemia, NOS
H3 clustered histone 13	Q71DI3	136	1233	0	0	Acute myeloid leukemia, NOS
H1.3 linker histone, cluster member	P16402	221	666	0	0	Acute myeloid leukemia, NOS
H2B clustered histone 12	O60814	126	381	0	0	Acute myeloid leukemia, NOS
H1.1 linker histone, cluster member	Q02539	215	648	0	0	Acute myeloid leukemia, NOS
H2A clustered histone 12	Q96KK5	128	387	0	0	Acute myeloid leukemia, NOS
H2A clustered histone 20	Q16777	129	390	0	0	Acute myeloid leukemia, NOS
H2B clustered histone 18	Q5QNW6	126	786	0	0	Acute myeloid leukemia, NOS
H2A clustered histone 1	Q96QV6	131	396	0	0	Acute myeloid leukemia, NOS
H1.6 linker histone, cluster member	P22492	207	624	0	0	Acute myeloid leukemia, NOS
H2B.W histone 2	P0C1H6	154	447	0	0	Acute myeloid leukemia, NOS
centromere protein A	P49450	140	423	0	0	Acute myeloid leukemia, NOS
H1.10 linker histone	Q92522	213	642	0	0	Acute myeloid leukemia, NOS
Histone H2B type 2-K1	A0A2R8Y619	122	369	0	0	Acute myeloid leukemia, NOS
H2B clustered histone 11	P06899	126	381	0	0	Acute myeloid leukemia, NOS
H2A.Z variant histone 2	Q71UI9	128	413	0	0	Acute myeloid leukemia, NOS
H1.0 linker histone	P07305	194	585	0	0	Acute myeloid leukemia, NOS
H2B clustered histone 15	Q99877	126	381	0	0	Acute myeloid leukemia, NOS
H2A clustered histone 14	Q99878	128	387	0	0	Acute myeloid leukemia, NOS
H2A.J histone	Q9BTM1	129	390	0	0	Acute myeloid leukemia, NOS
H2B clustered histone 5	P58876	126	381	0	0	Acute myeloid leukemia, NOS
H4 clustered histone 7	Q99525	98	297	0	0	Acute myeloid leukemia, NOS
H2B clustered histone 13	Q99880	126	381	0	0	Acute myeloid leukemia, NOS
H2B clustered histone 3	P33778	126	381	0	0	Acute myeloid leukemia, NOS
H3.Y histone 1	P0DPK2	136	411	0	0	Acute myeloid leukemia, NOS
H2A.P histone	O75409	117	354	0	0	Acute myeloid leukemia, NOS
H2A.B variant histone 1	P0C5Y9	115	348	0	0	Acute myeloid leukemia, NOS
H4 clustered histone 1	P62805	103	4368	0	0	Acute myeloid leukemia, NOS
macroH2A.1 histone	O75367	369	1318	0	0	Acute myeloid leukemia, NOS
H2A.B variant histone 2	P0C5Z0	115	696	0	0	Acute myeloid leukemia, NOS
H3.4 histone	Q16695	136	411	1	0.00243309	Acute myeloid leukemia, NOS
H2B clustered histone 9	Q93079	126	381	0	0	Acute myeloid leukemia, NOS
H2A clustered histone 4	P04908	130	786	0	0	Acute myeloid leukemia, NOS
macroH2A.2 histone	Q9P0M6	372	1119	0	0	Acute myeloid leukemia, NOS
H2B clustered histone 17	P23527	126	381	0	0	Acute myeloid leukemia, NOS
H2B clustered histone 21	Q16778	126	381	0	0	Acute myeloid leukemia, NOS
H2B.W histone 1	Q7Z2G1	175	444	0	0	Acute myeloid leukemia, NOS
H2A clustered histone 21	Q8IUE6	130	393	3	0.00763359	Serous cystadenocarcinoma, NOS
Histone H2B type F-S	P57053	126	467	0	0	Serous cystadenocarcinoma, NOS
H2A clustered histone 18	Q6FI13	130	786	0	0	Serous cystadenocarcinoma, NOS
H2A.Z variant histone 1	P0C0S5	128	387	0	0	Serous cystadenocarcinoma, NOS
H2A.X variant histone	P16104	143	432	1	0.00231481	Serous cystadenocarcinoma, NOS
H2B clustered histone 10	P62807	126	1905	20	0.0104987	Serous cystadenocarcinoma, NOS
Histone H2A-like 3	A0A3B3IU63	148	447	0	0	Serous cystadenocarcinoma, NOS
Histone H2B type 3-B	Q8N257	126	381	0	0	Serous cystadenocarcinoma, NOS
H2A clustered histone 6	Q93077	130	393	3	0.00763359	Serous cystadenocarcinoma, NOS
H1.8 linker histone	Q8IZA3	346	1366	4	0.00292826	Serous cystadenocarcinoma, NOS
H2B clustered histone 14	Q99879	126	381	1	0.00262467	Serous cystadenocarcinoma, NOS
H3.Y histone 2	P0DPK5	147	444	0	0	Serous cystadenocarcinoma, NOS
Histone H2A type 3	Q7L7L0	130	393	1	0.00254453	Serous cystadenocarcinoma, NOS
H2A clustered histone 7	P20671	130	393	0	0	Serous cystadenocarcinoma, NOS
Histone H3-7	Q5TEC6	136	411	0	0	Serous cystadenocarcinoma, NOS
H1.7 linker histone	Q75WM6	255	768	4	0.00520833	Serous cystadenocarcinoma, NOS
H1.5 linker histone, cluster member	P16401	226	681	4	0.00587372	Serous cystadenocarcinoma, NOS
H1.4 linker histone, cluster member	P10412	219	660	7	0.0106061	Serous cystadenocarcinoma, NOS
H2A clustered histone 11	P0C0S8	130	1965	18	0.00916031	Serous cystadenocarcinoma, NOS
H3.3 histone A	P84243	136	822	2	0.00243309	Serous cystadenocarcinoma, NOS
H2B clustered histone 1	Q96A08	127	384	2	0.00520833	Serous cystadenocarcinoma, NOS
H3.5 histone	Q6NXT2	135	408	5	0.0122549	Serous cystadenocarcinoma, NOS
H3 clustered histone 1	P68431	136	4110	29	0.00705596	Serous cystadenocarcinoma, NOS
H1.2 linker histone, cluster member	P16403	213	642	7	0.0109034	Serous cystadenocarcinoma, NOS
H3 clustered histone 13	Q71DI3	136	1233	2	0.00162206	Serous cystadenocarcinoma, NOS
H1.3 linker histone, cluster member	P16402	221	666	2	0.003003	Serous cystadenocarcinoma, NOS
H2B clustered histone 12	O60814	126	381	4	0.0104987	Serous cystadenocarcinoma, NOS
H1.1 linker histone, cluster member	Q02539	215	648	5	0.00771605	Serous cystadenocarcinoma, NOS
H2A clustered histone 12	Q96KK5	128	387	0	0	Serous cystadenocarcinoma, NOS
H2A clustered histone 20	Q16777	129	390	2	0.00512821	Serous cystadenocarcinoma, NOS
H2B clustered histone 18	Q5QNW6	126	786	3	0.00381679	Serous cystadenocarcinoma, NOS
H2A clustered histone 1	Q96QV6	131	396	1	0.00252525	Serous cystadenocarcinoma, NOS
H1.6 linker histone, cluster member	P22492	207	624	2	0.00320513	Serous cystadenocarcinoma, NOS
H2B.W histone 2	P0C1H6	154	447	0	0	Serous cystadenocarcinoma, NOS
centromere protein A	P49450	140	423	1	0.00236407	Serous cystadenocarcinoma, NOS
H1.10 linker histone	Q92522	213	642	0	0	Serous cystadenocarcinoma, NOS
Histone H2B type 2-K1	A0A2R8Y619	122	369	0	0	Serous cystadenocarcinoma, NOS
H2B clustered histone 11	P06899	126	381	2	0.00524934	Serous cystadenocarcinoma, NOS
H2A.Z variant histone 2	Q71UI9	128	413	3	0.00726392	Serous cystadenocarcinoma, NOS
H1.0 linker histone	P07305	194	585	1	0.0017094	Serous cystadenocarcinoma, NOS
H2B clustered histone 15	Q99877	126	381	3	0.00787402	Serous cystadenocarcinoma, NOS
H2A clustered histone 14	Q99878	128	387	2	0.00516796	Serous cystadenocarcinoma, NOS
H2A.J histone	Q9BTM1	129	390	3	0.00769231	Serous cystadenocarcinoma, NOS
H2B clustered histone 5	P58876	126	381	3	0.00787402	Serous cystadenocarcinoma, NOS
H4 clustered histone 7	Q99525	98	297	4	0.013468	Serous cystadenocarcinoma, NOS
H2B clustered histone 13	Q99880	126	381	3	0.00787402	Serous cystadenocarcinoma, NOS
H2B clustered histone 3	P33778	126	381	2	0.00524934	Serous cystadenocarcinoma, NOS
H3.Y histone 1	P0DPK2	136	411	0	0	Serous cystadenocarcinoma, NOS
H2A.P histone	O75409	117	354	4	0.0112994	Serous cystadenocarcinoma, NOS
H2A.B variant histone 1	P0C5Y9	115	348	1	0.00287356	Serous cystadenocarcinoma, NOS
H4 clustered histone 1	P62805	103	4368	36	0.00824176	Serous cystadenocarcinoma, NOS
macroH2A.1 histone	O75367	369	1318	3	0.00227618	Serous cystadenocarcinoma, NOS
H2A.B variant histone 2	P0C5Z0	115	696	0	0	Serous cystadenocarcinoma, NOS
H3.4 histone	Q16695	136	411	2	0.00486618	Serous cystadenocarcinoma, NOS
H2B clustered histone 9	Q93079	126	381	9	0.023622	Serous cystadenocarcinoma, NOS
H2A clustered histone 4	P04908	130	786	6	0.00763359	Serous cystadenocarcinoma, NOS
macroH2A.2 histone	Q9P0M6	372	1119	6	0.00536193	Serous cystadenocarcinoma, NOS
H2B clustered histone 17	P23527	126	381	2	0.00524934	Serous cystadenocarcinoma, NOS
H2B clustered histone 21	Q16778	126	381	4	0.0104987	Serous cystadenocarcinoma, NOS
H2B.W histone 1	Q7Z2G1	175	444	2	0.0045045	Serous cystadenocarcinoma, NOS
H2A clustered histone 21	Q8IUE6	130	393	0	0	Mixed glioma
Histone H2B type F-S	P57053	126	467	0	0	Mixed glioma
H2A clustered histone 18	Q6FI13	130	786	0	0	Mixed glioma
H2A.Z variant histone 1	P0C0S5	128	387	0	0	Mixed glioma
H2A.X variant histone	P16104	143	432	0	0	Mixed glioma
H2B clustered histone 10	P62807	126	1905	1	0.000524934	Mixed glioma
Histone H2A-like 3	A0A3B3IU63	148	447	0	0	Mixed glioma
Histone H2B type 3-B	Q8N257	126	381	0	0	Mixed glioma
H2A clustered histone 6	Q93077	130	393	0	0	Mixed glioma
H1.8 linker histone	Q8IZA3	346	1366	0	0	Mixed glioma
H2B clustered histone 14	Q99879	126	381	0	0	Mixed glioma
H3.Y histone 2	P0DPK5	147	444	0	0	Mixed glioma
Histone H2A type 3	Q7L7L0	130	393	0	0	Mixed glioma
H2A clustered histone 7	P20671	130	393	0	0	Mixed glioma
Histone H3-7	Q5TEC6	136	411	0	0	Mixed glioma
H1.7 linker histone	Q75WM6	255	768	0	0	Mixed glioma
H1.5 linker histone, cluster member	P16401	226	681	0	0	Mixed glioma
H1.4 linker histone, cluster member	P10412	219	660	1	0.00151515	Mixed glioma
H2A clustered histone 11	P0C0S8	130	1965	0	0	Mixed glioma
H3.3 histone A	P84243	136	822	0	0	Mixed glioma
H2B clustered histone 1	Q96A08	127	384	0	0	Mixed glioma
H3.5 histone	Q6NXT2	135	408	0	0	Mixed glioma
H3 clustered histone 1	P68431	136	4110	1	0.000243309	Mixed glioma
H1.2 linker histone, cluster member	P16403	213	642	1	0.00155763	Mixed glioma
H3 clustered histone 13	Q71DI3	136	1233	0	0	Mixed glioma
H1.3 linker histone, cluster member	P16402	221	666	0	0	Mixed glioma
H2B clustered histone 12	O60814	126	381	0	0	Mixed glioma
H1.1 linker histone, cluster member	Q02539	215	648	0	0	Mixed glioma
H2A clustered histone 12	Q96KK5	128	387	0	0	Mixed glioma
H2A clustered histone 20	Q16777	129	390	0	0	Mixed glioma
H2B clustered histone 18	Q5QNW6	126	786	0	0	Mixed glioma
H2A clustered histone 1	Q96QV6	131	396	1	0.00252525	Mixed glioma
H1.6 linker histone, cluster member	P22492	207	624	1	0.00160256	Mixed glioma
H2B.W histone 2	P0C1H6	154	447	0	0	Mixed glioma
centromere protein A	P49450	140	423	1	0.00236407	Mixed glioma
H1.10 linker histone	Q92522	213	642	0	0	Mixed glioma
Histone H2B type 2-K1	A0A2R8Y619	122	369	0	0	Mixed glioma
H2B clustered histone 11	P06899	126	381	0	0	Mixed glioma
H2A.Z variant histone 2	Q71UI9	128	413	0	0	Mixed glioma
H1.0 linker histone	P07305	194	585	0	0	Mixed glioma
H2B clustered histone 15	Q99877	126	381	0	0	Mixed glioma
H2A clustered histone 14	Q99878	128	387	0	0	Mixed glioma
H2A.J histone	Q9BTM1	129	390	0	0	Mixed glioma
H2B clustered histone 5	P58876	126	381	0	0	Mixed glioma
H4 clustered histone 7	Q99525	98	297	1	0.003367	Mixed glioma
H2B clustered histone 13	Q99880	126	381	0	0	Mixed glioma
H2B clustered histone 3	P33778	126	381	0	0	Mixed glioma
H3.Y histone 1	P0DPK2	136	411	0	0	Mixed glioma
H2A.P histone	O75409	117	354	0	0	Mixed glioma
H2A.B variant histone 1	P0C5Y9	115	348	0	0	Mixed glioma
H4 clustered histone 1	P62805	103	4368	1	0.000228938	Mixed glioma
macroH2A.1 histone	O75367	369	1318	0	0	Mixed glioma
H2A.B variant histone 2	P0C5Z0	115	696	0	0	Mixed glioma
H3.4 histone	Q16695	136	411	0	0	Mixed glioma
H2B clustered histone 9	Q93079	126	381	0	0	Mixed glioma
H2A clustered histone 4	P04908	130	786	0	0	Mixed glioma
macroH2A.2 histone	Q9P0M6	372	1119	0	0	Mixed glioma
H2B clustered histone 17	P23527	126	381	0	0	Mixed glioma
H2B clustered histone 21	Q16778	126	381	0	0	Mixed glioma
H2B.W histone 1	Q7Z2G1	175	444	0	0	Mixed glioma
H2A clustered histone 21	Q8IUE6	130	393	0	0	Thymoma, type B1, malignant
Histone H2B type F-S	P57053	126	467	0	0	Thymoma, type B1, malignant
H2A clustered histone 18	Q6FI13	130	786	0	0	Thymoma, type B1, malignant
H2A.Z variant histone 1	P0C0S5	128	387	0	0	Thymoma, type B1, malignant
H2A.X variant histone	P16104	143	432	0	0	Thymoma, type B1, malignant
H2B clustered histone 10	P62807	126	1905	0	0	Thymoma, type B1, malignant
Histone H2A-like 3	A0A3B3IU63	148	447	0	0	Thymoma, type B1, malignant
Histone H2B type 3-B	Q8N257	126	381	0	0	Thymoma, type B1, malignant
H2A clustered histone 6	Q93077	130	393	0	0	Thymoma, type B1, malignant
H1.8 linker histone	Q8IZA3	346	1366	0	0	Thymoma, type B1, malignant
H2B clustered histone 14	Q99879	126	381	0	0	Thymoma, type B1, malignant
H3.Y histone 2	P0DPK5	147	444	0	0	Thymoma, type B1, malignant
Histone H2A type 3	Q7L7L0	130	393	0	0	Thymoma, type B1, malignant
H2A clustered histone 7	P20671	130	393	0	0	Thymoma, type B1, malignant
Histone H3-7	Q5TEC6	136	411	0	0	Thymoma, type B1, malignant
H1.7 linker histone	Q75WM6	255	768	0	0	Thymoma, type B1, malignant
H1.5 linker histone, cluster member	P16401	226	681	0	0	Thymoma, type B1, malignant
H1.4 linker histone, cluster member	P10412	219	660	0	0	Thymoma, type B1, malignant
H2A clustered histone 11	P0C0S8	130	1965	0	0	Thymoma, type B1, malignant
H3.3 histone A	P84243	136	822	0	0	Thymoma, type B1, malignant
H2B clustered histone 1	Q96A08	127	384	0	0	Thymoma, type B1, malignant
H3.5 histone	Q6NXT2	135	408	0	0	Thymoma, type B1, malignant
H3 clustered histone 1	P68431	136	4110	0	0	Thymoma, type B1, malignant
H1.2 linker histone, cluster member	P16403	213	642	0	0	Thymoma, type B1, malignant
H3 clustered histone 13	Q71DI3	136	1233	0	0	Thymoma, type B1, malignant
H1.3 linker histone, cluster member	P16402	221	666	0	0	Thymoma, type B1, malignant
H2B clustered histone 12	O60814	126	381	0	0	Thymoma, type B1, malignant
H1.1 linker histone, cluster member	Q02539	215	648	0	0	Thymoma, type B1, malignant
H2A clustered histone 12	Q96KK5	128	387	0	0	Thymoma, type B1, malignant
H2A clustered histone 20	Q16777	129	390	0	0	Thymoma, type B1, malignant
H2B clustered histone 18	Q5QNW6	126	786	0	0	Thymoma, type B1, malignant
H2A clustered histone 1	Q96QV6	131	396	0	0	Thymoma, type B1, malignant
H1.6 linker histone, cluster member	P22492	207	624	0	0	Thymoma, type B1, malignant
H2B.W histone 2	P0C1H6	154	447	0	0	Thymoma, type B1, malignant
centromere protein A	P49450	140	423	0	0	Thymoma, type B1, malignant
H1.10 linker histone	Q92522	213	642	0	0	Thymoma, type B1, malignant
Histone H2B type 2-K1	A0A2R8Y619	122	369	0	0	Thymoma, type B1, malignant
H2B clustered histone 11	P06899	126	381	0	0	Thymoma, type B1, malignant
H2A.Z variant histone 2	Q71UI9	128	413	0	0	Thymoma, type B1, malignant
H1.0 linker histone	P07305	194	585	0	0	Thymoma, type B1, malignant
H2B clustered histone 15	Q99877	126	381	0	0	Thymoma, type B1, malignant
H2A clustered histone 14	Q99878	128	387	0	0	Thymoma, type B1, malignant
H2A.J histone	Q9BTM1	129	390	0	0	Thymoma, type B1, malignant
H2B clustered histone 5	P58876	126	381	0	0	Thymoma, type B1, malignant
H4 clustered histone 7	Q99525	98	297	0	0	Thymoma, type B1, malignant
H2B clustered histone 13	Q99880	126	381	0	0	Thymoma, type B1, malignant
H2B clustered histone 3	P33778	126	381	0	0	Thymoma, type B1, malignant
H3.Y histone 1	P0DPK2	136	411	0	0	Thymoma, type B1, malignant
H2A.P histone	O75409	117	354	0	0	Thymoma, type B1, malignant
H2A.B variant histone 1	P0C5Y9	115	348	0	0	Thymoma, type B1, malignant
H4 clustered histone 1	P62805	103	4368	0	0	Thymoma, type B1, malignant
macroH2A.1 histone	O75367	369	1318	0	0	Thymoma, type B1, malignant
H2A.B variant histone 2	P0C5Z0	115	696	0	0	Thymoma, type B1, malignant
H3.4 histone	Q16695	136	411	0	0	Thymoma, type B1, malignant
H2B clustered histone 9	Q93079	126	381	0	0	Thymoma, type B1, malignant
H2A clustered histone 4	P04908	130	786	0	0	Thymoma, type B1, malignant
macroH2A.2 histone	Q9P0M6	372	1119	0	0	Thymoma, type B1, malignant
H2B clustered histone 17	P23527	126	381	0	0	Thymoma, type B1, malignant
H2B clustered histone 21	Q16778	126	381	0	0	Thymoma, type B1, malignant
H2B.W histone 1	Q7Z2G1	175	444	0	0	Thymoma, type B1, malignant
H2A clustered histone 21	Q8IUE6	130	393	0	0	Thymic carcinoma, NOS
Histone H2B type F-S	P57053	126	467	0	0	Thymic carcinoma, NOS
H2A clustered histone 18	Q6FI13	130	786	0	0	Thymic carcinoma, NOS
H2A.Z variant histone 1	P0C0S5	128	387	0	0	Thymic carcinoma, NOS
H2A.X variant histone	P16104	143	432	0	0	Thymic carcinoma, NOS
H2B clustered histone 10	P62807	126	1905	0	0	Thymic carcinoma, NOS
Histone H2A-like 3	A0A3B3IU63	148	447	0	0	Thymic carcinoma, NOS
Histone H2B type 3-B	Q8N257	126	381	0	0	Thymic carcinoma, NOS
H2A clustered histone 6	Q93077	130	393	0	0	Thymic carcinoma, NOS
H1.8 linker histone	Q8IZA3	346	1366	0	0	Thymic carcinoma, NOS
H2B clustered histone 14	Q99879	126	381	0	0	Thymic carcinoma, NOS
H3.Y histone 2	P0DPK5	147	444	0	0	Thymic carcinoma, NOS
Histone H2A type 3	Q7L7L0	130	393	1	0.00254453	Thymic carcinoma, NOS
H2A clustered histone 7	P20671	130	393	0	0	Thymic carcinoma, NOS
Histone H3-7	Q5TEC6	136	411	0	0	Thymic carcinoma, NOS
H1.7 linker histone	Q75WM6	255	768	0	0	Thymic carcinoma, NOS
H1.5 linker histone, cluster member	P16401	226	681	0	0	Thymic carcinoma, NOS
H1.4 linker histone, cluster member	P10412	219	660	0	0	Thymic carcinoma, NOS
H2A clustered histone 11	P0C0S8	130	1965	0	0	Thymic carcinoma, NOS
H3.3 histone A	P84243	136	822	0	0	Thymic carcinoma, NOS
H2B clustered histone 1	Q96A08	127	384	0	0	Thymic carcinoma, NOS
H3.5 histone	Q6NXT2	135	408	0	0	Thymic carcinoma, NOS
H3 clustered histone 1	P68431	136	4110	0	0	Thymic carcinoma, NOS
H1.2 linker histone, cluster member	P16403	213	642	0	0	Thymic carcinoma, NOS
H3 clustered histone 13	Q71DI3	136	1233	0	0	Thymic carcinoma, NOS
H1.3 linker histone, cluster member	P16402	221	666	0	0	Thymic carcinoma, NOS
H2B clustered histone 12	O60814	126	381	0	0	Thymic carcinoma, NOS
H1.1 linker histone, cluster member	Q02539	215	648	0	0	Thymic carcinoma, NOS
H2A clustered histone 12	Q96KK5	128	387	0	0	Thymic carcinoma, NOS
H2A clustered histone 20	Q16777	129	390	0	0	Thymic carcinoma, NOS
H2B clustered histone 18	Q5QNW6	126	786	0	0	Thymic carcinoma, NOS
H2A clustered histone 1	Q96QV6	131	396	0	0	Thymic carcinoma, NOS
H1.6 linker histone, cluster member	P22492	207	624	0	0	Thymic carcinoma, NOS
H2B.W histone 2	P0C1H6	154	447	0	0	Thymic carcinoma, NOS
centromere protein A	P49450	140	423	0	0	Thymic carcinoma, NOS
H1.10 linker histone	Q92522	213	642	0	0	Thymic carcinoma, NOS
Histone H2B type 2-K1	A0A2R8Y619	122	369	0	0	Thymic carcinoma, NOS
H2B clustered histone 11	P06899	126	381	0	0	Thymic carcinoma, NOS
H2A.Z variant histone 2	Q71UI9	128	413	0	0	Thymic carcinoma, NOS
H1.0 linker histone	P07305	194	585	0	0	Thymic carcinoma, NOS
H2B clustered histone 15	Q99877	126	381	0	0	Thymic carcinoma, NOS
H2A clustered histone 14	Q99878	128	387	0	0	Thymic carcinoma, NOS
H2A.J histone	Q9BTM1	129	390	0	0	Thymic carcinoma, NOS
H2B clustered histone 5	P58876	126	381	0	0	Thymic carcinoma, NOS
H4 clustered histone 7	Q99525	98	297	0	0	Thymic carcinoma, NOS
H2B clustered histone 13	Q99880	126	381	0	0	Thymic carcinoma, NOS
H2B clustered histone 3	P33778	126	381	1	0.00262467	Thymic carcinoma, NOS
H3.Y histone 1	P0DPK2	136	411	0	0	Thymic carcinoma, NOS
H2A.P histone	O75409	117	354	0	0	Thymic carcinoma, NOS
H2A.B variant histone 1	P0C5Y9	115	348	0	0	Thymic carcinoma, NOS
H4 clustered histone 1	P62805	103	4368	1	0.000228938	Thymic carcinoma, NOS
macroH2A.1 histone	O75367	369	1318	0	0	Thymic carcinoma, NOS
H2A.B variant histone 2	P0C5Z0	115	696	0	0	Thymic carcinoma, NOS
H3.4 histone	Q16695	136	411	0	0	Thymic carcinoma, NOS
H2B clustered histone 9	Q93079	126	381	0	0	Thymic carcinoma, NOS
H2A clustered histone 4	P04908	130	786	0	0	Thymic carcinoma, NOS
macroH2A.2 histone	Q9P0M6	372	1119	0	0	Thymic carcinoma, NOS
H2B clustered histone 17	P23527	126	381	0	0	Thymic carcinoma, NOS
H2B clustered histone 21	Q16778	126	381	0	0	Thymic carcinoma, NOS
H2B.W histone 1	Q7Z2G1	175	444	0	0	Thymic carcinoma, NOS
H2A clustered histone 21	Q8IUE6	130	393	16	0.0407125	Squamous cell carcinoma, NOS
Histone H2B type F-S	P57053	126	467	0	0	Squamous cell carcinoma, NOS
H2A clustered histone 18	Q6FI13	130	786	0	0	Squamous cell carcinoma, NOS
H2A.Z variant histone 1	P0C0S5	128	387	4	0.0103359	Squamous cell carcinoma, NOS
H2A.X variant histone	P16104	143	432	5	0.0115741	Squamous cell carcinoma, NOS
H2B clustered histone 10	P62807	126	1905	54	0.0283465	Squamous cell carcinoma, NOS
Histone H2A-like 3	A0A3B3IU63	148	447	0	0	Squamous cell carcinoma, NOS
Histone H2B type 3-B	Q8N257	126	381	6	0.015748	Squamous cell carcinoma, NOS
H2A clustered histone 6	Q93077	130	393	11	0.0279898	Squamous cell carcinoma, NOS
H1.8 linker histone	Q8IZA3	346	1366	8	0.00585652	Squamous cell carcinoma, NOS
H2B clustered histone 14	Q99879	126	381	10	0.0262467	Squamous cell carcinoma, NOS
H3.Y histone 2	P0DPK5	147	444	0	0	Squamous cell carcinoma, NOS
Histone H2A type 3	Q7L7L0	130	393	7	0.0178117	Squamous cell carcinoma, NOS
H2A clustered histone 7	P20671	130	393	0	0	Squamous cell carcinoma, NOS
Histone H3-7	Q5TEC6	136	411	0	0	Squamous cell carcinoma, NOS
H1.7 linker histone	Q75WM6	255	768	6	0.0078125	Squamous cell carcinoma, NOS
H1.5 linker histone, cluster member	P16401	226	681	17	0.0249633	Squamous cell carcinoma, NOS
H1.4 linker histone, cluster member	P10412	219	660	16	0.0242424	Squamous cell carcinoma, NOS
[truncated: 2,142 more rows]

## Sheet: Table S4
Supplementary Table S4. Chromosome location, replication timing, and Hi-C statistics of histone genes
protein	type	uniprot_acc	expr	reptime	hic	approved	chromosome	pancancer_mutation_rate	type
centromere protein A	H3	p49450	1334693	378	40	CENPA	chr2	0.0661939	Variant
H1.0 linker histone	H1	p07305	1385064	203	66	H1-0	chr22	0.0632479	Variant
H1.1 linker histone, cluster member	H1	q02539	408919	685	43	H1-1	chr6	0.103395	Canonical
H1.10 linker histone	H1	q92522	948414	355	44	H1-10	chr3	0.0389408	Variant
H1.2 linker histone, cluster member	H1	p16403	408919	685	43	H1-2	chr6	0.219626	Canonical
H1.3 linker histone, cluster member	H1	p16402	390169	544	57	H1-3	chr6	0.163664	Canonical
H1.4 linker histone, cluster member	H1	p10412	398813	636	53	H1-4	chr6	0.239394	Canonical
H1.5 linker histone, cluster member	H1	p16401	228884	634	40	H1-5	chr6	0.201175	Canonical
H1.6 linker histone, cluster member	H1	p22492	398813	636	53	H1-6	chr6	0.099359	Canonical
H1.7 linker histone	H1	q75wm6	809696	412	16	H1-7	chr12	0.108073	Variant
H1.8 linker histone	H1	q8iza3	779764	210	59	H1-8	chr3	0.0446559	Variant
H2A clustered histone 1	H2A	q96qv6	272695	635	29	H2AC1	chr6	0.194444	Variant
H2A clustered histone 11	H2A	p0c0s8	227588	622	29	H2AC11	chr6	0.198473	Canonical
H2A clustered histone 12	H2A	q96kk5	227588	622	29	H2AC12	chr6	0.139535	Canonical
H2A clustered histone 13	H2A	p0c0s8	267617	634	32	H2AC13	chr6	0.109415	Canonical
H2A clustered histone 14	H2A	q99878	267617	634	32	H2AC14	chr6	0.131783	Canonical
H2A clustered histone 15	H2A	p0c0s8	228884	634	40	H2AC15	chr6	0.139949	Canonical
H2A clustered histone 16	H2A	p0c0s8	228884	634	40	H2AC16	chr6	0.114504	Canonical
H2A clustered histone 17	H2A	p0c0s8	228884	634	40	H2AC17	chr6	0.167939	Canonical
H2A clustered histone 20	H2A	q16777	798975	560	17	H2AC20	chr1	0.225641	Canonical
H2A clustered histone 21	H2A	q8iue6	798975	560	17	H2AC21	chr1	0.13486	Canonical
H2A.W histone	H2A	q7l7l0	626588	351	7	H2AC25	chr1	0.0916031	Variant
H2A clustered histone 4	H2A	p04908	408919	685	43	H2AC4	chr6	0.129771	Canonical
H2A clustered histone 6	H2A	q93077	398813	636	53	H2AC6	chr6	0.16285	Canonical
H2A clustered histone 8	H2A	p04908	390169	544	57	H2AC8	chr6	0.185751	Canonical
H2A.J histone	H2A	q9btm1	340728	578	-4	H2AJ	chr12	0.0717949	Variant
H2A.X variant histone	H2A	p16104	1390854	195	58	H2AX	chr11	0.0763889	Variant
H2A.Z variant histone 1	H2A	p0c0s5	202808	682	36	H2AZ1	chr4	0.0775194	Variant
H2A.Z variant histone 2	H2A	q71ui9	1200579	164	55	H2AZ2	chr7	0.0750605	Variant
H2B clustered histone 1	H2B	q96a08	272695	635	29	H2BC1	chr6	0.127604	Variant
H2B clustered histone 10	H2B	p62807	390169	544	57	H2BC10	chr6	0.141732	Canonical
H2B clustered histone 11	H2B	p06899	227588	622	29	H2BC11	chr6	0.136483	Canonical
H2B clustered histone 12	H2B	o60814	227588	622	29	H2BC12	chr6	0.175853	Canonical
H2B clustered histone 13	H2B	q99880	267617	634	32	H2BC13	chr6	0.12336	Canonical
H2B clustered histone 14	H2B	q99879	267617	634	32	H2BC14	chr6	0.173228	Canonical
H2B clustered histone 15	H2B	q99877	228884	634	40	H2BC15	chr6	0.104987	Canonical
H2B clustered histone 17	H2B	p23527	228884	634	40	H2BC17	chr6	0.112861	Canonical
H2B clustered histone 18	H2B	q5qnw6	462959	519	19	H2BC18	chr1	0.0636132	Canonical
H2B clustered histone 21	H2B	q16778	798975	560	17	H2BC21	chr1	0.186352	Canonical
H2B.U histone 1	H2B	q8n257	626588	351	7	H2BC26	chr1	0.0813648	Canonical
H2B clustered histone 3	H2B	p33778	408919	685	43	H2BC3	chr6	0.141732	Canonical
H2B clustered histone 4	H2B	p62807	398813	636	53	H2BC4	chr6	0.23622	Canonical
H2B clustered histone 5	H2B	p58876	398813	636	53	H2BC5	chr6	0.170604	Canonical
H2B clustered histone 6	H2B	p62807	398813	636	53	H2BC6	chr6	0.0997375	Canonical
H2B clustered histone 7	H2B	p62807	394491	544	55	H2BC7	chr6	0.170604	Canonical
H2B clustered histone 8	H2B	p62807	390169	544	57	H2BC8	chr6	0.175853	Canonical
H2B clustered histone 9	H2B	q93079	390169	544	57	H2BC9	chr6	0.2021	Canonical
H3.3 histone A	H3	p84243	866965	237	23	H3-3A	chr1	0.109489	Variant
H3.3 histone B	H3	p84243	1885370	198	27	H3-3B	chr17	0.104623	Variant
H3.4 histone	H3	q16695	626588	351	7	H3-4	chr1	0.128954	Variant
H3.5 histone	H3	q6nxt2	271605	394	20	H3-5	chr12	0.188725	Variant
H3 clustered histone 1	H3	p68431	408919	685	43	H3C1	chr6	0.0608273	Canonical
H3 clustered histone 10	H3	p68431	267617	634	32	H3C10	chr6	0.107056	Canonical
H3 clustered histone 11	H3	p68431	228884	634	40	H3C11	chr6	0.221411	Canonical
H3 clustered histone 12	H3	p68431	228884	634	40	H3C12	chr6	0.114355	Canonical
H3 clustered histone 13	H3	q71di3	681585	560	28	H3C13	chr1	0.143552	Canonical
H3 clustered histone 2	H3	p68431	408919	685	43	H3C2	chr6	0.287105	Canonical
H3 clustered histone 3	H3	p68431	408919	685	43	H3C3	chr6	0.221411	Canonical
H3 clustered histone 4	H3	p68431	398813	636	53	H3C4	chr6	0.172749	Canonical
H3 clustered histone 6	H3	p68431	390169	544	57	H3C6	chr6	0.163017	Canonical
H3 clustered histone 7	H3	p68431	390169	544	57	H3C7	chr6	0.16545	Canonical
H3 clustered histone 8	H3	p68431	390169	544	57	H3C8	chr6	0.184915	Canonical
H4 clustered histone 1	H4	p62805	408919	685	43	H4C1	chr6	0.0480769	Canonical
H4 clustered histone 11	H4	p62805	267617	634	32	H4C11	chr6	0.160256	Canonical
H4 clustered histone 12	H4	p62805	267617	634	32	H4C12	chr6	0.205128	Canonical
H4 clustered histone 13	H4	p62805	228884	634	40	H4C13	chr6	0.13141	Canonical
H4 histone 16	H4	p62805	340728	578	-4	H4C16	chr12	0.125	Canonical
H4 clustered histone 2	H4	p62805	408919	685	43	H4C2	chr6	0.179487	Canonical
H4 clustered histone 3	H4	p62805	398813	636	53	H4C3	chr6	0.153846	Canonical
H4 clustered histone 4	H4	p62805	398813	636	53	H4C4	chr6	0.185897	Canonical
H4 clustered histone 5	H4	p62805	390169	544	57	H4C5	chr6	0.221154	Canonical
H4 clustered histone 6	H4	p62805	390169	544	57	H4C6	chr6	0.157051	Canonical
H4 clustered histone 7	H4	q99525	390169	544	57	H4C7	chr6	0.20202	Canonical
H4 clustered histone 8	H4	p62805	390169	544	57	H4C8	chr6	0.13141	Canonical
H4 clustered histone 9	H4	p62805	227588	622	29	H4C9	chr6	0.211538	Canonical
macroH2A.1 histone	H2A	o75367	583238	414	41	MACROH2A1	chr5	0.0675266	Variant
macroH2A.2 histone	H2A	q9p0m6	484729	425	25	MACROH2A2	chr10	0.0965147	Variant

## Sheet: Table S5
Supplementary Table S5. Mann-Whitney U results of histone versus non-histone protein mutation rates
primary_diagnosis	histone_rate_mean	non_histone_rate_mean	mean_rate_ratio	p	q
Malignant lymphoma, large B-cell, diffuse	0.00284624	0.000177725	16.0148	3.88e-11	2.68e-09
Squamous cell carcinoma	0.0170525	0.00875072	1.9487	3.09e-07	1.07e-05
Transitional cell carcinoma	0.00644932	0.00268625	2.40087	2.32e-06	5.33e-05
Pancancer	0.109693	0.0764008	1.43576	6.92e-06	0.000119322
Infiltrating duct carcinoma	0.00640674	0.00297301	2.15497	1.78e-05	0.000246092
Multiple myeloma	0.00779826	0.00208043	3.74839	0.000619096	0.0071196
Astrocytoma, anaplastic	0.0003376	0.000494765	0.682343	0.000775523	0.00764444
Spindle cell melanoma	5.61e-05	0.000133917	0.419041	0.00127422	0.00976901
Renal cell carcinoma	0.000110015	0.000262107	0.419733	0.00120809	0.00976901
Serous cystadenocarcinoma	0.00501018	0.00316025	1.58537	0.00298738	0.0180542
Glioblastoma	0.0014196	0.00171931	0.825681	0.00313986	0.0180542
Nodular melanoma	0.000200819	0.000319447	0.628646	0.00279239	0.0180542
Adenocarcinoma	0.0174748	0.013995	1.24865	0.00658208	0.0349357
Embryonal carcinoma	9.32e-05	1.06e-05	8.79946	0.00964237	0.0475231
Malignant melanoma	0.00666947	0.0083205	0.801572	0.0114038	0.0524575
Undifferentiated sarcoma	3.36e-05	0.000107228	0.313607	0.0234813	0.101263
Fibromyxosarcoma	4.78e-05	7.58e-05	0.630799	0.0414247	0.158795
Epithelioid cell melanoma	0.000150245	0.000174922	0.858924	0.0406171	0.158795
Squamous cell carcinoma, keratinizing	0.00108756	0.000405472	2.68221	0.0466346	0.169357
Acute myeloid leukemia	0.000100552	0.000106074	0.947942	0.0645667	0.222755
Cholangiocarcinoma	0.000151988	0.000138494	1.09743	0.0763129	0.250742
Clear cell adenocarcinoma	0.000674478	0.000585487	1.15199	0.108076	0.338967
Oligodendroglioma	0.000160135	0.000148457	1.07866	0.125448	0.346342
Mullerian mixed tumor	0.000321827	0.00021447	1.50057	0.125486	0.346342
Pheochromocytoma, malignant	7.87e-05	1.22e-05	6.45644	0.122464	0.346342
Squamous cell carcinoma, large cell, nonkeratinizing	0.000520198	0.000319635	1.62748	0.156847	0.416248
Adenocarcinoma, endocervical type	0.000103275	9.9e-05	1.04337	0.177923	0.454693
Leiomyosarcoma	0.00015229	0.000146986	1.03609	0.203665	0.475689
Mucinous adenocarcinoma	0.0020991	0.00206105	1.01846	0.202778	0.475689
Endometrioid adenocarcinoma	0.0152334	0.0162501	0.937438	0.206821	0.475689
Infiltrating duct and lobular carcinoma	2.5e-05	3.08e-05	0.812642	0.228412	0.508402
Adenocarcinoma, intestinal type	0.0018981	0.00101436	1.87123	0.259104	0.525828
Papillary transitional cell carcinoma	0.000902589	0.000441718	2.04336	0.258198	0.525828
Serous adenocarcinoma	0.000706886	0.000483076	1.4633	0.258987	0.525828
Thymoma, type AB, malignant	0	1.03e-05	0	0.28158	0.550034
Acinar cell carcinoma	0.000254214	0.000165349	1.53744	0.286974	0.550034
Metaplastic carcinoma	9.39e-05	2.58e-05	3.63551	0.333593	0.622106
Dedifferentiated liposarcoma	6.99e-05	5.54e-05	1.26052	0.354624	0.643923
Adrenal cortical carcinoma	0.000354092	0.000214016	1.65451	0.369083	0.652993
Bronchiolo-alveolar carcinoma, non-mucinous	0.000169198	0.000103211	1.63935	0.432663	0.703247
Carcinosarcoma	4.95e-05	1.86e-05	2.65846	0.421346	0.703247
Thymoma, type B2, malignant	4.24e-05	4.49e-06	9.45452	0.412169	0.703247
Infiltrating duct mixed with other types of carcinoma	3.75e-05	2.1e-05	1.78415	0.445262	0.703247
Epithelioid mesothelioma, malignant	0.000164105	4.76e-05	3.44863	0.448448	0.703247
Basaloid squamous cell carcinoma	0.000449677	0.000252337	1.78205	0.474372	0.727371
Signet ring cell carcinoma	0.000181162	9.88e-05	1.83427	0.559436	0.839153
Thymoma, type B3, malignant	2.03e-05	5.4e-06	3.75283	0.597744	0.865652
Mixed epithelioid and spindle cell melanoma	4.31e-05	1.85e-05	2.32177	0.602193	0.865652
Papillary adenocarcinoma	0.00133312	0.000835514	1.59557	0.660494	0.88234
Seminoma	2.06e-05	2.75e-05	0.750878	0.65533	0.88234
Tubular adenocarcinoma	0.00122998	0.00090147	1.36442	0.67774	0.88234
Mixed germ cell tumor	3.82e-06	1.32e-05	0.289404	0.672782	0.88234
Carcinoma, diffuse type	0.000866362	0.000527842	1.64133	0.669999	0.88234
Thymoma, type B1, malignant	0	1.41e-06	0	0.708224	0.904953
Papillary carcinoma, columnar cell	6.38e-05	1.63e-05	3.92673	0.72439	0.90878
Infiltrating lobular carcinoma	2.03e-05	1.36e-05	1.49498	0.743655	0.916289
Lobular carcinoma	0.000707075	0.00037322	1.89452	0.872468	0.918354
Mucinous adenocarcinoma, endocervical type	7.65e-05	4.62e-05	1.65551	0.818017	0.918354
Papillary carcinoma, follicular variant	5.61e-05	3.15e-05	1.7805	0.832128	0.918354
Malignant fibrous histiocytoma	9.53e-05	3.87e-05	2.46323	0.878425	0.918354
Astrocytoma	0.000177336	4.17e-05	4.25074	0.82585	0.918354
Mixed glioma	0.000232148	0.000112438	2.06468	0.864334	0.918354
Oligodendroglioma, anaplastic	0.000158625	7.8e-05	2.03317	0.848545	0.918354
Hepatocellular carcinoma	0.00171002	0.00118444	1.44373	0.774229	0.918354
Renal cell carcinoma, chromophobe type	0.000154861	6e-05	2.58231	0.776387	0.918354
Thymoma, type A, malignant	4.37e-05	7.88e-06	5.55441	0.817985	0.918354
Adenocarcinoma with mixed subtypes	0.00160769	0.00116478	1.38026	0.936619	0.964577
Mesothelioma, biphasic, malignant	3e-05	1.87e-05	1.60638	0.972061	0.986356
Thymic carcinoma	9e-05	2.84e-05	3.1654	0.991035	0.991035

## Sheet: Table S6
Supplementary Table S6. Mann-Whitney U results of histone versus non-histone cancer driver protein mutation rates
primary_diagnosis	histone_rate_mean	driver_rate_mean	mean_rate_ratio	p	q
Astrocytoma, anaplastic	0.0003376	0.00080631	0.418697	4.67e-07	3.22e-05
Renal cell carcinoma	0.000110015	0.000452613	0.243066	1.73e-05	0.000434
Squamous cell carcinoma	0.0170525	0.0111242	1.53291	1.89e-05	0.000434
Spindle cell melanoma	5.61e-05	0.000145768	0.384972	0.000106247	0.001488
Glioblastoma	0.0014196	0.00243544	0.582893	0.000107834	0.001488
Cholangiocarcinoma	0.000151988	0.000239296	0.635147	0.000284825	0.002808
Nodular melanoma	0.000200819	0.000304143	0.660278	0.000279538	0.002808
Acute myeloid leukemia	0.000100552	0.000233332	0.43094	0.00034133	0.002944
Oligodendroglioma	0.000160135	0.000417334	0.38371	0.000618931	0.004745
Transitional cell carcinoma	0.00644932	0.00371233	1.73727	0.001017	0.007017
Squamous cell carcinoma, large cell, nonkeratinizing	0.000520198	0.000436922	1.1906	0.00125299	0.00786
Malignant lymphoma, large B-cell, diffuse	0.00284624	0.000610981	4.65847	0.00137438	0.007903
Clear cell adenocarcinoma	0.000674478	0.00108287	0.622862	0.00169204	0.008981
Malignant melanoma	0.00666947	0.00825439	0.807991	0.00235715	0.011617
Mullerian mixed tumor	0.000321827	0.00035427	0.908423	0.00276812	0.012007
Pancancer	0.109693	0.101123	1.08475	0.00278423	0.012007
Epithelioid cell melanoma	0.000150245	0.000201008	0.747456	0.0038734	0.014848
Undifferentiated sarcoma	3.36e-05	0.000110754	0.303621	0.0036908	0.014848
Infiltrating duct carcinoma	0.00640674	0.0052227	1.22671	0.0051242	0.018609
Adenocarcinoma, endocervical type	0.000103275	0.000129101	0.799957	0.00888244	0.030644
Mucinous adenocarcinoma	0.0020991	0.00268487	0.781824	0.00948449	0.031163
Endometrioid adenocarcinoma	0.0152334	0.0198563	0.767185	0.0118151	0.037057
Fibromyxosarcoma	4.78e-05	7.79e-05	0.613904	0.0127141	0.038142
Serous adenocarcinoma	0.000706886	0.00061442	1.15049	0.0134828	0.038763
Acinar cell carcinoma	0.000254214	0.000197996	1.28393	0.0206105	0.056885
Infiltrating duct and lobular carcinoma	2.5e-05	6.65e-05	0.376095	0.0239771	0.063632
Multiple myeloma	0.00779826	0.00430984	1.80941	0.0264241	0.067528
Signet ring cell carcinoma	0.000181162	0.000134197	1.34997	0.0320054	0.078871
Leiomyosarcoma	0.00015229	0.000212293	0.717361	0.0344882	0.082058
Adrenal cortical carcinoma	0.000354092	0.000261076	1.35628	0.0383632	0.088235
Carcinoma, diffuse type	0.000866362	0.000718773	1.20533	0.0469485	0.104498
Lobular carcinoma	0.000707075	0.00063823	1.10787	0.0643679	0.129511
Basaloid squamous cell carcinoma	0.000449677	0.000289753	1.55193	0.0656938	0.129511
Serous cystadenocarcinoma	0.00501018	0.00410978	1.21909	0.0641024	0.129511
Oligodendroglioma, anaplastic	0.000158625	0.000247581	0.640698	0.0634303	0.129511
Tubular adenocarcinoma	0.00122998	0.00114772	1.07168	0.0893297	0.171215
Bronchiolo-alveolar carcinoma, non-mucinous	0.000169198	0.000124612	1.3578	0.105564	0.196862
Seminoma	2.06e-05	9.88e-05	0.208914	0.118135	0.214508
Astrocytoma	0.000177336	0.000195275	0.908133	0.139242	0.246351
Mixed glioma	0.000232148	0.000421754	0.550434	0.14647	0.25266
Adenocarcinoma	0.0174748	0.0184279	0.948277	0.150711	0.253635
Renal cell carcinoma, chromophobe type	0.000154861	9.91e-05	1.56201	0.156629	0.257319
Infiltrating duct mixed with other types of carcinoma	3.75e-05	3.49e-05	1.07522	0.162207	0.260286
Dedifferentiated liposarcoma	6.99e-05	4.65e-05	1.50183	0.173031	0.264316
Thymoma, type AB, malignant	0	1.74e-05	0	0.173932	0.264316
Hepatocellular carcinoma	0.00171002	0.00152677	1.12002	0.179999	0.264316
Embryonal carcinoma	9.32e-05	1.33e-05	7.00811	0.180041	0.264316
Mixed epithelioid and spindle cell melanoma	4.31e-05	8.16e-05	0.528002	0.211571	0.304133
Epithelioid mesothelioma, malignant	0.000164105	0.000110052	1.49116	0.245626	0.345881
Mucinous adenocarcinoma, endocervical type	7.65e-05	6.52e-05	1.17279	0.290652	0.393861
Thymic carcinoma	9e-05	4.1e-05	2.19383	0.291114	0.393861
Papillary adenocarcinoma	0.00133312	0.00132627	1.00517	0.324534	0.422507
Infiltrating lobular carcinoma	2.03e-05	2.65e-05	0.765561	0.318947	0.422507
Papillary carcinoma, follicular variant	5.61e-05	0.000159335	0.352104	0.333785	0.426503
Thymoma, type A, malignant	4.37e-05	3.3e-05	1.32703	0.345398	0.433318
Papillary transitional cell carcinoma	0.000902589	0.000650567	1.38739	0.362538	0.446699
Mesothelioma, biphasic, malignant	3e-05	3.63e-05	0.825869	0.378014	0.457596
Mixed germ cell tumor	3.82e-06	1.41e-05	0.271304	0.384759	0.457731
Adenocarcinoma with mixed subtypes	0.00160769	0.00135344	1.18786	0.414457	0.484704
Metaplastic carcinoma	9.39e-05	5.44e-05	1.72627	0.598928	0.685732
Carcinosarcoma	4.95e-05	4.26e-05	1.1619	0.606227	0.685732
Squamous cell carcinoma, keratinizing	0.00108756	0.000588452	1.84818	0.632983	0.704449
Thymoma, type B1, malignant	0	1.03e-06	0	0.647396	0.709053
Malignant fibrous histiocytoma	9.53e-05	3.61e-05	2.63916	0.685154	0.731826
Papillary carcinoma, columnar cell	6.38e-05	3.71e-05	1.71862	0.689401	0.731826
Thymoma, type B3, malignant	2.03e-05	1e-05	2.02246	0.712326	0.744705
Thymoma, type B2, malignant	4.24e-05	8.34e-06	5.0875	0.829008	0.853754
Pheochromocytoma, malignant	7.87e-05	3.28e-05	2.40199	0.930631	0.944317
Adenocarcinoma, intestinal type	0.0018981	0.00134341	1.4129	0.944546	0.944546

## Sheet: Table S7
Supplementary Table S7. List of histone genes and their q-values obtained by MutSig2CV
rank	gene	longname	codelen	nnei	nncd	nsil	nmis	nstp	nspl	nind	nnon	npat	nsite	pCV	pCL	pFN	p	q	updated gene symbols	cancer type
114	HIST1H1E	histone cluster 1, H1e	664	4	0	3	29	0	0	2	31	30	25	8.92986e-06	0.071	0.89	1.41997e-05	0.00234942	H1-4	Multiple myeloma
47	HIST1H2AL	histone cluster 1, H2al	397	4	0	2	6	3	0	0	9	9	6	9.11932e-06			9.11932e-06	0.00361637	H2AC16	Squamous cell carcinoma, NOS
63	H1FOO	H1 histone family, member O, oocyte-specific	1061	36	0	0	8	2	0	0	10	10	10	1.9881e-05			1.9881e-05	0.00595232	H1-8	Squamous cell carcinoma, NOS
75	HIST1H1B	histone cluster 1, H1b	685	10	0	2	8	0	0	1	9	9	8	3.63614e-05			3.63614e-05	0.00914465	H1-5	Squamous cell carcinoma, NOS
432	HIST1H2AL	histone cluster 1, H2al	397	14	0	0	4	2	0	0	6	6	5	0.0011207			0.0011207	0.048899	H2AC16	Adenocarcinoma, NOS
231	HIST1H4D	histone cluster 1, H4d	314	15	0	0	3	0	0	2	5	5	5	7.18198e-05	1	0.264	0.000757077	0.0618182	H4C4	Infiltrating duct carcinoma, NOS
253	HIST1H3C	histone cluster 1, H3c	793	3	0	0	1	0	0	3	4	4	4	0.00061289	1	0.067	0.000963476	0.0715846	H3C3	Infiltrating duct carcinoma, NOS
64	HIST1H1C	histone cluster 1, H1c	646	10	0	1	4	0	0	1	5	5	5	0.0296767	0.01255	0.04875	0.000339061	0.0999277	H1-2	Hepatocellular carcinoma, NOS
77	H2AFY2	H2A histone family, member Y2	1151	20	0	0	4	0	0	0	4	4	4	0.000426759			0.000426759	0.103871	MACROH2A2	Hepatocellular carcinoma, NOS
54	H2AFY	H2A histone family, member Y	1246	33	0	1	2	1	1	0	4	3	4	0.000537277			0.000537277	0.187073	MACROH2A1	Adenocarcinoma with mixed subtypes
883	HIST1H2AA	histone cluster 1, H2aa	786	3	0	0	3	0	0	0	3	3	3	0.00895369			0.00895369	0.191262	H2AC1	Multiple myeloma
349	HIST1H2AK	histone cluster 1, H2ak	775	14	0	0	6	0	0	0	6	6	6	0.00375601			0.00375601	0.202493	H2AC15	Squamous cell carcinoma, NOS
389	HIST1H4C	histone cluster 1, H4c	314	15	0	0	9	0	0	1	10	10	9	0.00499372			0.00499372	0.240884	H4C3	Squamous cell carcinoma, NOS
216	H2AFV	H2A histone family, member V	425	4	0	0	3	0	0	0	3	3	3	0.00311036			0.00311036	0.271609	H2AZ2	Transitional cell carcinoma
1147	H1FOO	H1 histone family, member O, oocyte-specific	1061	12	0	0	1	0	0	1	2	2	2	0.0179461			0.0179461	0.294825	H1-8	Multiple myeloma
1155	HIST1H2AB	histone cluster 1, H2ab	395	2	1	2	3	0	0	0	3	3	3	0.0181057			0.0181057	0.295679	H2AC4	Multiple myeloma
1176	HIST1H1D	histone cluster 1, H1d	670	1	0	4	13	0	0	2	15	12	15	0.00271316	1	0.749	0.0187469	0.300684	H1-3	Multiple myeloma
440	HIST1H4E	histone cluster 1, H4e	314	4	0	4	11	0	0	1	12	12	9	0.381118	0.0023	0.6884	0.00704718	0.3021	H4C5	Squamous cell carcinoma, NOS
462	H2AFY	H2A histone family, member Y	1246	2	0	1	11	0	0	1	12	12	12	0.00816804			0.00816804	0.333211	MACROH2A1	Squamous cell carcinoma, NOS
298	HIST1H4G	histone cluster 1, H4g	299	86	0	0	3	0	0	0	3	3	3	0.00638301			0.00638301	0.404015	H4C7	Hepatocellular carcinoma, NOS
422	HIST1H2BA	histone cluster 1, H2ba	782	12	0	0	2	0	0	0	2	2	2	0.00923367			0.00923367	0.412682	H2BC1	Glioblastoma
1072	HIST1H2BN	histone cluster 1, H2bn	775	10	0	2	8	0	0	0	8	8	7	0.0247111			0.0247111	0.434546	H2BC15	Adenocarcinoma, NOS
565	HIST1H2AA	histone cluster 1, H2aa	782	12	0	0	7	1	0	1	9	9	8	0.0274729	0.057	0.316	0.0134326	0.448435	H2AC1	Squamous cell carcinoma, NOS
313	HIST1H1C	histone cluster 1, H1c	646	10	0	1	3	1	0	2	6	5	6	0.00106418	1	0.892	0.0083491	0.502931	H1-2	Serous cystadenocarcinoma, NOS
1710	HIST1H2BB	histone cluster 1, H2bb	796	8	2	1	2	0	0	0	2	2	2	0.633971	0.0119	0.8142	0.0465688	0.513314	H2BC3	Multiple myeloma
1207	H1FX	H1 histone family, member X	642	0	0	1	3	0	0	1	4	4	3	0.548806	0.01	0.9721	0.0340544	0.532174	H1-10	Adenocarcinoma, NOS
266	HIST1H3I	histone cluster 1, H3i	415	41	0	0	0	0	1	0	1	1	1	0.0077189			0.0077189	0.547345	H3C11	Clear cell adenocarcinoma, NOS
1800	HIST1H4E	histone cluster 1, H4e	314	0	5	2	5	0	0	0	5	5	4	0.0528457			0.0528457	0.553764	H4C5	Multiple myeloma
1221	HIST1H3D	histone cluster 1, H3d	1185	15	0	1	5	0	0	0	5	5	5	0.0379616			0.0379616	0.586263	H3C4	Infiltrating duct carcinoma, NOS
433	HIST1H3E	histone cluster 1, H3e	413	84	0	0	3	0	0	0	3	3	2	0.0408882	0.047	0.2	0.0139413	0.605867	H3C6	Transitional cell carcinoma
747	HIST1H3I	histone cluster 1, H3i	726	10	0	2	3	0	0	1	4	4	4	0.0241224			0.0241224	0.608606	H3C11	Squamous cell carcinoma, NOS
476	HIST1H2AL	histone cluster 1, H2al	397	10	1	0	3	1	0	0	4	4	2	0.0159629			0.0159629	0.632547	H2AC16	Transitional cell carcinoma
1978	HIST1H3G	histone cluster 1, H3g	796	0	0	0	5	0	0	0	5	5	5	0.0667716			0.0667716	0.636727	H3C8	Multiple myeloma
1080	HIST1H4D	histone cluster 1, H4d	314	15	0	1	3	1	0	1	5	5	5	0.0365698			0.0365698	0.638684	H4C4	Endometrioid adenocarcinoma, NOS
1989	HIST1H2BD	histone cluster 1, H2bd	994	2	0	1	2	0	0	1	3	3	3	0.0679017			0.0679017	0.643922	H2BC5	Multiple myeloma
392	HIST1H4B	histone cluster 1, H4b	314	70	0	0	2	0	0	0	2	2	2	0.0134334			0.0134334	0.645989	H4C2	Papillary adenocarcinoma, NOS
485	H1FOO	H1 histone family, member O, oocyte-specific	1061	14	0	1	5	0	0	0	5	5	5	0.0166751			0.0166751	0.6467	H1-8	Transitional cell carcinoma
495	H2AFY	H2A histone family, member Y	1246	19	0	0	5	0	0	0	5	5	5	0.0172105			0.0172105	0.655413	MACROH2A1	Mucinous adenocarcinoma
1368	HIST1H2AK	histone cluster 1, H2ak	775	11	0	0	7	0	0	0	7	7	7	0.0490574			0.0490574	0.676404	H2AC15	Adenocarcinoma, NOS
117	H2AFY	H2A histone family, member Y	1246	237	0	0	2	0	0	0	2	2	2	0.00439204			0.00439204	0.701584	MACROH2A1	Renal cell carcinoma, NOS
1176	HIST1H1D	histone cluster 1, H1d	670	12	0	2	7	0	0	2	9	9	7	0.157988	0.033	0.566	0.0453737	0.727754	H1-3	Endometrioid adenocarcinoma, NOS
1461	HIST1H2BC	histone cluster 1, H2bc	776	15	0	0	4	0	0	0	4	4	3	0.0577136			0.0577136	0.744113	H2BC4	Infiltrating duct carcinoma, NOS
2247	HIST1H2AL	histone cluster 1, H2al	397	2	2	1	2	0	0	0	2	2	2	0.0888457			0.0888457	0.745797	H2AC16	Multiple myeloma
2269	HIST1H2BN	histone cluster 1, H2bn	778	7	0	1	2	0	0	0	2	2	2	0.0905676			0.0905676	0.752881	H2BC15	Multiple myeloma
551	HIST1H4C	histone cluster 1, H4c	314	10	0	1	2	1	0	0	3	3	3	0.0220779			0.0220779	0.755779	H4C3	Hepatocellular carcinoma, NOS
21	HIST1H1C	histone cluster 1, H1c	646	30	0	0	8	0	0	2	10	6	10	8.18643e-05	1	0.913	0.000852245	0.765478	H1-2	Malignant lymphoma, large B-cell, diffuse, NOS
169	HIST1H2BI	histone cluster 1, H2bi	794	84	0	0	1	1	0	0	2	2	2	0.00712933			0.00712933	0.787725	H2BC10	Papillary transitional cell carcinoma
171	HIST1H1B	histone cluster 1, H1b	685	41	0	0	1	1	0	0	2	2	2	0.00715216			0.00715216	0.787725	H1-5	Papillary transitional cell carcinoma
1585	HIST1H2BE	histone cluster 1, H2be	383	15	0	0	1	0	0	1	2	2	2	0.0416507	1	0.24	0.066889	0.795424	H2BC6	Infiltrating duct carcinoma, NOS
22	HIST1H1B	histone cluster 1, H1b	685	41	0	0	1	2	0	0	3	3	3	0.000938423			0.000938423	0.80457	H1-5	Malignant lymphoma, large B-cell, diffuse, NOS
1294	HIST1H1B	histone cluster 1, H1b	685	11	0	1	5	0	0	0	5	5	5	0.0565758			0.0565758	0.824677	H1-5	Endometrioid adenocarcinoma, NOS
1623	HIST1H1T	histone cluster 1, H1t	628	15	0	0	3	0	0	0	3	3	3	0.0211035	1	0.544	0.0710995	0.824733	H1-6	Infiltrating duct carcinoma, NOS
491	HIST1H2AE	histone cluster 1, H2ae	775	12	0	1	3	0	0	0	3	3	3	0.0215533			0.0215533	0.825694	H2AC8	Papillary adenocarcinoma, NOS
153	HIST1H1D	histone cluster 1, H1d	670	117	0	0	2	0	0	0	2	2	2	0.0068446			0.0068446	0.839889	H1-3	Carcinoma, diffuse type
1689	HIST1H3B	histone cluster 1, H3b	805	4	0	1	5	0	0	1	6	6	6	0.0765487			0.0765487	0.854055	H3C2	Infiltrating duct carcinoma, NOS
195	H1FOO	H1 histone family, member O, oocyte-specific	1061	36	0	0	0	0	1	0	1	1	1	0.00919989			0.00919989	0.879728	H1-8	Renal cell carcinoma, NOS
1618	H2AFY2	H2A histone family, member Y2	1151	0	0	6	21	1	2	1	25	25	23	0.0779309			0.0779309	0.908487	MACROH2A2	Adenocarcinoma, NOS
1367	HIST1H3E	histone cluster 1, H3e	413	0	0	4	10	0	0	0	10	10	8	0.814773	0.0142	0.9795	0.0660522	0.910778	H3C6	Endometrioid adenocarcinoma, NOS
657	HIST1H2BN	histone cluster 1, H2bn	775	14	0	0	2	0	0	1	3	3	3	0.0320062			0.0320062	0.918875	H2BC15	Serous cystadenocarcinoma, NOS
156	HIST1H1D	histone cluster 1, H1d	670	88	0	0	2	0	0	0	2	2	2	0.00768279			0.00768279	0.926408	H1-3	Serous adenocarcinoma, NOS
1672	H2AFY	H2A histone family, member Y	1246	0	0	3	5	0	1	2	8	8	8	0.0828074			0.0828074	0.934158	MACROH2A1	Adenocarcinoma, NOS
1062	HIST1H1A	histone cluster 1, H1a	974	2	0	0	0	0	0	1	1	1	1	0.05319			0.05319	0.943322	H1-1	Glioblastoma
1097	H1FOO	H1 histone family, member O, oocyte-specific	1061	36	0	0	2	0	1	0	3	2	3	0.0562061			0.0562061	0.966384	H1-8	Glioblastoma
1110	HIST1H3F	histone cluster 1, H3f	796	79	0	0	2	0	0	0	2	2	2	0.0575609			0.0575609	0.976874	H3C7	Glioblastoma
1942	HIST1H1C	histone cluster 1, H1c	646	3	0	2	2	0	0	2	4	4	4	0.100958			0.100958	0.98025	H1-2	Infiltrating duct carcinoma, NOS
173	HIST1H4H	histone cluster 1, H4h	314	20	0	0	0	0	0	1	1	1	1	0.00907567			0.00907567	0.982607	H4C8	Serous adenocarcinoma, NOS
706	HIST1H3D	histone cluster 1, H3d	1185	160	0	0	2	1	0	0	3	3	3	0.0471731			0.0471731	1	H3C4	Adenocarcinoma, intestinal type
858	HIST1H1D	histone cluster 1, H1d	670	117	0	0	2	0	0	0	2	2	2	0.064122			0.064122	1	H1-3	Adenocarcinoma, intestinal type
900	HIST1H1E	histone cluster 1, H1e	664	112	0	0	2	0	0	0	2	2	2	0.0707067			0.0707067	1	H1-4	Adenocarcinoma, intestinal type
1280	HIST1H4G	histone cluster 1, H4g	299	19	0	0	1	0	0	0	1	1	1	0.126279			0.126279	1	H4C7	Adenocarcinoma, intestinal type
1395	H2AFY2	H2A histone family, member Y2	1151	2	0	1	2	0	0	0	2	2	2	0.143181			0.143181	1	MACROH2A2	Adenocarcinoma, intestinal type
1406	HIST1H4B	histone cluster 1, H4b	314	70	0	0	1	0	0	0	1	1	1	0.14528			0.14528	1	H4C2	Adenocarcinoma, intestinal type
1637	H2AFY	H2A histone family, member Y	1246	8	0	0	2	0	0	0	2	2	2	0.183779			0.183779	1	MACROH2A1	Adenocarcinoma, intestinal type
1684	H1FOO	H1 histone family, member O, oocyte-specific	1061	14	0	1	1	0	0	0	1	1	1	0.192897			0.192897	1	H1-8	Adenocarcinoma, intestinal type
1790	HIST1H2AL	histone cluster 1, H2al	397	41	0	0	1	0	0	0	1	1	1	0.208912			0.208912	1	H2AC16	Adenocarcinoma, intestinal type
2113	HIST1H1C	histone cluster 1, H1c	646	69	0	0	1	0	0	0	1	1	1	0.264083			0.264083	1	H1-2	Adenocarcinoma, intestinal type
2156	HIST1H3A	histone cluster 1, H3a	656	68	0	0	1	0	0	0	1	1	1	0.269601			0.269601	1	H3C1	Adenocarcinoma, intestinal type
2217	HIST1H1A	histone cluster 1, H1a	974	69	0	0	1	0	0	1	2	2	2	0.0792714	1	0.09	0.280215	1	H1-1	Adenocarcinoma, intestinal type
2227	HIST1H4A	histone cluster 1, H4a	725	69	0	0	1	0	0	0	1	1	1	0.281939			0.281939	1	H4C1	Adenocarcinoma, intestinal type
2631	HIST1H2AD	histone cluster 1, H2ad	776	160	0	0	0	0	0	1	1	1	1	0.348169			0.348169	1	H2AC7	Adenocarcinoma, intestinal type
3389	HIST1H2BD	histone cluster 1, H2bd	1011	160	0	0	1	0	0	0	1	1	1	0.49742			0.49742	1	H2BC5	Adenocarcinoma, intestinal type
3547	HIST1H3I	histone cluster 1, H3i	726	12	0	1	1	0	0	0	1	1	1	0.528195			0.528195	1	H3C11	Adenocarcinoma, intestinal type
4081	HIST1H3F	histone cluster 1, H3f	796	12	0	1	1	0	0	0	1	1	1	0.643975			0.643975	1	H3C7	Adenocarcinoma, intestinal type
4421	HIST1H2BH	histone cluster 1, H2bh	795	12	0	1	1	0	0	0	1	1	1	0.72076			0.72076	1	H2BC9	Adenocarcinoma, intestinal type
4785	HIST1H2AA	histone cluster 1, H2aa	782	1	0	1	1	0	0	0	1	1	1	0.820699			0.820699	1	H2AC1	Adenocarcinoma, intestinal type
5472	HIST2H3A	histone cluster 2, H3a	830	0	0	0	1	0	0	0	1	1	1	1			1	1	H3C15	Adenocarcinoma, intestinal type
5473	HIST2H4A	histone cluster 2, H4a	632	0	0	0	1	0	0	0	1	1	1	1			1	1	H4C14	Adenocarcinoma, intestinal type
7865	CENPA	centromere protein A	439	94	0	0	0	0	0	0	0	0	0	1			1	1	CENPA	Adenocarcinoma, intestinal type
8510	CXorf27	chromosome X open reading frame 27	356	9	0	0	0	0	0	0	0	0	0	1			1	1	H2AP	Adenocarcinoma, intestinal type
10601	H1F0	H1 histone family, member 0	585	12	0	0	0	0	0	0	0	0	0	1			1	1	H1-0	Adenocarcinoma, intestinal type
10602	H1FNT	H1 histone family, member N, testis-specific	768	60	0	0	0	0	0	0	0	0	0	1			1	1	H1-7	Adenocarcinoma, intestinal type
10603	H1FX	H1 histone family, member X	642	36	0	0	0	0	0	0	0	0	0	1			1	1	H1-10	Adenocarcinoma, intestinal type
10604	H2AFB1	H2A histone family, member B1	10543	3	0	0	0	0	0	0	0	0	0	1			1	1	H2AB1	Adenocarcinoma, intestinal type
10605	H2AFB2	H2A histone family, member B2	700	0	0	0	0	0	0	0	0	0	0	1			1	1	H2AB2	Adenocarcinoma, intestinal type
10606	H2AFB3	H2A histone family, member B3	10543	3	0	0	0	0	0	0	0	0	0	1			1	1	H2AB3	Adenocarcinoma, intestinal type
10607	H2AFJ	H2A histone family, member J	390	20	0	0	0	0	0	0	0	0	0	1			1	1	H2AJ	Adenocarcinoma, intestinal type
10608	H2AFV	H2A histone family, member V	425	4	0	0	0	0	0	0	0	0	0	1			1	1	H2AZ2	Adenocarcinoma, intestinal type
10609	H2AFX	H2A histone family, member X	983	75	0	0	0	0	0	0	0	0	0	1			1	1	H2AX	Adenocarcinoma, intestinal type
10610	H2AFZ	H2A histone family, member Z	403	2	0	0	0	0	0	0	0	0	0	1			1	1	H2AZ1	Adenocarcinoma, intestinal type
10611	H2BFM	H2B histone family, member M	475	0	0	0	0	0	0	0	0	0	0	1			1	1	H2BW2	Adenocarcinoma, intestinal type
10612	H2BFWT	H2B histone family, member W, testis-specific	538	0	0	0	0	0	0	0	0	0	0	1			1	1	H2BW1	Adenocarcinoma, intestinal type
10613	H3F3A	H3 histone, family 3A	423	5	0	0	0	0	0	0	0	0	0	1			1	1	H3-3A	Adenocarcinoma, intestinal type
10614	H3F3B	H3 histone, family 3B (H3.3B)	423	3	0	0	0	0	0	0	0	0	0	1			1	1	H3-3B	Adenocarcinoma, intestinal type
10615	H3F3C	H3 histone, family 3C	410	32	0	0	0	0	0	0	0	0	0	1			1	1	H3-5	Adenocarcinoma, intestinal type
10754	HIST1H1B	histone cluster 1, H1b	685	41	0	0	0	0	0	0	0	0	0	1			1	1	H1-5	Adenocarcinoma, intestinal type
10755	HIST1H1T	histone cluster 1, H1t	628	112	0	0	0	0	0	0	0	0	0	1			1	1	H1-6	Adenocarcinoma, intestinal type
10756	HIST1H2AB	histone cluster 1, H2ab	395	69	0	0	0	0	0	0	0	0	0	1			1	1	H2AC4	Adenocarcinoma, intestinal type
10757	HIST1H2AC	histone cluster 1, H2ac	777	160	0	0	0	0	0	0	0	0	0	1			1	1	H2AC6	Adenocarcinoma, intestinal type
10758	HIST1H2AE	histone cluster 1, H2ae	775	108	0	0	0	0	0	0	0	0	0	1			1	1	H2AC8	Adenocarcinoma, intestinal type
10759	HIST1H2AG	histone cluster 1, H2ag	778	104	0	0	0	0	0	0	0	0	0	1			1	1	H2AC11	Adenocarcinoma, intestinal type
10760	HIST1H2AH	histone cluster 1, H2ah	772	104	0	0	0	0	0	0	0	0	0	1			1	1	H2AC12	Adenocarcinoma, intestinal type
10761	HIST1H2AI	histone cluster 1, H2ai	777	7	0	0	0	0	0	0	0	0	0	1			1	1	H2AC13	Adenocarcinoma, intestinal type
10762	HIST1H2AJ	histone cluster 1, H2aj	768	7	0	0	0	0	0	0	0	0	0	1			1	1	H2AC14	Adenocarcinoma, intestinal type
10763	HIST1H2AK	histone cluster 1, H2ak	776	41	0	0	0	0	0	0	0	0	0	1			1	1	H2AC15	Adenocarcinoma, intestinal type
10764	HIST1H2AM	histone cluster 1, H2am	778	41	0	0	0	0	0	0	0	0	0	1			1	1	H2AC17	Adenocarcinoma, intestinal type
10765	HIST1H2BA	histone cluster 1, H2ba	782	19	0	0	0	0	0	0	0	0	0	1			1	1	H2BC1	Adenocarcinoma, intestinal type
10766	HIST1H2BB	histone cluster 1, H2bb	793	68	0	0	0	0	0	0	0	0	0	1			1	1	H2BC3	Adenocarcinoma, intestinal type
10767	HIST1H2BC	histone cluster 1, H2bc	776	160	0	0	0	0	0	0	0	0	0	1			1	1	H2BC4	Adenocarcinoma, intestinal type
10768	HIST1H2BE	histone cluster 1, H2be	383	160	0	0	0	0	0	0	0	0	0	1			1	1	H2BC6	Adenocarcinoma, intestinal type
10769	HIST1H2BF	histone cluster 1, H2bf	1185	65	0	0	0	0	0	0	0	0	0	1			1	1	H2BC7	Adenocarcinoma, intestinal type
10770	HIST1H2BG	histone cluster 1, H2bg	777	19	0	0	0	0	0	0	0	0	0	1			1	1	H2BC8	Adenocarcinoma, intestinal type
10771	HIST1H2BI	histone cluster 1, H2bi	794	19	0	0	0	0	0	0	0	0	0	1			1	1	H2BC10	Adenocarcinoma, intestinal type
10772	HIST1H2BJ	histone cluster 1, H2bj	778	104	0	0	0	0	0	0	0	0	0	1			1	1	H2BC11	Adenocarcinoma, intestinal type
10773	HIST1H2BK	histone cluster 1, H2bk	1085	103	0	0	0	0	0	0	0	0	0	1			1	1	H2BC12	Adenocarcinoma, intestinal type
10774	HIST1H2BL	histone cluster 1, H2bl	1190	7	0	0	0	0	0	0	0	0	0	1			1	1	H2BC13	Adenocarcinoma, intestinal type
10775	HIST1H2BM	histone cluster 1, H2bm	769	7	0	0	0	0	0	0	0	0	0	1			1	1	H2BC14	Adenocarcinoma, intestinal type
10776	HIST1H2BN	histone cluster 1, H2bn	775	41	0	0	0	0	0	0	0	0	0	1			1	1	H2BC15	Adenocarcinoma, intestinal type
10777	HIST1H2BO	histone cluster 1, H2bo	1144	41	0	0	0	0	0	0	0	0	0	1			1	1	H2BC17	Adenocarcinoma, intestinal type
10778	HIST1H3B	histone cluster 1, H3b	805	69	0	0	0	0	0	0	0	0	0	1			1	1	H3C2	Adenocarcinoma, intestinal type
10779	HIST1H3C	histone cluster 1, H3c	793	69	0	0	0	0	0	0	0	0	0	1			1	1	H3C3	Adenocarcinoma, intestinal type
10780	HIST1H3E	histone cluster 1, H3e	413	12	0	1	0	0	0	0	0	0	0	1			1	1	H3C6	Adenocarcinoma, intestinal type
10781	HIST1H3G	histone cluster 1, H3g	794	109	0	0	0	0	0	0	0	0	0	1			1	1	H3C8	Adenocarcinoma, intestinal type
10782	HIST1H3H	histone cluster 1, H3h	1188	7	0	0	0	0	0	0	0	0	0	1			1	1	H3C10	Adenocarcinoma, intestinal type
10783	HIST1H3J	histone cluster 1, H3j	1136	41	0	0	0	0	0	0	0	0	0	1			1	1	H3C12	Adenocarcinoma, intestinal type
10784	HIST1H4C	histone cluster 1, H4c	314	120	0	0	0	0	0	0	0	0	0	1			1	1	H4C3	Adenocarcinoma, intestinal type
10785	HIST1H4D	histone cluster 1, H4d	314	120	0	0	0	0	0	0	0	0	0	1			1	1	H4C4	Adenocarcinoma, intestinal type
10786	HIST1H4E	histone cluster 1, H4e	314	19	0	0	0	0	0	0	0	0	0	1			1	1	H4C5	Adenocarcinoma, intestinal type
10787	HIST1H4F	histone cluster 1, H4f	314	19	0	0	0	0	0	0	0	0	0	1			1	1	H4C6	Adenocarcinoma, intestinal type
10788	HIST1H4H	histone cluster 1, H4h	314	20	0	0	0	0	0	0	0	0	0	1			1	1	H4C8	Adenocarcinoma, intestinal type
10789	HIST1H4I	histone cluster 1, H4i	314	103	0	0	0	0	0	0	0	0	0	1			1	1	H4C9	Adenocarcinoma, intestinal type
10790	HIST1H4J	histone cluster 1, H4j	314	7	0	0	0	0	0	0	0	0	0	1			1	1	H4C11	Adenocarcinoma, intestinal type
10791	HIST1H4K	histone cluster 1, H4k	314	7	0	0	0	0	0	0	0	0	0	1			1	1	H4C12	Adenocarcinoma, intestinal type
10792	HIST1H4L	histone cluster 1, H4l	315	41	0	0	0	0	0	0	0	0	0	1			1	1	H4C13	Adenocarcinoma, intestinal type
10793	HIST2H2AA3	histone cluster 2, H2aa3	794	0	0	0	0	0	0	0	0	0	0	1			1	1	H2AC18	Adenocarcinoma, intestinal type
10794	HIST2H2AA4	histone cluster 2, H2aa4	794	0	0	0	0	0	0	0	0	0	0	1			1	1	H2AC19	Adenocarcinoma, intestinal type
10795	HIST2H2AB	histone cluster 2, H2ab	395	1	0	0	0	0	0	0	0	0	0	1			1	1	H2AC21	Adenocarcinoma, intestinal type
10796	HIST2H2AC	histone cluster 2, H2ac	773	2	0	0	0	0	0	0	0	0	0	1			1	1	H2AC20	Adenocarcinoma, intestinal type
10797	HIST2H2BE	histone cluster 2, H2be	1165	0	0	0	0	0	0	0	0	0	0	1			1	1	H2BC21	Adenocarcinoma, intestinal type
10798	HIST2H2BF	histone cluster 2, H2bf	1793	13	0	0	0	0	0	0	0	0	0	1			1	1	H2BC18	Adenocarcinoma, intestinal type
10799	HIST2H3C	histone cluster 2, H3c	830	0	0	0	0	0	0	0	0	0	0	1			1	1	H3C14	Adenocarcinoma, intestinal type
10800	HIST2H3D	histone cluster 2, H3d	409	4	0	0	0	0	0	0	0	0	0	1			1	1	H3C13	Adenocarcinoma, intestinal type
10801	HIST2H4B	histone cluster 2, H4b	632	0	0	0	0	0	0	0	0	0	0	1			1	1	H4C15	Adenocarcinoma, intestinal type
10802	HIST3H2A	histone cluster 3, H2a	778	9	0	0	0	0	0	0	0	0	0	1			1	1	H2AC25	Adenocarcinoma, intestinal type
10803	HIST3H2BB	histone cluster 3, H2bb	778	9	0	0	0	0	0	0	0	0	0	1			1	1	H2BC26	Adenocarcinoma, intestinal type
10804	HIST3H3	histone cluster 3, H3	413	9	0	0	0	0	0	0	0	0	0	1			1	1	H3-4	Adenocarcinoma, intestinal type
10805	HIST4H4	histone cluster 4, H4	316	20	0	0	0	0	0	0	0	0	0	1			1	1	H4C16	Adenocarcinoma, intestinal type
5104	CENPA	centromere protein A	439	3	0	0	0	0	0	0	0	0	0	1			1	1	CENPA	Nodular melanoma
5894	CXorf27	chromosome X open reading frame 27	356	9	0	0	0	0	0	0	0	0	0	1			1	1	H2AP	Nodular melanoma
8493	H1F0	H1 histone family, member 0	585	9	0	0	0	0	0	0	0	0	0	1			1	1	H1-0	Nodular melanoma
8494	H1FNT	H1 histone family, member N, testis-specific	768	60	0	0	0	0	0	0	0	0	0	1			1	1	H1-7	Nodular melanoma
8495	H1FOO	H1 histone family, member O, oocyte-specific	1061	36	0	0	0	0	0	0	0	0	0	1			1	1	H1-8	Nodular melanoma
8496	H1FX	H1 histone family, member X	642	36	0	0	0	0	0	0	0	0	0	1			1	1	H1-10	Nodular melanoma
8497	H2AFB1	H2A histone family, member B1	10542	22	0	0	0	0	0	0	0	0	0	1			1	1	H2AB1	Nodular melanoma
8498	H2AFB2	H2A histone family, member B2	700	0	0	0	0	0	0	0	0	0	0	1			1	1	H2AB2	Nodular melanoma
8499	H2AFB3	H2A histone family, member B3	10542	22	0	0	0	0	0	0	0	0	0	1			1	1	H2AB3	Nodular melanoma
8500	H2AFJ	H2A histone family, member J	390	20	0	0	0	0	0	0	0	0	0	1			1	1	H2AJ	Nodular melanoma
8501	H2AFV	H2A histone family, member V	425	4	0	0	0	0	0	0	0	0	0	1			1	1	H2AZ2	Nodular melanoma
8502	H2AFX	H2A histone family, member X	982	75	0	0	0	0	0	0	0	0	0	1			1	1	H2AX	Nodular melanoma
8503	H2AFY	H2A histone family, member Y	1246	225	0	0	0	0	0	0	0	0	0	1			1	1	MACROH2A1	Nodular melanoma
8504	H2AFY2	H2A histone family, member Y2	1151	49	0	0	0	0	0	0	0	0	0	1			1	1	MACROH2A2	Nodular melanoma
8505	H2AFZ	H2A histone family, member Z	403	2	0	0	0	0	0	0	0	0	0	1			1	1	H2AZ1	Nodular melanoma
8506	H2BFM	H2B histone family, member M	475	0	0	0	0	0	0	0	0	0	0	1			1	1	H2BW2	Nodular melanoma
8507	H2BFWT	H2B histone family, member W, testis-specific	538	0	0	0	0	0	0	0	0	0	0	1			1	1	H2BW1	Nodular melanoma
8508	H3F3A	H3 histone, family 3A	423	5	0	0	0	0	0	0	0	0	0	1			1	1	H3-3A	Nodular melanoma
8509	H3F3B	H3 histone, family 3B (H3.3B)	423	3	0	0	0	0	0	0	0	0	0	1			1	1	H3-3B	Nodular melanoma
8510	H3F3C	H3 histone, family 3C	410	32	0	0	0	0	0	0	0	0	0	1			1	1	H3-5	Nodular melanoma
8676	HIST1H1A	histone cluster 1, H1a	974	69	0	0	0	0	0	0	0	0	0	1			1	1	H1-1	Nodular melanoma
8677	HIST1H1B	histone cluster 1, H1b	685	41	0	0	0	0	0	0	0	0	0	1			1	1	H1-5	Nodular melanoma
8678	HIST1H1C	histone cluster 1, H1c	646	69	0	0	0	0	0	0	0	0	0	1			1	1	H1-2	Nodular melanoma
8679	HIST1H1D	histone cluster 1, H1d	670	117	0	0	0	0	0	0	0	0	0	1			1	1	H1-3	Nodular melanoma
8680	HIST1H1E	histone cluster 1, H1e	664	112	0	0	0	0	0	0	0	0	0	1			1	1	H1-4	Nodular melanoma
8681	HIST1H1T	histone cluster 1, H1t	628	112	0	0	0	0	0	0	0	0	0	1			1	1	H1-6	Nodular melanoma
8682	HIST1H2AA	histone cluster 1, H2aa	782	19	0	0	0	0	0	0	0	0	0	1			1	1	H2AC1	Nodular melanoma
8683	HIST1H2AB	histone cluster 1, H2ab	395	69	0	0	0	0	0	0	0	0	0	1			1	1	H2AC4	Nodular melanoma
8684	HIST1H2AC	histone cluster 1, H2ac	777	160	0	0	0	0	0	0	0	0	0	1			1	1	H2AC6	Nodular melanoma
8685	HIST1H2AD	histone cluster 1, H2ad	776	160	0	0	0	0	0	0	0	0	0	1			1	1	H2AC7	Nodular melanoma
8686	HIST1H2AE	histone cluster 1, H2ae	775	108	0	0	0	0	0	0	0	0	0	1			1	1	H2AC8	Nodular melanoma
8687	HIST1H2AG	histone cluster 1, H2ag	778	104	0	0	0	0	0	0	0	0	0	1			1	1	H2AC11	Nodular melanoma
8688	HIST1H2AH	histone cluster 1, H2ah	772	104	0	0	0	0	0	0	0	0	0	1			1	1	H2AC12	Nodular melanoma
8689	HIST1H2AI	histone cluster 1, H2ai	777	7	0	0	0	0	0	0	0	0	0	1			1	1	H2AC13	Nodular melanoma
8690	HIST1H2AJ	histone cluster 1, H2aj	768	7	0	0	0	0	0	0	0	0	0	1			1	1	H2AC14	Nodular melanoma
8691	HIST1H2AK	histone cluster 1, H2ak	775	41	0	0	0	0	0	0	0	0	0	1			1	1	H2AC15	Nodular melanoma
8692	HIST1H2AL	histone cluster 1, H2al	397	10	0	1	0	0	0	0	0	0	0	1			1	1	H2AC16	Nodular melanoma
8693	HIST1H2AM	histone cluster 1, H2am	778	41	0	0	0	0	0	0	0	0	0	1			1	1	H2AC17	Nodular melanoma
8694	HIST1H2BA	histone cluster 1, H2ba	782	19	0	0	0	0	0	0	0	0	0	1			1	1	H2BC1	Nodular melanoma
8695	HIST1H2BB	histone cluster 1, H2bb	793	68	0	0	0	0	0	0	0	0	0	1			1	1	H2BC3	Nodular melanoma
8696	HIST1H2BC	histone cluster 1, H2bc	776	160	0	0	0	0	0	0	0	0	0	1			1	1	H2BC4	Nodular melanoma
8697	HIST1H2BD	histone cluster 1, H2bd	1011	160	0	0	0	0	0	0	0	0	0	1			1	1	H2BC5	Nodular melanoma
8698	HIST1H2BE	histone cluster 1, H2be	383	188	0	0	0	0	0	0	0	0	0	1			1	1	H2BC6	Nodular melanoma
8699	HIST1H2BF	histone cluster 1, H2bf	1185	65	0	0	0	0	0	0	0	0	0	1			1	1	H2BC7	Nodular melanoma
8700	HIST1H2BG	histone cluster 1, H2bg	777	84	0	0	0	0	0	0	0	0	0	1			1	1	H2BC8	Nodular melanoma
8701	HIST1H2BH	histone cluster 1, H2bh	795	84	0	0	0	0	0	0	0	0	0	1			1	1	H2BC9	Nodular melanoma
8702	HIST1H2BI	histone cluster 1, H2bi	794	84	0	0	0	0	0	0	0	0	0	1			1	1	H2BC10	Nodular melanoma
8703	HIST1H2BJ	histone cluster 1, H2bj	778	104	0	0	0	0	0	0	0	0	0	1			1	1	H2BC11	Nodular melanoma
8704	HIST1H2BK	histone cluster 1, H2bk	1085	103	0	0	0	0	0	0	0	0	0	1			1	1	H2BC12	Nodular melanoma
8705	HIST1H2BL	histone cluster 1, H2bl	1190	7	0	0	0	0	0	0	0	0	0	1			1	1	H2BC13	Nodular melanoma
8706	HIST1H2BM	histone cluster 1, H2bm	769	7	0	0	0	0	0	0	0	0	0	1			1	1	H2BC14	Nodular melanoma
8707	HIST1H2BN	histone cluster 1, H2bn	775	41	0	0	0	0	0	0	0	0	0	1			1	1	H2BC15	Nodular melanoma
8708	HIST1H2BO	histone cluster 1, H2bo	1144	41	0	0	0	0	0	0	0	0	0	1			1	1	H2BC17	Nodular melanoma
8709	HIST1H3A	histone cluster 1, H3a	656	68	0	0	0	0	0	0	0	0	0	1			1	1	H3C1	Nodular melanoma
8710	HIST1H3B	histone cluster 1, H3b	804	69	0	0	0	0	0	0	0	0	0	1			1	1	H3C2	Nodular melanoma
8711	HIST1H3C	histone cluster 1, H3c	793	9	0	1	0	0	0	0	0	0	0	1			1	1	H3C3	Nodular melanoma
8712	HIST1H3D	histone cluster 1, H3d	1185	114	0	0	0	0	0	0	0	0	0	1			1	1	H3C4	Nodular melanoma
8713	HIST1H3E	histone cluster 1, H3e	413	84	0	0	0	0	0	0	0	0	0	1			1	1	H3C6	Nodular melanoma
8714	HIST1H3F	histone cluster 1, H3f	796	109	0	0	0	0	0	0	0	0	0	1			1	1	H3C7	Nodular melanoma
8715	HIST1H3G	histone cluster 1, H3g	793	109	0	0	0	0	0	0	0	0	0	1			1	1	H3C8	Nodular melanoma
8716	HIST1H3H	histone cluster 1, H3h	1188	7	0	0	0	0	0	0	0	0	0	1			1	1	H3C10	Nodular melanoma
8717	HIST1H3I	histone cluster 1, H3i	726	41	0	0	0	0	0	0	0	0	0	1			1	1	H3C11	Nodular melanoma
8718	HIST1H3J	histone cluster 1, H3j	1136	41	0	0	0	0	0	0	0	0	0	1			1	1	H3C12	Nodular melanoma
8719	HIST1H4A	histone cluster 1, H4a	725	69	0	0	0	0	0	0	0	0	0	1			1	1	H4C1	Nodular melanoma
8720	HIST1H4B	histone cluster 1, H4b	314	70	0	0	0	0	0	0	0	0	0	1			1	1	H4C2	Nodular melanoma
8721	HIST1H4C	histone cluster 1, H4c	314	120	0	0	0	0	0	0	0	0	0	1			1	1	H4C3	Nodular melanoma
8722	HIST1H4D	histone cluster 1, H4d	314	120	0	0	0	0	0	0	0	0	0	1			1	1	H4C4	Nodular melanoma
8723	HIST1H4E	histone cluster 1, H4e	314	85	0	0	0	0	0	0	0	0	0	1			1	1	H4C5	Nodular melanoma
8724	HIST1H4F	histone cluster 1, H4f	314	85	0	0	0	0	0	0	0	0	0	1			1	1	H4C6	Nodular melanoma
8725	HIST1H4G	histone cluster 1, H4g	299	86	0	0	0	0	0	0	0	0	0	1			1	1	H4C7	Nodular melanoma
8726	HIST1H4H	histone cluster 1, H4h	314	86	0	0	0	0	0	0	0	0	0	1			1	1	H4C8	Nodular melanoma
8727	HIST1H4I	histone cluster 1, H4i	314	195	0	0	0	0	0	0	0	0	0	1			1	1	H4C9	Nodular melanoma
8728	HIST1H4J	histone cluster 1, H4j	314	7	0	0	0	0	0	0	0	0	0	1			1	1	H4C11	Nodular melanoma
8729	HIST1H4K	histone cluster 1, H4k	314	7	0	0	0	0	0	0	0	0	0	1			1	1	H4C12	Nodular melanoma
8730	HIST1H4L	histone cluster 1, H4l	315	45	0	0	0	0	0	0	0	0	0	1			1	1	H4C13	Nodular melanoma
8731	HIST2H2AA3	histone cluster 2, H2aa3	794	0	0	0	0	0	0	0	0	0	0	1			1	1	H2AC18	Nodular melanoma
8732	HIST2H2AA4	histone cluster 2, H2aa4	794	0	0	0	0	0	0	0	0	0	0	1			1	1	H2AC19	Nodular melanoma
8733	HIST2H2AB	histone cluster 2, H2ab	395	1	0	0	0	0	0	0	0	0	0	1			1	1	H2AC21	Nodular melanoma
8734	HIST2H2AC	histone cluster 2, H2ac	773	2	0	0	0	0	0	0	0	0	0	1			1	1	H2AC20	Nodular melanoma
8735	HIST2H2BE	histone cluster 2, H2be	1165	0	0	0	0	0	0	0	0	0	0	1			1	1	H2BC21	Nodular melanoma
8736	HIST2H2BF	histone cluster 2, H2bf	1792	13	0	0	0	0	0	0	0	0	0	1			1	1	H2BC18	Nodular melanoma
8737	HIST2H3A	histone cluster 2, H3a	830	0	0	0	0	0	0	0	0	0	0	1			1	1	H3C15	Nodular melanoma
8738	HIST2H3C	histone cluster 2, H3c	830	0	0	0	0	0	0	0	0	0	0	1			1	1	H3C14	Nodular melanoma
8739	HIST2H3D	histone cluster 2, H3d	409	4	0	0	0	0	0	0	0	0	0	1			1	1	H3C13	Nodular melanoma
8740	HIST2H4A	histone cluster 2, H4a	632	0	0	0	0	0	0	0	0	0	0	1			1	1	H4C14	Nodular melanoma
8741	HIST2H4B	histone cluster 2, H4b	632	0	0	0	0	0	0	0	0	0	0	1			1	1	H4C15	Nodular melanoma
8742	HIST3H2A	histone cluster 3, H2a	778	9	0	0	0	0	0	0	0	0	0	1			1	1	H2AC25	Nodular melanoma
8743	HIST3H2BB	histone cluster 3, H2bb	778	9	0	0	0	0	0	0	0	0	0	1			1	1	H2BC26	Nodular melanoma
8744	HIST3H3	histone cluster 3, H3	413	9	0	0	0	0	0	0	0	0	0	1			1	1	H3-4	Nodular melanoma
8745	HIST4H4	histone cluster 4, H4	316	20	0	0	0	0	0	0	0	0	0	1			1	1	H4C16	Nodular melanoma
497	HIST1H4F	histone cluster 1, H4f	314	19	0	0	1	0	0	0	1	1	1	0.0427107			0.0427107	1	H4C6	Carcinoma, diffuse type
554	HIST1H2BG	histone cluster 1, H2bg	777	19	0	0	0	0	0	1	1	1	1	0.0503854			0.0503854	1	H2BC8	Carcinoma, diffuse type
773	H1FOO	H1 histone family, member O, oocyte-specific	1061	36	0	0	1	0	0	0	1	1	1	0.0812846			0.0812846	1	H1-8	Carcinoma, diffuse type
872	HIST1H4D	histone cluster 1, H4d	314	120	0	0	0	0	0	1	1	1	1	0.0948152			0.0948152	1	H4C4	Carcinoma, diffuse type
1136	HIST1H2BI	histone cluster 1, H2bi	794	19	0	0	1	0	0	0	1	1	1	0.137148			0.137148	1	H2BC10	Carcinoma, diffuse type
1374	HIST1H3F	histone cluster 1, H3f	796	84	0	0	1	0	0	0	1	1	1	0.178847			0.178847	1	H3C7	Carcinoma, diffuse type
1522	HIST1H2AE	histone cluster 1, H2ae	775	108	0	0	2	0	0	0	2	1	2	0.202698			0.202698	1	H2AC8	Carcinoma, diffuse type
1530	HIST1H1E	histone cluster 1, H1e	664	112	0	0	1	0	0	0	1	1	1	0.203466			0.203466	1	H1-4	Carcinoma, diffuse type
1574	HIST1H1C	histone cluster 1, H1c	646	69	0	0	2	0	0	1	3	1	3	0.211803			0.211803	1	H1-2	Carcinoma, diffuse type
1628	HIST1H2AD	histone cluster 1, H2ad	776	160	0	0	1	0	0	0	1	1	1	0.221622			0.221622	1	H2AC7	Carcinoma, diffuse type
2011	HIST1H1A	histone cluster 1, H1a	974	69	0	0	1	0	0	0	1	1	1	0.293731			0.293731	1	H1-1	Carcinoma, diffuse type
2323	HIST1H2BD	histone cluster 1, H2bd	1011	160	0	0	1	0	0	0	1	1	1	0.354595			0.354595	1	H2BC5	Carcinoma, diffuse type
2353	HIST1H2AK	histone cluster 1, H2ak	775	41	0	0	1	0	0	0	1	1	1	0.361976			0.361976	1	H2AC15	Carcinoma, diffuse type
3060	HIST1H2BC	histone cluster 1, H2bc	776	12	0	1	1	0	0	0	1	1	1	0.564667			0.564667	1	H2BC4	Carcinoma, diffuse type
3857	HIST2H3A	histone cluster 2, H3a	830	0	0	0	1	0	0	0	1	1	1	1			1	1	H3C15	Carcinoma, diffuse type
6508	CENPA	centromere protein A	439	94	0	0	0	0	0	0	0	0	0	1			1	1	CENPA	Carcinoma, diffuse type
7239	CXorf27	chromosome X open reading frame 27	356	9	0	0	0	0	0	0	0	0	0	1			1	1	H2AP	Carcinoma, diffuse type
9595	H1F0	H1 histone family, member 0	585	9	0	0	0	0	0	0	0	0	0	1			1	1	H1-0	Carcinoma, diffuse type
9596	H1FNT	H1 histone family, member N, testis-specific	768	60	0	0	0	0	0	0	0	0	0	1			1	1	H1-7	Carcinoma, diffuse type
9597	H1FX	H1 histone family, member X	642	36	0	0	0	0	0	0	0	0	0	1			1	1	H1-10	Carcinoma, diffuse type
9598	H2AFB1	H2A histone family, member B1	10542	3	0	0	0	0	0	0	0	0	0	1			1	1	H2AB1	Carcinoma, diffuse type
9599	H2AFB2	H2A histone family, member B2	700	0	0	0	0	0	0	0	0	0	0	1			1	1	H2AB2	Carcinoma, diffuse type
9600	H2AFB3	H2A histone family, member B3	10542	3	0	0	0	0	0	0	0	0	0	1			1	1	H2AB3	Carcinoma, diffuse type
9601	H2AFJ	H2A histone family, member J	390	20	0	0	0	0	0	0	0	0	0	1			1	1	H2AJ	Carcinoma, diffuse type
9602	H2AFV	H2A histone family, member V	425	4	0	0	0	0	0	0	0	0	0	1			1	1	H2AZ2	Carcinoma, diffuse type
9603	H2AFX	H2A histone family, member X	982	75	0	0	0	0	0	0	0	0	0	1			1	1	H2AX	Carcinoma, diffuse type
9604	H2AFY	H2A histone family, member Y	1246	33	0	1	0	0	0	0	0	0	0	1			1	1	MACROH2A1	Carcinoma, diffuse type
9605	H2AFY2	H2A histone family, member Y2	1151	2	0	1	0	0	0	0	0	0	0	1			1	1	MACROH2A2	Carcinoma, diffuse type
9606	H2AFZ	H2A histone family, member Z	403	2	0	0	0	0	0	0	0	0	0	1			1	1	H2AZ1	Carcinoma, diffuse type
9607	H2BFM	H2B histone family, member M	475	0	0	0	0	0	0	0	0	0	0	1			1	1	H2BW2	Carcinoma, diffuse type
9608	H2BFWT	H2B histone family, member W, testis-specific	538	0	0	0	0	0	0	0	0	0	0	1			1	1	H2BW1	Carcinoma, diffuse type
9609	H3F3A	H3 histone, family 3A	423	5	0	0	0	0	0	0	0	0	0	1			1	1	H3-3A	Carcinoma, diffuse type
9610	H3F3B	H3 histone, family 3B (H3.3B)	423	3	0	0	0	0	0	0	0	0	0	1			1	1	H3-3B	Carcinoma, diffuse type
9611	H3F3C	H3 histone, family 3C	410	32	0	0	0	0	0	0	0	0	0	1			1	1	H3-5	Carcinoma, diffuse type
9761	HIST1H1B	histone cluster 1, H1b	685	41	0	0	0	0	0	0	0	0	0	1			1	1	H1-5	Carcinoma, diffuse type
9762	HIST1H1T	histone cluster 1, H1t	628	112	0	0	0	0	0	0	0	0	0	1			1	1	H1-6	Carcinoma, diffuse type
9763	HIST1H2AA	histone cluster 1, H2aa	782	19	0	0	0	0	0	0	0	0	0	1			1	1	H2AC1	Carcinoma, diffuse type
9764	HIST1H2AB	histone cluster 1, H2ab	395	69	0	0	0	0	0	0	0	0	0	1			1	1	H2AC4	Carcinoma, diffuse type
9765	HIST1H2AC	histone cluster 1, H2ac	777	160	0	0	0	0	0	0	0	0	0	1			1	1	H2AC6	Carcinoma, diffuse type
9766	HIST1H2AG	histone cluster 1, H2ag	778	104	0	0	0	0	0	0	0	0	0	1			1	1	H2AC11	Carcinoma, diffuse type
9767	HIST1H2AH	histone cluster 1, H2ah	772	104	0	0	0	0	0	0	0	0	0	1			1	1	H2AC12	Carcinoma, diffuse type
9768	HIST1H2AI	histone cluster 1, H2ai	777	7	0	0	0	0	0	0	0	0	0	1			1	1	H2AC13	Carcinoma, diffuse type
9769	HIST1H2AJ	histone cluster 1, H2aj	768	7	0	0	0	0	0	0	0	0	0	1			1	1	H2AC14	Carcinoma, diffuse type
9770	HIST1H2AL	histone cluster 1, H2al	397	41	0	0	0	0	0	0	0	0	0	1			1	1	H2AC16	Carcinoma, diffuse type
9771	HIST1H2AM	histone cluster 1, H2am	778	41	0	0	0	0	0	0	0	0	0	1			1	1	H2AC17	Carcinoma, diffuse type
9772	HIST1H2BA	histone cluster 1, H2ba	782	19	0	0	0	0	0	0	0	0	0	1			1	1	H2BC1	Carcinoma, diffuse type
9773	HIST1H2BB	histone cluster 1, H2bb	793	68	0	0	0	0	0	0	0	0	0	1			1	1	H2BC3	Carcinoma, diffuse type
9774	HIST1H2BE	histone cluster 1, H2be	383	160	0	0	0	0	0	0	0	0	0	1			1	1	H2BC6	Carcinoma, diffuse type
9775	HIST1H2BF	histone cluster 1, H2bf	1185	65	0	0	0	0	0	0	0	0	0	1			1	1	H2BC7	Carcinoma, diffuse type
9776	HIST1H2BH	histone cluster 1, H2bh	795	19	0	0	0	0	0	0	0	0	0	1			1	1	H2BC9	Carcinoma, diffuse type
9777	HIST1H2BJ	histone cluster 1, H2bj	778	104	0	0	0	0	0	0	0	0	0	1			1	1	H2BC11	Carcinoma, diffuse type
9778	HIST1H2BK	histone cluster 1, H2bk	1085	103	0	0	0	0	0	0	0	0	0	1			1	1	H2BC12	Carcinoma, diffuse type
9779	HIST1H2BL	histone cluster 1, H2bl	1190	7	0	0	0	0	0	0	0	0	0	1			1	1	H2BC13	Carcinoma, diffuse type
9780	HIST1H2BM	histone cluster 1, H2bm	769	7	0	0	0	0	0	0	0	0	0	1			1	1	H2BC14	Carcinoma, diffuse type
9781	HIST1H2BN	histone cluster 1, H2bn	775	41	0	0	0	0	0	0	0	0	0	1			1	1	H2BC15	Carcinoma, diffuse type
9782	HIST1H2BO	histone cluster 1, H2bo	1144	41	0	0	0	0	0	0	0	0	0	1			1	1	H2BC17	Carcinoma, diffuse type
9783	HIST1H3A	histone cluster 1, H3a	656	68	0	0	0	0	0	0	0	0	0	1			1	1	H3C1	Carcinoma, diffuse type
9784	HIST1H3B	histone cluster 1, H3b	804	69	0	0	0	0	0	0	0	0	0	1			1	1	H3C2	Carcinoma, diffuse type
9785	HIST1H3C	histone cluster 1, H3c	793	69	0	0	0	0	0	0	0	0	0	1			1	1	H3C3	Carcinoma, diffuse type
9786	HIST1H3D	histone cluster 1, H3d	1185	160	0	0	0	0	0	0	0	0	0	1			1	1	H3C4	Carcinoma, diffuse type
9787	HIST1H3E	histone cluster 1, H3e	413	84	0	0	0	0	0	0	0	0	0	1			1	1	H3C6	Carcinoma, diffuse type
9788	HIST1H3G	histone cluster 1, H3g	793	109	0	0	0	0	0	0	0	0	0	1			1	1	H3C8	Carcinoma, diffuse type
9789	HIST1H3H	histone cluster 1, H3h	1188	7	0	0	0	0	0	0	0	0	0	1			1	1	H3C10	Carcinoma, diffuse type
9790	HIST1H3I	histone cluster 1, H3i	726	41	0	0	0	0	0	0	0	0	0	1			1	1	H3C11	Carcinoma, diffuse type
9791	HIST1H3J	histone cluster 1, H3j	1136	41	0	0	0	0	0	0	0	0	0	1			1	1	H3C12	Carcinoma, diffuse type
9792	HIST1H4A	histone cluster 1, H4a	725	69	0	0	0	0	0	0	0	0	0	1			1	1	H4C1	Carcinoma, diffuse type
9793	HIST1H4B	histone cluster 1, H4b	314	70	0	0	0	0	0	0	0	0	0	1			1	1	H4C2	Carcinoma, diffuse type
9794	HIST1H4C	histone cluster 1, H4c	314	120	0	0	0	0	0	0	0	0	0	1			1	1	H4C3	Carcinoma, diffuse type
9795	HIST1H4E	histone cluster 1, H4e	314	19	0	0	0	0	0	0	0	0	0	1			1	1	H4C5	Carcinoma, diffuse type
9796	HIST1H4G	histone cluster 1, H4g	299	19	0	0	0	0	0	0	0	0	0	1			1	1	H4C7	Carcinoma, diffuse type
9797	HIST1H4H	histone cluster 1, H4h	314	20	0	0	0	0	0	0	0	0	0	1			1	1	H4C8	Carcinoma, diffuse type
9798	HIST1H4I	histone cluster 1, H4i	314	103	0	0	0	0	0	0	0	0	0	1			1	1	H4C9	Carcinoma, diffuse type
9799	HIST1H4J	histone cluster 1, H4j	314	7	0	0	0	0	0	0	0	0	0	1			1	1	H4C11	Carcinoma, diffuse type
9800	HIST1H4K	histone cluster 1, H4k	314	7	0	0	0	0	0	0	0	0	0	1			1	1	H4C12	Carcinoma, diffuse type
9801	HIST1H4L	histone cluster 1, H4l	315	41	0	0	0	0	0	0	0	0	0	1			1	1	H4C13	Carcinoma, diffuse type
9802	HIST2H2AA3	histone cluster 2, H2aa3	794	0	0	0	0	0	0	0	0	0	0	1			1	1	H2AC18	Carcinoma, diffuse type
9803	HIST2H2AA4	histone cluster 2, H2aa4	794	0	0	0	0	0	0	0	0	0	0	1			1	1	H2AC19	Carcinoma, diffuse type
9804	HIST2H2AB	histone cluster 2, H2ab	395	1	0	0	0	0	0	0	0	0	0	1			1	1	H2AC21	Carcinoma, diffuse type
9805	HIST2H2AC	histone cluster 2, H2ac	773	2	0	0	0	0	0	0	0	0	0	1			1	1	H2AC20	Carcinoma, diffuse type
9806	HIST2H2BE	histone cluster 2, H2be	1165	0	0	0	0	0	0	0	0	0	0	1			1	1	H2BC21	Carcinoma, diffuse type
9807	HIST2H2BF	histone cluster 2, H2bf	1792	13	0	0	0	0	0	0	0	0	0	1			1	1	H2BC18	Carcinoma, diffuse type
9808	HIST2H3C	histone cluster 2, H3c	830	0	0	0	0	0	0	0	0	0	0	1			1	1	H3C14	Carcinoma, diffuse type
9809	HIST2H3D	histone cluster 2, H3d	409	4	0	0	0	0	0	0	0	0	0	1			1	1	H3C13	Carcinoma, diffuse type
9810	HIST2H4A	histone cluster 2, H4a	632	0	0	0	0	0	0	0	0	0	0	1			1	1	H4C14	Carcinoma, diffuse type
9811	HIST2H4B	histone cluster 2, H4b	632	0	0	0	0	0	0	0	0	0	0	1			1	1	H4C15	Carcinoma, diffuse type
9812	HIST3H2A	histone cluster 3, H2a	778	9	0	0	0	0	0	0	0	0	0	1			1	1	H2AC25	Carcinoma, diffuse type
9813	HIST3H2BB	histone cluster 3, H2bb	778	9	0	0	0	0	0	0	0	0	0	1			1	1	H2BC26	Carcinoma, diffuse type
9814	HIST3H3	histone cluster 3, H3	413	9	0	0	0	0	0	0	0	0	0	1			1	1	H3-4	Carcinoma, diffuse type
[truncated: 5,876 more rows]
